# Supplementary material for: Characterizing the nuclear and cytoplasmic transcriptomes in developing and mature human cortex uncovers new insight into psychiatric disease gene regulation
Source: HighWire-hosted journal article supplement (doi:10.1101/gr.250217.119), 2019-12-18
Supplement: Supplemental_Tables.xlsx [file Supplemental_Tables.xlsx]

## Sheet: Index
Index:
Table S1	Phenotype and Sequencing Information
Table S2	Differentially Expressed Genes by Fraction in Adult and Prenatal Samples
Table S3	Differentially Expressed Genes by Age in Cytoplasmic and Nuclear Samples
Table S4	Group-Unique A->I editing sites identified in the data
Table S5	Summary of uniquely edited sites by fraction and age
Table S6	RNA Binding Protein Sequence Motif Enrichment
Table S7	Genes included in each gene set
Table S8	Disease Gene Set Enrichment in Fraction-Regulated Gene Groups (Human Cortical Tissue)
Table S9	Disease Gene Set Enrichment in Fraction-Regulated Gene Groups (ENCODE Cell Lines)

## Sheet: Table S1 Phenotype Data 
Table S1: Phenotype and Sequencing Information
Sample ID	BrNum	Age Group	Fraction	Library	Numeric Age	Sex	Race	RIN	ug Total	Yield (ug/mg)	Read Length	numReads	numMapped	numUnmapped	overallMapRate	mitoMapped	mitoRate	totalAssignedGene	rRNA_rate
Br1113C1_polyA	Br1113	Adult	Cytosol	polyA	51.9	F	CAUC	8.3	7.8235	0.521567	100	23665064	18890853	4774211	0.7983	2333652	0.1215	0.8543	1.38804e-06
Br1113C1_RiboZero	Br1113	Adult	Cytosol	RiboZero	51.9	F	CAUC	8.3	7.8235	0.521567	100	53949390	46463584	7485806	0.8612	13682329	0.2944	0.591	4.42427e-05
Br1113N1_polyA	Br1113	Adult	Nucleus	polyA	51.9	F	CAUC	7.9	0.99	0.066	100	26883250	23594709	3288541	0.8777	5313277	0.22	0.8379	3.56396e-06
Br2046C_polyA	Br2046	Adult	Cytosol	polyA	44.7	M	AA	7.9	6.0795	0.4053	100	23979772	19294706	4685066	0.8046	2007229	0.1022	0.8526	2.36705e-06
Br2046C_RiboZero	Br2046	Adult	Cytosol	RiboZero	44.7	M	AA	7.9	6.0795	0.4053	100	67377142	62511989	4865153	0.9278	18335116	0.2962	0.6347	1.41818e-05
Br2046N_polyA	Br2046	Adult	Nucleus	polyA	44.7	M	AA	7	0.813	0.0542	100	26500922	22797965	3702957	0.8603	3423686	0.1468	0.8324	6.25963e-06
Br2046N_RiboZero	Br2046	Adult	Nucleus	RiboZero	44.7	M	AA	7	0.813	0.0542	100	11029238	10288413	740825	0.9328	1421818	0.1364	0.3993	3.76335e-05
Br2074C_polyA	Br2074	Adult	Cytosol	polyA	44.8	M	AA	7.1	6.6345	0.4423	100	23252044	20720336	2531708	0.8911	1962567	0.0931	0.8418	2.66066e-06
Br2074C_RiboZero	Br2074	Adult	Cytosol	RiboZero	44.8	M	AA	7.1	6.6345	0.4423	100	9382278	8717517	664761	0.9291	2198805	0.2543	0.6192	1.26702e-05
Br2074N_polyA	Br2074	Adult	Nucleus	polyA	44.8	M	AA	5.8	0.883	0.0588667	100	24831052	19788496	5042556	0.7969	3538741	0.1739	0.8095	5.99052e-06
Br2074N_RiboZero	Br2074	Adult	Nucleus	RiboZero	44.8	M	AA	5.8	0.883	0.0588667	100	22046530	20648328	1398202	0.9366	2325056	0.1109	0.3116	4.83042e-05
Br5339C1_downsamp	Br5339	Prenatal	Cytosol	polyA	-0.4	F	CAUC	10	12.2025	0.8135	100	24000000	22290302	1709698	0.9288	668409	0.0291	0.8296	3.49172e-06
Br5339C1_polyA	Br5339	Prenatal	Cytosol	polyA	-0.4	F	CAUC	10	12.2025	0.8135	100	115743270	107493785	8249485	0.9287	3235700	0.029	0.8208	3.32602e-06
Br5339C1_RiboZero	Br5339	Prenatal	Cytosol	RiboZero	-0.4	F	CAUC	10	12.2025	0.8135	100	55176652	51716774	3459878	0.9373	7254436	0.1397	0.6619	1.68076e-05
Br5339N1_polyA	Br5339	Prenatal	Nucleus	polyA	-0.4	F	CAUC	9.2	0.9	0.0580667	100	25682598	21725842	3956756	0.8459	524978	0.0235	0.8074	7.64136e-06
Br5339N1_RiboZero	Br5339	Prenatal	Nucleus	RiboZero	-0.4	F	CAUC	9.2	0.9	0.0580667	100	44672598	41858936	2813662	0.937	3257647	0.0772	0.4559	7.2393e-05
Br5340C1_downsamp	Br5340	Prenatal	Cytosol	polyA	-0.4	M	AA	10	9.1575	0.6105	100	24000000	22106296	1893704	0.9211	618062	0.0271	0.8228	4.77275e-06
Br5340C1_polyA	Br5340	Prenatal	Cytosol	polyA	-0.4	M	AA	10	9.1575	0.6105	100	60169246	55425751	4743495	0.9212	1550512	0.027	0.8158	4.59419e-06
Br5340C1_RiboZero	Br5340	Prenatal	Cytosol	RiboZero	-0.4	M	AA	10	9.1575	0.6105	100	23542426	22076899	1465527	0.9377	1911513	0.0861	0.6351	5.97938e-05
Br5340N1_polyA	Br5340	Prenatal	Nucleus	polyA	-0.4	M	AA	9.8	0.931	0.0620667	100	26281130	23371503	2909627	0.8893	687808	0.0285	0.8018	7.6577e-06
Br5340N1_RiboZero	Br5340	Prenatal	Nucleus	RiboZero	-0.4	M	AA	9.8	0.931	0.0620667	100	10069786	9391643	678143	0.9327	560824	0.0587	0.4194	8.32788e-05
Br5341C1_polyA	Br5341	Prenatal	Cytosol	polyA	-0.4	M	AA	10	9.2835	0.6189	100	25165782	22872621	2293161	0.9089	676631	0.0287	0.8293	3.59529e-06
Br5341C1_RiboZero	Br5341	Prenatal	Cytosol	RiboZero	-0.4	M	AA	10	9.2835	0.6189	100	12574268	11843530	730738	0.9419	1350445	0.1153	0.6726	2.51742e-05
Br5341N1_polyA	Br5341	Prenatal	Nucleus	polyA	-0.4	M	AA	8.5	0.838	0.0558667	100	27269234	24420592	2848642	0.8955	645658	0.0256	0.8169	4.41875e-06
Br5341N1_RiboZero	Br5341	Prenatal	Nucleus	RiboZero	-0.4	M	AA	8.5	0.838	0.0558667	100	37209104	34052359	3156745	0.9152	2932925	0.0862	0.5001	5.10926e-05

## Sheet: Table S2 DEGs by Fraction
Table S2: Differentially Expressed Genes by Fraction in Adult and Prenatal Samples
	In Prenatal			In Adult										Column Name	Description
Gene ID	LFC	SE	FDR	LFC	SE	FDR	Ensembl ID	Symbol	Entrez ID	Gene Type	Group	Disease Gene Set Enrichment?		Gene ID	The gencode ID of the gene
ENSG00000005206.12	0.719919	0.216097	0.0371202	1.40692	0.244384	5.44e-07	ENSG00000005206	SPPL2B		processed_transcript	Nuclear: Both			Ensembl ID	The Ensembl ID associated with the gene
ENSG00000007541.10	0.675649	0.211185	0.0487131	0.829479	0.21379	0.0011452	ENSG00000007541	PIGQ	9091	protein_coding	Nuclear: Both			Symbol	The common gene symbol
ENSG00000008710.18_2	0.726351	0.224013	0.0439825	1.71121	0.262427	1.01e-08	ENSG00000008710	PKD1	101930075	protein_coding	Nuclear: Both			Entrez ID	The Entrez ID of the gene
ENSG00000010327.10_1	0.778604	0.243114	0.0484556	1.13256	0.306786	0.00208695	ENSG00000010327	STAB1	23166	protein_coding	Nuclear: Both			Gene Type	The type of the gene
ENSG00000012171.18_2	0.897266	0.237575	0.0122879	0.641361	0.23052	0.0256859	ENSG00000012171	SEMA3B	102465526	protein_coding	Nuclear: Both			Group	The fraction-regulated gene set of the gene
ENSG00000044090.8_1	0.573984	0.178615	0.0473436	0.842338	0.238607	0.00342696	ENSG00000044090	CUL7	9820	protein_coding	Nuclear: Both			Disease Gene Set Enrichment?	Which of the nine disease gene sets if any (see table S7) include this gene
ENSG00000056558.10_1	0.731733	0.22514	0.0432979	1.10479	0.347144	0.00925762	ENSG00000056558	TRAF1	7185	protein_coding	Nuclear: Both
ENSG00000058453.16_2	0.596659	0.171585	0.0263956	1.01899	0.268164	0.00148903	ENSG00000058453	CROCC	9696	protein_coding	Nuclear: Both			The following were reported for the comparison between ages in adult samples and prenatal samples:
ENSG00000061938.16_2	1.01038	0.212433	0.000492656	1.24944	0.195663	2.08e-08	ENSG00000061938	TNK2	10188	protein_coding	Nuclear: Both
ENSG00000063660.8_2	1.00933	0.193417	8.99e-05	1.29943	0.225206	5.2e-07	ENSG00000063660	GPC1	2817	protein_coding	Nuclear: Both			LFC	log2(Fold Change) between nucleus and cytoplasm (positive value indicates higher expression in nucleus)
ENSG00000064547.13_2	0.751858	0.202028	0.0144729	1.44257	0.31568	0.0001013	ENSG00000064547	LPAR2	9170	protein_coding	Nuclear: Both			SE	standard error
ENSG00000064932.15_1	0.596962	0.17108	0.0256813	1.18781	0.245268	3.54e-05	ENSG00000064932	SBNO2	22904	protein_coding	Nuclear: Both			FDR	false discovery rate corrected p-value
ENSG00000066735.14_2	0.827337	0.208504	0.00742738	1.49013	0.318415	6.57e-05	ENSG00000066735	KIF26A	26153	protein_coding	Nuclear: Both
ENSG00000067836.12_1	0.560394	0.168931	0.0384813	0.502125	0.162553	0.0118669	ENSG00000067836	ROGDI	79641	protein_coding	Nuclear: Both
ENSG00000067840.12_1	0.593855	0.184034	0.045603	1.05495	0.191597	1.89e-06	ENSG00000067840	PDZD4	57595	protein_coding	Nuclear: Both
ENSG00000071655.17_2	0.506173	0.155297	0.0424911	1.12587	0.235323	4.44e-05	ENSG00000071655	MBD3	53615	protein_coding	Nuclear: Both
ENSG00000072195.10	0.727368	0.221223	0.0399885	1.21549	0.19956	9.84e-08	ENSG00000072195	SPEG	100996693	protein_coding	Nuclear: Both
ENSG00000072778.19_1	0.71935	0.198901	0.0186355	1.42522	0.237252	1.54e-07	ENSG00000072778	ACADVL	37	protein_coding	Nuclear: Both
ENSG00000074964.16_1	0.589235	0.166623	0.0230594	0.966157	0.187534	9.48e-06	ENSG00000074964	ARHGEF10L	55160	protein_coding	Nuclear: Both
ENSG00000075043.18_2	0.648247	0.184077	0.0236964	0.837486	0.2489	0.00555224	ENSG00000075043	KCNQ2	3785	protein_coding	Nuclear: Both
ENSG00000078808.16_1	0.812372	0.176368	0.00087826	0.977364	0.247888	0.000927615	ENSG00000078808	SDF4	51150	protein_coding	Nuclear: Both
ENSG00000088448.14_2	0.632731	0.158272	0.00672436	0.849572	0.243304	0.00385221	ENSG00000088448	ANKRD10	55608	protein_coding	Nuclear: Both
ENSG00000088881.20_2	0.609804	0.188757	0.0452096	1.13663	0.305253	0.0018929	ENSG00000088881	EBF4	57593	protein_coding	Nuclear: Both
ENSG00000090097.20_2	0.856648	0.184119	0.000750199	1.39083	0.214721	1.25e-08	ENSG00000090097	PCBP4	57060	protein_coding	Nuclear: Both
ENSG00000090565.15_2	0.626079	0.172991	0.0185512	1.10903	0.211628	6.36e-06	ENSG00000090565	RAB11FIP3	9727	protein_coding	Nuclear: Both
ENSG00000099840.13_2	0.808624	0.244953	0.0395808	1.26143	0.353672	0.00307295	ENSG00000099840	IZUMO4	113177	protein_coding	Nuclear: Both
ENSG00000099889.13_1	0.810435	0.165041	0.000274343	0.915042	0.268951	0.00499764	ENSG00000099889	ARVCF	421	protein_coding	Nuclear: Both	Autism Spectrum Disorder (from CNVs)
ENSG00000099899.14_2	0.777285	0.186092	0.00369059	0.812898	0.234328	0.00411353	ENSG00000099899	TRMT2A	27037	protein_coding	Nuclear: Both	Autism Spectrum Disorder (from CNVs)
ENSG00000099904.15_1	0.701965	0.202537	0.026962	0.87415	0.167238	6.78e-06	ENSG00000099904	ZDHHC8	29801	protein_coding	Nuclear: Both	Autism Spectrum Disorder (from CNVs)
ENSG00000099949.18_2	0.733293	0.196919	0.0144316	1.1166	0.230953	3.63e-05	ENSG00000099949	LZTR1	8216	protein_coding	Nuclear: Both	Autism Spectrum Disorder (from CNVs)
ENSG00000100034.13_2	0.577361	0.175491	0.0399885	0.909711	0.192799	5.68e-05	ENSG00000100034	PPM1F	9647	protein_coding	Nuclear: Both
ENSG00000100239.15_2	0.508385	0.148893	0.0302858	0.436783	0.163724	0.03362	ENSG00000100239	PPP6R2	9701	protein_coding	Nuclear: Both
ENSG00000100241.20_2	0.650074	0.17521	0.0148814	1.30682	0.239314	2.32e-06	ENSG00000100241	SBF1	6305	protein_coding	Nuclear: Both	Autism Spectrum Disorder (from CNVs)
ENSG00000100258.17_2	0.591127	0.176659	0.0357216	0.968341	0.2668	0.00253636	ENSG00000100258	LMF2	91289	protein_coding	Nuclear: Both	Autism Spectrum Disorder (from CNVs)
ENSG00000100416.12_1	0.678354	0.181943	0.0142601	0.778502	0.242897	0.00876192	ENSG00000100416	TRMU	55687	protein_coding	Nuclear: Both
ENSG00000100429.17_2	0.977756	0.250166	0.00870748	2.36144	0.345093	1.79e-09	ENSG00000100429	HDAC10	83933	protein_coding	Nuclear: Both
ENSG00000101150.17_1	0.585168	0.162119	0.0188603	0.431652	0.158804	0.0299281	ENSG00000101150	TPD52L2	7165	protein_coding	Nuclear: Both
ENSG00000101199.12_1	0.77801	0.170811	0.00109909	0.686555	0.173731	0.00089876	ENSG00000101199	ARFGAP1	55738	protein_coding	Nuclear: Both
ENSG00000101203.16_1	0.812066	0.214999	0.0122879	1.45931	0.295956	2.46e-05	ENSG00000101203	COL20A1	57642	protein_coding	Nuclear: Both
ENSG00000102125.15_2	0.904204	0.20134	0.00134038	1.11728	0.243889	9.76e-05	ENSG00000102125	TAZ	6901	protein_coding	Nuclear: Both
ENSG00000102878.16_2	0.849437	0.244469	0.0264528	2.06612	0.309173	4.05e-09	ENSG00000102878	HSF4	3299	protein_coding	Nuclear: Both
ENSG00000103197.16_2	0.541476	0.158551	0.0302858	1.20905	0.258865	6.79e-05	ENSG00000103197	TSC2	7249	protein_coding	Nuclear: Both
ENSG00000103253.17_1	1.12777	0.243518	0.000792505	0.827523	0.290926	0.0221222	ENSG00000103253	HAGHL	84264	protein_coding	Nuclear: Both
ENSG00000103326.11_2	1.02846	0.191705	5.11e-05	1.54137	0.259363	2.14e-07	ENSG00000103326	CAPN15	6650	protein_coding	Nuclear: Both
ENSG00000104852.14_1	0.769211	0.163	0.000567962	1.32921	0.230161	5.08e-07	ENSG00000104852	SNRNP70	6625	protein_coding	Nuclear: Both
ENSG00000104885.17_1	0.838263	0.165587	0.000160134	1.27632	0.288484	0.000173053	ENSG00000104885	DOT1L	84444	protein_coding	Nuclear: Both
ENSG00000104936.17_2	0.9653	0.198771	0.00034963	1.43634	0.231451	5.35e-08	ENSG00000104936	DMPK	1760	protein_coding	Nuclear: Both
ENSG00000105221.16_2	0.723454	0.149391	0.000365618	1.26901	0.286583	0.000170237	ENSG00000105221	AKT2	208	protein_coding	Nuclear: Both
ENSG00000105397.13_2	0.679826	0.186703	0.0178118	1.36158	0.278427	2.9e-05	ENSG00000105397	TYK2	7297	protein_coding	Nuclear: Both
ENSG00000106009.15_1	0.847238	0.162053	8.92e-05	1.10275	0.214452	9.92e-06	ENSG00000106009	BRAT1	221927	protein_coding	Nuclear: Both
ENSG00000107331.16_2	0.6915	0.186591	0.01499	0.999812	0.268435	0.00188961	ENSG00000107331	ABCA2	20	protein_coding	Nuclear: Both
ENSG00000107404.18_2	0.864839	0.203484	0.0030685	1.14955	0.16559	1.01e-09	ENSG00000107404	DVL1	1855	protein_coding	Nuclear: Both
ENSG00000107816.17_2	0.773362	0.166309	0.000750199	0.710866	0.202316	0.00360924	ENSG00000107816	LZTS2	84445	protein_coding	Nuclear: Both
ENSG00000109065.11_2	0.773248	0.204991	0.0123597	1.03226	0.22953	0.000131343	ENSG00000109065	T9	26151	protein_coding	Nuclear: Both
ENSG00000109736.14_1	0.669247	0.186586	0.0197889	1.23608	0.218681	9.07e-07	ENSG00000109736	MFSD10	10227	protein_coding	Nuclear: Both
ENSG00000109758.8_1	0.86069	0.235535	0.017278	1.82687	0.385699	5.33e-05	ENSG00000109758	HGFAC	3083	protein_coding	Nuclear: Both
ENSG00000110237.3_2	0.638236	0.160792	0.00742738	0.825335	0.232279	0.00320404	ENSG00000110237	ARHGEF17	9828	protein_coding	Nuclear: Both
ENSG00000110274.14_1	0.617064	0.167383	0.0158063	1.05909	0.263238	0.00070404	ENSG00000110274	CEP164	22897	protein_coding	Nuclear: Both
ENSG00000110811.19_2	0.704936	0.217846	0.0448609	1.49108	0.344987	0.000253482	ENSG00000110811	LEPREL2	10536	protein_coding	Nuclear: Both
ENSG00000111664.10_2	0.901394	0.247588	0.0178118	2.25859	0.346521	1.01e-08	ENSG00000111664	GNB3	2784	protein_coding	Nuclear: Both
ENSG00000112511.17_1	1.0503	0.184414	1.23e-05	0.812872	0.182153	0.000149842	ENSG00000112511	PHF1	5252	protein_coding	Nuclear: Both
ENSG00000113805.8_1	0.726335	0.203469	0.0208946	0.822551	0.26108	0.0101116	ENSG00000113805	CNTN3	5067	protein_coding	Nuclear: Both
ENSG00000114270.16_2	0.969958	0.234233	0.00406665	2.32191	0.289424	8.24e-13	ENSG00000114270	COL7A1	1294	protein_coding	Nuclear: Both
ENSG00000114331.13_2	0.502814	0.155938	0.04585	0.809023	0.275499	0.017526	ENSG00000114331	ACAP2	23527	protein_coding	Nuclear: Both
ENSG00000114626.17_2	0.851759	0.193092	0.00180072	0.865813	0.222869	0.00112466	ENSG00000114626	ABTB1	80325	protein_coding	Nuclear: Both
ENSG00000115694.14_1	0.503847	0.150101	0.0348912	0.575014	0.162433	0.00333544	ENSG00000115694	STK25	10494	protein_coding	Nuclear: Both
ENSG00000117335.19_2	0.752605	0.207377	0.0181827	0.599832	0.226769	0.0353769	ENSG00000117335	CD46	4179	protein_coding	Nuclear: Both
ENSG00000117385.15_1	0.638863	0.176071	0.0181827	1.26491	0.256993	2.55e-05	ENSG00000117385	LEPRE1	64175	protein_coding	Nuclear: Both
ENSG00000118046.14_2	0.60422	0.158107	0.0111151	0.729973	0.200307	0.00242802	ENSG00000118046	STK11	6794	protein_coding	Nuclear: Both
ENSG00000119688.20_2	0.541182	0.160513	0.0339381	0.98522	0.230634	0.000303866	ENSG00000119688	ABCD4	5826	protein_coding	Nuclear: Both
ENSG00000123933.15_2	0.958955	0.185703	0.000107545	1.25608	0.189467	5.55e-09	ENSG00000123933	MXD4	100616358	protein_coding	Nuclear: Both
ENSG00000124006.14_1	0.659667	0.168453	0.00863304	1.0367	0.181925	7.22e-07	ENSG00000124006	OBSL1	23363	protein_coding	Nuclear: Both
ENSG00000125503.12_1	0.61941	0.167244	0.01499	0.948845	0.182237	7.45e-06	ENSG00000125503	PPP1R12C	54776	protein_coding	Nuclear: Both
ENSG00000125520.13_2	1.10198	0.237419	0.00076793	1.07639	0.24102	0.000148212	ENSG00000125520	SLC2A4RG	56731	protein_coding	Nuclear: Both
ENSG00000125895.5_1	0.821625	0.223946	0.0165955	0.862564	0.310854	0.0260758	ENSG00000125895	TMEM74B	55321	protein_coding	Nuclear: Both
ENSG00000127415.12_2	1.12701	0.229133	0.000274343	2.04639	0.275279	4.29e-11	ENSG00000127415	IDUA	3425	protein_coding	Nuclear: Both
ENSG00000127586.16_1	1.0931	0.209758	8.99e-05	2.02276	0.26826	2.09e-11	ENSG00000127586	CHTF18	63922	protein_coding	Nuclear: Both
ENSG00000128159.11_2	0.993566	0.196029	0.000160134	1.70203	0.308307	1.76e-06	ENSG00000128159	TUBGCP6	85378	protein_coding	Nuclear: Both
ENSG00000129925.10_1	0.661521	0.175458	0.0123736	1.17693	0.190905	6.61e-08	ENSG00000129925	TMEM8A	58986	protein_coding	Nuclear: Both
ENSG00000129946.10_1	0.847909	0.220335	0.0104857	1.37142	0.233393	3.08e-07	ENSG00000129946	SHC2	25759	protein_coding	Nuclear: Both
ENSG00000129968.15_1	0.94212	0.168872	1.82e-05	1.01367	0.203862	2.07e-05	ENSG00000129968	ABHD17A	81926	protein_coding	Nuclear: Both
ENSG00000130304.16_2	0.684784	0.194776	0.023794	0.757914	0.266639	0.0222298	ENSG00000130304	SLC27A1	376497	protein_coding	Nuclear: Both
ENSG00000130653.15_1	0.91761	0.242618	0.0121839	1.29814	0.285171	0.000107255	ENSG00000130653	PNPLA7	375775	protein_coding	Nuclear: Both
ENSG00000130702.14_2	0.763558	0.228851	0.0367293	1.71452	0.209186	2.52e-13	ENSG00000130702	LAMA5	3911	protein_coding	Nuclear: Both
ENSG00000131584.18_1	1.7178	0.206884	6.07e-13	1.9543	0.216709	4.38e-16	ENSG00000131584	ACAP3	116983	protein_coding	Nuclear: Both
ENSG00000132635.16_1	0.757162	0.180966	0.00368456	0.787822	0.190455	0.000480567	ENSG00000132635	PCED1A	64773	protein_coding	Nuclear: Both
ENSG00000133256.12_1	0.847117	0.24605	0.0282634	1.28625	0.261381	2.56e-05	ENSG00000133256	PDE6B	5158	protein_coding	Nuclear: Both
ENSG00000135127.11_2	0.908619	0.232179	0.00865723	1.76914	0.27527	1.68e-08	ENSG00000135127	CCDC64	92558	protein_coding	Nuclear: Both
ENSG00000135424.15_2	0.897666	0.214648	0.00368456	1.11537	0.318743	0.00377409	ENSG00000135424	ITGA7	3679	protein_coding	Nuclear: Both
ENSG00000135502.17_2	0.861327	0.249254	0.0275868	2.56654	0.372097	1.31e-09	ENSG00000135502	SLC26A10	65012	protein_coding	Nuclear: Both
ENSG00000136378.14_1	0.796691	0.187736	0.00310109	1.36576	0.447571	0.013115	ENSG00000136378	ADAMTS7	11173	protein_coding	Nuclear: Both
ENSG00000136490.8_1	0.811048	0.191601	0.00318358	1.49278	0.222462	3.5e-09	ENSG00000136490	LIMD2	80774	protein_coding	Nuclear: Both
ENSG00000136807.12_2	0.71625	0.181125	0.00779333	1.14553	0.214401	4.06e-06	ENSG00000136807	CDK9	1025	protein_coding	Nuclear: Both
ENSG00000137070.17_2	0.792066	0.232741	0.0313089	1.11166	0.298508	0.0018903	ENSG00000137070	IL11RA	3590	protein_coding	Nuclear: Both
ENSG00000138834.12_2	0.587911	0.184148	0.049714	0.690944	0.24459	0.0231712	ENSG00000138834	MAPK8IP3	23162	protein_coding	Nuclear: Both
ENSG00000140474.12_1	0.746835	0.194769	0.0108743	1.67075	0.190865	3.15e-15	ENSG00000140474	ULK3	25989	protein_coding	Nuclear: Both
ENSG00000140983.13_2	0.958584	0.183203	8.92e-05	1.59225	0.237873	3.79e-09	ENSG00000140983	RHOT2	89941	protein_coding	Nuclear: Both
ENSG00000141258.12_2	0.621841	0.192508	0.0452096	1.38993	0.200927	1.15e-09	ENSG00000141258	SGSM2	9905	protein_coding	Nuclear: Both
ENSG00000141295.13_1	0.584076	0.177255	0.0399885	0.748699	0.267826	0.0248839	ENSG00000141295	SCRN2	90507	protein_coding	Nuclear: Both
ENSG00000142327.11_2	0.90278	0.202958	0.00155004	1.32216	0.265133	1.94e-05	ENSG00000142327	RNPEPL1	57140	protein_coding	Nuclear: Both
ENSG00000142330.19_2	0.749729	0.196884	0.0112729	1.3732	0.21516	2.12e-08	ENSG00000142330	CAPN10	11132	protein_coding	Nuclear: Both
ENSG00000143537.13_2	0.737728	0.193242	0.0111391	0.966626	0.224689	0.000272805	ENSG00000143537	ADAM15	8751	protein_coding	Nuclear: Both
ENSG00000143554.13_2	0.688469	0.214975	0.0484556	1.15101	0.276387	0.000438593	ENSG00000143554	SLC27A3	11000	protein_coding	Nuclear: Both
ENSG00000144406.18_2	0.691621	0.205552	0.034148	1.04615	0.179797	4.18e-07	ENSG00000144406	UNC80	285175	protein_coding	Nuclear: Both
ENSG00000144589.20_1	0.630928	0.195185	0.0451306	1.74237	0.25627	2.3e-09	ENSG00000144589	STK11IP	114790	protein_coding	Nuclear: Both
ENSG00000145214.13_2	1.42225	0.217648	1.27e-07	1.4767	0.243689	1.17e-07	ENSG00000145214	DGKQ	1609	protein_coding	Nuclear: Both
ENSG00000146830.9_1	0.747244	0.185549	0.00615113	1.2269	0.18677	7.79e-09	ENSG00000146830	GIGYF1	64599	protein_coding	Nuclear: Both
ENSG00000148341.17_1	0.694625	0.170561	0.00520921	0.558662	0.190008	0.0173787	ENSG00000148341	SH3GLB2	56904	protein_coding	Nuclear: Both
ENSG00000148343.18_2	0.750537	0.205583	0.017413	0.98916	0.200602	2.46e-05	ENSG00000148343	FAM73B	84895	protein_coding	Nuclear: Both
ENSG00000148384.12_2	0.749445	0.196228	0.0111391	1.11482	0.182172	8.33e-08	ENSG00000148384	INPP5E	56623	protein_coding	Nuclear: Both
ENSG00000154358.20_2	0.969853	0.170814	1.26e-05	1.53567	0.227273	2.82e-09	ENSG00000154358	OBSCN	84033	protein_coding	Nuclear: Both
ENSG00000158106.13_2	1.15812	0.23219	0.000228782	1.47636	0.231133	2.07e-08	ENSG00000158106	RHPN1	114822	protein_coding	Nuclear: Both
ENSG00000158717.10_1	0.684314	0.197616	0.0271501	0.927626	0.222839	0.000440546	ENSG00000158717	RNF166	115992	protein_coding	Nuclear: Both
ENSG00000158805.11_1	0.937338	0.214381	0.00196505	2.01733	0.32031	3.39e-08	ENSG00000158805	ZNF276	92822	protein_coding	Nuclear: Both
ENSG00000158815.10_1	0.834675	0.250172	0.0367293	1.80281	0.28827	4.21e-08	ENSG00000158815	FGF17	8822	protein_coding	Nuclear: Both
ENSG00000158987.20_2	0.7546	0.214574	0.023794	1.12648	0.246882	0.000103884	ENSG00000158987	RAPGEF6	51735	protein_coding	Nuclear: Both
ENSG00000159069.13_2	0.720298	0.177873	0.00569727	0.936391	0.178606	6.32e-06	ENSG00000159069	FBXW5	54461	protein_coding	Nuclear: Both
ENSG00000160200.17_1	0.901894	0.246397	0.0170605	1.69948	0.418687	0.000627848	ENSG00000160200	CBS	875	protein_coding	Nuclear: Both
ENSG00000160323.18_1	0.937981	0.214697	0.00197004	1.72099	0.25113	1.7e-09	ENSG00000160323	ADAMTS13	11093	protein_coding	Nuclear: Both
ENSG00000160360.11_2	0.595502	0.173825	0.0297435	0.765014	0.20804	0.00218549	ENSG00000160360	GPSM1	26086	protein_coding	Nuclear: Both
ENSG00000160957.12_2	0.868329	0.21672	0.00653255	1.41189	0.306045	8.59e-05	ENSG00000160957	RECQL4	9401	protein_coding	Nuclear: Both
ENSG00000160959.7_2	0.721651	0.202369	0.021093	0.603986	0.182981	0.00674378	ENSG00000160959	LRRC14	9684	protein_coding	Nuclear: Both
ENSG00000160972.9_2	0.752387	0.216064	0.0261435	1.09277	0.262663	0.000443556	ENSG00000160972	PPP1R16A	84988	protein_coding	Nuclear: Both
ENSG00000161904.11_2	0.537393	0.16271	0.0395751	0.784731	0.210172	0.00183613	ENSG00000161904	LEMD2	221496	protein_coding	Nuclear: Both
ENSG00000161996.18_2	0.953254	0.226501	0.00338488	1.8981	0.295285	1.68e-08	ENSG00000161996	WDR90	197335	protein_coding	Nuclear: Both
ENSG00000162004.16_1	1.53925	0.249691	9.41e-07	2.37104	0.281352	4.62e-14	ENSG00000162004	CCDC78	124093	protein_coding	Nuclear: Both
ENSG00000162066.14_2	0.947248	0.224479	0.00329409	1.12952	0.258127	0.000209413	ENSG00000162066	AMDHD2	752014	protein_coding	Nuclear: Both
ENSG00000162572.19_1	1.00062	0.23641	0.00318358	2.18571	0.240005	2.58e-16	ENSG00000162572	SCNN1D	6339	protein_coding	Nuclear: Both
ENSG00000162591.15_1	1.37482	0.221112	7.56e-07	1.54868	0.268704	5.31e-07	ENSG00000162591	MEGF6	1953	protein_coding	Nuclear: Both
ENSG00000162878.12_1	0.941816	0.209399	0.00132807	1.49734	0.226362	5.97e-09	ENSG00000162878	PKDCC	91461	protein_coding	Nuclear: Both
ENSG00000164050.12_1	0.881924	0.170796	0.000107545	0.971091	0.304423	0.00908273	ENSG00000164050	PLXNB1	5364	protein_coding	Nuclear: Both
ENSG00000164418.19_1	0.807091	0.196436	0.004587	0.889468	0.234584	0.00152722	ENSG00000164418	GRIK2	2898	protein_coding	Nuclear: Both
ENSG00000164828.17_2	0.60394	0.15949	0.0120408	0.594125	0.185758	0.00890148	ENSG00000164828	SUN1	23353	protein_coding	Nuclear: Both
ENSG00000164877.18_1	0.881665	0.244511	0.0190315	1.91512	0.306125	4.18e-08	ENSG00000164877	MICALL2	79778	protein_coding	Nuclear: Both
ENSG00000164880.15_1	0.685808	0.19871	0.0277517	1.01077	0.167901	1.46e-07	ENSG00000164880	INTS1	26173	protein_coding	Nuclear: Both
ENSG00000164896.19_1	1.03779	0.184214	1.51e-05	0.929698	0.254059	0.00231208	ENSG00000164896	FASTK	10922	protein_coding	Nuclear: Both
ENSG00000167302.10_2	0.72559	0.220638	0.0399885	1.7023	0.329543	8.91e-06	ENSG00000167302	ENTHD2	146705	protein_coding	Nuclear: Both
ENSG00000167393.17_2	0.763251	0.175933	0.0021517	0.776442	0.29495	0.0363707	ENSG00000167393	PPP2R3B	28227	protein_coding	Nuclear: Both
ENSG00000167702.11_1	0.87893	0.224427	0.00863304	1.64435	0.296428	1.54e-06	ENSG00000167702	KIFC2	90990	protein_coding	Nuclear: Both
ENSG00000167962.13_2	0.632699	0.180675	0.0248372	0.884238	0.274196	0.0083085	ENSG00000167962	ZNF598	90850	protein_coding	Nuclear: Both
ENSG00000167967.15_2	0.73544	0.16846	0.00197319	0.897292	0.217917	0.00051403	ENSG00000167967	E4F1	1877	protein_coding	Nuclear: Both
ENSG00000168010.10_2	0.761849	0.223064	0.0302858	0.903201	0.256997	0.00360315	ENSG00000168010	ATG16L2	89849	protein_coding	Nuclear: Both
ENSG00000168056.15_2	0.783995	0.178091	0.00183499	0.907836	0.243069	0.0018289	ENSG00000168056	LTBP3	4054	protein_coding	Nuclear: Both
ENSG00000168477.17_2	0.792398	0.218212	0.0181741	1.19668	0.27347	0.000209413	ENSG00000168477	TNXB	7148	protein_coding	Nuclear: Both
ENSG00000168936.10_1	0.887145	0.198311	0.00141921	0.689908	0.198385	0.00402192	ENSG00000168936	TMEM129	92305	protein_coding	Nuclear: Both
ENSG00000168970.22_2	0.981406	0.244705	0.00648338	2.08136	0.41271	1.55e-05	ENSG00000168970	JMJD7-PLA2G4B	8681	protein_coding	Nuclear: Both
ENSG00000169635.9_1	0.752104	0.198363	0.0119257	0.943774	0.307003	0.0123458	ENSG00000169635	HIC2	23119	protein_coding	Nuclear: Both	Schizophrenia (from CNVs)
ENSG00000169660.15_2	0.8968	0.197725	0.00114766	1.20405	0.216644	1.47e-06	ENSG00000169660	HEXDC	284004	protein_coding	Nuclear: Both
ENSG00000169683.7_2	1.00499	0.22881	0.00186537	0.783806	0.267299	0.0177062	ENSG00000169683	LRRC45	201255	protein_coding	Nuclear: Both
ENSG00000169718.17_1	0.835383	0.207592	0.00617536	0.871143	0.235353	0.00202422	ENSG00000169718	DUS1L	64118	protein_coding	Nuclear: Both
ENSG00000169733.11_2	0.715413	0.210592	0.0316008	1.36352	0.246881	1.74e-06	ENSG00000169733	RFNG	5986	protein_coding	Nuclear: Both
ENSG00000171163.15_1	0.661868	0.192297	0.0282634	1.72862	0.264249	9.05e-09	ENSG00000171163	ZNF692	55657	protein_coding	Nuclear: Both
ENSG00000171298.12_1	0.819571	0.214916	0.0111761	0.970565	0.23164	0.000404444	ENSG00000171298	GAA	2548	protein_coding	Nuclear: Both
ENSG00000173531.15_2	0.810761	0.231839	0.0251737	1.82995	0.345162	4.85e-06	ENSG00000173531	MST1	4485	protein_coding	Nuclear: Both
ENSG00000173991.5_1	0.898976	0.242731	0.01499	0.84447	0.321082	0.0365836	ENSG00000173991	TCAP	8557	protein_coding	Nuclear: Both
ENSG00000176155.18_1	0.759341	0.20273	0.0134016	1.49141	0.319475	6.84e-05	ENSG00000176155	CCDC57	284001	protein_coding	Nuclear: Both
ENSG00000176978.13_1	0.956601	0.186504	0.00012464	0.688967	0.236358	0.0184893	ENSG00000176978	DPP7	29952	protein_coding	Nuclear: Both
ENSG00000177595.17_1	0.734961	0.210568	0.0256813	2.03632	0.231609	2.69e-15	ENSG00000177595	PIDD	55367	protein_coding	Nuclear: Both
ENSG00000177666.16_2	0.69267	0.20943	0.0393338	0.541396	0.207061	0.03781	ENSG00000177666	PNPLA2	57104	protein_coding	Nuclear: Both
ENSG00000177853.14_2	0.625207	0.179419	0.0260276	0.836993	0.297918	0.0240224	ENSG00000177853	ZNF518A	9849	protein_coding	Nuclear: Both
ENSG00000177943.13_2	1.14109	0.23984	0.000492656	2.22561	0.305003	1.07e-10	ENSG00000177943	MAMDC4	158056	protein_coding	Nuclear: Both
ENSG00000177990.11_2	0.988586	0.198519	0.000231225	1.29439	0.226649	6.81e-07	ENSG00000177990	DPY19L2	283417	protein_coding	Nuclear: Both
ENSG00000178026.12_1	0.816015	0.190282	0.00266289	0.793359	0.249726	0.00940517	ENSG00000178026	FAM211B	388886	protein_coding	Nuclear: Both
ENSG00000178209.14_2	0.668559	0.183336	0.0175986	0.940015	0.288685	0.00760193	ENSG00000178209	PLEC	5339	protein_coding	Nuclear: Both
ENSG00000178252.17_2	0.482398	0.148449	0.0432979	1.1309	0.265627	0.000317643	ENSG00000178252	WDR6	11180	protein_coding	Nuclear: Both
ENSG00000178685.13_2	0.872579	0.228097	0.0110974	0.912555	0.255385	0.00301035	ENSG00000178685	PARP10	84875	protein_coding	Nuclear: Both
ENSG00000179335.18_2	0.549427	0.167354	0.0399885	0.648842	0.214698	0.014128	ENSG00000179335	CLK3	1198	protein_coding	Nuclear: Both
ENSG00000179364.13_2	0.646575	0.168616	0.0108743	1.1519	0.176902	1.03e-08	ENSG00000179364	PACS2	101929695	protein_coding	Nuclear: Both
ENSG00000179698.13_1	1.10429	0.242795	0.00109909	3.04852	0.347831	3.12e-15	ENSG00000179698	KIAA1875		protein_coding	Nuclear: Both
ENSG00000180900.17_2	0.733051	0.163299	0.00134038	0.905242	0.188119	3.93e-05	ENSG00000180900	SCRIB	23513	protein_coding	Nuclear: Both
ENSG00000181085.14_1	0.902468	0.249054	0.0183323	2.1252	0.395762	3.6e-06	ENSG00000181085	MAPK15	225689	protein_coding	Nuclear: Both
ENSG00000181409.11_1	0.777099	0.219982	0.0232727	1.19974	0.228812	6.32e-06	ENSG00000181409	AATK	9625	protein_coding	Nuclear: Both
ENSG00000182087.12_2	1.02428	0.1909	5.11e-05	1.12714	0.208558	3.04e-06	ENSG00000182087	TMEM259	91304	protein_coding	Nuclear: Both
ENSG00000182095.14_2	0.590872	0.17313	0.0303379	1.1113	0.280447	0.000868303	ENSG00000182095	TNRC18	84629	protein_coding	Nuclear: Both
ENSG00000182272.11_2	1.01722	0.206658	0.000274343	1.5824	0.217888	1.31e-10	ENSG00000182272	B4GALNT4	338707	protein_coding	Nuclear: Both
ENSG00000182325.10_2	1.14432	0.218188	8.92e-05	1.66602	0.277308	1.54e-07	ENSG00000182325	FBXL6	26233	protein_coding	Nuclear: Both
ENSG00000182685.7_1	0.93041	0.244114	0.0111939	1.79409	0.264874	2.59e-09	ENSG00000182685	BRICD5	283870	protein_coding	Nuclear: Both
ENSG00000183741.11_1	0.575585	0.175843	0.0407141	0.983103	0.214313	9.55e-05	ENSG00000183741	CBX6	23466	protein_coding	Nuclear: Both
ENSG00000184465.15_1	0.698067	0.202524	0.0279806	1.08286	0.229355	5.63e-05	ENSG00000184465	WDR27	253769	protein_coding	Nuclear: Both
ENSG00000184702.17_2	0.529258	0.148551	0.0212491	0.697288	0.176791	0.000924059	ENSG00000184702	43348	5413	protein_coding	Nuclear: Both	Autism Spectrum Disorder (from CNVs)
ENSG00000184916.8_2	0.792256	0.216739	0.017278	1.19459	0.22548	4.94e-06	ENSG00000184916	JAG2	3714	protein_coding	Nuclear: Both
ENSG00000185189.16_2	0.852834	0.194288	0.00186537	1.49883	0.311095	3.84e-05	ENSG00000185189	NRBP2	102466748	protein_coding	Nuclear: Both
ENSG00000185324.21_2	0.900431	0.181264	0.000239123	1.31003	0.227933	5.66e-07	ENSG00000185324	CDK10	8558	protein_coding	Nuclear: Both
ENSG00000185386.14_1	1.05596	0.223292	0.000551802	1.06786	0.221945	3.94e-05	ENSG00000185386	MAPK11	5600	protein_coding	Nuclear: Both
ENSG00000186301.8_1	0.878376	0.249253	0.0236964	2.11774	0.375296	9.5e-07	ENSG00000186301	MST1P2	101930052	unprocessed_pseudogene	Nuclear: Both
ENSG00000186350.9_1	0.605506	0.185512	0.0419428	0.686766	0.186824	0.002195	ENSG00000186350	RXRA	6256	protein_coding	Nuclear: Both
ENSG00000187260.15_1	0.651102	0.190431	0.0302488	0.863546	0.28121	0.0124681	ENSG00000187260	WDR86	349136	protein_coding	Nuclear: Both
ENSG00000187609.15_1	0.859215	0.231318	0.0147974	1.27343	0.289741	0.00019391	ENSG00000187609	EXD3	54932	protein_coding	Nuclear: Both
ENSG00000187961.13_2	1.20372	0.230146	8.92e-05	2.07676	0.261083	1.27e-12	ENSG00000187961	KLHL17	339451	protein_coding	Nuclear: Both
ENSG00000188157.13_2	0.700435	0.181784	0.0103557	1.40164	0.222122	3.19e-08	ENSG00000188157	AGRN	375790	protein_coding	Nuclear: Both
ENSG00000188566.12_2	0.809203	0.206578	0.00863304	1.27046	0.303879	0.000416567	ENSG00000188566	NDOR1	27158	protein_coding	Nuclear: Both
ENSG00000188747.8_2	1.01293	0.210883	0.000422353	2.01158	0.249112	5.88e-13	ENSG00000188747	NOXA1	10811	protein_coding	Nuclear: Both
ENSG00000196557.6	0.710632	0.182762	0.00915544	1.23601	0.280012	0.000180024	ENSG00000196557	CAC1H	8912	protein_coding	Nuclear: Both
ENSG00000196576.14_1	0.489501	0.153392	0.0498117	1.28784	0.266572	3.66e-05	ENSG00000196576	PLXNB2	23654	protein_coding	Nuclear: Both
ENSG00000196642.17_2	0.659358	0.154557	0.00290776	0.618005	0.210233	0.0173997	ENSG00000196642	RABL6	55684	protein_coding	Nuclear: Both
ENSG00000196700.8_2	0.632136	0.187849	0.034148	0.934434	0.215923	0.000247817	ENSG00000196700	ZNF512B	57473	protein_coding	Nuclear: Both
ENSG00000196924.14_1	0.770848	0.156212	0.000269145	1.47657	0.214465	1.41e-09	ENSG00000196924	FL	2316	protein_coding	Nuclear: Both
ENSG00000197070.13_2	0.687633	0.195591	0.023794	1.0059	0.214113	6.1e-05	ENSG00000197070	ARRDC1	92714	protein_coding	Nuclear: Both
ENSG00000197119.12_2	0.998087	0.206728	0.000384441	1.30137	0.322157	0.000670335	ENSG00000197119	SLC25A29	123096	protein_coding	Nuclear: Both
ENSG00000197530.12_2	1.00022	0.202747	0.000269145	1.35646	0.186751	1.31e-10	ENSG00000197530	MIB2	142678	protein_coding	Nuclear: Both
ENSG00000197774.12_1	1.12088	0.235396	0.000492656	2.66605	0.285676	9.47e-17	ENSG00000197774	EME2	197342	protein_coding	Nuclear: Both
ENSG00000198933.9_2	0.763843	0.211479	0.0188299	1.21029	0.251147	3.83e-05	ENSG00000198933	TBKBP1	9755	protein_coding	Nuclear: Both
ENSG00000203896.9_2	1.22791	0.250134	0.000274343	1.8635	0.347222	3.63e-06	ENSG00000203896	LIME1	54923	protein_coding	Nuclear: Both
ENSG00000204248.10_2	0.726393	0.223496	0.0432979	2.00081	0.269703	4.61e-11	ENSG00000204248	COL11A2	1302	protein_coding	Nuclear: Both
ENSG00000204305.13_2	0.911745	0.2334	0.00870748	1.54592	0.364387	0.000335064	ENSG00000204305	AGER	177	protein_coding	Nuclear: Both
ENSG00000205363.5_1	0.594786	0.171866	0.0272466	0.899168	0.168239	4.04e-06	ENSG00000205363	C15orf59	388135	protein_coding	Nuclear: Both	Autism Spectrum Disorder (from CNVs)
ENSG00000205476.8_2	0.618699	0.18725	0.0395185	1.14643	0.303519	0.00160038	ENSG00000205476	CCDC85C	317762	protein_coding	Nuclear: Both
ENSG00000212694.8_2	1.43855	0.215287	5.65e-08	1.00629	0.281458	0.00300012	ENSG00000212694		338799	lincRNA	Nuclear: Both
ENSG00000214176.9_2	0.751799	0.22135	0.0316008	2.00323	0.353444	8.48e-07	ENSG00000214176	PLEKHM1P	102464831	transcribed_unprocessed_pseudogene	Nuclear: Both
ENSG00000215440.11_2	1.39634	0.222505	5.97e-07	1.84993	0.274967	3.22e-09	ENSG00000215440	NPEPL1	100652930	protein_coding	Nuclear: Both
ENSG00000215788.9_2	0.804173	0.236526	0.0315624	2.15488	0.268287	7.98e-13	ENSG00000215788	TNFRSF25	8718	protein_coding	Nuclear: Both
ENSG00000225138.7_1	0.778538	0.221063	0.0236964	1.7295	0.288946	1.72e-07	ENSG00000225138		100288152	processed_transcript	Nuclear: Both
ENSG00000225697.11_2	0.827067	0.234478	0.0235202	1.90256	0.330235	5.36e-07	ENSG00000225697	SLC26A6	102465495	protein_coding	Nuclear: Both
ENSG00000237441.9_1	0.703623	0.16745	0.00344769	1.45287	0.28144	9.04e-06	ENSG00000237441	RGL2	5863	protein_coding	Nuclear: Both
ENSG00000246922.8_1	0.951515	0.240919	0.00788865	1.0972	0.322971	0.00507218	ENSG00000246922	UBAP1L	390595	protein_coding	Nuclear: Both
ENSG00000250571.6_2	0.789656	0.2244	0.023794	0.888222	0.257321	0.00431582	ENSG00000250571	GLI4	2738	protein_coding	Nuclear: Both
ENSG00000251322.7_2	0.737066	0.199982	0.0158063	1.45014	0.308633	6.09e-05	ENSG00000251322	SHANK3	85358	protein_coding	Nuclear: Both	Autism Spectrum Disorder (from CNVs)
ENSG00000254995.4_2	1.00854	0.239356	0.00334866	2.38664	0.435769	2.16e-06	ENSG00000254995	STX16-NPEPL1		protein_coding	Nuclear: Both
ENSG00000255571.7_2	1.03373	0.177286	6.01e-06	1.29873	0.250724	8.38e-06	ENSG00000255571	LINC00925	254559	lincRNA	Nuclear: Both
ENSG00000260807.6_2	1.13748	0.211684	5.11e-05	2.29876	0.249657	1.25e-16	ENSG00000260807		64788	lincRNA	Nuclear: Both
ENSG00000261326.2_1	1.35731	0.243317	1.82e-05	1.90362	0.353505	3.36e-06	ENSG00000261326			lincRNA	Nuclear: Both
ENSG00000262877.4_1	1.27001	0.248332	0.000130277	1.22361	0.431636	0.022656	ENSG00000262877		100507520	lincRNA	Nuclear: Both
ENSG00000266074.8_1	0.693255	0.19091	0.0181741	1.56227	0.27013	4.85e-07	ENSG00000266074	BAHCC1		protein_coding	Nuclear: Both
ENSG00000266714.6_2	1.10479	0.230157	0.000422353	1.7462	0.322444	2.87e-06	ENSG00000266714	MYO15B	80022	protein_coding	Nuclear: Both
ENSG00000271533.1_2	2.00649	0.216505	2.28e-16	1.57977	0.323094	2.9e-05	ENSG00000271533			sense_intronic	Nuclear: Both
ENSG00000012660.13_2	-0.483806	0.14521	0.0371202	-0.671401	0.262086	0.0427293	ENSG00000012660	ELOVL5	60481	protein_coding	Cytoplasmic: Both
ENSG00000052802.12_2	-0.553691	0.13032	0.0030685	-0.850257	0.170266	1.89e-05	ENSG00000052802	MSMO1	6307	protein_coding	Cytoplasmic: Both
ENSG00000065548.17_2	-0.499562	0.144739	0.0277517	-1.13068	0.196311	5.37e-07	ENSG00000065548	ZC3H15	55854	protein_coding	Cytoplasmic: Both
ENSG00000067715.13_2	-0.517914	0.117456	0.00180072	-0.797735	0.181776	0.000199244	ENSG00000067715	SYT1	6857	protein_coding	Cytoplasmic: Both
ENSG00000074696.12_1	-0.521483	0.158539	0.0399885	-0.930277	0.155447	1.72e-07	ENSG00000074696	PTPLAD1	51495	protein_coding	Cytoplasmic: Both
ENSG00000075945.12_1	-0.44636	0.135228	0.0395808	-0.76703	0.159242	3.85e-05	ENSG00000075945	KIFAP3	22920	protein_coding	Cytoplasmic: Both
ENSG00000079459.12_2	-0.485446	0.151395	0.0480854	-1.21454	0.180948	3.5e-09	ENSG00000079459	FDFT1	2222	protein_coding	Cytoplasmic: Both
ENSG00000085365.17_1	-0.452368	0.124454	0.0181244	-0.747765	0.172364	0.000238784	ENSG00000085365	SCAMP1	9522	protein_coding	Cytoplasmic: Both
ENSG00000091164.12_2	-0.536279	0.139945	0.0108809	-0.639618	0.21292	0.014765	ENSG00000091164	TXNL1	9352	protein_coding	Cytoplasmic: Both
ENSG00000092964.17_2	-0.501429	0.152246	0.0399885	-0.737058	0.186089	0.000873525	ENSG00000092964	DPYSL2	1808	protein_coding	Cytoplasmic: Both
ENSG00000102241.11_1	-0.422786	0.128652	0.0399885	-1.32414	0.219475	1.35e-07	ENSG00000102241	HTATSF1	27336	protein_coding	Cytoplasmic: Both
ENSG00000104549.11_1	-0.404581	0.123238	0.0399885	-0.762085	0.208604	0.00235851	ENSG00000104549	SQLE	6713	protein_coding	Cytoplasmic: Both
ENSG00000104660.17_2	-0.510859	0.133673	0.0111151	-0.680159	0.194664	0.00383387	ENSG00000104660	LEPROTL1	23484	protein_coding	Cytoplasmic: Both
ENSG00000105409.16_2	-0.539189	0.146394	0.0158726	-0.954842	0.242483	0.000942926	ENSG00000105409	ATP1A3	101927137	protein_coding	Cytoplasmic: Both
ENSG00000105993.14_2	-0.459163	0.122213	0.0128808	-0.924153	0.213895	0.000254938	ENSG00000105993	DJB6	10049	protein_coding	Cytoplasmic: Both
ENSG00000110958.15_1	-0.521499	0.152621	0.0302858	-1.03491	0.221333	6.66e-05	ENSG00000110958	PTGES3	10728	protein_coding	Cytoplasmic: Both
ENSG00000111726.12_1	-0.469514	0.145943	0.0468976	-0.735484	0.20182	0.00242802	ENSG00000111726	CMAS	55907	protein_coding	Cytoplasmic: Both
ENSG00000111897.6_1	-0.611576	0.129902	0.000588053	-1.19106	0.18642	2.07e-08	ENSG00000111897	SERINC1	57515	protein_coding	Cytoplasmic: Both
ENSG00000112697.15_1	-0.51304	0.131334	0.00870748	-0.931855	0.185824	1.75e-05	ENSG00000112697	TMEM30A	55754	protein_coding	Cytoplasmic: Both
ENSG00000112972.14_2	-0.5021	0.153174	0.0404327	-0.602284	0.21911	0.027761	ENSG00000112972	HMGCS1	3157	protein_coding	Cytoplasmic: Both
ENSG00000117632.21_2	-0.567984	0.168338	0.0337612	-1.35964	0.278622	3.03e-05	ENSG00000117632	STMN1	3925	protein_coding	Cytoplasmic: Both
ENSG00000119318.12_2	-0.538605	0.149862	0.0196173	-0.869305	0.178565	3.18e-05	ENSG00000119318	RAD23B	5887	protein_coding	Cytoplasmic: Both
ENSG00000120265.16_2	-0.532131	0.143857	0.0151727	-1.19348	0.248001	3.93e-05	ENSG00000120265	PCMT1	5110	protein_coding	Cytoplasmic: Both
ENSG00000120438.11_2	-0.523054	0.161305	0.0439825	-1.08014	0.179729	1.52e-07	ENSG00000120438	TCP1	677812	protein_coding	Cytoplasmic: Both
ENSG00000123983.13_1	-0.510735	0.142708	0.0202775	-0.714856	0.17207	0.000452724	ENSG00000123983	ACSL3	2181	protein_coding	Cytoplasmic: Both
ENSG00000124207.16_1	-0.483573	0.148606	0.0430245	-0.862691	0.190399	0.000115286	ENSG00000124207	CSE1L	1434	protein_coding	Cytoplasmic: Both
ENSG00000124783.12_2	-0.496256	0.149162	0.0375914	-0.583175	0.182768	0.00907157	ENSG00000124783	SSR1	6745	protein_coding	Cytoplasmic: Both
ENSG00000125868.15_1	-0.623673	0.173363	0.0194531	-1.3685	0.259984	5.79e-06	ENSG00000125868	DSTN	11034	protein_coding	Cytoplasmic: Both
ENSG00000125944.18_1	-0.41709	0.124345	0.0350668	-1.0705	0.193679	1.71e-06	ENSG00000125944	HNRNPR	10236	protein_coding	Cytoplasmic: Both
ENSG00000126950.7_2	-0.555071	0.142514	0.00899155	-0.775296	0.243341	0.00917382	ENSG00000126950	TMEM35	59353	protein_coding	Cytoplasmic: Both
ENSG00000128245.14_2	-0.545419	0.140614	0.00938993	-1.2767	0.205921	5.5e-08	ENSG00000128245	YWHAH	7533	protein_coding	Cytoplasmic: Both
ENSG00000129625.12_2	-0.446067	0.133055	0.0351673	-0.91106	0.198172	9.2e-05	ENSG00000129625	REEP5	7905	protein_coding	Cytoplasmic: Both
ENSG00000129636.12_2	-0.517699	0.153852	0.034148	-0.813114	0.162409	1.81e-05	ENSG00000129636	ITFG1	81533	protein_coding	Cytoplasmic: Both
ENSG00000131507.10_1	-0.502674	0.1521	0.0395185	-0.960166	0.18238	5.78e-06	ENSG00000131507	NDFIP1	80762	protein_coding	Cytoplasmic: Both
ENSG00000133872.13_2	-0.441967	0.134774	0.0403715	-0.929956	0.20153	8.56e-05	ENSG00000133872	TMEM66	51669	protein_coding	Cytoplasmic: Both
ENSG00000138760.8_1	-0.508787	0.147255	0.0275868	-0.660159	0.207108	0.0091368	ENSG00000138760	SCARB2	950	protein_coding	Cytoplasmic: Both
ENSG00000139970.16_2	-0.422828	0.12152	0.0262969	-0.96364	0.206491	6.87e-05	ENSG00000139970	RTN1	6252	protein_coding	Cytoplasmic: Both
ENSG00000140945.16_2	-0.50481	0.152448	0.0389156	-0.810414	0.179854	0.000127073	ENSG00000140945	CDH13	1012	protein_coding	Cytoplasmic: Both
ENSG00000141424.12_1	-0.504451	0.128519	0.00858943	-0.706323	0.191128	0.00206113	ENSG00000141424	SLC39A6	25800	protein_coding	Cytoplasmic: Both
ENSG00000142192.20_2	-0.522959	0.132936	0.00834899	-1.12436	0.179958	4.3e-08	ENSG00000142192	APP	351	protein_coding	Cytoplasmic: Both
ENSG00000143153.12_1	-0.52232	0.136234	0.0108743	-1.09976	0.194371	8.87e-07	ENSG00000143153	ATP1B1	481	protein_coding	Cytoplasmic: Both
ENSG00000144746.6_1	-0.450332	0.139229	0.0449534	-0.882293	0.210853	0.000411651	ENSG00000144746	ARL6IP5	10550	protein_coding	Cytoplasmic: Both
ENSG00000145284.11_1	-0.54237	0.138433	0.00863304	-0.920742	0.164989	1.3e-06	ENSG00000145284	SCD5	79966	protein_coding	Cytoplasmic: Both
ENSG00000146731.10_1	-0.513894	0.158262	0.0435379	-1.00885	0.173711	4.39e-07	ENSG00000146731	CCT6A	908	protein_coding	Cytoplasmic: Both
ENSG00000148123.14_1	-0.461843	0.141797	0.0427031	-0.720887	0.231056	0.01093	ENSG00000148123		54886	protein_coding	Cytoplasmic: Both
ENSG00000149294.16_2	-0.50698	0.141356	0.0197889	-0.706006	0.218351	0.0081056	ENSG00000149294	NCAM1	4684	protein_coding	Cytoplasmic: Both
ENSG00000150625.16_2	-0.485202	0.141517	0.0295688	-0.700007	0.181421	0.00122867	ENSG00000150625	GPM6A	2823	protein_coding	Cytoplasmic: Both
ENSG00000152377.13_1	-0.579106	0.127248	0.00109909	-1.04527	0.21284	2.67e-05	ENSG00000152377	SPOCK1	6695	protein_coding	Cytoplasmic: Both
ENSG00000155304.5_1	-0.44956	0.129541	0.0266241	-0.687284	0.200055	0.00454015	ENSG00000155304	HSPA13	6782	protein_coding	Cytoplasmic: Both
ENSG00000156298.12_2	-0.527693	0.146888	0.0196322	-1.2665	0.251779	1.64e-05	ENSG00000156298	TSPAN7	7102	protein_coding	Cytoplasmic: Both	Intellectual Disability
ENSG00000170027.6_2	-0.466132	0.138765	0.0347127	-0.81002	0.20591	0.000955303	ENSG00000170027	YWHAG	7532	protein_coding	Cytoplasmic: Both
ENSG00000170091.10_2	-0.451263	0.133921	0.0340503	-0.8771	0.174555	1.68e-05	ENSG00000170091		51617	protein_coding	Cytoplasmic: Both
ENSG00000170348.8_1	-0.592979	0.146713	0.00583465	-0.679435	0.176546	0.00126663	ENSG00000170348	TMED10	10972	protein_coding	Cytoplasmic: Both
ENSG00000170540.14_2	-0.525035	0.139478	0.0125927	-0.809955	0.237624	0.00490972	ENSG00000170540	ARL6IP1	23204	protein_coding	Cytoplasmic: Both
ENSG00000172348.14_1	-0.579964	0.17639	0.0399885	-0.755693	0.214361	0.00347926	ENSG00000172348	RCAN2	10231	protein_coding	Cytoplasmic: Both
ENSG00000182220.14_2	-0.584467	0.132934	0.00185614	-0.960995	0.216808	0.00016802	ENSG00000182220	ATP6AP2	10159	protein_coding	Cytoplasmic: Both	Intellectual Disability
ENSG00000183662.10_2	-0.550593	0.172075	0.0487131	-0.585607	0.206839	0.0228279	ENSG00000183662	FAM19A1	407738	protein_coding	Cytoplasmic: Both
ENSG00000185787.14_2	-0.460161	0.143495	0.0480854	-0.709764	0.20057	0.00334718	ENSG00000185787	MORF4L1	10933	protein_coding	Cytoplasmic: Both
ENSG00000196937.10_2	-0.478911	0.13996	0.0300727	-0.743839	0.278687	0.0335288	ENSG00000196937	FAM3C	10447	protein_coding	Cytoplasmic: Both
ENSG00000198689.10_2	-0.548529	0.126375	0.0021517	-0.64334	0.1842	0.003849	ENSG00000198689	SLC9A6	10479	protein_coding	Cytoplasmic: Both	Intellectual Disability
ENSG00000213860.4_1	-0.804728	0.185388	0.0021517	-1.88974	0.403042	6.34e-05	ENSG00000213860	RPL21P75	100131205	processed_pseudogene	Cytoplasmic: Both
ENSG00000019144.17_2	0.62402	0.160549	0.00915544	0.58663	0.494209	0.421213	ENSG00000019144	PHLDB1	102466719	protein_coding	Nuclear: Prenatal Only
ENSG00000033867.16_2	0.533515	0.150871	0.0230594	0.655125	0.284419	0.0740929	ENSG00000033867	SLC4A7	9497	protein_coding	Nuclear: Prenatal Only
ENSG00000068831.18_2	0.723103	0.219999	0.0399885	0.546036	0.236408	0.0732287	ENSG00000068831	RASGRP2	10235	protein_coding	Nuclear: Prenatal Only
ENSG00000087266.15_2	0.624927	0.190221	0.0399885	0.760939	0.320792	0.0645315	ENSG00000087266	SH3BP2	6452	protein_coding	Nuclear: Prenatal Only
ENSG00000095906.16_2	0.705335	0.173021	0.00516877	0.51735	0.208439	0.051168	ENSG00000095906	NUBP2	10101	protein_coding	Nuclear: Prenatal Only
ENSG00000099849.14_1	0.980864	0.234733	0.00369059	0.494154	0.303031	0.238238	ENSG00000099849	RASSF7	8045	protein_coding	Nuclear: Prenatal Only
ENSG00000100726.14_1	0.775454	0.186053	0.00379884	0.612406	0.265177	0.0732287	ENSG00000100726	TELO2	9894	protein_coding	Nuclear: Prenatal Only
ENSG00000103254.9_1	0.937449	0.226063	0.00404257	-0.279782	0.294595	0.538748	ENSG00000103254	FAM173A	65990	protein_coding	Nuclear: Prenatal Only
ENSG00000107281.9_2	1.47284	0.199784	5.03e-10	0.156502	0.269175	0.728975	ENSG00000107281	NPDC1	56654	protein_coding	Nuclear: Prenatal Only
ENSG00000115073.7_1	0.650513	0.157801	0.00436454	0.369134	0.157374	0.0682305	ENSG00000115073	ACTR1B	10120	protein_coding	Nuclear: Prenatal Only
ENSG00000120251.18_2	0.536607	0.161414	0.0376675	0.295263	0.189976	0.265261	ENSG00000120251	GRIA2	2891	protein_coding	Nuclear: Prenatal Only
ENSG00000125462.16_2	0.521748	0.154509	0.0335535	-0.115763	0.28448	0.816065	ENSG00000125462	C1orf61	10485	protein_coding	Nuclear: Prenatal Only
ENSG00000130723.17_2	0.522197	0.158548	0.0399885	0.350391	0.494947	0.664162	ENSG00000130723	PRRC2B	84726	protein_coding	Nuclear: Prenatal Only
ENSG00000135924.15_1	0.765044	0.196004	0.0087541	0.171083	0.173593	0.520202	ENSG00000135924	DJB2	3300	protein_coding	Nuclear: Prenatal Only
ENSG00000136717.14_2	0.759424	0.216529	0.0244481	0.331825	0.164501	0.127092	ENSG00000136717	BIN1	274	protein_coding	Nuclear: Prenatal Only
ENSG00000140836.14_2	0.720832	0.220152	0.0407082	0.602455	0.295231	0.122031	ENSG00000140836	ZFHX3	463	protein_coding	Nuclear: Prenatal Only
ENSG00000146063.18_1	0.558316	0.166592	0.0351793	0.486217	0.211713	0.0751342	ENSG00000146063	TRIM41	90933	protein_coding	Nuclear: Prenatal Only
ENSG00000147421.17_2	0.624419	0.179718	0.0264528	0.237847	0.247892	0.533592	ENSG00000147421	HMBOX1	79618	protein_coding	Nuclear: Prenatal Only
ENSG00000149591.16_2	0.757221	0.236036	0.0480854	0.612745	0.396227	0.2682	ENSG00000149591	TAGLN	6876	protein_coding	Nuclear: Prenatal Only
ENSG00000159788.18_2	0.459207	0.139391	0.0399885	0.383738	0.219711	0.199137	ENSG00000159788	RGS12	6002	protein_coding	Nuclear: Prenatal Only
ENSG00000165238.16_2	0.419106	0.127437	0.0399885	0.336483	0.228448	0.296847	ENSG00000165238	WNK2	65268	protein_coding	Nuclear: Prenatal Only
ENSG00000167548.14_2	0.539428	0.162837	0.0388691	0.827971	0.36475	0.0793252	ENSG00000167548	KMT2D	8085	protein_coding	Nuclear: Prenatal Only
ENSG00000169696.15_2	0.607286	0.183112	0.0384813	0.204124	0.261204	0.624742	ENSG00000169696	ASPSCR1	79058	protein_coding	Nuclear: Prenatal Only
ENSG00000172009.14_1	0.708565	0.185805	0.0111761	0.433336	0.189669	0.0769534	ENSG00000172009	THOP1	7064	protein_coding	Nuclear: Prenatal Only
ENSG00000172366.19_2	0.701463	0.219984	0.049949	0.240332	0.291842	0.602268	ENSG00000172366	FAM195A	84331	protein_coding	Nuclear: Prenatal Only
ENSG00000172922.8_1	0.71963	0.18984	0.0119257	0.449732	0.291816	0.269749	ENSG00000172922	RSEH2C	84153	protein_coding	Nuclear: Prenatal Only
ENSG00000173442.12_1	0.902225	0.20215	0.00146702	0.040017	0.27628	0.940538	ENSG00000173442	EHBP1L1	254102	protein_coding	Nuclear: Prenatal Only
ENSG00000174521.7_1	0.693596	0.195761	0.0227943	0.180569	0.274422	0.689541	ENSG00000174521	TTC9B	148014	protein_coding	Nuclear: Prenatal Only
ENSG00000182979.17_2	0.499688	0.150278	0.0376675	0.62201	0.251839	0.0524682	ENSG00000182979	MTA1	9112	protein_coding	Nuclear: Prenatal Only
ENSG00000183087.14_1	0.567389	0.172772	0.0399885	0.115707	0.182875	0.702465	ENSG00000183087	GAS6	2621	protein_coding	Nuclear: Prenatal Only
ENSG00000185000.5	0.634785	0.187246	0.0322122	0.378613	0.202549	0.163313	ENSG00000185000	DGAT1	8694	protein_coding	Nuclear: Prenatal Only
ENSG00000185633.10_1	0.675358	0.206146	0.0405698	0.25218	0.331404	0.635613	ENSG00000185633	NDUFA4L2	56901	protein_coding	Nuclear: Prenatal Only
ENSG00000185818.7_1	0.752541	0.18446	0.00514875	0.381334	0.179303	0.104493	ENSG00000185818	T8L	339983	protein_coding	Nuclear: Prenatal Only
ENSG00000187954.12_1	0.575052	0.162871	0.0233254	0.45232	0.216272	0.111675	ENSG00000187954	CYHR1	50626	protein_coding	Nuclear: Prenatal Only
ENSG00000188130.13_2	1.00191	0.221761	0.00122693	0.703355	0.296479	0.0645053	ENSG00000188130	MAPK12	6300	protein_coding	Nuclear: Prenatal Only
ENSG00000188290.10_1	0.865088	0.208236	0.00399042	0.331154	0.37036	0.566357	ENSG00000188290	HES4	57801	protein_coding	Nuclear: Prenatal Only
ENSG00000197114.11_2	0.917992	0.23131	0.00742738	0.741735	0.323896	0.0761526	ENSG00000197114	ZGPAT	84619	protein_coding	Nuclear: Prenatal Only
ENSG00000205978.5_1	0.619291	0.171995	0.0193175	0.574066	0.304796	0.159649	ENSG00000205978	NYNRIN	57523	protein_coding	Nuclear: Prenatal Only
ENSG00000213563.6_2	0.78979	0.186999	0.0032768	0.511377	0.282544	0.180182	ENSG00000213563	C8orf82	414919	protein_coding	Nuclear: Prenatal Only
ENSG00000214063.10_2	0.841698	0.192283	0.00194566	0.530637	0.275465	0.148489	ENSG00000214063	TSPAN4	7106	protein_coding	Nuclear: Prenatal Only
ENSG00000238113.6_1	0.823557	0.232625	0.0229272	0.439857	0.421566	0.490434	ENSG00000238113		100996870	lincRNA	Nuclear: Prenatal Only
ENSG00000242173.8_2	0.769551	0.228565	0.034148	-0.534579	0.334937	0.25029	ENSG00000242173	ARHGDIG	398	protein_coding	Nuclear: Prenatal Only
ENSG00000261478.1_1	0.818582	0.223077	0.0165955	0.860524	0.480137	0.185693	ENSG00000261478			lincRNA	Nuclear: Prenatal Only
ENSG00000269858.5_2	0.915755	0.242628	0.0123296	0.252962	0.274406	0.552166	ENSG00000269858	EGLN2	112398	protein_coding	Nuclear: Prenatal Only
ENSG00000271430.1_2	0.928768	0.224294	0.00406665	0.972849	0.440898	0.0897646	ENSG00000271430			sense_intronic	Nuclear: Prenatal Only
ENSG00000272849.1_2	1.46712	0.248202	4.08e-06	1.1086	0.47429	0.0692712	ENSG00000272849			lincRNA	Nuclear: Prenatal Only
ENSG00000273373.1_1	0.841113	0.243802	0.0277718	0.736206	0.361178	0.12255	ENSG00000273373			antisense	Nuclear: Prenatal Only
ENSG00000001497.16_1	0.196617	0.202974	0.673613	1.3355	0.238405	1.16e-06	ENSG00000001497	LAS1L	81887	protein_coding	Nuclear: Adult Only
ENSG00000002016.17_2	0.206962	0.176717	0.590153	1.21866	0.28597	0.000313556	ENSG00000002016	RAD52	5893	protein_coding	Nuclear: Adult Only
ENSG00000003249.13_1	-0.0133299	0.15251	0.979629	0.741636	0.214431	0.00422966	ENSG00000003249	DBNDD1	79007	protein_coding	Nuclear: Adult Only
ENSG00000004399.12_2	0.522939	0.247647	0.256598	0.645526	0.220768	0.0180876	ENSG00000004399	PLXND1	23129	protein_coding	Nuclear: Adult Only
ENSG00000004777.18_2	0.207395	0.170667	0.570743	1.1267	0.231781	3.28e-05	ENSG00000004777	ARHGAP33	115703	protein_coding	Nuclear: Adult Only	Autism Spectrum Disorder (from SAFARI)
ENSG00000004975.11_1	0.42418	0.185237	0.211072	1.47386	0.265849	1.56e-06	ENSG00000004975	DVL2	1856	protein_coding	Nuclear: Adult Only
ENSG00000005238.19_1	0.226764	0.16585	0.504629	0.684769	0.188255	0.00247843	ENSG00000005238	FAM214B	80256	protein_coding	Nuclear: Adult Only
ENSG00000005379.15_2	0.645796	0.222142	0.0861459	1.34161	0.230898	4.35e-07	ENSG00000005379	BZRAP1	9256	protein_coding	Nuclear: Adult Only
ENSG00000005513.9_1	0.440029	0.244171	0.34999	0.950513	0.170285	1.29e-06	ENSG00000005513	SOX8	30812	protein_coding	Nuclear: Adult Only
ENSG00000005884.17_1	0.439154	0.205931	0.250736	0.558849	0.205859	0.0301795	ENSG00000005884	ITGA3	3675	protein_coding	Nuclear: Adult Only	Schizophrenia (from rare SNVs)
ENSG00000005961.17_2	0.19645	0.249648		2.11516	0.335742	3.38e-08	ENSG00000005961	ITGA2B	3674	protein_coding	Nuclear: Adult Only
ENSG00000006025.11_2	0.688406	0.221819	0.0579829	1.49727	0.288103	7.8e-06	ENSG00000006025	OSBPL7	114881	protein_coding	Nuclear: Adult Only
ENSG00000006047.12_1	0.323877	0.245415		1.28314	0.33909	0.00156577	ENSG00000006047	YBX2	51087	protein_coding	Nuclear: Adult Only
ENSG00000006071.12_2	0.199879	0.247941	0.739729	1.20686	0.227406	4.75e-06	ENSG00000006071	ABCC8	6833	protein_coding	Nuclear: Adult Only
ENSG00000006282.20_2	0.398316	0.1821	0.236248	0.918082	0.218902	0.000399298	ENSG00000006282	SPATA20	64847	protein_coding	Nuclear: Adult Only
ENSG00000006576.16_1	0.248471	0.155417	0.419635	0.618755	0.216293	0.0212424	ENSG00000006576	PHTF2	57157	protein_coding	Nuclear: Adult Only
ENSG00000007202.14_2	0.211787	0.148241	0.4816	0.498736	0.189727	0.0367051	ENSG00000007202	KIAA0100	9703	protein_coding	Nuclear: Adult Only
ENSG00000007376.7_1	0.332143	0.193177	0.377174	0.749089	0.205183	0.0023785	ENSG00000007376	RPUSD1	113000	protein_coding	Nuclear: Adult Only
ENSG00000007384.15_1	0.498669	0.249897		1.22066	0.266494	9.78e-05	ENSG00000007384	RHBDF1	64285	protein_coding	Nuclear: Adult Only
ENSG00000007516.13_2	0.70043	0.223729	0.0556003	0.767594	0.200606	0.00136764	ENSG00000007516	BAIAP3	8938	protein_coding	Nuclear: Adult Only
ENSG00000007545.15_2	0.399054	0.175668	0.215299	0.88158	0.218376	0.00067558	ENSG00000007545	CRAMP1L	57585	protein_coding	Nuclear: Adult Only
ENSG00000008083.13_1	0.100087	0.157798	0.803744	0.669169	0.243315	0.0276743	ENSG00000008083	JARID2	3720	protein_coding	Nuclear: Adult Only	Schizophrenia (from rare SNVs)
ENSG00000008130.15_1	0.155014	0.172662	0.705858	0.787933	0.241616	0.00753006	ENSG00000008130	DK	65220	protein_coding	Nuclear: Adult Only
ENSG00000008256.15_1	0.395798	0.173928	0.21509	1.0029	0.19864	1.52e-05	ENSG00000008256	CYTH3	9265	protein_coding	Nuclear: Adult Only
ENSG00000008300.15_2	0.500762	0.176039	0.0955304	1.23977	0.257781	3.96e-05	ENSG00000008300	CELSR3	1951	protein_coding	Nuclear: Adult Only
ENSG00000008853.16_1	0.239953	0.159928	0.453426	0.709382	0.171418	0.000477428	ENSG00000008853	RHOBTB2	23221	protein_coding	Nuclear: Adult Only
ENSG00000009413.15_2	-0.00680972	0.137582	0.989204	0.9272	0.234698	0.000902262	ENSG00000009413	REV3L	5980	protein_coding	Nuclear: Adult Only
ENSG00000009830.11_2	0.495377	0.176635	0.101944	0.634247	0.253927	0.0494176	ENSG00000009830	POMT2	29954	protein_coding	Nuclear: Adult Only
ENSG00000009950.15_2	-0.0230693	0.118544		1.35303	0.276662	2.9e-05	ENSG00000009950	MLXIPL	51085	protein_coding	Nuclear: Adult Only
ENSG00000010295.19_2	0.449013	0.182255	0.171973	0.89394	0.193856	8.66e-05	ENSG00000010295	IFFO1	25900	protein_coding	Nuclear: Adult Only
ENSG00000010322.15_1	0.282833	0.134906	0.258998	0.579507	0.161979	0.00297839	ENSG00000010322	NISCH	11188	protein_coding	Nuclear: Adult Only	Neurodegenerative Disorder
ENSG00000010803.16_1	0.0323837	0.162364	0.951695	0.910041	0.237374	0.00133245	ENSG00000010803	SCMH1	22955	protein_coding	Nuclear: Adult Only
ENSG00000010818.8_1	0.0887562	0.188272	0.860831	1.06819	0.211631	1.53e-05	ENSG00000010818	HIVEP2	3097	protein_coding	Nuclear: Adult Only
ENSG00000011132.11_2	0.576311	0.222114	0.143619	1.13246	0.253712	0.000149603	ENSG00000011132	APBA3	9546	protein_coding	Nuclear: Adult Only
ENSG00000011243.17_2	0.443202	0.162581	0.116781	0.6987	0.238598	0.0178771	ENSG00000011243	AKAP8L	26993	protein_coding	Nuclear: Adult Only
ENSG00000011258.15_2	-0.12566	0.162085	0.752666	1.0652	0.285006	0.00181606	ENSG00000011258	MBTD1	54799	protein_coding	Nuclear: Adult Only
ENSG00000011304.18_2	0.397312	0.194463	0.273786	0.972884	0.229859	0.000347463	ENSG00000011304	PTBP1	100616459	protein_coding	Nuclear: Adult Only
ENSG00000011451.17_2	0.173954	0.138479	0.554842	1.16516	0.272143	0.00029444	ENSG00000011451	WIZ	58525	protein_coding	Nuclear: Adult Only
ENSG00000011566.14_2	0.183822	0.150341	0.567756	0.60252	0.184473	0.00741996	ENSG00000011566	MAP4K3	8491	protein_coding	Nuclear: Adult Only
ENSG00000012983.11_1	0.052859	0.158546	0.909435	0.802074	0.247277	0.00787045	ENSG00000012983	MAP4K5	11183	protein_coding	Nuclear: Adult Only
ENSG00000013306.15_2	0.341091	0.16943	0.281337	0.717729	0.243072	0.0168474	ENSG00000013306	SLC25A39	51629	protein_coding	Nuclear: Adult Only	Autism Spectrum Disorder (from SAFARI)
ENSG00000013441.15_1	-0.197464	0.138211	0.4816	0.967573	0.25036	0.00120209	ENSG00000013441	CLK1	1195	protein_coding	Nuclear: Adult Only
ENSG00000013573.16_2	0.286064	0.243915	0.58931	1.0351	0.394797	0.0372596	ENSG00000013573	DDX11	1663	protein_coding	Nuclear: Adult Only	Autism Spectrum Disorder (from SAFARI)
ENSG00000014914.19_1	0.25239	0.230749		1.30267	0.257188	1.42e-05	ENSG00000014914	MTMR11	10903	protein_coding	Nuclear: Adult Only
ENSG00000019485.12_2	0.303971	0.196423	0.435108	0.888048	0.23158	0.00132817	ENSG00000019485	PRDM11	101060179	protein_coding	Nuclear: Adult Only
ENSG00000020181.17_1	0.596815	0.248378	0.185205	1.31706	0.394237	0.00597147	ENSG00000020181	GPR124	25960	protein_coding	Nuclear: Adult Only
ENSG00000021762.19_2	0.400483	0.189273	0.256257	0.885253	0.224824	0.000943264	ENSG00000021762	OSBPL5	114879	protein_coding	Nuclear: Adult Only
ENSG00000022567.9_2	0.308631	0.206497	0.454711	0.85606	0.255692	0.00584298	ENSG00000022567	SLC45A4	57210	protein_coding	Nuclear: Adult Only
ENSG00000023287.12_2	-0.0700261	0.13153	0.838487	0.569646	0.196008	0.0189093	ENSG00000023287	RB1CC1	9821	protein_coding	Nuclear: Adult Only	Autism Spectrum Disorder (from SAFARI)
ENSG00000024048.10_1	0.0202207	0.168528	0.972701	0.584295	0.206157	0.0226829	ENSG00000024048	UBR2	23304	protein_coding	Nuclear: Adult Only
ENSG00000026036.21_2	1.0323	0.25014		2.52786	0.420417	1.51e-07	ENSG00000026036	RTEL1-TNFRSF6B		protein_coding	Nuclear: Adult Only
ENSG00000028277.21_2	0.493184	0.188593	0.140215	0.964035	0.283971	0.00510208	ENSG00000028277	POU2F2	5452	protein_coding	Nuclear: Adult Only
ENSG00000029153.14_2	-0.298253	0.223832	0.519626	0.63431	0.240559	0.0360043	ENSG00000029153	ARNTL2	56938	protein_coding	Nuclear: Adult Only
ENSG00000030066.13_2	-0.0255853	0.13612	0.953876	0.893905	0.291604	0.0126486	ENSG00000030066	NUP160	23279	protein_coding	Nuclear: Adult Only
ENSG00000033030.13_1	-0.0286118	0.148708	0.952706	0.892638	0.285254	0.0106643	ENSG00000033030	ZCCHC8	55596	protein_coding	Nuclear: Adult Only
ENSG00000033122.18_2	0.329509	0.166955	0.29602	0.951175	0.203219	6.55e-05	ENSG00000033122	LRRC7	57554	protein_coding	Nuclear: Adult Only
ENSG00000035681.7_2	0.083391	0.185245	0.870024	0.677815	0.231477	0.0178802	ENSG00000035681	NSMAF	8439	protein_coding	Nuclear: Adult Only
ENSG00000037757.13_2	0.497046	0.204951	0.179508	0.793794	0.250218	0.00953293	ENSG00000037757	MRI1	84245	protein_coding	Nuclear: Adult Only
ENSG00000038382.17_1	0.282246	0.173889	0.412778	0.692902	0.265892	0.0386213	ENSG00000038382	TRIO	7204	protein_coding	Nuclear: Adult Only
ENSG00000039319.16_2	0.288335	0.160661	0.352808	0.783761	0.222012	0.00342696	ENSG00000039319	ZFYVE16	9765	protein_coding	Nuclear: Adult Only
ENSG00000042062.11_1	0.125098	0.215676		1.6138	0.387432	0.000438193	ENSG00000042062	FAM65C	140876	protein_coding	Nuclear: Adult Only
ENSG00000044446.11_1	0.22697	0.162356	0.492512	0.776983	0.276574	0.0240278	ENSG00000044446	PHKA2	5256	protein_coding	Nuclear: Adult Only
ENSG00000047578.12_2	0.297913	0.186805	0.420856	0.886696	0.288943	0.0125308	ENSG00000047578	KIAA0556	23247	protein_coding	Nuclear: Adult Only
ENSG00000047634.14_2	0.405454	0.226677	0.355379	0.720696	0.274903	0.037275	ENSG00000047634	SCML1	6322	protein_coding	Nuclear: Adult Only
ENSG00000047644.18_2	0.39487	0.180778	0.236343	0.720023	0.27168	0.0349508	ENSG00000047644	WWC3	55841	protein_coding	Nuclear: Adult Only
ENSG00000048028.11_2	-0.132204	0.186221	0.776785	0.669149	0.234536	0.021642	ENSG00000048028	USP28	57646	protein_coding	Nuclear: Adult Only
ENSG00000048140.17_2	0.439429	0.171354	0.150927	0.723516	0.181231	0.000782363	ENSG00000048140	TSPAN17	26262	protein_coding	Nuclear: Adult Only	Autism Spectrum Disorder (from SAFARI)
ENSG00000050030.13_1	-0.0124925	0.164818	0.98219	0.596884	0.189323	0.0100575	ENSG00000050030	KIAA2022	340533	protein_coding	Nuclear: Adult Only
ENSG00000050344.8_1	-0.0281726	0.206783	0.970362	1.19878	0.374137	0.00878571	ENSG00000050344	NFE2L3	9603	protein_coding	Nuclear: Adult Only	Autism Spectrum Disorder (from SAFARI)
ENSG00000054523.17_2	-0.00498713	0.125833	0.991217	0.591904	0.199334	0.016136	ENSG00000054523	KIF1B	23095	protein_coding	Nuclear: Adult Only
ENSG00000054965.10_1	0.0593552	0.136548	0.876571	0.499601	0.197198	0.0456485	ENSG00000054965	FAM168A	23201	protein_coding	Nuclear: Adult Only
ENSG00000055483.19_2	0.406036	0.167232	0.179508	0.871112	0.232027	0.00172368	ENSG00000055483	USP36	57602	protein_coding	Nuclear: Adult Only
ENSG00000055609.17_2	0.202944	0.141826	0.480935	0.907479	0.240854	0.0016516	ENSG00000055609	KMT2C	58508	protein_coding	Nuclear: Adult Only
ENSG00000055955.15_2	0.165426	0.185594		1.47579	0.491957	0.014916	ENSG00000055955	ITIH4	3700	protein_coding	Nuclear: Adult Only	Neurodegenerative Disorder
ENSG00000057935.13_1	0.13901	0.152281	0.699531	0.5738	0.201442	0.0218984	ENSG00000057935	MTA3	57504	protein_coding	Nuclear: Adult Only
ENSG00000059145.18_2	0.317594	0.194605	0.409535	0.920786	0.255243	0.00271354	ENSG00000059145	UNKL	64718	protein_coding	Nuclear: Adult Only
ENSG00000059588.9_1	0.600873	0.217795	0.11071	1.23289	0.265112	7.38e-05	ENSG00000059588	TARBP1	6894	protein_coding	Nuclear: Adult Only
ENSG00000059915.16_2	0.27564	0.190825	0.475625	1.01052	0.198568	1.26e-05	ENSG00000059915	PSD	5662	protein_coding	Nuclear: Adult Only
ENSG00000060491.16_1	0.384636	0.158314	0.179508	1.11409	0.2332	4.55e-05	ENSG00000060491	OGFR	11054	protein_coding	Nuclear: Adult Only
ENSG00000060709.14_2	0.144174	0.165329	0.715908	0.629332	0.184041	0.00475721	ENSG00000060709	RIMBP2	23504	protein_coding	Nuclear: Adult Only
ENSG00000060718.19_2	0.0351219	0.193072	0.956332	1.39491	0.305883	0.000104685	ENSG00000060718	COL11A1	1301	protein_coding	Nuclear: Adult Only
ENSG00000060749.14_1	0.0243363	0.207531	0.972869	0.712553	0.272784	0.0380332	ENSG00000060749	QSER1	79832	protein_coding	Nuclear: Adult Only
ENSG00000061273.17_2	0.546125	0.178776	0.0641287	1.56212	0.266159	3.17e-07	ENSG00000061273	HDAC7	51564	protein_coding	Nuclear: Adult Only
ENSG00000061656.9_1	0.346392	0.247546		1.7559	0.338451	8.1e-06	ENSG00000061656	SPAG4	6676	protein_coding	Nuclear: Adult Only
ENSG00000061936.9_2	0.260248	0.15073	0.376267	0.877824	0.222957	0.000944069	ENSG00000061936	SFSWAP	6433	protein_coding	Nuclear: Adult Only
ENSG00000061987.14_1	0.25661	0.15238	0.390066	0.577456	0.220005	0.0369882	ENSG00000061987	MON2	23041	protein_coding	Nuclear: Adult Only
ENSG00000062524.15_1	0.0452681	0.136264		1.18854	0.34911	0.00496909	ENSG00000062524	LTK	4058	protein_coding	Nuclear: Adult Only
ENSG00000063176.15_2	0.178203	0.18391	0.67356	0.940898	0.274568	0.00466203	ENSG00000063176	SPHK2	56848	protein_coding	Nuclear: Adult Only
ENSG00000063438.16_2	0.186661	0.249783		1.0064	0.386253	0.0386579	ENSG00000063438	AHRR	57491	protein_coding	Nuclear: Adult Only
ENSG00000064012.21_2	0.275832	0.24164		1.10988	0.43991	0.0466159	ENSG00000064012	CASP8	841	protein_coding	Nuclear: Adult Only
ENSG00000064309.14_1	0.051401	0.227501	0.943292	0.784201	0.311111	0.0468737	ENSG00000064309	CDON	50937	protein_coding	Nuclear: Adult Only
ENSG00000064607.16_1	0.116027	0.162771	0.775773	0.726877	0.21809	0.00612153	ENSG00000064607	SUGP2	10147	protein_coding	Nuclear: Adult Only
ENSG00000064687.8	0.344757	0.249798		1.5366	0.241256	2.26e-08	ENSG00000064687	ABCA7	10347	protein_coding	Nuclear: Adult Only	Neurodegenerative Disorder
ENSG00000064999.13_2	0.302763	0.173197	0.369792	0.887736	0.205857	0.000263386	ENSG00000064999	ANKS1A	23294	protein_coding	Nuclear: Adult Only
ENSG00000065029.14_2	0.277335	0.192209	0.476114	1.05452	0.231762	0.000108118	ENSG00000065029	ZNF76	7629	protein_coding	Nuclear: Adult Only
ENSG00000065243.19_2	0.513904	0.178805	0.0915875	0.857888	0.227976	0.00167561	ENSG00000065243	PKN2	5586	protein_coding	Nuclear: Adult Only
ENSG00000065308.4_1	0.316696	0.222544	0.483634	0.900185	0.268849	0.0058403	ENSG00000065308	TRAM2	9697	protein_coding	Nuclear: Adult Only
ENSG00000065717.14_2	0.320188	0.176483	0.345676	1.39124	0.184015	1.84e-11	ENSG00000065717	TLE2	7089	protein_coding	Nuclear: Adult Only
ENSG00000065989.15_1	-0.162539	0.178454	0.700365	0.637369	0.230663	0.0268218	ENSG00000065989	PDE4A	5141	protein_coding	Nuclear: Adult Only	Autism Spectrum Disorder (from SAFARI)
ENSG00000066230.10_1	0.662511	0.244237	0.119812	1.64404	0.455062	0.00267012	ENSG00000066230	SLC9A3	6550	protein_coding	Nuclear: Adult Only
ENSG00000067798.14_2	-0.151582	0.180096	0.725237	0.600486	0.19949	0.0145833	ENSG00000067798	V3	89795	protein_coding	Nuclear: Adult Only
ENSG00000068024.16_2	0.30906	0.167911	0.337192	0.940305	0.210497	0.000147765	ENSG00000068024	HDAC4	9759	protein_coding	Nuclear: Adult Only
ENSG00000068137.14_1	0.41943	0.247964	0.38685	0.788815	0.216217	0.00240015	ENSG00000068137	PLEKHH3	79990	protein_coding	Nuclear: Adult Only
ENSG00000068724.15_2	0.479212	0.223652	0.247993	1.00501	0.237054	0.00033867	ENSG00000068724	TTC7A	57217	protein_coding	Nuclear: Adult Only
ENSG00000068878.14_1	-0.0486641	0.169081	0.923845	0.543661	0.202478	0.032297	ENSG00000068878	PSME4	23198	protein_coding	Nuclear: Adult Only
ENSG00000069020.18_2	0.0646177	0.182084	0.904017	0.535549	0.20052	0.0334254	ENSG00000069020	MAST4	375449	protein_coding	Nuclear: Adult Only
ENSG00000069424.14_1	0.305165	0.197998	0.43805	0.656869	0.209115	0.0103446	ENSG00000069424	KCB2	8514	protein_coding	Nuclear: Adult Only
ENSG00000069696.6_1	0.205815	0.233579		1.04382	0.412077	0.0456893	ENSG00000069696	DRD4	1815	protein_coding	Nuclear: Adult Only
ENSG00000070269.13_2	0.201611	0.190199	0.634846	0.736347	0.265869	0.0264097	ENSG00000070269	TMEM260	54916	protein_coding	Nuclear: Adult Only
ENSG00000070404.9_2	0.513261	0.222592	0.20838	1.39326	0.276145	1.54e-05	ENSG00000070404	FSTL3	10272	protein_coding	Nuclear: Adult Only
ENSG00000070614.14_2	0.220759	0.158897	0.495946	0.660987	0.251816	0.0369816	ENSG00000070614	NDST1	3340	protein_coding	Nuclear: Adult Only
ENSG00000070778.12_1	0.338692	0.174314	0.306381	0.682027	0.255679	0.0336329	ENSG00000070778	PTPN21	11099	protein_coding	Nuclear: Adult Only
ENSG00000070808.15_2	0.328578	0.224613	0.46836	0.872674	0.215243	0.000638381	ENSG00000070808	CAMK2A	815	protein_coding	Nuclear: Adult Only
ENSG00000071246.10_2	0.523819	0.179084	0.0835908	1.05363	0.316816	0.00625674	ENSG00000071246	VASH1	22846	protein_coding	Nuclear: Adult Only	Autism Spectrum Disorder (from SAFARI)
ENSG00000071564.14_2	0.51257	0.222255	0.20838	0.853672	0.219276	0.00109548	ENSG00000071564	TCF3	6929	protein_coding	Nuclear: Adult Only
ENSG00000071894.15_2	0.485802	0.210321	0.207914	0.779064	0.188827	0.000498162	ENSG00000071894	CPSF1	102466749	protein_coding	Nuclear: Adult Only
ENSG00000072121.15_2	0.302928	0.152456	0.29086	0.701186	0.246298	0.0219882	ENSG00000072121	ZFYVE26	23503	protein_coding	Nuclear: Adult Only
ENSG00000072310.16_2	0.417289	0.174355	0.187398	0.681908	0.223555	0.01316	ENSG00000072310	SREBF1	6720	protein_coding	Nuclear: Adult Only
ENSG00000072422.16_1	-0.269836	0.189417	0.482973	0.64103	0.238528	0.0320962	ENSG00000072422	RHOBTB1	9886	protein_coding	Nuclear: Adult Only
ENSG00000072609.17_2	0.18737	0.175685	0.632186	0.924111	0.248148	0.0018903	ENSG00000072609	CHFR	55743	protein_coding	Nuclear: Adult Only
ENSG00000073150.13_2	0.378648	0.224174	0.388125	1.17157	0.229558	1.18e-05	ENSG00000073150	PANX2	56666	protein_coding	Nuclear: Adult Only
ENSG00000073169.13_1	0.53814	0.181304	0.0772365	0.667754	0.238947	0.0249205	ENSG00000073169		83642	protein_coding	Nuclear: Adult Only
ENSG00000073417.14_2	0.518035	0.233372	0.229463	0.842429	0.285557	0.016961	ENSG00000073417	PDE8A	5151	protein_coding	Nuclear: Adult Only
ENSG00000073605.18_1	0.553998	0.238854	0.204288	1.34135	0.266533	1.63e-05	ENSG00000073605	GSDMB	55876	protein_coding	Nuclear: Adult Only
ENSG00000073670.13_2	0.609541	0.227928	0.128441	1.00631	0.213185	5.64e-05	ENSG00000073670	ADAM11	4185	protein_coding	Nuclear: Adult Only
ENSG00000074181.8_1	0.152272	0.229812	0.79374	1.22895	0.288082	0.000308906	ENSG00000074181	NOTCH3	4854	protein_coding	Nuclear: Adult Only
ENSG00000074416.13_2	0.172528	0.164982	0.639942	0.775183	0.282038	0.0277767	ENSG00000074416	MGLL	11343	protein_coding	Nuclear: Adult Only
ENSG00000074657.13_2	0.0629063	0.111493	0.827694	0.78466	0.239652	0.00726871	ENSG00000074657	ZNF532	55205	protein_coding	Nuclear: Adult Only
ENSG00000074660.15_2	0.457879	0.250019		0.798883	0.309704	0.0410366	ENSG00000074660	SCARF1	8578	protein_coding	Nuclear: Adult Only
ENSG00000074755.14_2	0.378182	0.164702	0.209771	0.890447	0.253444	0.00360952	ENSG00000074755	ZZEF1	23140	protein_coding	Nuclear: Adult Only
ENSG00000074855.10_2	0.458961	0.192242	0.188559	1.17585	0.378358	0.0112948	ENSG00000074855	ANO8	57719	protein_coding	Nuclear: Adult Only
ENSG00000074935.13_1	-0.0154746	0.162709	0.977839	1.15373	0.24487	5.83e-05	ENSG00000074935	TUBE1	51175	protein_coding	Nuclear: Adult Only
ENSG00000075240.16_2	0.451035	0.168115	0.125895	0.778827	0.217653	0.0029725	ENSG00000075240	GRAMD4	23151	protein_coding	Nuclear: Adult Only
ENSG00000075399.13_2	0.3281	0.191132	0.377488	0.987198	0.187261	5.58e-06	ENSG00000075399	VPS9D1	9605	protein_coding	Nuclear: Adult Only
ENSG00000075826.16_2	0.516482	0.24045	0.246083	1.75703	0.265237	5.65e-09	ENSG00000075826	SEC31B	25956	protein_coding	Nuclear: Adult Only
ENSG00000076108.11_1	0.245832	0.156367	0.428185	0.798919	0.267201	0.0152986	ENSG00000076108	BAZ2A	11176	protein_coding	Nuclear: Adult Only
ENSG00000076344.15_2	0.461264	0.244943	0.324468	2.40116	0.319035	2.27e-11	ENSG00000076344	RGS11	8786	protein_coding	Nuclear: Adult Only
ENSG00000076382.16_2	0.112071	0.250176	0.870781	0.852974	0.248047	0.00449118	ENSG00000076382	SPAG5	10615	protein_coding	Nuclear: Adult Only
ENSG00000076641.4_1	0.0218141	0.23518	0.978886	0.674034	0.241822	0.0253791	ENSG00000076641	PAG1	55824	protein_coding	Nuclear: Adult Only	Schizophrenia (from rare SNVs)
ENSG00000076826.9_1	0.389904	0.177914	0.235232	0.596638	0.19287	0.0117306	ENSG00000076826	CAMSAP3	57662	protein_coding	Nuclear: Adult Only
ENSG00000076864.19_2	0.373548	0.178141	0.258998	1.0363	0.194311	4.21e-06	ENSG00000076864	RAP1GAP	5909	protein_coding	Nuclear: Adult Only
ENSG00000076928.17_2	0.344809	0.179246	0.312887	1.15131	0.283205	0.000614716	ENSG00000076928	ARHGEF1	100505585	protein_coding	Nuclear: Adult Only
ENSG00000076944.15_2	0.135394	0.249998		1.19236	0.415922	0.0209441	ENSG00000076944	STXBP2	6813	protein_coding	Nuclear: Adult Only	Schizophrenia (from rare SNVs)
ENSG00000077044.10_2	0.324487	0.169251	0.313995	0.892875	0.219251	0.000600509	ENSG00000077044	DGKD	8527	protein_coding	Nuclear: Adult Only
ENSG00000077063.10_2	0.173677	0.177155	0.668555	0.796392	0.256999	0.0115827	ENSG00000077063	CTTNBP2	83992	protein_coding	Nuclear: Adult Only
ENSG00000077454.15_2	0.60741	0.228405	0.130867	1.8677	0.416962	0.000140694	ENSG00000077454	LRCH4	4034	protein_coding	Nuclear: Adult Only	Neurodegenerative Disorder
ENSG00000077458.12_1	-0.20155	0.141446	0.482973	0.842848	0.247233	0.00490417	ENSG00000077458	FAM76B	143684	protein_coding	Nuclear: Adult Only
ENSG00000077616.10_2	0.277286	0.236859	0.590153	0.824157	0.319425	0.0409979	ENSG00000077616	ALAD2	10003	protein_coding	Nuclear: Adult Only
ENSG00000078177.13_2	0.120352	0.158435	0.759713	0.979026	0.363334	0.0315542	ENSG00000078177	N4BP2	55728	protein_coding	Nuclear: Adult Only
ENSG00000078403.16_2	0.28515	0.156825	0.344657	0.897383	0.2155	0.000438807	ENSG00000078403	MLLT10	8028	protein_coding	Nuclear: Adult Only
ENSG00000078687.17_2	0.272054	0.172165	0.426239	0.75315	0.218714	0.00442373	ENSG00000078687	TNRC6C	57690	protein_coding	Nuclear: Adult Only
ENSG00000078699.21_1	0.113623	0.155636	0.768729	0.543194	0.215686	0.0470733	ENSG00000078699	CBFA2T2	9139	protein_coding	Nuclear: Adult Only
ENSG00000079134.11_2	-0.0503371	0.154659	0.912794	0.829059	0.269396	0.012258	ENSG00000079134	THOC1	9984	protein_coding	Nuclear: Adult Only
ENSG00000079277.19_2	0.108062	0.213092	0.847928	0.822558	0.271342	0.0138141	ENSG00000079277	MKNK1	8569	protein_coding	Nuclear: Adult Only
ENSG00000079313.12_2	0.368011	0.184471	0.288263	1.08093	0.268892	0.000711087	ENSG00000079313	REXO1	100302210	protein_coding	Nuclear: Adult Only
ENSG00000079337.15_2	0.694212	0.222754	0.056839	0.750302	0.235718	0.00924371	ENSG00000079337	RAPGEF3	10411	protein_coding	Nuclear: Adult Only
ENSG00000079432.7_2	0.537185	0.184648	0.0858501	0.963958	0.276838	0.00396788	ENSG00000079432	CIC	23152	protein_coding	Nuclear: Adult Only
ENSG00000079805.16_2	0.182291	0.143611	0.548569	0.694923	0.246367	0.0234471	ENSG00000079805	DNM2	1785	protein_coding	Nuclear: Adult Only
ENSG00000080573.6_1	0.263401	0.244846		1.40878	0.369927	0.00144927	ENSG00000080573	COL5A3	50509	protein_coding	Nuclear: Adult Only
ENSG00000080823.21_1	0.187918	0.217224	0.718485	0.890077	0.224818	0.000878019	ENSG00000080823	MOK	5891	protein_coding	Nuclear: Adult Only
ENSG00000080947.14_1	0.263782	0.202786	0.534606	0.751182	0.277966	0.0310174	ENSG00000080947	CROCCP3	114819	transcribed_unprocessed_pseudogene	Nuclear: Adult Only
ENSG00000081377.16_1	0.568929	0.189333	0.0717271	0.833118	0.272085	0.012753	ENSG00000081377	CDC14B	8555	protein_coding	Nuclear: Adult Only
ENSG00000081791.8_2	0.141062	0.171742	0.732673	0.584377	0.222348	0.0367337	ENSG00000081791	KIAA0141	9812	protein_coding	Nuclear: Adult Only
ENSG00000081923.11_2	-0.0167354	0.242795		0.868778	0.274133	0.00962608	ENSG00000081923	ATP8B1	5205	protein_coding	Nuclear: Adult Only
ENSG00000082014.16_1	0.178915	0.137877	0.536383	0.541375	0.188096	0.0202856	ENSG00000082014	SMARCD3	6604	protein_coding	Nuclear: Adult Only
ENSG00000082258.12_1	0.292408	0.153008	0.31567	0.701723	0.20727	0.00524141	ENSG00000082258	CCNT2	905	protein_coding	Nuclear: Adult Only	Neurodegenerative Disorder
ENSG00000082269.16_1	-0.0505833	0.144186	0.904796	0.663292	0.22025	0.0145324	ENSG00000082269	FAM135A	57579	protein_coding	Nuclear: Adult Only
ENSG00000082684.14_2	0.159597	0.226129	0.778161	0.967758	0.263681	0.00223438	ENSG00000082684	SEMA5B	54437	protein_coding	Nuclear: Adult Only
ENSG00000083097.14_1	0.1598	0.173941	0.698037	0.785077	0.2779	0.0231682	ENSG00000083097	DOPEY1	23033	protein_coding	Nuclear: Adult Only
ENSG00000083812.11_2	0.372291	0.20538	0.346447	0.714365	0.230968	0.0117448	ENSG00000083812	ZNF324	25799	protein_coding	Nuclear: Adult Only
ENSG00000083838.15_2	0.271029	0.216036	0.555362	0.795262	0.296827	0.0328111	ENSG00000083838	ZNF446	55663	protein_coding	Nuclear: Adult Only
ENSG00000084112.14_2	0.0522305	0.146331	0.903159	0.659274	0.254195	0.0397821	ENSG00000084112	SSH1	54434	protein_coding	Nuclear: Adult Only
ENSG00000084636.17_2	0.507102	0.245273	0.265935	1.12799	0.269754	0.000415881	ENSG00000084636	COL16A1	1307	protein_coding	Nuclear: Adult Only
ENSG00000084693.15_2	-0.019994	0.155274	0.971095	0.568939	0.198046	0.0205974	ENSG00000084693	AGBL5	60509	protein_coding	Nuclear: Adult Only
ENSG00000084774.13_1	0.219585	0.152387	0.47682	1.24817	0.293316	0.000320098	ENSG00000084774	CAD	790	protein_coding	Nuclear: Adult Only
ENSG00000085465.12_1	0.414795	0.250049		0.838274	0.295712	0.022656	ENSG00000085465	OVGP1	5016	protein_coding	Nuclear: Adult Only
ENSG00000085514.15_2	0.297967	0.23886		1.4241	0.343769	0.000471359	ENSG00000085514	PILRA	29992	protein_coding	Nuclear: Adult Only	Neurodegenerative Disorder
ENSG00000085733.15_1	0.236115	0.167653	0.488569	0.494975	0.181387	0.0291342	ENSG00000085733	CTTN	2017	protein_coding	Nuclear: Adult Only
ENSG00000085982.13_1	0.331194	0.188499	0.367018	0.871427	0.267237	0.00753326	ENSG00000085982	USP40	55230	protein_coding	Nuclear: Adult Only
ENSG00000085998.13_1	0.150052	0.156813	0.678979	0.460025	0.175895	0.0377773	ENSG00000085998	POMGNT1	55624	protein_coding	Nuclear: Adult Only
ENSG00000087152.15_1	0.282758	0.158823	0.358474	0.980217	0.224567	0.000217073	ENSG00000087152	ATXN7L3	56970	protein_coding	Nuclear: Adult Only	Bipolar Affective Disorder (from GWAS)
ENSG00000088256.8_1	0.400572	0.166498	0.18491	0.964895	0.22084	0.000214347	ENSG00000088256	G11	2767	protein_coding	Nuclear: Adult Only
ENSG00000088305.18_1	0.349383	0.192222	0.34485	1.33041	0.448115	0.0161467	ENSG00000088305	DNMT3B	1789	protein_coding	Nuclear: Adult Only
ENSG00000088340.15_2	0.411841	0.242098		1.78391	0.340363	6.35e-06	ENSG00000088340	FER1L4		transcribed_unitary_pseudogene	Nuclear: Adult Only
ENSG00000088387.18_2	0.0490464	0.214473	0.942104	0.583428	0.187161	0.011006	ENSG00000088387	DOCK9	23348	protein_coding	Nuclear: Adult Only
ENSG00000088854.12_2	0.18745	0.141172	0.522017	0.646671	0.251837	0.0421691	ENSG00000088854	C20orf194	25943	protein_coding	Nuclear: Adult Only
ENSG00000088888.17_1	0.322415	0.14185	0.215299	0.821256	0.252887	0.00778038	ENSG00000088888	MAVS	57506	protein_coding	Nuclear: Adult Only
ENSG00000088899.14_1	0.524719	0.201436	0.141677	0.645834	0.217779	0.0162853	ENSG00000088899		9762	protein_coding	Nuclear: Adult Only
ENSG00000089041.16_2	-0.00432721	0.241975		0.873507	0.33909	0.0413294	ENSG00000089041	P2RX7	5027	protein_coding	Nuclear: Adult Only
ENSG00000089060.11_1	0.585656	0.236138	0.168745	1.0936	0.296342	0.00209535	ENSG00000089060	SLC8B1	80024	protein_coding	Nuclear: Adult Only
ENSG00000089094.17_2	0.104686	0.128204	0.735038	0.63128	0.241264	0.0376934	ENSG00000089094	KDM2B	84678	protein_coding	Nuclear: Adult Only	Schizophrenia (from rare SNVs)
ENSG00000089154.10_1	0.336417	0.146729	0.210668	0.677796	0.213472	0.00946011	ENSG00000089154	GCN1L1	10985	protein_coding	Nuclear: Adult Only
ENSG00000089159.16_2	0.228814	0.221199	0.644601	1.04579	0.265394	0.000933977	ENSG00000089159	PXN	5829	protein_coding	Nuclear: Adult Only
ENSG00000089558.8_1	-0.051686	0.244622		1.21565	0.331285	0.00223914	ENSG00000089558	KCNH4	23415	protein_coding	Nuclear: Adult Only
ENSG00000090006.17_1	0.576467	0.195324	0.0794668	0.954622	0.202583	5.82e-05	ENSG00000090006	LTBP4	8425	protein_coding	Nuclear: Adult Only
ENSG00000090372.14_1	0.210709	0.136579	0.437535	0.547522	0.209714	0.0381656	ENSG00000090372	STRN4	29888	protein_coding	Nuclear: Adult Only
ENSG00000090447.11_1	0.064658	0.188934	0.908075	0.705383	0.272342	0.0401171	ENSG00000090447	TFAP4	7023	protein_coding	Nuclear: Adult Only
ENSG00000090534.17_1	-0.00859991	0.134382		1.05641	0.342874	0.012138	ENSG00000090534	THPO	7066	protein_coding	Nuclear: Adult Only
ENSG00000090539.15_2	0.46726	0.249995	0.329056	1.28571	0.203599	3.11e-08	ENSG00000090539	CHRD	8646	protein_coding	Nuclear: Adult Only
ENSG00000090905.18_2	0.289746	0.138104	0.258998	0.783428	0.220937	0.00327646	ENSG00000090905	TNRC6A	27327	protein_coding	Nuclear: Adult Only
ENSG00000090975.12_2	0.283694	0.206798	0.503694	1.03788	0.293564	0.00337529	ENSG00000090975	PITPNM2	57605	protein_coding	Nuclear: Adult Only
ENSG00000091137.11_1	-0.00105009	0.238602	0.999301	1.00858	0.240927	0.000409194	ENSG00000091137	SLC26A4	5172	protein_coding	Nuclear: Adult Only
ENSG00000091536.16_2	0.215132	0.205207	0.63951	1.14111	0.265405	0.000275516	ENSG00000091536	MYO15A	51168	protein_coding	Nuclear: Adult Only
ENSG00000091622.15_2	0.588219	0.220246	0.129004	1.05713	0.257378	0.000532716	ENSG00000091622	PITPNM3	83394	protein_coding	Nuclear: Adult Only
ENSG00000092051.16_2	0.245854	0.170347	0.476035	0.671726	0.229099	0.0177126	ENSG00000092051	JPH4	84502	protein_coding	Nuclear: Adult Only
ENSG00000092094.10_1	0.128437	0.223498	0.824845	0.742954	0.279829	0.0346086	ENSG00000092094	OSGEP	55644	protein_coding	Nuclear: Adult Only
ENSG00000092098.16_2	0.533904	0.195395	0.115849	0.895557	0.347456	0.0412141	ENSG00000092098	RNF31	55072	protein_coding	Nuclear: Adult Only
ENSG00000092295.11_2	0.693214	0.248599		1.81874	0.416272	0.000214347	ENSG00000092295	TGM1	7051	protein_coding	Nuclear: Adult Only
ENSG00000092439.13_2	0.115493	0.172248	0.791715	0.743159	0.223265	0.00619792	ENSG00000092439	TRPM7	54822	protein_coding	Nuclear: Adult Only
ENSG00000092929.11_2	0.8378	0.24129		1.24586	0.366478	0.00503505	ENSG00000092929	UNC13D	201294	protein_coding	Nuclear: Adult Only
ENSG00000094631.18_2	0.173644	0.151863	0.601575	0.935966	0.251842	0.00193644	ENSG00000094631	HDAC6	10013	protein_coding	Nuclear: Adult Only	Autism Spectrum Disorder (from SAFARI)
ENSG00000094914.12_2	0.13272	0.156028	0.72353	0.800124	0.200647	0.000793338	ENSG00000094914	AAAS	8086	protein_coding	Nuclear: Adult Only
ENSG00000095066.11_2	0.195279	0.198437	0.666671	1.21672	0.284812	0.000303866	ENSG00000095066	HOOK2	29911	protein_coding	Nuclear: Adult Only
ENSG00000095203.14_1	0.147446	0.225871	0.797173	0.63846	0.225561	0.0228647	ENSG00000095203	EPB41L4B	54566	protein_coding	Nuclear: Adult Only
ENSG00000095319.14_2	0.145197	0.151259	0.678162	0.837492	0.292607	0.021169	ENSG00000095319	NUP188	23511	protein_coding	Nuclear: Adult Only
ENSG00000095383.19_1	0.616632	0.228853	0.122512	1.20343	0.298107	0.00067558	ENSG00000095383	TBC1D2	55357	protein_coding	Nuclear: Adult Only
ENSG00000095564.13_1	0.206955	0.152938	0.510326	0.986608	0.287485	0.00458601	ENSG00000095564	BTAF1	9044	protein_coding	Nuclear: Adult Only	Autism Spectrum Disorder (from SAFARI)
ENSG00000095951.16_2	-0.091197	0.138997	0.795711	1.06082	0.241755	0.000199566	ENSG00000095951	HIVEP1	3096	protein_coding	Nuclear: Adult Only	Schizophrenia (from rare SNVs)
ENSG00000096433.10_1	0.603177	0.226429	0.130095	0.902211	0.345891	0.0383763	ENSG00000096433	ITPR3	3710	protein_coding	Nuclear: Adult Only
ENSG00000097007.17_2	0.248861	0.175809	0.486438	0.795294	0.301775	0.036134	ENSG00000097007	ABL1	25	protein_coding	Nuclear: Adult Only
ENSG00000097096.8_1	0.0213049	0.243758		1.20597	0.477292	0.0462456	ENSG00000097096	SYDE2	84144	protein_coding	Nuclear: Adult Only
ENSG00000099326.8_1	0.548346	0.195879	0.103063	1.27963	0.214533	1.91e-07	ENSG00000099326	MZF1	7593	protein_coding	Nuclear: Adult Only
ENSG00000099331.13_2	0.316381	0.173386	0.342731	1.17826	0.275539	0.000299891	ENSG00000099331	MYO9B	4650	protein_coding	Nuclear: Adult Only	Autism Spectrum Disorder (from SAFARI)
ENSG00000099364.16_2	0.337481	0.168201	0.284534	0.78312	0.247387	0.00971634	ENSG00000099364	FBXL19	54620	protein_coding	Nuclear: Adult Only
ENSG00000099381.16_1	0.239132	0.170337	0.490146	0.728262	0.244274	0.0156442	ENSG00000099381	SETD1A	9739	protein_coding	Nuclear: Adult Only	Neurodegenerative Disorder
ENSG00000099625.12_2	0.491761	0.209578	0.19871	1.09445	0.211826	8.88e-06	ENSG00000099625	C19orf26	255057	protein_coding	Nuclear: Adult Only
ENSG00000099814.15_1	0.599509	0.197997	0.0684513	0.85303	0.241748	0.0034457	ENSG00000099814	CEP170B	283638	protein_coding	Nuclear: Adult Only
ENSG00000099821.13_1	0.594501	0.186783	0.0505641	0.52915	0.189169	0.0247881	ENSG00000099821	POLRMT	5442	protein_coding	Nuclear: Adult Only
ENSG00000099822.2_1	0.347448	0.225524	0.43805	1.08337	0.284769	0.00146967	ENSG00000099822	HCN2	610	protein_coding	Nuclear: Adult Only
ENSG00000099864.17_2	0.174142	0.131235	0.52245	1.01611	0.192447	5.36e-06	ENSG00000099864	PALM	5064	protein_coding	Nuclear: Adult Only
ENSG00000099875.14_2	0.334997	0.175859	0.31695	0.937393	0.211484	0.00016802	ENSG00000099875	MKNK2	2872	protein_coding	Nuclear: Adult Only
ENSG00000099957.16_2	0.309134	0.222526		1.10424	0.201651	2.16e-06	ENSG00000099957	P2RX6	9127	protein_coding	Nuclear: Adult Only
ENSG00000100027.14_1	0.0572632	0.158242	0.901549	0.863859	0.297562	0.0190442	ENSG00000100027	YPEL1	29799	protein_coding	Nuclear: Adult Only
ENSG00000100031.18_2	0.545852	0.249958		1.39831	0.347128	0.000694845	ENSG00000100031	GGT1	728441	protein_coding	Nuclear: Adult Only
ENSG00000100139.13_2	0.462309	0.175687	0.137028	0.889618	0.316038	0.0237391	ENSG00000100139	MICALL1	85377	protein_coding	Nuclear: Adult Only
ENSG00000100154.14_1	0.0192288	0.117041	0.963274	0.775241	0.250822	0.0118177	ENSG00000100154	TTC28	23331	protein_coding	Nuclear: Adult Only
ENSG00000100197.20_1	0.635146	0.248937		1.73544	0.407596	0.000317557	ENSG00000100197	CYP2D6	101929829	protein_coding	Nuclear: Adult Only
ENSG00000100221.10_2	-0.0182245	0.136691	0.970362	0.552225	0.216038	0.0433268	ENSG00000100221	JOSD1	9929	protein_coding	Nuclear: Adult Only
ENSG00000100228.12_1	-0.0188156	0.207889	0.979179	0.818165	0.268526	0.0132894	ENSG00000100228	RAB36	9609	protein_coding	Nuclear: Adult Only
ENSG00000100263.13_2	0.427212	0.183903	0.203436	0.754565	0.209759	0.0027974	ENSG00000100263	RHBDD3	25807	protein_coding	Nuclear: Adult Only
ENSG00000100288.19_2	0.335442	0.247852		1.52743	0.443469	0.00441534	ENSG00000100288	CHKB	1120	protein_coding	Nuclear: Adult Only
ENSG00000100299.17_1	0.498028	0.201371	0.170058	0.97913	0.251245	0.00108091	ENSG00000100299	ARSA	410	protein_coding	Nuclear: Adult Only
ENSG00000100304.12_1	0.0547298	0.162281	0.90917	0.96905	0.19445	1.97e-05	ENSG00000100304	TTLL12	23170	protein_coding	Nuclear: Adult Only
ENSG00000100307.12_2	0.690314	0.231376	0.0748427	0.71061	0.181453	0.00101351	ENSG00000100307	CBX7	23492	protein_coding	Nuclear: Adult Only
ENSG00000100314.3_1	0.627771	0.243387		0.974904	0.35816	0.0296566	ENSG00000100314	CABP7	164633	protein_coding	Nuclear: Adult Only
ENSG00000100346.17_1	0.452761	0.239952	0.322752	0.794912	0.176391	0.000126922	ENSG00000100346	CAC1I	8911	protein_coding	Nuclear: Adult Only	Autism Spectrum Disorder (from SAFARI)
ENSG00000100359.20_2	0.576565	0.186652	0.0598924	1.17606	0.188969	4.86e-08	ENSG00000100359	SGSM3	27352	protein_coding	Nuclear: Adult Only	Autism Spectrum Disorder (from SAFARI)
ENSG00000100364.18_2	0.133311	0.151133	0.712104	1.31047	0.229981	7.22e-07	ENSG00000100364	KIAA0930	23313	protein_coding	Nuclear: Adult Only
ENSG00000100403.11_1	0.459463	0.174217	0.13641	1.16479	0.246503	5.57e-05	ENSG00000100403	ZC3H7B	23264	protein_coding	Nuclear: Adult Only
ENSG00000100425.18_1	0.18265	0.157222	0.593817	0.836775	0.24581	0.00497327	ENSG00000100425	BRD1	23774	protein_coding	Nuclear: Adult Only
ENSG00000100426.6_2	0.252701	0.165606	0.44445	0.659255	0.240108	0.0279758	ENSG00000100426	ZBED4	9889	protein_coding	Nuclear: Adult Only
ENSG00000100441.9_1	0.288495	0.212854	0.510197	1.08076	0.328057	0.00686562	ENSG00000100441	KHNYN	23351	protein_coding	Nuclear: Adult Only
ENSG00000100503.23_2	0.0821786	0.176325	0.862806	0.8048	0.198913	0.000656622	ENSG00000100503	NIN	51199	protein_coding	Nuclear: Adult Only
ENSG00000100505.13_1	0.0794622	0.159658	0.850924	0.760944	0.211708	0.00282083	ENSG00000100505	TRIM9	114088	protein_coding	Nuclear: Adult Only
ENSG00000100650.15_2	-0.0545158	0.17884	0.919034	0.656917	0.231823	0.0227006	ENSG00000100650	SRSF5	6430	protein_coding	Nuclear: Adult Only
ENSG00000100697.14_1	0.159686	0.142303	0.607738	0.788153	0.24668	0.00897376	ENSG00000100697	DICER1	23405	protein_coding	Nuclear: Adult Only
ENSG00000100836.10_2	0.259162	0.135722	0.315983	0.69748	0.241353	0.0196664	ENSG00000100836	PABPN1	8106	protein_coding	Nuclear: Adult Only
ENSG00000100918.12_2	-0.0769923	0.152404	0.84854	0.891554	0.27996	0.00921078	ENSG00000100918	REC8	9985	protein_coding	Nuclear: Adult Only
ENSG00000100968.13_1	0.213124	0.191693	0.612107	0.977634	0.349833	0.0249205	ENSG00000100968	NFATC4	4776	protein_coding	Nuclear: Adult Only
ENSG00000101004.14_2	0.207602	0.201742	0.646432	0.821744	0.284398	0.0196895	ENSG00000101004	NINL	22981	protein_coding	Nuclear: Adult Only	Autism Spectrum Disorder (from SAFARI)
ENSG00000101098.12_1	0.298389	0.196933	0.448951	1.28165	0.267923	4.44e-05	ENSG00000101098	RIMS4	140730	protein_coding	Nuclear: Adult Only
ENSG00000101104.12_1	0.026291	0.24725	0.975914	1.28716	0.350987	0.00225447	ENSG00000101104	PABPC1L	80336	protein_coding	Nuclear: Adult Only
ENSG00000101194.17_1	0.0438901	0.124695		1.3827	0.427172	0.0080243	ENSG00000101194	SLC17A9	63910	protein_coding	Nuclear: Adult Only
ENSG00000101213.6_1	0.38176	0.249006		1.48421	0.422332	0.00360335	ENSG00000101213	PTK6	5753	protein_coding	Nuclear: Adult Only
ENSG00000101216.10_1	0.514182	0.220743	0.202061	0.788758	0.239428	0.00686562	ENSG00000101216	GMEB2	26205	protein_coding	Nuclear: Adult Only
ENSG00000101224.17_1	0.267954	0.232807	0.598188	0.765818	0.205571	0.00188588	ENSG00000101224	CDC25B	994	protein_coding	Nuclear: Adult Only
ENSG00000101236.16_1	0.0583487	0.170853	0.908075	0.521264	0.18792	0.0261456	ENSG00000101236	RNF24	11237	protein_coding	Nuclear: Adult Only
ENSG00000101298.13_2	0.431581	0.224609	0.312887	0.910509	0.255556	0.00311218	ENSG00000101298	SNPH	9751	protein_coding	Nuclear: Adult Only
ENSG00000101445.9_1	0.465299	0.186813	0.167953	1.31956	0.297222	0.000164084	ENSG00000101445	PPP1R16B	26051	protein_coding	Nuclear: Adult Only
ENSG00000101596.14_2	0.0576264	0.127942	0.870024	0.752138	0.23513	0.00889121	ENSG00000101596	SMCHD1	23347	protein_coding	Nuclear: Adult Only	Schizophrenia (from rare SNVs)
ENSG00000101638.13_2	0.581684	0.213189	0.116546	0.632303	0.240015	0.0362021	ENSG00000101638	ST8SIA5	29906	protein_coding	Nuclear: Adult Only
ENSG00000101639.18_1	0.248833	0.165334	0.451928	0.899272	0.230838	0.00108595	ENSG00000101639	CEP192	55125	protein_coding	Nuclear: Adult Only
ENSG00000101665.8_1	0.34822	0.209415	0.397599	0.6758	0.198205	0.00489901	ENSG00000101665	SMAD7	4092	protein_coding	Nuclear: Adult Only
ENSG00000101680.13_1	0.144899	0.200197	0.770093	1.14884	0.431302	0.0339431	ENSG00000101680	LAMA1	284217	protein_coding	Nuclear: Adult Only	Autism Spectrum Disorder (from SAFARI)
ENSG00000102225.15_2	0.106124	0.12971	0.734455	0.867633	0.185199	6.43e-05	ENSG00000102225	CDK16	5127	protein_coding	Nuclear: Adult Only
ENSG00000102886.14_1	0.393058	0.24129	0.411209	1.17099	0.393478	0.0158764	ENSG00000102886	GDPD3	79153	protein_coding	Nuclear: Adult Only
ENSG00000102890.14_1	0.418422	0.249825		1.48637	0.406759	0.00235117	ENSG00000102890	ELMO3	79767	protein_coding	Nuclear: Adult Only
ENSG00000102901.12_2	0.376964	0.198375	0.318027	1.17896	0.303048	0.00110614	ENSG00000102901	CENPT	80152	protein_coding	Nuclear: Adult Only
ENSG00000102977.13_1	0.237844	0.17076	0.494329	0.601259	0.197645	0.0134462	ENSG00000102977	ACD	65057	protein_coding	Nuclear: Adult Only
ENSG00000103056.11_2	0.0786732	0.169636	0.863801	0.752134	0.284069	0.035157	ENSG00000103056	SMPD3	55512	protein_coding	Nuclear: Adult Only
ENSG00000103126.14_1	0.458082	0.181154	0.156751	0.899968	0.198482	0.000114354	ENSG00000103126	AXIN1	8312	protein_coding	Nuclear: Adult Only
ENSG00000103168.16_2	0.612664	0.212204	0.0891418	1.46248	0.320029	0.0001013	ENSG00000103168	TAF1C	9013	protein_coding	Nuclear: Adult Only	Autism Spectrum Disorder (from SAFARI)
ENSG00000103174.11_2	0.0998868	0.237351	0.881438	0.572076	0.196999	0.0190156	ENSG00000103174	GPA	51172	protein_coding	Nuclear: Adult Only
ENSG00000103184.11_2	0.315922	0.19677		0.818352	0.223179	0.00225463	ENSG00000103184	SEC14L5	9717	protein_coding	Nuclear: Adult Only
ENSG00000103199.13_2	0.112375	0.183884	0.811073	0.807583	0.256377	0.0101251	ENSG00000103199	ZNF500	26048	protein_coding	Nuclear: Adult Only
ENSG00000103202.12_2	0.198567	0.177101	0.60799	0.877313	0.230686	0.00147509	ENSG00000103202	NME4	4833	protein_coding	Nuclear: Adult Only
ENSG00000103245.13_2	0.261053	0.220926	0.585543	0.674292	0.23499	0.0207912	ENSG00000103245	RFL	64428	protein_coding	Nuclear: Adult Only
ENSG00000103249.17_2	0.628177	0.205882	0.0646875	1.03645	0.293517	0.00342135	ENSG00000103249	CLCN7	1186	protein_coding	Nuclear: Adult Only
ENSG00000103269.13_1	0.839556	0.238907		1.08143	0.22764	5.06e-05	ENSG00000103269	RHBDL1	9028	protein_coding	Nuclear: Adult Only
ENSG00000103495.13_2	0.369876	0.148615	0.168117	0.932534	0.305442	0.0130636	ENSG00000103495	MAZ	4150	protein_coding	Nuclear: Adult Only
ENSG00000103855.17_1	0.235537	0.150029	0.428896	0.670361	0.265098	0.0460504	ENSG00000103855	CD276	80381	protein_coding	Nuclear: Adult Only
ENSG00000103888.15_1	0.0592711	0.158289	0.896738	0.594085	0.226618	0.0372777	ENSG00000103888	KIAA1199	57214	protein_coding	Nuclear: Adult Only
ENSG00000104059.4_2	0.31757	0.218328	0.471605	1.12844	0.2443	8.41e-05	ENSG00000104059	FAM189A1	23359	protein_coding	Nuclear: Adult Only
ENSG00000104365.13_1	0.103601	0.180717	0.825231	0.664406	0.251444	0.0355911	ENSG00000104365	IKBKB	3551	protein_coding	Nuclear: Adult Only
ENSG00000104517.12_2	0.074947	0.12238	0.810754	0.693385	0.251935	0.0275321	ENSG00000104517	UBR5	51366	protein_coding	Nuclear: Adult Only	Autism Spectrum Disorder (from SAFARI)
ENSG00000104518.10_2	0.314356	0.223507		1.00029	0.323066	0.011656	ENSG00000104518	GSDMD	79792	protein_coding	Nuclear: Adult Only
ENSG00000104524.13_2	0.269578	0.232832	0.595508	0.638519	0.247675	0.0411724	ENSG00000104524	PYCRL	65263	protein_coding	Nuclear: Adult Only
ENSG00000104814.12_2	0.249998	0.243083		1.2068	0.43416	0.0258193	ENSG00000104814	MAP4K1	11184	protein_coding	Nuclear: Adult Only
ENSG00000104859.14_2	0.357429	0.163069	0.235232	1.34173	0.244261	2.01e-06	ENSG00000104859	CLASRP	11129	protein_coding	Nuclear: Adult Only
ENSG00000104866.10_2	0.449363	0.162046	0.108423	0.460946	0.17362	0.0346117	ENSG00000104866	PPP1R37	284352	protein_coding	Nuclear: Adult Only
ENSG00000104899.6_2	0.542279	0.23237		1.88535	0.317025	2.1e-07	ENSG00000104899	AMH	100423031	protein_coding	Nuclear: Adult Only
ENSG00000104907.12_1	0.35073	0.162162	0.241611	0.745015	0.212899	0.00377409	ENSG00000104907	TRMT1	55621	protein_coding	Nuclear: Adult Only
ENSG00000105063.18_2	0.418352	0.175876	0.190567	0.878981	0.264651	0.00634793	ENSG00000105063	PPP6R1	22870	protein_coding	Nuclear: Adult Only
ENSG00000105278.10_1	0.125378	0.180367	0.782264	0.971054	0.217783	0.000152031	ENSG00000105278	ZFR2	23217	protein_coding	Nuclear: Adult Only
ENSG00000105298.13_2	0.328285	0.170104	0.310818	0.773716	0.218264	0.0032883	ENSG00000105298	CACTIN	58509	protein_coding	Nuclear: Adult Only
ENSG00000105339.10_2	0.424601	0.247433	0.377488	1.31465	0.206157	2.17e-08	ENSG00000105339	DENND3	22898	protein_coding	Nuclear: Adult Only
ENSG00000105419.17_2	0.340104	0.156997	0.240454	0.643159	0.228041	0.0234642	ENSG00000105419	MEIS3	56917	protein_coding	Nuclear: Adult Only
ENSG00000105497.7_1	0.172286	0.193981	0.709493	0.730271	0.262873	0.025899	ENSG00000105497	ZNF175	7728	protein_coding	Nuclear: Adult Only
ENSG00000105552.14_2	0.467172	0.208917	0.225195	0.710362	0.253628	0.0245631	ENSG00000105552	BCAT2	587	protein_coding	Nuclear: Adult Only
ENSG00000105576.15_2	0.150154	0.13621	0.616619	0.642891	0.211432	0.0134952	ENSG00000105576	TNPO2	30000	protein_coding	Nuclear: Adult Only
ENSG00000105613.9_1	0.262495	0.174943	0.453426	0.852658	0.255998	0.00616272	ENSG00000105613	MAST1	22983	protein_coding	Nuclear: Adult Only
ENSG00000105639.18_2	0.0260652	0.201875		0.595262	0.223584	0.0340335	ENSG00000105639	JAK3	3718	protein_coding	Nuclear: Adult Only
ENSG00000105642.15_1	0.230589	0.192074	0.577395	1.17336	0.183488	2.02e-08	ENSG00000105642	KCNN1	3780	protein_coding	Nuclear: Adult Only
ENSG00000105650.21_1	0.0432501	0.232271		1.27744	0.299054	0.000303866	ENSG00000105650	PDE4C	729966	protein_coding	Nuclear: Adult Only
ENSG00000105655.18_2	0.466014	0.161523	0.0895097	0.795493	0.272148	0.0181341	ENSG00000105655	ISY1	51477	protein_coding	Nuclear: Adult Only	Schizophrenia (from rare SNVs)
ENSG00000105656.12_2	0.362933	0.194317	0.329056	0.610634	0.244348	0.0492821	ENSG00000105656	ELL	8178	protein_coding	Nuclear: Adult Only
ENSG00000105662.15_1	0.361856	0.171241	0.256288	0.934449	0.236531	0.000902262	ENSG00000105662	CRTC1	23373	protein_coding	Nuclear: Adult Only
ENSG00000105675.8_2	0.0200754	0.0999139		1.483	0.428516	0.00420667	ENSG00000105675	ATP4A	495	protein_coding	Nuclear: Adult Only
ENSG00000105722.9_2	0.395875	0.233447	0.385298	0.581687	0.224052	0.0395515	ENSG00000105722	ERF	2077	protein_coding	Nuclear: Adult Only
ENSG00000105726.16_1	0.186307	0.1677	0.612477	0.739577	0.210715	0.00365308	ENSG00000105726	ATP13A1	57130	protein_coding	Nuclear: Adult Only	Bipolar Affective Disorder (from GWAS)
ENSG00000105792.19_2	-0.0174153	0.250006		0.987014	0.312383	0.00987966	ENSG00000105792	C7orf63	79846	protein_coding	Nuclear: Adult Only
ENSG00000105810.9_1	0.0256205	0.190335	0.970362	0.802129	0.249284	0.00847466	ENSG00000105810	CDK6	1021	protein_coding	Nuclear: Adult Only
ENSG00000106012.17_1	0.297088	0.182719	0.412778	0.727436	0.231897	0.0104497	ENSG00000106012	IQCE	23288	protein_coding	Nuclear: Adult Only
ENSG00000106070.17_2	0.160801	0.158221	0.650859	0.578823	0.180888	0.00887383	ENSG00000106070	GRB10	2887	protein_coding	Nuclear: Adult Only
ENSG00000106077.18_1	-0.298247	0.244798	0.568587	0.822525	0.323177	0.0444118	ENSG00000106077	ABHD11	83451	protein_coding	Nuclear: Adult Only
ENSG00000106123.11_1	0.458875	0.184513	0.168117	0.623381	0.168515	0.00203859	ENSG00000106123	EPHB6	2051	protein_coding	Nuclear: Adult Only	Autism Spectrum Disorder (from SAFARI)
ENSG00000106133.17_1	0.641677	0.249297		1.22411	0.446933	0.0284091	ENSG00000106133	NSUN5P2	260294	transcribed_unprocessed_pseudogene	Nuclear: Adult Only
ENSG00000106327.12_1	0.371024	0.240303	0.436872	0.732783	0.250211	0.0178702	ENSG00000106327	TFR2	7036	protein_coding	Nuclear: Adult Only
ENSG00000106346.11_1	-0.0833202	0.163197	0.846528	0.698526	0.245954	0.0223616	ENSG00000106346	USP42	84132	protein_coding	Nuclear: Adult Only
ENSG00000106348.16_1	0.431272	0.198	0.237493	0.634821	0.182202	0.0039467	ENSG00000106348	IMPDH1	3614	protein_coding	Nuclear: Adult Only
ENSG00000106404.13_1	0.5429	0.218258	0.168117	1.06825	0.425249	0.047789	ENSG00000106404	CLDN15	24146	protein_coding	Nuclear: Adult Only
ENSG00000106459.14_1	0.0357491	0.168778	0.948931	0.584415	0.219702	0.0342127	ENSG00000106459	NRF1	4899	protein_coding	Nuclear: Adult Only
ENSG00000106479.10_2	0.481437	0.182477	0.136364	0.998966	0.220532	0.000115797	ENSG00000106479	ZNF862	643641	protein_coding	Nuclear: Adult Only
ENSG00000106683.14_1	0.219701	0.131731	0.396095	0.953291	0.261459	0.00241608	ENSG00000106683	LIMK1	3984	protein_coding	Nuclear: Adult Only
ENSG00000106948.16_1	0.547857	0.240819	0.21509	0.96569	0.253512	0.00144677	ENSG00000106948	AK	80709	protein_coding	Nuclear: Adult Only
ENSG00000107021.15_1	0.0870213	0.186273	0.862715	0.784171	0.204719	0.00134741	ENSG00000107021	TBC1D13	54662	protein_coding	Nuclear: Adult Only
ENSG00000107077.17_2	0.0134432	0.204374	0.986005	0.745695	0.271853	0.0281316	ENSG00000107077	KDM4C	23081	protein_coding	Nuclear: Adult Only	Autism Spectrum Disorder (from SAFARI)
ENSG00000107130.9_1	0.291448	0.165176	0.365416	1.19608	0.192568	5.2e-08	ENSG00000107130	NCS1	23413	protein_coding	Nuclear: Adult Only
ENSG00000107140.15_1	0.286244	0.173047	0.400819	0.721029	0.272041	0.0349409	ENSG00000107140	TESK1	7016	protein_coding	Nuclear: Adult Only
ENSG00000107147.12_2	0.581671	0.241999	0.185169	1.62056	0.240079	2.86e-09	ENSG00000107147	KCNT1	57582	protein_coding	Nuclear: Adult Only
ENSG00000107263.18_1	0.210762	0.154015	0.504629	0.837702	0.301755	0.0260303	ENSG00000107263	RAPGEF1	2889	protein_coding	Nuclear: Adult Only
ENSG00000107551.20_2	0.147775	0.215892	0.786995	0.883913	0.193181	9.96e-05	ENSG00000107551	RASSF4	83937	protein_coding	Nuclear: Adult Only
ENSG00000107719.8_1	0.449235	0.24824	0.347639	0.925819	0.255076	0.00253636	ENSG00000107719	PALD1	27143	protein_coding	Nuclear: Adult Only
ENSG00000107863.17_2	0.0342943	0.120223	0.924239	0.701774	0.262061	0.0329129	ENSG00000107863	ARHGAP21	57584	protein_coding	Nuclear: Adult Only
ENSG00000107954.10_2	0.394929	0.191702	0.268738	1.01463	0.215379	5.85e-05	ENSG00000107954	NEURL1	9148	protein_coding	Nuclear: Adult Only
ENSG00000107957.16_2	0.454363	0.162632	0.104078	0.640746	0.237851	0.031604	ENSG00000107957	SH3PXD2A	9644	protein_coding	Nuclear: Adult Only
ENSG00000108021.19_2	-0.0761536	0.132843	0.825231	0.713758	0.262302	0.0297183	ENSG00000108021	FAM208B	54906	protein_coding	Nuclear: Adult Only
ENSG00000108219.14_1	-0.162734	0.162145	0.656735	0.532525	0.190193	0.0246153	ENSG00000108219	TSPAN14	81619	protein_coding	Nuclear: Adult Only
ENSG00000108262.15_2	0.324773	0.160622	0.279587	0.91424	0.199925	0.00010025	ENSG00000108262	GIT1	28964	protein_coding	Nuclear: Adult Only
ENSG00000108352.11_2	0.23698	0.191064	0.561163	0.810569	0.216578	0.00179111	ENSG00000108352	RAPGEFL1	51195	protein_coding	Nuclear: Adult Only
ENSG00000108465.14_2	0.342616	0.198728	0.376576	1.29358	0.291534	0.000165145	ENSG00000108465	CDK5RAP3	80279	protein_coding	Nuclear: Adult Only
ENSG00000108469.14_2	0.392296	0.187879	0.26129	0.898237	0.219069	0.000544523	ENSG00000108469	RECQL5	9400	protein_coding	Nuclear: Adult Only
ENSG00000108557.17_2	0.460663	0.18107	0.155208	0.74787	0.293418	0.0440214	ENSG00000108557	RAI1	10743	protein_coding	Nuclear: Adult Only
ENSG00000108604.15_2	0.457223	0.212515	0.245118	0.704642	0.233702	0.0143966	ENSG00000108604	SMARCD2	6603	protein_coding	Nuclear: Adult Only
ENSG00000108669.16_2	0.531932	0.189663	0.101944	0.726611	0.16862	0.000266568	ENSG00000108669	CYTH1	9267	protein_coding	Nuclear: Adult Only	Schizophrenia (from rare SNVs)
ENSG00000108773.10_2	0.435642	0.171082	0.155208	1.43246	0.224009	2.02e-08	ENSG00000108773	KAT2A	2648	protein_coding	Nuclear: Adult Only
ENSG00000108819.10_1	0.214932	0.166947	0.540961	0.632903	0.245947	0.0416066	ENSG00000108819	PPP1R9B	84687	protein_coding	Nuclear: Adult Only
ENSG00000108840.15_2	0.34947	0.188886	0.333065	0.907496	0.190202	4.67e-05	ENSG00000108840	HDAC5	10014	protein_coding	Nuclear: Adult Only	Bipolar Affective Disorder (from GWAS)
ENSG00000108846.15_1	0.0356341	0.0967188		1.79586	0.429389	0.000414685	ENSG00000108846	ABCC3	8714	protein_coding	Nuclear: Adult Only
ENSG00000108848.15_2	0.0837785	0.143477	0.821107	0.836314	0.239893	0.00392224	ENSG00000108848	LUC7L3	51747	protein_coding	Nuclear: Adult Only
ENSG00000108963.17_2	0.240519	0.191084	0.553552	0.894704	0.315727	0.0227006	ENSG00000108963	DPH1	1801	protein_coding	Nuclear: Adult Only
ENSG00000109046.14_1	-0.144687	0.195977	0.766152	0.934055	0.270395	0.00428161	ENSG00000109046	WSB1	26118	protein_coding	Nuclear: Adult Only
ENSG00000109063.14_1	0.0286655	0.243072		0.98783	0.375899	0.0367567	ENSG00000109063	MYH3	4621	protein_coding	Nuclear: Adult Only
ENSG00000109072.13_2	0.337233	0.245954		1.43244	0.36946	0.00115609	ENSG00000109072	VTN	645832	protein_coding	Nuclear: Adult Only
ENSG00000109083.13_2	-0.0891823	0.187353	0.859722	0.717861	0.245628	0.0181409	ENSG00000109083	IFT20	90410	protein_coding	Nuclear: Adult Only
ENSG00000109089.7_1	0.377909	0.182492	0.26558	0.83703	0.214817	0.00108311	ENSG00000109089	CDR2L	30850	protein_coding	Nuclear: Adult Only
ENSG00000109103.11_2	0.576853	0.182649	0.0532733	0.621942	0.184076	0.00534529	ENSG00000109103	UNC119	9094	protein_coding	Nuclear: Adult Only
ENSG00000109771.15_1	0.467844	0.229671	0.275438	0.692516	0.260168	0.0340742	ENSG00000109771	LRP2BP	55805	protein_coding	Nuclear: Adult Only
ENSG00000109920.12_2	-0.149468	0.153211	0.671421	0.939943	0.257961	0.00243177	ENSG00000109920	FNBP4	23360	protein_coding	Nuclear: Adult Only
ENSG00000109956.12_1	0.343876	0.2042	0.390066	0.945432	0.206045	9.51e-05	ENSG00000109956	B3GAT1	27087	protein_coding	Nuclear: Adult Only
ENSG00000110042.7_1	0.25486	0.147798	0.376576	0.83217	0.200951	0.000474013	ENSG00000110042	DTX4	23220	protein_coding	Nuclear: Adult Only
ENSG00000110046.12_1	0.461453	0.185375	0.168117	0.591907	0.195136	0.0137612	ENSG00000110046	ATG2A	23130	protein_coding	Nuclear: Adult Only
ENSG00000110075.14_2	0.25486	0.137479	0.332059	0.523791	0.193394	0.0306033	ENSG00000110075	PPP6R3	55291	protein_coding	Nuclear: Adult Only
ENSG00000110455.13_2	0.199212	0.249911		0.947206	0.370704	0.0434208	ENSG00000110455	ACCS	84680	protein_coding	Nuclear: Adult Only
ENSG00000110583.12_1	0.0315439	0.173508	0.956332	0.696907	0.22385	0.0111118	ENSG00000110583	A40	79829	protein_coding	Nuclear: Adult Only
ENSG00000110697.12_1	0.335035	0.171008	0.301647	1.27222	0.207344	7.75e-08	ENSG00000110697	PITPNM1	9600	protein_coding	Nuclear: Adult Only	Schizophrenia (from rare SNVs)
ENSG00000110721.11_1	0.189412	0.166092	0.602778	0.81562	0.290271	0.0240064	ENSG00000110721	CHKA	1119	protein_coding	Nuclear: Adult Only
ENSG00000110723.11_2	0.0640226	0.154859		0.990793	0.350605	0.0231206	ENSG00000110723	EXPH5	23086	protein_coding	Nuclear: Adult Only
ENSG00000110844.13_2	0.214898	0.189481	0.604426	0.971635	0.334665	0.0190385	ENSG00000110844	PRPF40B	25766	protein_coding	Nuclear: Adult Only
ENSG00000110888.17_2	0.245821	0.228489	0.628022	0.752443	0.243912	0.0120159	ENSG00000110888	CAPRIN2	65981	protein_coding	Nuclear: Adult Only
ENSG00000111077.17_1	0.48743	0.182984	0.130095	1.4205	0.199886	3.82e-10	ENSG00000111077	TENC1	23371	protein_coding	Nuclear: Adult Only
ENSG00000111181.12_1	-0.0263158	0.24772		0.928585	0.294511	0.0100539	ENSG00000111181	SLC6A12	6539	protein_coding	Nuclear: Adult Only
ENSG00000111252.10_1	0.14202	0.209039	0.788711	0.699064	0.220508	0.00959436	ENSG00000111252	SH2B3	10019	protein_coding	Nuclear: Adult Only
ENSG00000111271.14_2	0.339797	0.17965	0.322057	0.583443	0.228824	0.0439351	ENSG00000111271	ACAD10	80724	protein_coding	Nuclear: Adult Only
ENSG00000111300.9_2	-0.00958299	0.154644	0.986943	0.605136	0.219519	0.0272775	ENSG00000111300	A25	80018	protein_coding	Nuclear: Adult Only
ENSG00000111325.16_2	0.289066	0.237256		1.38759	0.498605	0.0256466	ENSG00000111325	OGFOD2	79676	protein_coding	Nuclear: Adult Only	Neurodegenerative Disorder
ENSG00000111665.11_1	0.175361	0.248471	0.778161	1.6124	0.328769	2.74e-05	ENSG00000111665	CDCA3	83461	protein_coding	Nuclear: Adult Only
ENSG00000111752.10_1	0.198516	0.162047	0.56696	1.35026	0.322399	0.000406132	ENSG00000111752	PHC1	1911	protein_coding	Nuclear: Adult Only
ENSG00000111788.10_1	0.284593	0.250182		1.73318	0.489275	0.00331229	ENSG00000111788			unprocessed_pseudogene	Nuclear: Adult Only
ENSG00000111799.20_1	0.430059	0.224018	0.312967	0.825481	0.281407	0.0176646	ENSG00000111799	COL12A1	1303	protein_coding	Nuclear: Adult Only
ENSG00000111860.13_2	0.395715	0.188647	0.258998	0.862565	0.322494	0.0331276	ENSG00000111860	CEP85L	387119	protein_coding	Nuclear: Adult Only
ENSG00000112033.13_1	0.375745	0.212618	0.364167	0.838884	0.256023	0.00721705	ENSG00000112033	PPARD	5467	protein_coding	Nuclear: Adult Only
ENSG00000112139.14_2	0.392692	0.219499	0.355379	0.845862	0.333772	0.0455607	ENSG00000112139	MDGA1	266727	protein_coding	Nuclear: Adult Only
ENSG00000112159.11_1	0.341049	0.154508	0.232534	0.889775	0.237094	0.0017318	ENSG00000112159	MDN1	23195	protein_coding	Nuclear: Adult Only
ENSG00000112182.14_2	-0.0495106	0.155224	0.91435	0.859334	0.321771	0.0334307	ENSG00000112182	BACH2	60468	protein_coding	Nuclear: Adult Only
ENSG00000112280.15_1	0.205866	0.239989	0.72073	1.30805	0.287232	0.000106908	ENSG00000112280	COL9A1	1297	protein_coding	Nuclear: Adult Only
ENSG00000112282.17_1	0.171625	0.141074	0.570036	0.797037	0.244225	0.00747669	ENSG00000112282	MED23	9439	protein_coding	Nuclear: Adult Only
ENSG00000112541.9	0.0749088	0.148634	0.848702	0.794565	0.235317	0.00537773	ENSG00000112541	PDE10A	10846	protein_coding	Nuclear: Adult Only
ENSG00000112655.15_2	0.596135	0.22886	0.141677	1.12265	0.309155	0.00252401	ENSG00000112655	PTK7	5754	protein_coding	Nuclear: Adult Only	Autism Spectrum Disorder (from SAFARI)
ENSG00000112658.7_1	0.41793	0.157064	0.130541	0.707293	0.203195	0.0039834	ENSG00000112658	SRF	6722	protein_coding	Nuclear: Adult Only
ENSG00000112659.13_2	0.496463	0.186746	0.130867	1.19866	0.176379	2.32e-09	ENSG00000112659	CUL9	23113	protein_coding	Nuclear: Adult Only
ENSG00000112759.16_1	0.131761	0.207338	0.803541	0.646911	0.218031	0.0162295	ENSG00000112759	SLC29A1	2030	protein_coding	Nuclear: Adult Only
ENSG00000112761.19_2	0.0425709	0.157243		1.4747	0.513321	0.0205965	ENSG00000112761	WISP3	8838	protein_coding	Nuclear: Adult Only
ENSG00000112787.12_2	0.498375	0.169151	0.0801422	1.20651	0.206025	3.39e-07	ENSG00000112787	FBRSL1	57666	protein_coding	Nuclear: Adult Only
ENSG00000112837.16_2	0.147497	0.172561	0.721845	1.27543	0.41343	0.0120155	ENSG00000112837	TBX18	9096	protein_coding	Nuclear: Adult Only
ENSG00000112893.9_1	0.226902	0.214227	0.63533	0.884022	0.282118	0.0105311	ENSG00000112893	MAN2A1	4124	protein_coding	Nuclear: Adult Only
ENSG00000112941.13_2	0.32516	0.153963	0.25656	0.466411	0.184812	0.0465396	ENSG00000112941	PAPD7	11044	protein_coding	Nuclear: Adult Only
ENSG00000113240.12_1	0.125369	0.175444	0.77501	0.979919	0.250684	0.00103798	ENSG00000113240	CLK4	57396	protein_coding	Nuclear: Adult Only
ENSG00000113356.11_2	0.306594	0.249814		1.39469	0.347776	0.000734382	ENSG00000113356	POLR3G	10622	protein_coding	Nuclear: Adult Only
ENSG00000113504.20_2	0.286247	0.249951	0.600401	1.23087	0.289167	0.000318614	ENSG00000113504	SLC12A7	10723	protein_coding	Nuclear: Adult Only
ENSG00000113721.13_1	0.1743	0.217655	0.741683	1.13394	0.296743	0.00138977	ENSG00000113721	PDGFRB	5159	protein_coding	Nuclear: Adult Only
ENSG00000113763.10_2	0.450799	0.192194	0.198747	0.643781	0.20159	0.0090022	ENSG00000113763	UNC5A	90249	protein_coding	Nuclear: Adult Only
ENSG00000113971.18_2	0.279588	0.240889		1.09544	0.298654	0.00224979	ENSG00000113971	NPHP3	27031	protein_coding	Nuclear: Adult Only
ENSG00000114126.17_2	-0.00313047	0.209384	0.997393	0.676108	0.206532	0.00727983	ENSG00000114126	TFDP2	7029	protein_coding	Nuclear: Adult Only
ENSG00000114127.10_2	0.120578	0.171283	0.778952	0.962602	0.234238	0.000529606	ENSG00000114127	XRN1	54464	protein_coding	Nuclear: Adult Only
ENSG00000114554.11_1	0.404404	0.206964	0.30331	0.850998	0.253306	0.00564397	ENSG00000114554	PLX1	5361	protein_coding	Nuclear: Adult Only
ENSG00000114770.16_1	0.427364	0.190979	0.224771	0.665643	0.207074	0.00854249	ENSG00000114770	ABCC5	10057	protein_coding	Nuclear: Adult Only
ENSG00000114812.12_1	0.0196162	0.197423		0.637458	0.206279	0.0118326	ENSG00000114812	VIPR1	7433	protein_coding	Nuclear: Adult Only
ENSG00000114841.17_2	0.468156	0.240207	0.304592	1.69299	0.351018	3.78e-05	ENSG00000114841	DH1	25981	protein_coding	Nuclear: Adult Only	Neurodegenerative Disorder
ENSG00000114853.13_1	0.436359	0.177756	0.174744	0.848863	0.281687	0.0144519	ENSG00000114853	ZBTB47	92999	protein_coding	Nuclear: Adult Only
ENSG00000114857.17_1	0.328797	0.188166	0.370039	0.80785	0.296207	0.0292326	ENSG00000114857	NKTR	4820	protein_coding	Nuclear: Adult Only
ENSG00000114859.15_2	0.390346	0.214523	0.344622	1.13643	0.30404	0.00181598	ENSG00000114859	CLCN2	1181	protein_coding	Nuclear: Adult Only
ENSG00000114923.16_2	0.478803	0.191218	0.163402	0.67594	0.214603	0.0101303	ENSG00000114923	SLC4A3	6508	protein_coding	Nuclear: Adult Only
ENSG00000115041.12_1	0.535482	0.216168	0.169253	0.869799	0.245721	0.00333544	ENSG00000115041	KCNIP3	30818	protein_coding	Nuclear: Adult Only
ENSG00000115085.13_1	0.342955	0.213331		1.62521	0.517874	0.01042	ENSG00000115085	ZAP70	7535	protein_coding	Nuclear: Adult Only
ENSG00000115155.16_1	0.176011	0.184925		1.15566	0.406827	0.0223311	ENSG00000115155	OTOF	9381	protein_coding	Nuclear: Adult Only
ENSG00000115257.11	0.502939	0.245373	0.271429	1.48682	0.285929	7.71e-06	ENSG00000115257	PCSK4	54760	protein_coding	Nuclear: Adult Only
ENSG00000115266.11_2	0.471029	0.189594	0.168544	1.555	0.257603	1.33e-07	ENSG00000115266	APC2	10297	protein_coding	Nuclear: Adult Only
ENSG00000115274.14_2	0.481763	0.247209		1.58208	0.480701	0.00692029	ENSG00000115274	INO80B	83444	protein_coding	Nuclear: Adult Only
ENSG00000115275.11_2	0.262298	0.165036	0.423086	0.799233	0.243729	0.00716435	ENSG00000115275	MOGS	7841	protein_coding	Nuclear: Adult Only
ENSG00000115282.19_1	0.490237	0.179376	0.115849	1.08309	0.291129	0.00191041	ENSG00000115282	TTC31	64427	protein_coding	Nuclear: Adult Only
ENSG00000115307.16_1	0.0295297	0.151876	0.952706	0.614147	0.235916	0.0388828	ENSG00000115307	AUP1	550	protein_coding	Nuclear: Adult Only
ENSG00000115339.13_2	0.253341	0.246108		1.07383	0.387572	0.026344	ENSG00000115339	GALNT3	2591	protein_coding	Nuclear: Adult Only
ENSG00000115355.15_1	-0.0253427	0.157867	0.964237	0.69846	0.221034	0.0098781	ENSG00000115355	CCDC88A	55704	protein_coding	Nuclear: Adult Only
ENSG00000115423.18_2	-0.10724	0.249797		0.770151	0.304229	0.0457907	ENSG00000115423	DH6	1768	protein_coding	Nuclear: Adult Only	Schizophrenia (from rare SNVs)
ENSG00000115459.17_1	0.107933	0.190659	0.827652	0.625702	0.240643	0.0391927	ENSG00000115459	ELMOD3	84173	protein_coding	Nuclear: Adult Only
ENSG00000115556.13_1	0.389935	0.244323		0.921713	0.369761	0.0499617	ENSG00000115556	PLCD4	84812	protein_coding	Nuclear: Adult Only
ENSG00000115657.12_2	0.366843	0.240284	0.444071	1.30434	0.300611	0.000238365	ENSG00000115657	ABCB6	10058	protein_coding	Nuclear: Adult Only
ENSG00000115687.13_1	0.329707	0.205476	0.418387	1.11168	0.263741	0.000370592	ENSG00000115687	PASK	23178	protein_coding	Nuclear: Adult Only
ENSG00000115760.13_2	0.126941	0.133997	0.683283	0.601229	0.21883	0.0278502	ENSG00000115760	BIRC6	57448	protein_coding	Nuclear: Adult Only	Autism Spectrum Disorder (from SAFARI)
ENSG00000116001.15_2	0.326933	0.144758	0.218686	1.17519	0.256823	9.95e-05	ENSG00000116001	TIA1	7072	protein_coding	Nuclear: Adult Only
ENSG00000116017.6	0.378792	0.234794	0.416832	1.03291	0.343726	0.014729	ENSG00000116017	ARID3A	1820	protein_coding	Nuclear: Adult Only
ENSG00000116032.5_1	0.80101	0.234179		1.39245	0.515826	0.0312224	ENSG00000116032	GRIN3B	116444	protein_coding	Nuclear: Adult Only
ENSG00000116213.15_1	0.380131	0.179891	0.256288	0.807711	0.239139	0.0053611	ENSG00000116213	WRAP73	49856	protein_coding	Nuclear: Adult Only
ENSG00000116254.17_1	0.393214	0.217694	0.34851	1.10589	0.210107	5.79e-06	ENSG00000116254	CHD5	101928723	protein_coding	Nuclear: Adult Only	Autism Spectrum Disorder (from SAFARI)
ENSG00000116329.10_1	0.174947	0.188356		0.717452	0.27786	0.0408075	ENSG00000116329	OPRD1	4985	protein_coding	Nuclear: Adult Only
ENSG00000116337.15_2	0.339493	0.169922	0.287054	0.756351	0.192487	0.000969576	ENSG00000116337	AMPD2	271	protein_coding	Nuclear: Adult Only
ENSG00000116396.14_2	0.41564	0.228302	0.344452	0.714862	0.199545	0.00293379	ENSG00000116396	KCNC4	3749	protein_coding	Nuclear: Adult Only
ENSG00000116544.11_1	0.331993	0.187655	0.363356	0.981788	0.302755	0.00788913	ENSG00000116544	DLGAP3	58512	protein_coding	Nuclear: Adult Only	Autism Spectrum Disorder (from SAFARI)
ENSG00000116754.13_1	0.1781	0.14036	0.548569	0.645051	0.221588	0.0186582	ENSG00000116754	SRSF11	9295	protein_coding	Nuclear: Adult Only	Autism Spectrum Disorder (from SAFARI)
ENSG00000116786.11_2	0.495168	0.161631	0.0630266	0.734853	0.204434	0.00281926	ENSG00000116786	PLEKHM2	23207	protein_coding	Nuclear: Adult Only
ENSG00000116819.6_1	0.362925	0.249602		0.962279	0.304532	0.00987828	ENSG00000116819	TFAP2E	339488	protein_coding	Nuclear: Adult Only
ENSG00000116852.14_1	0.417636	0.182725	0.212293	0.983234	0.29066	0.00528631	ENSG00000116852	KIF21B	101929275	protein_coding	Nuclear: Adult Only	Autism Spectrum Disorder (from SAFARI)
ENSG00000116883.8_2	0.465077	0.247149		1.74063	0.281216	5.81e-08	ENSG00000116883			antisense	Nuclear: Adult Only
ENSG00000116984.12_2	0.253777	0.178689	0.484586	0.78941	0.221245	0.00306125	ENSG00000116984	MTR	4548	protein_coding	Nuclear: Adult Only	Autism Spectrum Disorder (from SAFARI)
ENSG00000117000.8_1	-0.112277	0.142588	0.747399	0.68281	0.223213	0.0128599	ENSG00000117000	RLF	6018	protein_coding	Nuclear: Adult Only
ENSG00000117013.14_1	0.044006	0.242567		1.00946	0.272446	0.00200198	ENSG00000117013	KCNQ4	9132	protein_coding	Nuclear: Adult Only
ENSG00000117016.9_1	0.616481	0.209355	0.0804109	0.788093	0.252694	0.0109642	ENSG00000117016	RIMS3	9783	protein_coding	Nuclear: Adult Only	Autism Spectrum Disorder (from SAFARI)
ENSG00000117266.15_2	0.175027	0.238718		1.00209	0.204501	2.79e-05	ENSG00000117266	CDK18	5129	protein_coding	Nuclear: Adult Only
ENSG00000117411.16_1	0.328645	0.160934	0.274088	0.943314	0.205348	9.31e-05	ENSG00000117411	B4GALT2	8704	protein_coding	Nuclear: Adult Only
ENSG00000117425.13_1	0.464586	0.198041	0.198726	1.4144	0.293225	3.78e-05	ENSG00000117425	PTCH2	8643	protein_coding	Nuclear: Adult Only
ENSG00000117479.12_2	0.057144	0.194387	0.921884	0.6743	0.243739	0.0266078	ENSG00000117479	SLC19A2	10560	protein_coding	Nuclear: Adult Only	Schizophrenia (from rare SNVs)
ENSG00000117616.17_2	-0.23123	0.164638	0.490099	1.15973	0.215901	3.58e-06	ENSG00000117616	C1orf63	101928189	protein_coding	Nuclear: Adult Only
ENSG00000118058.20_2	0.261861	0.154202	0.384456	0.800479	0.190863	0.000399298	ENSG00000118058	KMT2A	4297	protein_coding	Nuclear: Adult Only
ENSG00000118495.18_1	0.37682	0.160327	0.197939	1.00683	0.277195	0.00251924	ENSG00000118495	PLAGL1	5325	protein_coding	Nuclear: Adult Only
ENSG00000118762.7_1	0.350883	0.181672	0.310191	0.824812	0.237767	0.00411353	ENSG00000118762	PKD2	5311	protein_coding	Nuclear: Adult Only
ENSG00000119397.16_1	0.184717	0.17149	0.627199	0.919565	0.302036	0.013367	ENSG00000119397	CNTRL	11064	protein_coding	Nuclear: Adult Only
ENSG00000119403.13_2	0.313949	0.243623	0.540343	0.772881	0.237129	0.00754906	ENSG00000119403	PHF19	26147	protein_coding	Nuclear: Adult Only
ENSG00000119522.16_2	0.00172721	0.146389	0.998157	0.637685	0.243033	0.0370752	ENSG00000119522	DENND1A	57706	protein_coding	Nuclear: Adult Only
ENSG00000119547.5_2	0.435055	0.236317	0.337125	1.12875	0.370346	0.0132517	ENSG00000119547	ONECUT2	9480	protein_coding	Nuclear: Adult Only
ENSG00000119574.12_1	-0.0659588	0.162335	0.887033	0.576792	0.196405	0.017521	ENSG00000119574	ZBTB45	84878	protein_coding	Nuclear: Adult Only
ENSG00000119772.16_1	0.377667	0.148468	0.155208	1.148	0.271296	0.000348621	ENSG00000119772	DNMT3A	1788	protein_coding	Nuclear: Adult Only
ENSG00000119943.11_2	0.315515	0.237949		1.0701	0.349237	0.0126913	ENSG00000119943	PYROXD2	84795	protein_coding	Nuclear: Adult Only
ENSG00000120049.18_1	0.393043	0.209827	0.328047	0.711514	0.210488	0.00532313	ENSG00000120049	KCNIP2	30819	protein_coding	Nuclear: Adult Only
ENSG00000120318.15_1	0.407822	0.239802	0.383677	1.26142	0.269435	6.52e-05	ENSG00000120318	ARAP3	64411	protein_coding	Nuclear: Adult Only
ENSG00000120458.10_1	0.263656	0.187759	0.490101	0.790976	0.279821	0.0230774	ENSG00000120458	MSANTD2	79684	protein_coding	Nuclear: Adult Only	Autism Spectrum Disorder (from SAFARI)
ENSG00000120645.11_1	0.415297	0.218129	0.317241	1.15297	0.261279	0.000180769	ENSG00000120645	IQSEC3	100996825	protein_coding	Nuclear: Adult Only
ENSG00000120693.13_2	0.198201	0.176141	0.606587	0.787747	0.264118	0.0156114	ENSG00000120693	SMAD9	4093	protein_coding	Nuclear: Adult Only
ENSG00000120709.10_1	0.0762478	0.142884	0.837757	0.726911	0.259421	0.0244982	ENSG00000120709	FAM53C	51307	protein_coding	Nuclear: Adult Only
ENSG00000120798.16_2	0.0354859	0.167183	0.948744	0.818385	0.28935	0.0229846	ENSG00000120798	NR2C1	7181	protein_coding	Nuclear: Adult Only
ENSG00000121053.5_1	0.0205319	0.242906		1.42923	0.476782	0.0149905	ENSG00000121053	EPX	8288	protein_coding	Nuclear: Adult Only
ENSG00000121068.13_1	0.509227	0.241448		1.14493	0.358431	0.00898118	ENSG00000121068	TBX2	6909	protein_coding	Nuclear: Adult Only
ENSG00000121289.17_1	-0.0101827	0.132277	0.98219	0.666887	0.22661	0.0172671	ENSG00000121289	CEP89	84902	protein_coding	Nuclear: Adult Only
ENSG00000121310.16_2	0.382169	0.249849		0.957848	0.338694	0.0229992	ENSG00000121310	ECHDC2	55268	protein_coding	Nuclear: Adult Only
ENSG00000121417.13_1	0.167467	0.177578	0.685352	0.744904	0.258465	0.0200899	ENSG00000121417	ZNF211	10520	protein_coding	Nuclear: Adult Only
ENSG00000121653.11_1	0.165465	0.154553	0.62995	0.77177	0.233502	0.00665677	ENSG00000121653	MAPK8IP1	9479	protein_coding	Nuclear: Adult Only
ENSG00000121716.19_2	0.301617	0.227613		1.78264	0.481466	0.00201656	ENSG00000121716	PILRB	102466747	protein_coding	Nuclear: Adult Only	Neurodegenerative Disorder
ENSG00000121753.12_2	0.534735	0.174343	0.0627691	0.713807	0.17738	0.000702678	ENSG00000121753	BAI2	576	protein_coding	Nuclear: Adult Only
ENSG00000122390.17_2	0.0152818	0.145906	0.975914	0.491632	0.194165	0.0457591	ENSG00000122390	A60	79903	protein_coding	Nuclear: Adult Only
ENSG00000122435.9_1	0.547389	0.200488	0.11617	0.927359	0.363028	0.0434729	ENSG00000122435	TRMT13	54482	protein_coding	Nuclear: Adult Only
ENSG00000122490.18_1	0.393085	0.170612	0.20838	0.767713	0.225048	0.00487585	ENSG00000122490	PQLC1	80148	protein_coding	Nuclear: Adult Only
ENSG00000122515.14_2	0.17182	0.14533	0.585543	1.02074	0.221698	8.93e-05	ENSG00000122515	ZMIZ2	83637	protein_coding	Nuclear: Adult Only
ENSG00000122678.15_2	0.355926	0.214083	0.397619	0.788201	0.315613	0.0494403	ENSG00000122678	POLM	27434	protein_coding	Nuclear: Adult Only
ENSG00000122966.14_2	0.296499	0.219014	0.510326	0.562582	0.218785	0.0418187	ENSG00000122966	CIT	100302274	protein_coding	Nuclear: Adult Only	Schizophrenia (from rare SNVs)
ENSG00000123066.7_2	0.194671	0.176938	0.616798	0.69742	0.227248	0.0125296	ENSG00000123066	MED13L	23389	protein_coding	Nuclear: Adult Only
ENSG00000123552.17_1	0.18078	0.23889		0.623641	0.239077	0.0383663	ENSG00000123552	USP45	85015	protein_coding	Nuclear: Adult Only	Autism Spectrum Disorder (from SAFARI)
ENSG00000123636.17_2	0.0953416	0.149235	0.803018	0.83024	0.245887	0.00537773	ENSG00000123636	BAZ2B	29994	protein_coding	Nuclear: Adult Only	Autism Spectrum Disorder (from SAFARI)
ENSG00000123999.4_1	0.255947	0.225751		1.20437	0.397766	0.0139323	ENSG00000123999	INHA	3623	protein_coding	Nuclear: Adult Only
ENSG00000124181.14_2	0.220466	0.139022	0.424212	0.810198	0.313697	0.0407465	ENSG00000124181	PLCG1	5335	protein_coding	Nuclear: Adult Only
ENSG00000124203.6_2				1.45673	0.325823	0.000145573	ENSG00000124203	ZNF831	128611	protein_coding	Nuclear: Adult Only
ENSG00000124222.22_2	0.0579687	0.180127	0.913383	0.504823	0.19338	0.0381876	ENSG00000124222	STX16	8675	protein_coding	Nuclear: Adult Only
ENSG00000124313.12_1	0.175753	0.17595	0.659341	0.963981	0.284437	0.00518701	ENSG00000124313	IQSEC2	23096	protein_coding	Nuclear: Adult Only
ENSG00000124496.12_1	0.36347	0.206403	0.365609	0.724418	0.268769	0.0315084	ENSG00000124496	TRERF1	55809	protein_coding	Nuclear: Adult Only
ENSG00000124574.14_2	0.291398	0.184209	0.425748	1.37679	0.274809	1.79e-05	ENSG00000124574	ABCC10	89845	protein_coding	Nuclear: Adult Only
ENSG00000124587.13_1	0.427503	0.210827	0.277611	0.957266	0.208563	9.46e-05	ENSG00000124587	PEX6	5190	protein_coding	Nuclear: Adult Only
ENSG00000124593.14_2	0.746431	0.240459	0.0579829	1.46675	0.384978	0.00144347	ENSG00000124593	PRICKLE4	100188893	protein_coding	Nuclear: Adult Only
ENSG00000124749.16_2	0.334937	0.224632		0.863452	0.342852	0.0470733	ENSG00000124749	COL21A1	81578	protein_coding	Nuclear: Adult Only
ENSG00000124786.9_1	0.0290081	0.189268	0.965847	0.613598	0.228532	0.032297	ENSG00000124786	SLC35B3	51000	protein_coding	Nuclear: Adult Only
ENSG00000124788.17_2	0.195698	0.201626	0.672926	0.648414	0.191754	0.00530452	ENSG00000124788	ATXN1	6310	protein_coding	Nuclear: Adult Only
ENSG00000124813.20_1	0.211815	0.241289		0.955376	0.351647	0.0300321	ENSG00000124813	RUNX2	860	protein_coding	Nuclear: Adult Only
ENSG00000125084.11_1	0.0787611	0.117705		1.28233	0.451602	0.0223885	ENSG00000125084	WNT1	7471	protein_coding	Nuclear: Adult Only	Autism Spectrum Disorder (from SAFARI)
ENSG00000125170.10_2	0.201944	0.166105	0.570443	0.660843	0.243288	0.030065	ENSG00000125170	DOK4	55715	protein_coding	Nuclear: Adult Only
ENSG00000125637.15_1	0.110287	0.248653		0.792813	0.290631	0.0291952	ENSG00000125637	PSD4	23550	protein_coding	Nuclear: Adult Only
ENSG00000125648.14_2	-0.0591848	0.121917	0.856417	0.65328	0.220095	0.0161807	ENSG00000125648	SLC25A23	79085	protein_coding	Nuclear: Adult Only
ENSG00000125734.14_2	0.252772	0.229286	0.616619	0.576833	0.218379	0.0356385	ENSG00000125734	GPR108	102465474	protein_coding	Nuclear: Adult Only
ENSG00000125744.11_1	0.284517	0.161414	0.365522	0.595922	0.181034	0.00691142	ENSG00000125744	RTN2	6253	protein_coding	Nuclear: Adult Only
ENSG00000125755.18_2	0.402289	0.156141	0.14847	0.468545	0.166151	0.023485	ENSG00000125755	SYMPK	8189	protein_coding	Nuclear: Adult Only
ENSG00000125834.12_1	0.307824	0.15789	0.304566	0.859672	0.215725	0.00080015	ENSG00000125834	STK35	140901	protein_coding	Nuclear: Adult Only
ENSG00000125966.9_1	0.306098	0.184532	0.39889	0.964637	0.376239	0.0425435	ENSG00000125966	MMP24	10893	protein_coding	Nuclear: Adult Only
ENSG00000125967.16_1	0.333845	0.197921	0.389199	0.557436	0.185667	0.0148158	ENSG00000125967	NECAB3	63941	protein_coding	Nuclear: Adult Only
ENSG00000126003.6_1	0.0972925	0.200441	0.856417	0.835591	0.28591	0.0181409	ENSG00000126003	PLAGL2	5326	protein_coding	Nuclear: Adult Only
ENSG00000126070.19_1	0.263352	0.160548	0.406248	0.626872	0.230849	0.0301224	ENSG00000126070	AGO3	192669	protein_coding	Nuclear: Adult Only	Autism Spectrum Disorder (from SAFARI)
ENSG00000126215.13_1	0.562776	0.230014	0.176395	1.08584	0.305068	0.00314556	ENSG00000126215	XRCC3	7517	protein_coding	Nuclear: Adult Only
ENSG00000126217.20_2	0.438168	0.165349	0.133317	1.0954	0.19459	1.01e-06	ENSG00000126217	MCF2L	23263	protein_coding	Nuclear: Adult Only
ENSG00000126391.13_1	0.294269	0.216449	0.508605	1.0122	0.224236	0.000123177	ENSG00000126391	FRMD8	83786	protein_coding	Nuclear: Adult Only
ENSG00000126759.12_2	0.287829	0.244468		1.09959	0.423758	0.0396532	ENSG00000126759	CFP	5199	protein_coding	Nuclear: Adult Only
ENSG00000126767.17_1	0.0179389	0.163916	0.975164	1.48083	0.244219	1.15e-07	ENSG00000126767	ELK1	2002	protein_coding	Nuclear: Adult Only
ENSG00000126790.11_2	0.393073	0.242408		0.875972	0.27216	0.00845226	ENSG00000126790	L3HYPDH	112849	protein_coding	Nuclear: Adult Only
ENSG00000126804.13_2	0.250845	0.18968	0.524988	0.733551	0.233388	0.0102945	ENSG00000126804	ZBTB1	22890	protein_coding	Nuclear: Adult Only
ENSG00000126822.16_2	0.24019	0.204088	0.587842	0.732024	0.264453	0.026513	ENSG00000126822	PLEKHG3	26030	protein_coding	Nuclear: Adult Only
ENSG00000126882.12_1	0.410183	0.250082		0.96713	0.222115	0.000225892	ENSG00000126882	FAM78A	101927137	protein_coding	Nuclear: Adult Only
ENSG00000127054.19_2	0.354587	0.142835	0.168647	0.686558	0.199574	0.00447638	ENSG00000127054	CPSF3L	102465435	protein_coding	Nuclear: Adult Only
ENSG00000127124.14_2	0.428171	0.169336	0.156751	0.918904	0.27059	0.00508778	ENSG00000127124	HIVEP3	59269	protein_coding	Nuclear: Adult Only	Autism Spectrum Disorder (from SAFARI)
ENSG00000127311.9_1	-0.00148687	0.21069	0.999036	1.26167	0.48608	0.0395968	ENSG00000127311	HELB	92797	protein_coding	Nuclear: Adult Only
ENSG00000127334.10_2	-0.0788171	0.124594	0.804421	0.557034	0.21045	0.0352279	ENSG00000127334	DYRK2	8445	protein_coding	Nuclear: Adult Only
ENSG00000127419.16_2	0.342178	0.200139	0.379865	0.99397	0.29453	0.00540986	ENSG00000127419	TMEM175	84286	protein_coding	Nuclear: Adult Only	Neurodegenerative Disorder
ENSG00000127452.8_1	0.320749	0.1993	0.418387	0.686829	0.269074	0.0436818	ENSG00000127452	FBXL12	54850	protein_coding	Nuclear: Adult Only
ENSG00000127511.9_2	0.126878	0.138825	0.699531	0.603872	0.217539	0.0260303	ENSG00000127511	SIN3B	23309	protein_coding	Nuclear: Adult Only
ENSG00000127564.16_2	0.376978	0.249982		1.11678	0.341253	0.00729258	ENSG00000127564	PKMYT1	9088	protein_coding	Nuclear: Adult Only
ENSG00000127585.11_1	0.164457	0.172951	0.682217	0.936619	0.220806	0.000335861	ENSG00000127585	FBXL16	146330	protein_coding	Nuclear: Adult Only
ENSG00000127663.14_2	0.313159	0.148919	0.258398	0.777774	0.178446	0.000222411	ENSG00000127663	KDM4B	23030	protein_coding	Nuclear: Adult Only	Autism Spectrum Disorder (from SAFARI)
ENSG00000127914.16_2	-0.0768422	0.126536	0.812566	0.822107	0.28522	0.0200745	ENSG00000127914	AKAP9	10142	protein_coding	Nuclear: Adult Only	Autism Spectrum Disorder (from SAFARI)
ENSG00000127980.15_1	0.0834676	0.170228	0.853761	0.735738	0.24063	0.0129018	ENSG00000127980	PEX1	5189	protein_coding	Nuclear: Adult Only
ENSG00000128000.15_2	0.189333	0.154782	0.567574	0.654362	0.215692	0.013746	ENSG00000128000	ZNF780B	163131	protein_coding	Nuclear: Adult Only
ENSG00000128268.11_1	0.356185	0.192437	0.332953	0.864029	0.225561	0.00134741	ENSG00000128268	MGAT3	4248	protein_coding	Nuclear: Adult Only
ENSG00000128283.6_2	0.202572	0.242379	0.726938	0.995002	0.266903	0.00187101	ENSG00000128283	CDC42EP1	11135	protein_coding	Nuclear: Adult Only
ENSG00000128482.15_1	0.457828	0.165495	0.109232	0.565893	0.207075	0.0288527	ENSG00000128482	RNF112	7732	protein_coding	Nuclear: Adult Only
ENSG00000128731.15_2	0.329041	0.153682	0.248298	0.66408	0.241277	0.0275321	ENSG00000128731	HERC2	101930157	protein_coding	Nuclear: Adult Only
ENSG00000128833.12_1	0.257766	0.247202		0.894928	0.290804	0.012258	ENSG00000128833	MYO5C	55930	protein_coding	Nuclear: Adult Only	Autism Spectrum Disorder (from SAFARI)
ENSG00000128915.11_2	0.102595	0.190527	0.836304	0.701736	0.22395	0.0105311	ENSG00000128915	RG2	79664	protein_coding	Nuclear: Adult Only
ENSG00000129003.15_2	0.188717	0.148286	0.547369	0.628405	0.202889	0.0116222	ENSG00000129003	VPS13C	54832	protein_coding	Nuclear: Adult Only	Neurodegenerative Disorder
ENSG00000129219.13_1	0.607491	0.195772	0.0579829	0.77073	0.26877	0.0209004	ENSG00000129219	PLD2	5338	protein_coding	Nuclear: Adult Only
ENSG00000129317.14_1	0.375302	0.192539	0.304566	0.797791	0.254089	0.0103777	ENSG00000129317	PUS7L	83448	protein_coding	Nuclear: Adult Only
ENSG00000129467.13_2	0.464672	0.249894		1.22756	0.333734	0.002179	ENSG00000129467	ADCY4	196883	protein_coding	Nuclear: Adult Only
ENSG00000129646.14_2	0.49307	0.192091	0.150222	1.34471	0.31363	0.000288093	ENSG00000129646	QRICH2	84074	protein_coding	Nuclear: Adult Only
ENSG00000129933.20_2	0.24626	0.156601	0.428162	0.772439	0.272615	0.0227072	ENSG00000129933	MAU2	23383	protein_coding	Nuclear: Adult Only	Bipolar Affective Disorder (from GWAS)
ENSG00000130052.13_2	0.321825	0.240679	0.517734	1.10478	0.38726	0.0216461	ENSG00000130052	STARD8	9754	protein_coding	Nuclear: Adult Only
ENSG00000130158.13_1	0.281612	0.24954	0.606042	1.06958	0.314573	0.00502899	ENSG00000130158	DOCK6	57572	protein_coding	Nuclear: Adult Only
ENSG00000130244.12_2	0.570254	0.187566	0.0662014	0.650391	0.23361	0.0255731	ENSG00000130244	FAM98C	147965	protein_coding	Nuclear: Adult Only
ENSG00000130294.14_1	0.140003	0.168265	0.728601	0.982503	0.236374	0.000449575	ENSG00000130294	KIF1A	547	protein_coding	Nuclear: Adult Only
ENSG00000130307.11_2	0.20225	0.244346		0.880166	0.326777	0.0316293	ENSG00000130307	USHBP1	83878	protein_coding	Nuclear: Adult Only
ENSG00000130309.10_2	0.292968	0.142351	0.269125	0.590511	0.217937	0.0305324	ENSG00000130309	COLGALT1	79709	protein_coding	Nuclear: Adult Only
ENSG00000130382.8_2	0.225126	0.140392	0.418497	1.01367	0.208237	3.19e-05	ENSG00000130382	MLLT1	4298	protein_coding	Nuclear: Adult Only
ENSG00000130475.14_1	0.180469	0.197194	0.699531	0.729672	0.229096	0.00920356	ENSG00000130475	FCHO1	23149	protein_coding	Nuclear: Adult Only
ENSG00000130508.10_2	0.363599	0.206486	0.365609	1.49691	0.327826	0.000102589	ENSG00000130508	PXDN	7837	protein_coding	Nuclear: Adult Only	Autism Spectrum Disorder (from SAFARI)
ENSG00000130511.15_1	0.427176	0.167598	0.155208	0.648615	0.215718	0.0146904	ENSG00000130511	SSBP4	170463	protein_coding	Nuclear: Adult Only
ENSG00000130517.13_2	0.267617	0.163172	0.406248	0.668899	0.21967	0.0133569	ENSG00000130517	PGPEP1	54858	protein_coding	Nuclear: Adult Only
ENSG00000130518.16_2	0.375217	0.233548	0.418387	1.10644	0.421972	0.037246	ENSG00000130518	KIAA1683	80726	protein_coding	Nuclear: Adult Only
ENSG00000130529.15_2	0.212088	0.217965	0.671992	0.813308	0.281778	0.0198551	ENSG00000130529	TRPM4	54795	protein_coding	Nuclear: Adult Only
ENSG00000130584.10_1	0.349957	0.193924	0.348978	0.950122	0.251072	0.00156547	ENSG00000130584	ZBTB46	140685	protein_coding	Nuclear: Adult Only
ENSG00000130589.16_1	0.372468	0.248369		1.1699	0.38879	0.0146193	ENSG00000130589	HELZ2	85441	protein_coding	Nuclear: Adult Only
ENSG00000130590.13_2	0.415163	0.185839	0.226126	0.806469	0.217207	0.00195684	ENSG00000130590	SAMD10	140700	protein_coding	Nuclear: Adult Only
ENSG00000130635.15_2	0.141427	0.163015	0.717398	1.58525	0.277538	6.79e-07	ENSG00000130635	COL5A1	1289	protein_coding	Nuclear: Adult Only
ENSG00000130695.13_1	0.146531	0.178722	0.733518	0.770522	0.261986	0.0173449	ENSG00000130695	CEP85	64793	protein_coding	Nuclear: Adult Only
ENSG00000130714.15_1	0.354792	0.186539	0.318027	1.00809	0.220475	0.000100401	ENSG00000130714	POMT1	10585	protein_coding	Nuclear: Adult Only	Autism Spectrum Disorder (from SAFARI)
ENSG00000130734.9_1	0.492537	0.207576	0.192457	0.668085	0.220313	0.0137859	ENSG00000130734	ATG4D	84971	protein_coding	Nuclear: Adult Only
ENSG00000130758.7_2	0.609884	0.196414	0.0579829	1.46711	0.258871	8.48e-07	ENSG00000130758	MAP3K10	4294	protein_coding	Nuclear: Adult Only
ENSG00000130762.14_2	0.186689	0.206414		1.07986	0.399976	0.0312088	ENSG00000130762	ARHGEF16	27237	protein_coding	Nuclear: Adult Only
ENSG00000130787.13_1	0.544723	0.19261	0.0983256	1.08142	0.203871	4.79e-06	ENSG00000130787	HIP1R	9026	protein_coding	Nuclear: Adult Only
ENSG00000130813.17_2	0.0223704	0.244617		0.531783	0.207146	0.0422364	ENSG00000130813	C19orf66	55337	protein_coding	Nuclear: Adult Only
ENSG00000130821.15_2	0.421042	0.178073	0.194499	0.762257	0.196021	0.00111052	ENSG00000130821	SLC6A8	6535	protein_coding	Nuclear: Adult Only
ENSG00000130827.6_1	0.427215	0.175339	0.178672	1.44718	0.219251	6.48e-09	ENSG00000130827	PLX3	55558	protein_coding	Nuclear: Adult Only	Autism Spectrum Disorder (from SAFARI)
ENSG00000130856.15_1	0.327531	0.176265	0.330846	0.73286	0.217871	0.00557051	ENSG00000130856	ZNF236	7776	protein_coding	Nuclear: Adult Only
ENSG00000130881.13_2	0.575911	0.188305	0.0635159	1.36592	0.217239	3.51e-08	ENSG00000130881	LRP3	4037	protein_coding	Nuclear: Adult Only
ENSG00000130948.9_1	-0.00150907	0.0604528		1.10973	0.444115	0.049312	ENSG00000130948	HSD17B3	3293	protein_coding	Nuclear: Adult Only
ENSG00000131023.12_1	-0.0440046	0.148934	0.921352	0.613401	0.227235	0.0312224	ENSG00000131023	LATS1	9113	protein_coding	Nuclear: Adult Only
ENSG00000131149.18_2	0.274863	0.158355	0.372586	0.948889	0.216701	0.00020739	ENSG00000131149	GSE1	23199	protein_coding	Nuclear: Adult Only
ENSG00000131323.14_2	0.368168	0.190162	0.308988	0.998	0.196696	1.36e-05	ENSG00000131323	TRAF3	7187	protein_coding	Nuclear: Adult Only
ENSG00000131375.9_1	-0.14046	0.14628	0.678083	0.507549	0.201642	0.0471866	ENSG00000131375	CAPN7	23473	protein_coding	Nuclear: Adult Only
ENSG00000131446.16_2	0.258508	0.160054	0.416422	0.652075	0.159668	0.000577913	ENSG00000131446	MGAT1	4245	protein_coding	Nuclear: Adult Only
ENSG00000131591.17_1	0.577558	0.199778	0.0888715	1.0738	0.238122	0.000125457	ENSG00000131591	C1orf159	54991	protein_coding	Nuclear: Adult Only
ENSG00000131650.13_1	0.0892785	0.18238		1.47567	0.294753	1.81e-05	ENSG00000131650	KREMEN2	79412	protein_coding	Nuclear: Adult Only
ENSG00000131653.12_2	0.196381	0.128021	0.441247	0.767339	0.202888	0.0015749	ENSG00000131653	TRAF7	84231	protein_coding	Nuclear: Adult Only
ENSG00000131697.17_2	0.635966	0.22341	0.0952671	1.18973	0.22818	7.26e-06	ENSG00000131697	NPHP4	261734	protein_coding	Nuclear: Adult Only
ENSG00000131748.15_2	0.461292	0.169888	0.119021	0.806507	0.20855	0.00119197	ENSG00000131748	STARD3	10948	protein_coding	Nuclear: Adult Only
ENSG00000131797.12_1	0.655892	0.221253	0.0773421	1.31219	0.26262	1.88e-05	ENSG00000131797	CLUHP3	100132341	transcribed_unprocessed_pseudogene	Nuclear: Adult Only
ENSG00000131845.14_1	-0.0704639	0.164398	0.879	0.668125	0.26742	0.0493479	ENSG00000131845	ZNF304	57343	protein_coding	Nuclear: Adult Only
ENSG00000131885.16_1				1.22708	0.371924	0.00677309	ENSG00000131885	KRT17P1		transcribed_unprocessed_pseudogene	Nuclear: Adult Only
ENSG00000131899.10_1	0.360444	0.153012	0.195997	0.730822	0.269847	0.0306033	ENSG00000131899	LLGL1	3996	protein_coding	Nuclear: Adult Only
ENSG00000132005.8_1	0.171375	0.176133	0.671992	0.715109	0.241928	0.0167115	ENSG00000132005	RFX1	5989	protein_coding	Nuclear: Adult Only
ENSG00000132024.17_2	0.0968425	0.177614	0.834325	0.928263	0.215968	0.000276645	ENSG00000132024	CC2D1A	54862	protein_coding	Nuclear: Adult Only	Autism Spectrum Disorder (from SAFARI)
ENSG00000132182.11_1	0.27354	0.171126	0.419722	0.760681	0.300417	0.0457591	ENSG00000132182	NUP210	23225	protein_coding	Nuclear: Adult Only
ENSG00000132199.18_1	0.135158	0.236134		0.87042	0.285833	0.0133551	ENSG00000132199	ENOSF1	55556	protein_coding	Nuclear: Adult Only
ENSG00000132359.14_2	0.328478	0.208845	0.428077	0.710804	0.229473	0.0116155	ENSG00000132359	RAP1GAP2	23108	protein_coding	Nuclear: Adult Only
ENSG00000132361.16_2	0.523002	0.170051	0.0617363	0.515213	0.157468	0.00729809	ENSG00000132361	CLUH	23277	protein_coding	Nuclear: Adult Only
ENSG00000132424.14_1	0.289753	0.156448	0.332645	0.850419	0.258599	0.00696231	ENSG00000132424	PNISR	25957	protein_coding	Nuclear: Adult Only
ENSG00000132510.10_1	0.260047	0.159623	0.411209	1.11326	0.243983	0.000103884	ENSG00000132510	KDM6B	23135	protein_coding	Nuclear: Adult Only	Autism Spectrum Disorder (from SAFARI)
ENSG00000132522.15_2	0.143464	0.237697	0.814146	1.50882	0.379661	0.000832875	ENSG00000132522	GPS2	2874	protein_coding	Nuclear: Adult Only
ENSG00000132600.16_2	0.355286	0.164196	0.241344	0.826704	0.232736	0.00321072	ENSG00000132600	PRMT7	54496	protein_coding	Nuclear: Adult Only
ENSG00000132702.12_1	0.940602	0.249357		0.753617	0.23224	0.00783829	ENSG00000132702	HAPLN2	60484	protein_coding	Nuclear: Adult Only
ENSG00000132768.13_1	0.284634	0.188874	0.451576	0.615385	0.198914	0.0117245	ENSG00000132768	DPH2	1802	protein_coding	Nuclear: Adult Only
ENSG00000132781.17_2	0.115604	0.192411	0.81543	1.09224	0.260063	0.000391235	ENSG00000132781	MUTYH	4595	protein_coding	Nuclear: Adult Only
ENSG00000133069.15_2	0.343547	0.154103	0.227678	0.95859	0.211807	0.0001179	ENSG00000133069	TMCC2	9911	protein_coding	Nuclear: Adult Only
ENSG00000133243.8_2	0.261341	0.152593	0.378818	1.13802	0.22282	1.16e-05	ENSG00000133243	BTBD2	55643	protein_coding	Nuclear: Adult Only
ENSG00000133247.13_2	0.674033	0.212249	0.0513494	1.36776	0.282415	3.54e-05	ENSG00000133247	SUV420H2	84787	protein_coding	Nuclear: Adult Only
ENSG00000133275.11	0.345914	0.153015	0.218139	1.07942	0.179524	1.51e-07	ENSG00000133275	CSNK1G2	1455	protein_coding	Nuclear: Adult Only
ENSG00000133392.17_2	0.0349121	0.119559		1.25281	0.383307	0.00737324	ENSG00000133392	MYH11	4629	protein_coding	Nuclear: Adult Only
ENSG00000133401.15_2	0.466644	0.187732	0.168117	0.937445	0.227036	0.00049229	ENSG00000133401	PDZD2	23037	protein_coding	Nuclear: Adult Only
ENSG00000133466.13_1	0.409017	0.249774	0.407299	0.854815	0.319548	0.0330953	ENSG00000133466	C1QTNF6	114904	protein_coding	Nuclear: Adult Only
ENSG00000133519.12_1	0.210147	0.172252	0.568579	0.626026	0.194968	0.00861945	ENSG00000133519	ZDHHC8P1	150244	transcribed_unprocessed_pseudogene	Nuclear: Adult Only
ENSG00000133612.18_1	0.25586	0.137101	0.329056	0.632337	0.156434	0.000665463	ENSG00000133612	AGAP3	116988	protein_coding	Nuclear: Adult Only
ENSG00000133619.17_1	0.368274	0.207006	0.358598	1.22278	0.244627	1.86e-05	ENSG00000133619	KRBA1	84626	protein_coding	Nuclear: Adult Only
ENSG00000133624.13_1	0.395849	0.194714	0.276248	1.0555	0.257498	0.00054692	ENSG00000133624	ZNF767	79970	transcribed_unprocessed_pseudogene	Nuclear: Adult Only
ENSG00000133812.15_2	-0.0432376	0.136098	0.914835	0.749877	0.246611	0.0134952	ENSG00000133812	SBF2	81846	protein_coding	Nuclear: Adult Only
ENSG00000133858.15_1	0.0415438	0.140191	0.92128	0.671368	0.23831	0.0236262	ENSG00000133858	ZFC3H1	196441	protein_coding	Nuclear: Adult Only
ENSG00000133958.13_2	0.050269	0.145393	0.90666	0.9228	0.237147	0.00110261	ENSG00000133958	UNC79	57578	protein_coding	Nuclear: Adult Only	Autism Spectrum Disorder (from SAFARI)
ENSG00000134152.10_2	0.080662	0.162678	0.851671	0.928214	0.2493	0.00189394	ENSG00000134152	KATNBL1	79768	protein_coding	Nuclear: Adult Only
ENSG00000134253.9_1	0.097489	0.209203	0.862806	0.930177	0.285918	0.00766311	ENSG00000134253	TRIM45	80263	protein_coding	Nuclear: Adult Only
ENSG00000134285.10_2	0.470323	0.225828	0.262321	0.76263	0.269098	0.0226902	ENSG00000134285	FKBP11	51303	protein_coding	Nuclear: Adult Only
ENSG00000134686.17_2	0.225684	0.180957	0.557704	0.514787	0.175924	0.0179811	ENSG00000134686	PHC2	1912	protein_coding	Nuclear: Adult Only
ENSG00000134698.10_1	-0.143646	0.140484	0.648383	0.771466	0.245011	0.0101486	ENSG00000134698	AGO4	192670	protein_coding	Nuclear: Adult Only	Autism Spectrum Disorder (from SAFARI)
ENSG00000134815.18_1	0.305361	0.204317	0.454711	1.3272	0.320327	0.000470417	ENSG00000134815	DHX34	9704	protein_coding	Nuclear: Adult Only
ENSG00000134871.17_2	0.24362	0.240615	0.65274	0.879601	0.23399	0.00169564	ENSG00000134871	COL4A2	1284	protein_coding	Nuclear: Adult Only
ENSG00000134874.17_1	-0.05559	0.13203	0.881438	0.838936	0.225495	0.00191041	ENSG00000134874	DZIP1	22873	protein_coding	Nuclear: Adult Only
ENSG00000134884.13_2	0.561833	0.18003	0.0564571	1.00149	0.237891	0.000377912	ENSG00000134884	ARGLU1	55082	protein_coding	Nuclear: Adult Only
ENSG00000134982.16_2	-0.0978362	0.143362	0.788083	0.583333	0.193766	0.0145734	ENSG00000134982	APC	324	protein_coding	Nuclear: Adult Only	Autism Spectrum Disorder (from SAFARI)
ENSG00000135439.11_2	0.275014	0.195427	0.48883	1.08802	0.199041	2.27e-06	ENSG00000135439	AGAP2	116986	protein_coding	Nuclear: Adult Only	Autism Spectrum Disorder (from SAFARI)
ENSG00000135473.14_1	0.301153	0.164825	0.342069	1.36288	0.27663	2.51e-05	ENSG00000135473	PAN2	9924	protein_coding	Nuclear: Adult Only
ENSG00000135519.6_1	0.549795	0.229761	0.187398	1.37127	0.163675	6.57e-14	ENSG00000135519	KCNH3	23416	protein_coding	Nuclear: Adult Only
ENSG00000135596.17_2	0.432166	0.203896	0.254665	2.17486	0.256551	3.24e-14	ENSG00000135596	MICAL1	64780	protein_coding	Nuclear: Adult Only
ENSG00000135637.13_2	0.17583	0.204235	0.719972	1.25593	0.372988	0.00552026	ENSG00000135637	CCDC142	84865	protein_coding	Nuclear: Adult Only
ENSG00000135679.22_2	0.0620852	0.157806	0.892086	0.598655	0.187099	0.00887775	ENSG00000135679	MDM2	4193	protein_coding	Nuclear: Adult Only
ENSG00000135686.12_1	0.325689	0.178107	0.341505	0.886084	0.222348	0.00080015	ENSG00000135686	KLHL36	79786	protein_coding	Nuclear: Adult Only
ENSG00000135709.12_1	0.239889	0.212929	0.606136	0.649018	0.226459	0.0209764	ENSG00000135709	KIAA0513	9764	protein_coding	Nuclear: Adult Only
ENSG00000135722.8_2	0.367393	0.181047		1.1316	0.403937	0.0245313	ENSG00000135722	FBXL8	55336	protein_coding	Nuclear: Adult Only
ENSG00000135723.13_2	0.329536	0.249149		1.0472	0.282525	0.00199401	ENSG00000135723	FHOD1	29109	protein_coding	Nuclear: Adult Only
ENSG00000135740.16_2	0.449926	0.249818		0.759492	0.242004	0.0104191	ENSG00000135740	SLC9A5	6553	protein_coding	Nuclear: Adult Only
ENSG00000135776.4_1	0.482807	0.218521	0.232066	0.603969	0.219453	0.0275321	ENSG00000135776	ABCB10	23456	protein_coding	Nuclear: Adult Only
ENSG00000135835.10_1	0.520169	0.202073	0.149158	0.924815	0.253849	0.00243591	ENSG00000135835	KIAA1614	57710	protein_coding	Nuclear: Adult Only
ENSG00000135837.15_2	0.165452	0.13925	0.58257	0.958545	0.213264	0.000132424	ENSG00000135837	CEP350	9857	protein_coding	Nuclear: Adult Only
ENSG00000135945.9_1	-0.0187482	0.14268	0.970362	0.672902	0.227485	0.0166255	ENSG00000135945	REV1	51455	protein_coding	Nuclear: Adult Only
ENSG00000135976.16_1	0.330559	0.228204	0.47396	1.28065	0.335166	0.00139084	ENSG00000135976	ANKRD36	375248	protein_coding	Nuclear: Adult Only
ENSG00000136002.17_2	0.435087	0.197913	0.234005	1.12482	0.160448	6.79e-10	ENSG00000136002	ARHGEF4	101930241	protein_coding	Nuclear: Adult Only
ENSG00000136068.14_1	0.392701	0.208284	0.323245	0.687249	0.219931	0.0107868	ENSG00000136068	FLNB	2317	protein_coding	Nuclear: Adult Only
ENSG00000136367.13_2	0.466397	0.178389	0.140215	0.695144	0.274141	0.0454414	ENSG00000136367	ZFHX2	85446	protein_coding	Nuclear: Adult Only
ENSG00000136383.6_1	0.227017	0.24555		0.903489	0.339537	0.0341284	ENSG00000136383	ALPK3	57538	protein_coding	Nuclear: Adult Only	Bipolar Affective Disorder (from GWAS)
ENSG00000136699.19_2	0.205106	0.13218	0.43423	0.880243	0.207465	0.00033486	ENSG00000136699	SMPD4	55627	protein_coding	Nuclear: Adult Only
ENSG00000136720.6_1	0.255563	0.204447	0.557057	0.579211	0.184401	0.0103449	ENSG00000136720	HS6ST1	9394	protein_coding	Nuclear: Adult Only
ENSG00000136848.16_1	0.433905	0.179171	0.179508	0.840671	0.22624	0.0019394	ENSG00000136848	DAB2IP	153090	protein_coding	Nuclear: Adult Only	Schizophrenia (from rare SNVs)
ENSG00000136877.14_2	0.240373	0.182099	0.525638	0.815368	0.26994	0.0141847	ENSG00000136877	FPGS	2356	protein_coding	Nuclear: Adult Only
ENSG00000136878.12_2	0.378898	0.179854	0.257375	0.528056	0.173173	0.0131953	ENSG00000136878	USP20	10868	protein_coding	Nuclear: Adult Only
ENSG00000136883.12_1	0.253857	0.181694		1.37727	0.355262	0.00115643	ENSG00000136883	KIF12	113220	protein_coding	Nuclear: Adult Only
ENSG00000137098.13_2	0.106541	0.249833		0.930751	0.353409	0.036261	ENSG00000137098	SPAG8	26206	protein_coding	Nuclear: Adult Only
ENSG00000137218.10_1	0.293171	0.170199	0.376733	0.881847	0.22868	0.00123579	ENSG00000137218	FRS3	10817	protein_coding	Nuclear: Adult Only
ENSG00000137221.14_1	0.396338	0.207944	0.31695	0.974883	0.323287	0.0143817	ENSG00000137221	TJAP1	93643	protein_coding	Nuclear: Adult Only
ENSG00000137225.12_1				1.24754	0.488856	0.0437252	ENSG00000137225	CAPN11	11131	protein_coding	Nuclear: Adult Only
ENSG00000137411.16_2	0.524509	0.187713	0.104078	1.21084	0.267139	0.000114983	ENSG00000137411	VARS2	57176	protein_coding	Nuclear: Adult Only
ENSG00000137474.19_1	0.221768	0.218645		0.88573	0.312352	0.0226037	ENSG00000137474	MYO7A	4647	protein_coding	Nuclear: Adult Only
ENSG00000137504.13_1	0.259402	0.166107	0.43105	0.673563	0.227925	0.0167366	ENSG00000137504	CREBZF	58487	protein_coding	Nuclear: Adult Only
ENSG00000137558.7_1	0.53244	0.233467		1.74333	0.432621	0.000691957	ENSG00000137558	PI15	51050	protein_coding	Nuclear: Adult Only
ENSG00000137802.13_2	0.241591	0.180533	0.517637	1.45957	0.247215	2.64e-07	ENSG00000137802	MAPKBP1	23005	protein_coding	Nuclear: Adult Only
ENSG00000137841.11_2	0.219685	0.230142	0.679938	0.724355	0.276719	0.0376298	ENSG00000137841	PLCB2	5330	protein_coding	Nuclear: Adult Only
ENSG00000137843.11_2	0.122217	0.206173	0.818209	0.667355	0.223474	0.015458	ENSG00000137843	PAK6	56924	protein_coding	Nuclear: Adult Only
ENSG00000137877.9_1	0.554443	0.249962		1.52249	0.306094	2.06e-05	ENSG00000137877	SPTBN5	51332	protein_coding	Nuclear: Adult Only
ENSG00000137962.12_1	0.366843	0.250132	0.46713	0.641155	0.240291	0.0335886	ENSG00000137962	ARHGAP29	9411	protein_coding	Nuclear: Adult Only
ENSG00000137968.16_1	0.0095426	0.196348	0.989215	1.2254	0.274103	0.000145651	ENSG00000137968	SLC44A5	204962	protein_coding	Nuclear: Adult Only
ENSG00000138002.14_2	-0.00653127	0.172109	0.991338	0.88838	0.219321	0.00064653	ENSG00000138002	IFT172	26160	protein_coding	Nuclear: Adult Only
ENSG00000138074.14_2	0.223355	0.180591	0.562726	0.906462	0.255372	0.00323596	ENSG00000138074	SLC5A6	8884	protein_coding	Nuclear: Adult Only
ENSG00000138100.13_1	0.0127398	0.0604528		1.34553	0.36225	0.00194872	ENSG00000138100	TRIM54	57159	protein_coding	Nuclear: Adult Only
ENSG00000138111.14_2	0.0499081	0.184157	0.928555	0.567438	0.225347	0.0470977	ENSG00000138111	TMEM180	79847	protein_coding	Nuclear: Adult Only
ENSG00000138115.13_1	0.414292	0.250194		1.10188	0.4134	0.0337971	ENSG00000138115	CYP2C8	1558	protein_coding	Nuclear: Adult Only
ENSG00000138346.14_2	0.1359	0.204216	0.792906	0.883739	0.34654	0.0438995	ENSG00000138346	D2	1763	protein_coding	Nuclear: Adult Only
ENSG00000138379.4_1	0.35681	0.186718		1.62042	0.497761	0.0076199	ENSG00000138379	MSTN	2660	protein_coding	Nuclear: Adult Only
ENSG00000138434.16_1	0.27029	0.161815	0.395211	0.763502	0.206467	0.00204666	ENSG00000138434	SSFA2	6744	protein_coding	Nuclear: Adult Only	Schizophrenia (from rare SNVs)
ENSG00000138468.15_2	0.428161	0.173417	0.171486	0.857671	0.238814	0.00284861	ENSG00000138468	SENP7	57337	protein_coding	Nuclear: Adult Only
ENSG00000138617.14_1	-0.0404981	0.183978	0.946129	0.86772	0.319758	0.030244	ENSG00000138617	PARP16	54956	protein_coding	Nuclear: Adult Only
ENSG00000138658.15_2	0.334371	0.241707	0.499169	1.10464	0.368692	0.0150499	ENSG00000138658	C4orf21	55345	protein_coding	Nuclear: Adult Only
ENSG00000138735.15_1	0.210974	0.249398	0.725119	1.03157	0.293507	0.00360203	ENSG00000138735	PDE5A	8654	protein_coding	Nuclear: Adult Only
ENSG00000138771.14_2	0.212936	0.226166	0.68614	0.643233	0.218878	0.0174271	ENSG00000138771	SHROOM3	100996628	protein_coding	Nuclear: Adult Only
ENSG00000138867.16_2	0.108951	0.146735	0.764467	0.732814	0.210884	0.00404502	ENSG00000138867	GUCD1	83606	protein_coding	Nuclear: Adult Only
ENSG00000138944.7_1	0.306546	0.204971	0.454585	1.13965	0.272966	0.000424207	ENSG00000138944	KIAA1644	85352	protein_coding	Nuclear: Adult Only
ENSG00000139044.10_2	0.330017	0.243273	0.509578	1.47239	0.260298	8.91e-07	ENSG00000139044	B4GALNT3	283358	protein_coding	Nuclear: Adult Only
ENSG00000139372.14_2	-0.174325	0.181209	0.677117	0.654722	0.220104	0.0159251	ENSG00000139372	TDG	6996	protein_coding	Nuclear: Adult Only
ENSG00000139438.5_2	0.433766	0.250142	0.372676	1.07859	0.271444	0.0008344	ENSG00000139438	FAM222A	84915	protein_coding	Nuclear: Adult Only
ENSG00000139546.10_2	0.456497	0.186919	0.177559	0.911666	0.239539	0.00146141	ENSG00000139546	TARBP2	6895	protein_coding	Nuclear: Adult Only
ENSG00000139597.17_2	0.295721	0.218286	0.510326	0.537537	0.193666	0.0260345	ENSG00000139597	N4BP2L1	90634	protein_coding	Nuclear: Adult Only
ENSG00000139624.12_1	0.113663	0.160781	0.778161	0.771645	0.256898	0.0147735	ENSG00000139624	CERS5	91012	protein_coding	Nuclear: Adult Only
ENSG00000139625.12_1	0.180898	0.165413	0.619058	0.994144	0.278255	0.0030133	ENSG00000139625	MAP3K12	7786	protein_coding	Nuclear: Adult Only
ENSG00000139631.18_2	0.512163	0.223075	0.209771	0.866796	0.249308	0.00402832	ENSG00000139631	CSAD	51380	protein_coding	Nuclear: Adult Only
ENSG00000139636.15_1	0.285715	0.162835	0.368227	1.09256	0.194981	1.16e-06	ENSG00000139636	LMBR1L	55716	protein_coding	Nuclear: Adult Only
ENSG00000139718.10_1	0.261669	0.168281	0.433538	0.772796	0.251363	0.0123425	ENSG00000139718	SETD1B	23067	protein_coding	Nuclear: Adult Only
ENSG00000139722.6_2	0.268027	0.172369	0.433538	0.669229	0.199874	0.0058403	ENSG00000139722	VPS37B	79720	protein_coding	Nuclear: Adult Only
ENSG00000139998.14_1	0.245575	0.188682	0.534304	0.576501	0.199383	0.0195918	ENSG00000139998	RAB15	376267	protein_coding	Nuclear: Adult Only
ENSG00000140090.17_2	0.0937107	0.105313		0.597609	0.23595	0.0457122	ENSG00000140090	SLC24A4	123041	protein_coding	Nuclear: Adult Only	Neurodegenerative Disorder
ENSG00000140181.10	0.334619	0.221228	0.44921	1.58965	0.193907	2.52e-13	ENSG00000140181	HERC2P2	101930157	pseudogene	Nuclear: Adult Only
ENSG00000140326.12_1	0.263562	0.200299	0.52783	1.38911	0.311584	0.000152303	ENSG00000140326	CDAN1	146059	protein_coding	Nuclear: Adult Only	Bipolar Affective Disorder (from GWAS)
ENSG00000140398.13_2	0.46712	0.229255	0.275438	1.53409	0.242589	2.97e-08	ENSG00000140398	NEIL1	693216	protein_coding	Nuclear: Adult Only
ENSG00000140400.15_2	0.609985	0.212291	0.0915875	1.94259	0.288324	3.07e-09	ENSG00000140400	MAN2C1	4123	protein_coding	Nuclear: Adult Only
ENSG00000140534.13_2	0.113508	0.249034	0.86813	1.40516	0.504243	0.02541	ENSG00000140534	TICRR	90381	protein_coding	Nuclear: Adult Only
ENSG00000140564.10_2	0.323348	0.187928	0.376775	0.55845	0.204362	0.0288568	ENSG00000140564	FURIN	5045	protein_coding	Nuclear: Adult Only
ENSG00000140577.15_2	0.0745532	0.158463	0.860931	0.763929	0.25425	0.0147445	ENSG00000140577	CRTC3	64784	protein_coding	Nuclear: Adult Only
ENSG00000140678.16_1	0.0955974	0.17848		0.977138	0.391892	0.0498883	ENSG00000140678	ITGAX	3687	protein_coding	Nuclear: Adult Only
ENSG00000140807.6_2	0.418805	0.24995	0.39328	0.864835	0.317397	0.0294145	ENSG00000140807	NKD1	85407	protein_coding	Nuclear: Adult Only
ENSG00000140839.11_1	0.282584	0.245499		1.14507	0.445663	0.04201	ENSG00000140839	CLEC18B	497190	protein_coding	Nuclear: Adult Only
ENSG00000140948.11_2	0.156865	0.151403	0.643794	0.776154	0.174654	0.000160981	ENSG00000140948	ZCCHC14	23174	protein_coding	Nuclear: Adult Only
ENSG00000140992.18_2	0.198471	0.16697	0.58229	0.473987	0.18136	0.0379259	ENSG00000140992	PDPK1	101060747	protein_coding	Nuclear: Adult Only
ENSG00000140995.16_2	0.434923	0.171536	0.156054	0.781987	0.1702	9.29e-05	ENSG00000140995	DEF8	54849	protein_coding	Nuclear: Adult Only
ENSG00000141013.15_2	0.671907	0.213448	0.0541654	0.838073	0.220926	0.00152132	ENSG00000141013	GAS8	2622	protein_coding	Nuclear: Adult Only
ENSG00000141068.13_2	0.408796	0.175395	0.201513	0.903062	0.329314	0.0281827	ENSG00000141068	KSR1	8844	protein_coding	Nuclear: Adult Only
ENSG00000141084.10_2	0.344353	0.200123	0.376775	0.81947	0.256731	0.00904186	ENSG00000141084	RANBP10	57610	protein_coding	Nuclear: Adult Only
ENSG00000141314.12_2	0.481463	0.244065	0.29638	1.00354	0.200702	1.86e-05	ENSG00000141314	RHBDL3	162494	protein_coding	Nuclear: Adult Only
ENSG00000141391.13_2	0.494548	0.219593	0.220827	1.02667	0.289634	0.0032888	ENSG00000141391	SLMO1	10650	protein_coding	Nuclear: Adult Only
ENSG00000141519.14_2	0.0658427	0.238103	0.926719	1.37451	0.34105	0.000691268	ENSG00000141519	CCDC40	55036	protein_coding	Nuclear: Adult Only
ENSG00000141524.15_2	0.215761	0.250157		0.686392	0.266219	0.0411652	ENSG00000141524	TMC6	11322	protein_coding	Nuclear: Adult Only
ENSG00000141556.20_2	0.345781	0.15728	0.234005	0.453159	0.173292	0.037796	ENSG00000141556	TBCD	101929597	protein_coding	Nuclear: Adult Only
ENSG00000141576.14_2	-0.0270945	0.173293	0.965297	0.68321	0.266582	0.0426235	ENSG00000141576	RNF157	114804	protein_coding	Nuclear: Adult Only
ENSG00000141622.13_2	0.0975577	0.164387	0.817923	0.749555	0.208378	0.0027974	ENSG00000141622	RNF165	494470	protein_coding	Nuclear: Adult Only
ENSG00000141750.6_1	0.0309282	0.248565		1.0374	0.260835	0.000824201	ENSG00000141750	STAC2	342667	protein_coding	Nuclear: Adult Only	Schizophrenia (from rare SNVs)
ENSG00000141905.17_2	0.250524	0.212313	0.586366	0.85404	0.262214	0.00758252	ENSG00000141905	NFIC	101928686	protein_coding	Nuclear: Adult Only
ENSG00000141965.4_1	0.234701	0.192266	0.568396	1.29959	0.326387	0.000810225	ENSG00000141965	FEM1A	55527	protein_coding	Nuclear: Adult Only
ENSG00000141985.9_2	0.0316884	0.135693	0.940849	0.615037	0.206219	0.0156114	ENSG00000141985	SH3GL1	6455	protein_coding	Nuclear: Adult Only
ENSG00000141994.15_2	0.345093	0.193199	0.356586	0.753177	0.263648	0.0214282	ENSG00000141994	DUS3L	56931	protein_coding	Nuclear: Adult Only
ENSG00000142102.15_2	0.6874	0.245348		1.79939	0.380499	5.49e-05	ENSG00000142102	ATHL1	80162	protein_coding	Nuclear: Adult Only
ENSG00000142156.14_1	0.211233	0.151557	0.494329	1.15722	0.271423	0.000311505	ENSG00000142156	COL6A1	1291	protein_coding	Nuclear: Adult Only
ENSG00000142185.16_2	0.501667	0.248915		0.56739	0.18917	0.014934	ENSG00000142185	TRPM2	7226	protein_coding	Nuclear: Adult Only
ENSG00000142208.15_2	0.383987	0.124681	0.0613204	0.580693	0.225864	0.0418512	ENSG00000142208	AKT1	207	protein_coding	Nuclear: Adult Only
ENSG00000142235.8_1	0.123085	0.170915	0.771851	0.590649	0.218621	0.0310691	ENSG00000142235	LMTK3	114783	protein_coding	Nuclear: Adult Only
ENSG00000142279.12_1	0.515875	0.2005	0.149215	1.02665	0.255952	0.000732313	ENSG00000142279	WTIP	126374	protein_coding	Nuclear: Adult Only
ENSG00000142303.13_1	0.600561	0.200927	0.0740682	1.61762	0.257833	3.79e-08	ENSG00000142303	ADAMTS10	81794	protein_coding	Nuclear: Adult Only
ENSG00000142449.12_2	0.585717	0.225478	0.143166	1.09758	0.42594	0.0412575	ENSG00000142449	FBN3	84467	protein_coding	Nuclear: Adult Only
ENSG00000142459.8_2	0.334389	0.175957	0.318027	0.676143	0.250399	0.0311815	ENSG00000142459	EVI5L	115704	protein_coding	Nuclear: Adult Only
ENSG00000142609.17_1	-0.0891227	0.127272		0.830821	0.291582	0.0218489	ENSG00000142609	C1orf222	85452	protein_coding	Nuclear: Adult Only
ENSG00000142675.17_1	0.400571	0.223895	0.355379	1.15234	0.317931	0.00257684	ENSG00000142675	CNKSR1	10256	protein_coding	Nuclear: Adult Only
ENSG00000142733.14_1	0.477198	0.248683		1.24557	0.264614	5.92e-05	ENSG00000142733	MAP3K6	9064	protein_coding	Nuclear: Adult Only
ENSG00000143033.17_1	0.246934	0.16692	0.462016	0.594214	0.225352	0.0360043	ENSG00000143033	MTF2	22823	protein_coding	Nuclear: Adult Only
ENSG00000143127.12_1	0.330632	0.250135		1.01348	0.390001	0.0393329	ENSG00000143127	ITGA10	8515	protein_coding	Nuclear: Adult Only
ENSG00000143258.15_2	0.414504	0.156867	0.135189	0.8274	0.216856	0.00141668	ENSG00000143258	USP21	27005	protein_coding	Nuclear: Adult Only
ENSG00000143375.14_2	0.301981	0.246953	0.567756	1.52442	0.350286	0.000227587	ENSG00000143375	CGN	57530	protein_coding	Nuclear: Adult Only
ENSG00000143382.14_2	0.072589	0.164079		1.38034	0.509185	0.0304439	ENSG00000143382	ADAMTSL4	54507	protein_coding	Nuclear: Adult Only
ENSG00000143434.15_1	0.506849	0.179259	0.0983256	0.818387	0.224675	0.00243949	ENSG00000143434	SEMA6C	10500	protein_coding	Nuclear: Adult Only
ENSG00000143442.21_2	0.0598234	0.119088	0.848925	0.639806	0.232706	0.0277143	ENSG00000143442	POGZ	23126	protein_coding	Nuclear: Adult Only
ENSG00000143515.16_2	0.486242	0.188583	0.148175	1.02956	0.290332	0.00327541	ENSG00000143515	ATP8B2	57198	protein_coding	Nuclear: Adult Only
ENSG00000143624.13_2	0.189859	0.146789	0.53835	0.645209	0.236462	0.0291419	ENSG00000143624	INTS3	65123	protein_coding	Nuclear: Adult Only
ENSG00000143630.9_1	0.258507	0.197602	0.531659	1.04304	0.251263	0.000457788	ENSG00000143630	HCN3	57657	protein_coding	Nuclear: Adult Only
ENSG00000143669.13_2	0.059149	0.1641	0.902038	0.597718	0.203387	0.0174271	ENSG00000143669	LYST	1130	protein_coding	Nuclear: Adult Only
ENSG00000143674.10_1	0.241327	0.249088		0.889904	0.276583	0.0084785	ENSG00000143674		84451	protein_coding	Nuclear: Adult Only
ENSG00000143845.14_2	-0.0805251	0.211623	0.8947	0.790158	0.291653	0.0305534	ENSG00000143845	ETNK2	55224	protein_coding	Nuclear: Adult Only
ENSG00000143847.15_1	0.656271	0.209231	0.0549988	1.28768	0.192135	3.65e-09	ENSG00000143847	PPFIA4	8497	protein_coding	Nuclear: Adult Only
ENSG00000143869.6_1	0.119321	0.182298		1.10577	0.267097	0.000475782	ENSG00000143869	GDF7	151449	protein_coding	Nuclear: Adult Only
ENSG00000144026.11_2	0.17608	0.218975	0.740565	0.909089	0.262093	0.0041164	ENSG00000144026	ZNF514	84874	protein_coding	Nuclear: Adult Only
ENSG00000144057.15_2	-0.0582184	0.1499	0.892086	0.536739	0.203694	0.0361645	ENSG00000144057	ST6GAL2	84620	protein_coding	Nuclear: Adult Only
ENSG00000144504.15_2	0.515145	0.213178	0.180981	0.864604	0.273884	0.00996129	ENSG00000144504	ANKMY1	51281	protein_coding	Nuclear: Adult Only
ENSG00000144550.12_1	0.0106341	0.138258		0.662325	0.202331	0.0072808	ENSG00000144550	CPNE9	151835	protein_coding	Nuclear: Adult Only
ENSG00000144596.12_2	0.644955	0.231432	0.105477	1.62697	0.277835	3.39e-07	ENSG00000144596	GRIP2		protein_coding	Nuclear: Adult Only
ENSG00000144677.14_1	0.341974	0.187227	0.342238	0.897194	0.206336	0.000231177	ENSG00000144677	CTDSPL	10217	protein_coding	Nuclear: Adult Only
ENSG00000144711.13_2	0.285513	0.175308	0.411231	1.06809	0.243117	0.000195302	ENSG00000144711	IQSEC1	9922	protein_coding	Nuclear: Adult Only
ENSG00000144824.19_2	0.163965	0.249459	0.795257	1.28453	0.254268	1.5e-05	ENSG00000144824	PHLDB2	90102	protein_coding	Nuclear: Adult Only
ENSG00000144935.14_1	0.247943	0.174497	0.484354	0.606734	0.190612	0.00924371	ENSG00000144935	TRPC1	7220	protein_coding	Nuclear: Adult Only
ENSG00000145016.14_2	0.045849	0.162019	0.924898	0.555366	0.210187	0.0355911	ENSG00000145016	KIAA0226	9711	protein_coding	Nuclear: Adult Only
ENSG00000145194.17_1	0.536246	0.248855		0.835928	0.220837	0.00156005	ENSG00000145194	ECE2	9718	protein_coding	Nuclear: Adult Only
ENSG00000145198.14_1	0.175138	0.250004		2.02921	0.227208	8.58e-16	ENSG00000145198	VWA5B2	90113	protein_coding	Nuclear: Adult Only
ENSG00000145217.13_2	0.668219	0.227036	0.08045	1.41491	0.408113	0.00413596	ENSG00000145217	SLC26A1	10861	protein_coding	Nuclear: Adult Only
ENSG00000145725.19_2	0.196448	0.128472	0.44314	0.547046	0.198614	0.0274066	ENSG00000145725	PPIP5K2	23262	protein_coding	Nuclear: Adult Only
ENSG00000145734.18_2	0.145063	0.179094	0.738012	0.696209	0.222136	0.0105198	ENSG00000145734	BDP1	55814	protein_coding	Nuclear: Adult Only
ENSG00000146054.17_1	0.379453	0.244299		1.34522	0.315575	0.000312091	ENSG00000146054	TRIM7	81786	protein_coding	Nuclear: Adult Only
ENSG00000146067.15_1	0.61554	0.193936	0.051511	1.37645	0.233027	2.6e-07	ENSG00000146067	FAM193B	54540	protein_coding	Nuclear: Adult Only
ENSG00000146083.11_1	0.311238	0.17856	0.370898	0.721463	0.236032	0.0129376	ENSG00000146083	RNF44	22838	protein_coding	Nuclear: Adult Only
ENSG00000146094.13_2	0.399438	0.227486	0.367584	1.09189	0.347869	0.0104077	ENSG00000146094	DOK3	79930	protein_coding	Nuclear: Adult Only
ENSG00000146215.13_2	0.480142	0.248173		1.1158	0.372057	0.0149469	ENSG00000146215	CRIP3	401262	protein_coding	Nuclear: Adult Only
ENSG00000146216.11_2	0.378244	0.185459	0.274962	0.983018	0.303411	0.00795388	ENSG00000146216	TTBK1	84630	protein_coding	Nuclear: Adult Only
ENSG00000146247.13_2	0.407357	0.174514	0.200873	0.897255	0.185648	3.64e-05	ENSG00000146247	PHIP	55023	protein_coding	Nuclear: Adult Only
ENSG00000146281.5_1	0.216972	0.187675	0.596383	0.713265	0.242447	0.0173049	ENSG00000146281	PM20D2	135293	protein_coding	Nuclear: Adult Only
ENSG00000146373.16_2	0.444991	0.200861	0.231065	1.06035	0.23787	0.000152366	ENSG00000146373	RNF217	154214	protein_coding	Nuclear: Adult Only
ENSG00000146556.14_1	0.385394	0.197863	0.305136	0.725761	0.260249	0.0252891	ENSG00000146556	WASH2P	100288778	transcribed_unprocessed_pseudogene	Nuclear: Adult Only
ENSG00000146587.17_2	0.136164	0.178833	0.758558	0.725863	0.230006	0.00998102	ENSG00000146587	RBAK	57786	protein_coding	Nuclear: Adult Only
ENSG00000147050.14_2	-0.0622277	0.202224	0.918045	0.764447	0.231955	0.00684741	ENSG00000147050	KDM6A	7403	protein_coding	Nuclear: Adult Only
ENSG00000147162.13_1	0.420339	0.17463	0.184517	0.811689	0.227014	0.0029989	ENSG00000147162	OGT	8473	protein_coding	Nuclear: Adult Only	Autism Spectrum Disorder (from SAFARI)
ENSG00000147174.11_1	0.153246	0.246338		1.03839	0.320548	0.00796142	ENSG00000147174	ACRC	93953	protein_coding	Nuclear: Adult Only
ENSG00000147459.17_1	0.0150974	0.153881		0.758134	0.272635	0.0257556	ENSG00000147459	DOCK5	80005	protein_coding	Nuclear: Adult Only
ENSG00000147535.16_2	-0.0385159	0.152016	0.935357	0.641967	0.248116	0.0403516	ENSG00000147535	PPAPDC1B	84513	protein_coding	Nuclear: Adult Only
ENSG00000147724.11_2	0.280424	0.198087	0.486438	0.595888	0.216064	0.0272023	ENSG00000147724	FAM135B	51059	protein_coding	Nuclear: Adult Only
ENSG00000147799.11_1	0.466206	0.20195	0.207931	0.736482	0.225474	0.00741886	ENSG00000147799	ARHGAP39	80728	protein_coding	Nuclear: Adult Only
ENSG00000148019.12_1	0.060018	0.14181	0.880667	0.627747	0.222725	0.0235512	ENSG00000148019	CEP78	84131	protein_coding	Nuclear: Adult Only
ENSG00000148082.9_2	0.175155	0.189547	0.695489	1.04401	0.211309	2.35e-05	ENSG00000148082	SHC3	53358	protein_coding	Nuclear: Adult Only
ENSG00000148396.18_1	0.217447	0.141857	0.441568	0.714018	0.169396	0.000370592	ENSG00000148396	SEC16A	9919	protein_coding	Nuclear: Adult Only
ENSG00000148399.12_2	0.470834	0.19387	0.179508	0.893136	0.23307	0.00134031	ENSG00000148399	DPH7	92715	protein_coding	Nuclear: Adult Only
ENSG00000148408.12_2	0.236366	0.199539	0.584526	0.673247	0.20967	0.00861945	ENSG00000148408	CAC1B	774	protein_coding	Nuclear: Adult Only
ENSG00000148848.14_2	0.215761	0.245606	0.714317	1.25241	0.480982	0.0388316	ENSG00000148848	ADAM12	8038	protein_coding	Nuclear: Adult Only
ENSG00000148985.19_2	0.295782	0.201569	0.466749	0.710685	0.262035	0.0303661	ENSG00000148985	PGAP2	27315	protein_coding	Nuclear: Adult Only
ENSG00000149091.15_2	0.504177	0.159459	0.0529772	0.97421	0.169299	5.51e-07	ENSG00000149091	DGKZ	8525	protein_coding	Nuclear: Adult Only	Autism Spectrum Disorder (from SAFARI)
ENSG00000149311.17_1	0.188261	0.14898	0.551427	0.651376	0.20362	0.00888965	ENSG00000149311	ATM	472	protein_coding	Nuclear: Adult Only
ENSG00000149328.14_1	0.427165	0.226944	0.324656	1.02121	0.298276	0.00470236	ENSG00000149328	GLB1L2	89944	protein_coding	Nuclear: Adult Only
ENSG00000149451.17_1	0.124214	0.17044	0.76903	2.12762	0.300926	4.8e-10	ENSG00000149451	ADAM33	80332	protein_coding	Nuclear: Adult Only
ENSG00000149527.17_2	0.598464	0.195645	0.0635159	1.86721	0.237872	2.46e-12	ENSG00000149527	PLCH2	9651	protein_coding	Nuclear: Adult Only
ENSG00000149596.6_1	0.175598	0.147347		1.34267	0.450127	0.0156079	ENSG00000149596	JPH2	57158	protein_coding	Nuclear: Adult Only
ENSG00000150275.17_2	0.490303	0.250029		1.03099	0.355242	0.0190891	ENSG00000150275	PCDH15	65217	protein_coding	Nuclear: Adult Only	Autism Spectrum Disorder (from SAFARI)
ENSG00000150712.10_1	0.236458	0.171418	0.500598	0.674301	0.188073	0.00290456	ENSG00000150712	MTMR12	54545	protein_coding	Nuclear: Adult Only
ENSG00000151006.7_2	0.866718	0.247697		2.82745	0.408199	1.1e-09	ENSG00000151006	PRSS53	339105	protein_coding	Nuclear: Adult Only
ENSG00000151640.12_1	0.153039	0.132671	0.596873	0.455665	0.164652	0.0265496	ENSG00000151640	DPYSL4	10570	protein_coding	Nuclear: Adult Only
ENSG00000151651.15_2	0.720668	0.250093		1.78616	0.333314	3.79e-06	ENSG00000151651	ADAM8	101	protein_coding	Nuclear: Adult Only
ENSG00000151692.14_1	-0.0139796	0.153943	0.979179	0.608228	0.183456	0.00645256	ENSG00000151692	RNF144A	9781	protein_coding	Nuclear: Adult Only
ENSG00000151835.14_2	-0.0275443	0.162298	0.961092	0.643528	0.196792	0.00733806	ENSG00000151835	SACS	26278	protein_coding	Nuclear: Adult Only
ENSG00000151883.17_2	0.158819	0.161706	0.667532	0.688622	0.212593	0.00796553	ENSG00000151883	PARP8	79668	protein_coding	Nuclear: Adult Only
ENSG00000152076.18_1	0.257596	0.245601		0.870109	0.291689	0.0156054	ENSG00000152076	CCDC74B	91409	protein_coding	Nuclear: Adult Only
ENSG00000152117.17_1	0.600499	0.230137	0.140882	1.40267	0.369817	0.00152403	ENSG00000152117		150776	transcribed_processed_pseudogene	Nuclear: Adult Only
ENSG00000152270.8_1	0.446762	0.212067	0.257375	1.00998	0.310514	0.00767371	ENSG00000152270	PDE3B	5140	protein_coding	Nuclear: Adult Only
ENSG00000152475.6_1	0.374085	0.246014		1.26791	0.43864	0.0196298	ENSG00000152475	ZNF837	116412	protein_coding	Nuclear: Adult Only
ENSG00000152520.13_2	0.46716	0.162597	0.0915875	0.771865	0.241579	0.00897376	ENSG00000152520	PAN3	255967	protein_coding	Nuclear: Adult Only
ENSG00000152527.13_2	-0.0371468	0.24935		0.940999	0.339015	0.0260333	ENSG00000152527	PLEKHH2	130271	protein_coding	Nuclear: Adult Only
ENSG00000152582.13_2	-0.19319	0.210888	0.699417	0.663125	0.251103	0.0356745	ENSG00000152582	SPEF2	79925	protein_coding	Nuclear: Adult Only
ENSG00000153207.14_2	0.0980324	0.141204	0.782286	0.625213	0.235652	0.0347303	ENSG00000153207	AHCTF1	25909	protein_coding	Nuclear: Adult Only
ENSG00000153246.12_2	0.122365	0.228034		1.04442	0.316953	0.00685398	ENSG00000153246	PLA2R1	22925	protein_coding	Nuclear: Adult Only
ENSG00000153253.15_2	0.0687987	0.15712	0.875129	0.899448	0.197732	0.000108301	ENSG00000153253	SCN3A	6328	protein_coding	Nuclear: Adult Only	Neurodegenerative Disorder
ENSG00000153885.14_1	0.267928	0.171797	0.431797	0.827403	0.20329	0.000604802	ENSG00000153885	KCTD15	79047	protein_coding	Nuclear: Adult Only
ENSG00000153922.10_2	0.138784	0.143197	0.67356	0.790673	0.260479	0.0136743	ENSG00000153922	CHD1	1105	protein_coding	Nuclear: Adult Only
ENSG00000154099.17_1	0.0739143	0.24673		0.879088	0.25719	0.00477909	ENSG00000154099	DAF1	123872	protein_coding	Nuclear: Adult Only
ENSG00000154118.12_1	0.283046	0.18108	0.430447	1.12733	0.224465	1.69e-05	ENSG00000154118	JPH3	57338	protein_coding	Nuclear: Adult Only
ENSG00000154134.14_1	0.485421	0.228166	0.25294	1.61189	0.261401	6.6e-08	ENSG00000154134	ROBO3	64221	protein_coding	Nuclear: Adult Only
ENSG00000154222.14_2	0.410634	0.184658	0.228832	0.613721	0.226835	0.0307919	ENSG00000154222	CC2D1B	200014	protein_coding	Nuclear: Adult Only
ENSG00000154237.12_2	0.22538	0.210784		0.887603	0.257786	0.0044278	ENSG00000154237	LRRK1	79705	protein_coding	Nuclear: Adult Only
ENSG00000154258.16_1	0.254517	0.231518		0.856247	0.339753	0.0469229	ENSG00000154258	ABCA9	10350	protein_coding	Nuclear: Adult Only
ENSG00000154263.17_2	0.323514	0.225872		0.932269	0.316849	0.0172892	ENSG00000154263	ABCA10	10349	protein_coding	Nuclear: Adult Only	Autism Spectrum Disorder (from SAFARI)
ENSG00000154370.14_2	0.247062	0.170019	0.47236	0.867825	0.221938	0.00103442	ENSG00000154370	TRIM11	81559	protein_coding	Nuclear: Adult Only
ENSG00000154803.12_2	0.203905	0.185349	0.616798	0.665757	0.176996	0.00168476	ENSG00000154803	FLCN	201163	protein_coding	Nuclear: Adult Only
ENSG00000154832.14_1	0.312081	0.141486	0.232695	0.924858	0.212398	0.000225892	ENSG00000154832	CXXC1	30827	protein_coding	Nuclear: Adult Only
ENSG00000154845.15_1	0.036632	0.129816	0.925121	0.59552	0.211744	0.023858	ENSG00000154845	PPP4R1	9989	protein_coding	Nuclear: Adult Only
ENSG00000155158.20_2	0.357122	0.230455	0.434479	0.499393	0.198616	0.0475171	ENSG00000155158	TTC39B	158219	protein_coding	Nuclear: Adult Only
ENSG00000155254.12_1	0.274747	0.216668	0.548677	0.848978	0.296167	0.0209475	ENSG00000155254	MARVELD1	83742	protein_coding	Nuclear: Adult Only
ENSG00000155265.10_1	0.430478	0.197773	0.238055	0.82349	0.155862	5.28e-06	ENSG00000155265	GOLGA7B	401647	protein_coding	Nuclear: Adult Only
ENSG00000155275.18_2	0.308768	0.192645	0.418745	0.910439	0.325591	0.0248492	ENSG00000155275	TRMT44	152992	protein_coding	Nuclear: Adult Only
ENSG00000155363.18_1	0.360805	0.250186	0.476396	1.20895	0.294112	0.000527711	ENSG00000155363	MOV10	4343	protein_coding	Nuclear: Adult Only
ENSG00000155657.25_2	0.352746	0.23634	0.455201	1.02659	0.294684	0.00395195	ENSG00000155657	TTN	7273	protein_coding	Nuclear: Adult Only	Schizophrenia (from rare SNVs)
ENSG00000155846.16_1	0.207771	0.244708		0.86064	0.228118	0.00162489	ENSG00000155846	PPARGC1B	133522	protein_coding	Nuclear: Adult Only
ENSG00000155903.11_2	0.519516	0.179948	0.0891418	0.912336	0.210493	0.000241744	ENSG00000155903	RASA2	5922	protein_coding	Nuclear: Adult Only
ENSG00000156103.15_2	0.274985	0.164842	0.396052	0.621744	0.234648	0.0349937	ENSG00000156103	MMP16	4325	protein_coding	Nuclear: Adult Only
ENSG00000156381.8_2	0.551036	0.24908	0.231402	0.804473	0.177218	0.000111817	ENSG00000156381	ANKRD9	122416	protein_coding	Nuclear: Adult Only
ENSG00000156858.11_1	0.0977978	0.140779	0.782286	0.913164	0.218915	0.000430935	ENSG00000156858	PRR14	78994	protein_coding	Nuclear: Adult Only
ENSG00000156860.15_2	0.421847	0.156002	0.121196	0.9449	0.226747	0.000435741	ENSG00000156860	FBRS	64319	protein_coding	Nuclear: Adult Only
ENSG00000157106.12	0.05681	0.14217	0.890191	0.857643	0.278753	0.0122756	ENSG00000157106	SMG1	101060589	protein_coding	Nuclear: Adult Only
ENSG00000157107.13_2	0.307029	0.160929	0.316745	1.03636	0.222755	7.32e-05	ENSG00000157107	FCHO2	115548	protein_coding	Nuclear: Adult Only
ENSG00000157350.12_1	0.307788	0.177876	0.374232	0.756644	0.195038	0.00114641	ENSG00000157350	ST3GAL2	6483	protein_coding	Nuclear: Adult Only
ENSG00000157353.16_1	0.32215	0.227664	0.486438	1.32635	0.249662	4.65e-06	ENSG00000157353	FUK	197258	protein_coding	Nuclear: Adult Only
ENSG00000157388.14_2	0.205679	0.237522	0.718065	0.738342	0.278569	0.0349409	ENSG00000157388	CAC1D	776	protein_coding	Nuclear: Adult Only
ENSG00000157657.14_2	0.5297	0.17612	0.0712533	1.07592	0.35697	0.0144394	ENSG00000157657	ZNF618	114991	protein_coding	Nuclear: Adult Only
ENSG00000157741.14_1	0.395634	0.180478	0.235232	0.871822	0.27878	0.0107246	ENSG00000157741	UBN2	254048	protein_coding	Nuclear: Adult Only	Autism Spectrum Disorder (from SAFARI)
ENSG00000157796.17_2	0.0223793	0.175826	0.971141	0.790613	0.231018	0.00472049	ENSG00000157796	WDR19	57728	protein_coding	Nuclear: Adult Only
ENSG00000157873.17_1	0.355161	0.238652		1.48838	0.278689	4.07e-06	ENSG00000157873	TNFRSF14	8764	protein_coding	Nuclear: Adult Only
ENSG00000157927.16_2	0.344741	0.194295	0.361018	0.746233	0.273699	0.0292928	ENSG00000157927	RADIL	55698	protein_coding	Nuclear: Adult Only
ENSG00000157933.9_1	0.199989	0.160149	0.557172	0.700131	0.274018	0.0434208	ENSG00000157933	SKI	6497	protein_coding	Nuclear: Adult Only
ENSG00000157985.18_2	0.366106	0.186541	0.300712	0.924171	0.236515	0.00104396	ENSG00000157985	AGAP1	116987	protein_coding	Nuclear: Adult Only	Autism Spectrum Disorder (from SAFARI)
ENSG00000158008.9_1	0.419336	0.245269	0.379865	1.0071	0.164029	7.62e-08	ENSG00000158008	EXTL1	2134	protein_coding	Nuclear: Adult Only
ENSG00000158169.12_2	-0.163676	0.206978	0.746216	0.962366	0.369623	0.0388469	ENSG00000158169	FANCC	2176	protein_coding	Nuclear: Adult Only
ENSG00000158286.12_1	0.26819	0.227464	0.586826	2.0159	0.271339	4.34e-11	ENSG00000158286	RNF207	388591	protein_coding	Nuclear: Adult Only
ENSG00000158292.6_1	0.504021	0.176931	0.095041	1.32024	0.254701	8.23e-06	ENSG00000158292	GPR153	387509	protein_coding	Nuclear: Adult Only	Schizophrenia (from rare SNVs)
ENSG00000158296.13_2	0.0559475	0.249783	0.943903	0.783856	0.28016	0.0247437	ENSG00000158296	SLC13A3	64849	protein_coding	Nuclear: Adult Only
ENSG00000158863.21_1	0.61344	0.200015	0.0627691	1.38006	0.309928	0.000155528	ENSG00000158863	FAM160B2	64760	protein_coding	Nuclear: Adult Only
ENSG00000159214.12_1	0.277573	0.231884	0.578384	0.610669	0.228092	0.032949	ENSG00000159214	CCDC24	149473	protein_coding	Nuclear: Adult Only
ENSG00000159314.11_2	0.428742	0.244475	0.368437	1.3707	0.258124	4.69e-06	ENSG00000159314	ARHGAP27	201176	protein_coding	Nuclear: Adult Only	Neurodegenerative Disorder
ENSG00000159409.14_1	0.148909	0.13172	0.605729	0.79614	0.244731	0.00766317	ENSG00000159409	CELF3	11189	protein_coding	Nuclear: Adult Only
ENSG00000159433.11_2	0.457183	0.223025	0.271429	1.07225	0.246604	0.000231177	ENSG00000159433	STARD9	57519	protein_coding	Nuclear: Adult Only	Bipolar Affective Disorder (from GWAS)
ENSG00000159640.15_2	-0.056928	0.24893		0.810837	0.318196	0.044067	ENSG00000159640	ACE	1636	protein_coding	Nuclear: Adult Only	Autism Spectrum Disorder (from SAFARI)
ENSG00000159714.10_1	0.0727483	0.249991		0.76434	0.276198	0.0265496	ENSG00000159714	ZDHHC1	29800	protein_coding	Nuclear: Adult Only
ENSG00000159733.13_1	0.629308	0.233073	0.12151	0.808289	0.195255	0.000476046	ENSG00000159733	ZFYVE28	57732	protein_coding	Nuclear: Adult Only
ENSG00000159792.9_1	0.405615	0.219192	0.332953	0.980189	0.307205	0.00907157	ENSG00000159792	PSKH1	5681	protein_coding	Nuclear: Adult Only
ENSG00000159840.15_2	0.163443	0.160715	0.65068	1.19625	0.216459	1.71e-06	ENSG00000159840	ZYX	7791	protein_coding	Nuclear: Adult Only
ENSG00000160007.17_2	0.268127	0.160476	0.394968	0.605792	0.226288	0.0329612	ENSG00000160007	ARHGAP35	2909	protein_coding	Nuclear: Adult Only
ENSG00000160055.19_1	-0.00878541	0.204947	0.990428	0.998471	0.302043	0.00664671	ENSG00000160055	TMEM234	56063	protein_coding	Nuclear: Adult Only
ENSG00000160072.19_1	0.67461	0.214757	0.0549459	1.9011	0.295035	1.54e-08	ENSG00000160072	ATAD3B	83858	protein_coding	Nuclear: Adult Only
ENSG00000160117.14_2	0.369432	0.249572		1.00308	0.399116	0.0476402	ENSG00000160117	ANKLE1	126549	protein_coding	Nuclear: Adult Only
ENSG00000160209.18_1	0.3997	0.149733	0.129201	0.824773	0.198641	0.000456397	ENSG00000160209	PDXK	101928493	protein_coding	Nuclear: Adult Only
ENSG00000160223.16_1	0.201459	0.211131		0.786666	0.308382	0.0438165	ENSG00000160223	ICOSLG	23308	protein_coding	Nuclear: Adult Only
ENSG00000160224.16_1	0.114445	0.154258		1.36232	0.416359	0.00729785	ENSG00000160224	AIRE	326	protein_coding	Nuclear: Adult Only
ENSG00000160271.14_2	0.395806	0.152563	0.143619	1.30724	0.249163	6.25e-06	ENSG00000160271	RALGDS	5900	protein_coding	Nuclear: Adult Only
ENSG00000160282.13_1	0.49724	0.232885		1.84719	0.270955	2.04e-09	ENSG00000160282	FTCD	10841	protein_coding	Nuclear: Adult Only
ENSG00000160285.14_1	0.442546	0.186108	0.190622	0.702364	0.24811	0.0228487	ENSG00000160285	LSS	4047	protein_coding	Nuclear: Adult Only
ENSG00000160298.17_2	0.165086	0.249566	0.794042	0.859535	0.343289	0.0487366	ENSG00000160298	C21orf58	54058	protein_coding	Nuclear: Adult Only
ENSG00000160299.16_1	0.574749	0.186189	0.0601616	0.803095	0.180923	0.000164326	ENSG00000160299	PCNT	5116	protein_coding	Nuclear: Adult Only
ENSG00000160305.17_2	0.379633	0.182291	0.262321	0.643659	0.225627	0.0216461	ENSG00000160305	DIP2A	23181	protein_coding	Nuclear: Adult Only	Autism Spectrum Disorder (from SAFARI)
ENSG00000160401.14_1	0.353992	0.250193		1.41148	0.413768	0.00487585	ENSG00000160401	C9orf117	286207	protein_coding	Nuclear: Adult Only
ENSG00000160404.17_1	0.207914	0.193464	0.628222	0.64491	0.250528	0.0415114	ENSG00000160404	TOR2A	27433	protein_coding	Nuclear: Adult Only
ENSG00000160408.14_2	0.446905	0.159254	0.101944	1.05225	0.161802	1.08e-08	ENSG00000160408	ST6GALC6	30815	protein_coding	Nuclear: Adult Only
ENSG00000160460.15_2	0.644987	0.207536	0.0579829	0.594035	0.168899	0.00357353	ENSG00000160460	SPTBN4	57731	protein_coding	Nuclear: Adult Only
ENSG00000160469.16_2	0.289448	0.144549	0.285938	1.27635	0.253868	1.66e-05	ENSG00000160469	BRSK1	84446	protein_coding	Nuclear: Adult Only
ENSG00000160685.13_1	0.135312	0.221303		1.05001	0.319137	0.00693735	ENSG00000160685	ZBTB7B	51043	protein_coding	Nuclear: Adult Only
ENSG00000160691.18_2	0.310145	0.241932	0.542675	0.956899	0.307052	0.0110341	ENSG00000160691	SHC1	6464	protein_coding	Nuclear: Adult Only
ENSG00000160712.12_1	0.0517177	0.190396		0.815188	0.302362	0.0314683	ENSG00000160712	IL6R	3570	protein_coding	Nuclear: Adult Only
ENSG00000160766.14_1	0.0827087	0.249961	0.910549	1.63211	0.222525	8.31e-11	ENSG00000160766	GBAP1	2630	transcribed_unprocessed_pseudogene	Nuclear: Adult Only
ENSG00000160767.20_1	0.280637	0.18163	0.436116	0.70159	0.18255	0.0012901	ENSG00000160767	FAM189B	10712	protein_coding	Nuclear: Adult Only
ENSG00000160796.16_1	0.63942	0.238704	0.127296	2.00033	0.313153	2.07e-08	ENSG00000160796	NBEAL2	23218	protein_coding	Nuclear: Adult Only
ENSG00000160801.13_2	0.263822	0.234981		0.96497	0.278724	0.00419327	ENSG00000160801	PTH1R	5745	protein_coding	Nuclear: Adult Only
ENSG00000160867.14_2	0.594066	0.246288	0.182591	1.40785	0.44897	0.010484	ENSG00000160867	FGFR4	2264	protein_coding	Nuclear: Adult Only
ENSG00000160877.5_2	0.277371	0.164701	0.390066	0.663335	0.251866	0.036261	ENSG00000160877	CC1	112939	protein_coding	Nuclear: Adult Only
ENSG00000160917.14_1	0.424533	0.206167	0.269125	0.948951	0.207449	9.99e-05	ENSG00000160917	CPSF4	10898	protein_coding	Nuclear: Adult Only
ENSG00000160949.16_1	0.325376	0.235756	0.5005	1.32556	0.269551	2.59e-05	ENSG00000160949	TONSL	4796	protein_coding	Nuclear: Adult Only
ENSG00000160953.15_2	0.206065	0.18119	0.603341	0.758027	0.156689	3.6e-05	ENSG00000160953	MUM1	84939	protein_coding	Nuclear: Adult Only
ENSG00000160961.11_1	0.0236645	0.185702	0.971141	0.604222	0.224524	0.031814	ENSG00000160961	ZNF333	84449	protein_coding	Nuclear: Adult Only
ENSG00000160991.15_1	0.138718	0.167991	0.730511	0.746017	0.222757	0.00582891	ENSG00000160991	ORAI2	80228	protein_coding	Nuclear: Adult Only
ENSG00000161010.14_2	-0.0137849	0.163412	0.980548	0.744646	0.222517	0.00587358	ENSG00000161010	C5orf45	51149	protein_coding	Nuclear: Adult Only
ENSG00000161013.16_2	0.42471	0.140536	0.0693101	0.803274	0.1874	0.000288938	ENSG00000161013	MGAT4B	11282	protein_coding	Nuclear: Adult Only
ENSG00000161021.11_2	0.445486	0.184497	0.181754	0.957109	0.295244	0.00791356	ENSG00000161021	MAML1	9794	protein_coding	Nuclear: Adult Only
ENSG00000161298.16_1	0.051817	0.198648	0.932059	0.666077	0.254211	0.037415	ENSG00000161298	ZNF382	84911	protein_coding	Nuclear: Adult Only
ENSG00000161328.10_1	0.57934	0.250137		1.21903	0.317681	0.00131748	ENSG00000161328	LRRC56	115399	protein_coding	Nuclear: Adult Only
ENSG00000161558.10_2	-0.192588	0.239637		0.853836	0.253116	0.00543665	ENSG00000161558	TMEM143	55260	protein_coding	Nuclear: Adult Only
ENSG00000161692.17_1	0.334774	0.222512	0.452028	1.05359	0.256534	0.000532763	ENSG00000161692	DBF4B	80174	protein_coding	Nuclear: Adult Only
ENSG00000161714.11_2	0.170852	0.248214		0.797182	0.219361	0.00250701	ENSG00000161714	PLCD3	113026	protein_coding	Nuclear: Adult Only
ENSG00000161791.13_1	0.543534	0.181049	0.0722214	0.887768	0.241337	0.00217894	ENSG00000161791	FMNL3	91010	protein_coding	Nuclear: Adult Only
ENSG00000161912.17_1	0.0525349	0.198113	0.930639	0.779906	0.292708	0.0338725	ENSG00000161912	ADCY10P1	221442	transcribed_unprocessed_pseudogene	Nuclear: Adult Only	Neurodegenerative Disorder
ENSG00000161960.14_2	0.197925	0.245768	0.739911	1.59381	0.373557	0.000308601	ENSG00000161960	EIF4A1	652966	protein_coding	Nuclear: Adult Only
ENSG00000162006.9_2				2.21672	0.496721	0.000149842	ENSG00000162006	MSLNL		protein_coding	Nuclear: Adult Only
ENSG00000162105.17_2	0.282285	0.187616	0.452028	1.49042	0.251123	2.24e-07	ENSG00000162105	SHANK2	22941	protein_coding	Nuclear: Adult Only	Bipolar Affective Disorder (from GWAS)
ENSG00000162241.12_1	0.0808813	0.229876		1.1647	0.275061	0.000345257	ENSG00000162241	SLC25A45	283130	protein_coding	Nuclear: Adult Only
ENSG00000162267.12_1	0.0789253	0.188639		1.28193	0.426128	0.0146421	ENSG00000162267	ITIH3	3699	protein_coding	Nuclear: Adult Only	Neurodegenerative Disorder
ENSG00000162302.12_2	0.440445	0.235893	0.329056	0.850781	0.177968	4.49e-05	ENSG00000162302	RPS6KA4	8986	protein_coding	Nuclear: Adult Only
ENSG00000162341.16_2	0.55572	0.203706	0.116546	0.834237	0.234926	0.00322109	ENSG00000162341	TPCN2	219931	protein_coding	Nuclear: Adult Only
ENSG00000162413.16_2	0.498261	0.222983	0.225985	0.698049	0.235906	0.0165862	ENSG00000162413	KLHL21	9903	protein_coding	Nuclear: Adult Only
ENSG00000162461.7_1	0.57188	0.250076		1.62164	0.356724	0.000109304	ENSG00000162461	SLC25A34	284723	protein_coding	Nuclear: Adult Only
ENSG00000162522.10_1	0.168515	0.172838	0.671421	0.90763	0.191569	5.3e-05	ENSG00000162522	KIAA1522	57648	protein_coding	Nuclear: Adult Only
ENSG00000162576.16_1	0.509315	0.233406	0.236709	1.49479	0.316609	5.63e-05	ENSG00000162576	MXRA8	54587	protein_coding	Nuclear: Adult Only
ENSG00000162601.9_1	0.300831	0.17777	0.386511	0.661198	0.235876	0.0244265	ENSG00000162601	MYSM1	114803	protein_coding	Nuclear: Adult Only
ENSG00000162650.16_2	0.633549	0.216462	0.0832892	1.3654	0.27379	1.94e-05	ENSG00000162650	ATXN7L2	127002	protein_coding	Nuclear: Adult Only
ENSG00000162669.15_1	0.234054	0.222186	0.637709	1.26518	0.411424	0.0123294	ENSG00000162669	HFM1	164045	protein_coding	Nuclear: Adult Only
ENSG00000162687.16_1	0.427241	0.214528	0.289369	1.01218	0.252138	0.000724662	ENSG00000162687	KCNT2	343450	protein_coding	Nuclear: Adult Only
ENSG00000162688.16_2	0.277938	0.176132	0.426551	0.582365	0.186008	0.0106139	ENSG00000162688	AGL	178	protein_coding	Nuclear: Adult Only
ENSG00000162695.11_2	0.298165	0.185994	0.418745	0.759294	0.253562	0.0151104	ENSG00000162695	SLC30A7	148867	protein_coding	Nuclear: Adult Only
ENSG00000162804.13_2	0.254876	0.248639	0.647261	1.28589	0.258974	2.13e-05	ENSG00000162804	SNED1	25992	protein_coding	Nuclear: Adult Only
ENSG00000162913.9_2	0.306376	0.24225	0.550711	1.04976	0.340881	0.0121946	ENSG00000162913	C1orf145		protein_coding	Nuclear: Adult Only
ENSG00000162931.11_2	0.513432	0.249947		1.21375	0.298626	0.000615662	ENSG00000162931	TRIM17	51127	protein_coding	Nuclear: Adult Only
ENSG00000163013.11_1	0.397409	0.192044	0.265639	1.03555	0.238305	0.000233066	ENSG00000163013	FBXO41	101927826	protein_coding	Nuclear: Adult Only
ENSG00000163093.11_2	0.505319	0.216042	0.19983	0.73959	0.262859	0.0238089	ENSG00000163093	BBS5	129880	protein_coding	Nuclear: Adult Only
ENSG00000163126.14_2	0.0693534	0.249732		1.18407	0.456594	0.0397995	ENSG00000163126	ANKRD23	200539	protein_coding	Nuclear: Adult Only	Bipolar Affective Disorder (from GWAS)
ENSG00000163349.21_2	0.131675	0.156532	0.725237	0.481745	0.184826	0.0385708	ENSG00000163349	HIPK1	204851	protein_coding	Nuclear: Adult Only
ENSG00000163378.13_1	0.277825	0.250193		0.76478	0.276318	0.0265313	ENSG00000163378	EOGT	285203	protein_coding	Nuclear: Adult Only
ENSG00000163386.16	0.26016	0.247075	0.638049	0.957291	0.345331	0.0262545	ENSG00000163386	NBPF10	101928050	protein_coding	Nuclear: Adult Only
ENSG00000163431.12_2	0.297158	0.227401		1.07098	0.353781	0.0139526	ENSG00000163431	LMOD1	25802	protein_coding	Nuclear: Adult Only
ENSG00000163462.17_1	0.270332	0.183216	0.463645	0.797821	0.209823	0.00147847	ENSG00000163462	TRIM46	80128	protein_coding	Nuclear: Adult Only
ENSG00000163482.11_2	0.25516	0.195869	0.533665	1.66822	0.267005	4.3e-08	ENSG00000163482	STK36	27148	protein_coding	Nuclear: Adult Only
ENSG00000163516.13_1	0.00430334	0.172916	0.994809	1.40615	0.264635	4.64e-06	ENSG00000163516	ANKZF1	55139	protein_coding	Nuclear: Adult Only
ENSG00000163625.15_2	0.0945895	0.137152	0.784538	0.615913	0.236081	0.0383337	ENSG00000163625	WDFY3	23001	protein_coding	Nuclear: Adult Only	Autism Spectrum Disorder (from SAFARI)
ENSG00000163660.11_1	0.133563	0.155864	0.721164	0.808428	0.246085	0.00703297	ENSG00000163660	CCNL1	57018	protein_coding	Nuclear: Adult Only
ENSG00000163702.18_2	0.284814	0.249609		0.617438	0.235957	0.037687	ENSG00000163702	IL17RC	84818	protein_coding	Nuclear: Adult Only
ENSG00000163728.10_1	0.532295	0.182265	0.0840482	1.15356	0.290262	0.000832875	ENSG00000163728	TTC14	151613	protein_coding	Nuclear: Adult Only
ENSG00000163785.12_1	0.170753	0.199664	0.721831	0.66051	0.226785	0.0185869	ENSG00000163785	RYK	6259	protein_coding	Nuclear: Adult Only
ENSG00000163793.12_1				1.21567	0.420428	0.0195918	ENSG00000163793	DJC5G	285126	protein_coding	Nuclear: Adult Only
ENSG00000163794.6_1	0.168805	0.233194		0.975596	0.305504	0.00900267	ENSG00000163794	UCN	7349	protein_coding	Nuclear: Adult Only
ENSG00000163795.13_1	0.302189	0.151795	0.289369	0.714424	0.200758	0.00315233	ENSG00000163795	ZNF513	130557	protein_coding	Nuclear: Adult Only
ENSG00000163872.15_2	-0.0551874	0.138355	0.89043	0.612744	0.201004	0.0132299	ENSG00000163872	YEATS2	55689	protein_coding	Nuclear: Adult Only	Autism Spectrum Disorder (from SAFARI)
ENSG00000163930.9_1	0.307458	0.144285	0.251379	1.05483	0.197137	3.92e-06	ENSG00000163930	BAP1	8314	protein_coding	Nuclear: Adult Only	Neurodegenerative Disorder
ENSG00000163945.15_2	0.630952	0.23957	0.136831	1.32179	0.353645	0.00181598	ENSG00000163945	UVSSA	57654	protein_coding	Nuclear: Adult Only
ENSG00000163946.13_2	0.0374701	0.129412	0.923768	0.50879	0.183346	0.0260657	ENSG00000163946	FAM208A	23272	protein_coding	Nuclear: Adult Only
ENSG00000164061.4_2	0.454647	0.178545	0.155208	0.899219	0.25232	0.0031024	ENSG00000164061	BSN	8927	protein_coding	Nuclear: Adult Only
ENSG00000164078.12_2	0.322077	0.250079		1.50688	0.461839	0.00748825	ENSG00000164078	MST1R	4486	protein_coding	Nuclear: Adult Only
ENSG00000164082.14_1	0.4507	0.16993	0.132939	0.618525	0.212333	0.0185729	ENSG00000164082	GRM2	2912	protein_coding	Nuclear: Adult Only
ENSG00000164086.9_2	-0.0568841	0.167804	0.90867	0.678026	0.217466	0.0109877	ENSG00000164086	DUSP7	1849	protein_coding	Nuclear: Adult Only
ENSG00000164151.11_1	-0.0391975	0.135279	0.923768	0.464434	0.172885	0.0321831	ENSG00000164151	KIAA0947	23379	protein_coding	Nuclear: Adult Only
ENSG00000164164.15_1	0.278191	0.16918	0.404873	0.610116	0.188891	0.00818173	ENSG00000164164	OTUD4	54726	protein_coding	Nuclear: Adult Only
ENSG00000164236.11_1	0.573955	0.246999	0.203379	0.820933	0.218381	0.00169564	ENSG00000164236	ANKRD33B	651746	protein_coding	Nuclear: Adult Only
ENSG00000164327.12_2	0.187261	0.151479	0.562925	0.808188	0.183434	0.000185736	ENSG00000164327	RICTOR	253260	protein_coding	Nuclear: Adult Only
ENSG00000164329.13_1	0.241686	0.166834	0.47396	0.715666	0.221367	0.00811153	ENSG00000164329	PAPD4	167153	protein_coding	Nuclear: Adult Only
ENSG00000164403.14_2	0.408683	0.247714		0.779136	0.224619	0.00411626	ENSG00000164403	SHROOM1	134549	protein_coding	Nuclear: Adult Only
ENSG00000164620.8_1	0.485122	0.245236	0.294371	1.39145	0.286638	3.36e-05	ENSG00000164620	RELL2	285613	protein_coding	Nuclear: Adult Only
ENSG00000164663.14_2	0.167975	0.15921	0.637468	0.976566	0.310399	0.0102129	ENSG00000164663	USP49	25862	protein_coding	Nuclear: Adult Only
ENSG00000164684.13_2	0.271379	0.172752	0.428382	0.6962	0.219273	0.00946011	ENSG00000164684	ZNF704	619279	protein_coding	Nuclear: Adult Only
ENSG00000164742.14_1	0.317128	0.219435	0.475442	0.932773	0.25017	0.00186754	ENSG00000164742	ADCY1	107	protein_coding	Nuclear: Adult Only
ENSG00000164850.14_2	0.275859	0.24454		0.778382	0.302019	0.0412295	ENSG00000164850	GPER1	2852	protein_coding	Nuclear: Adult Only
ENSG00000164916.10_2	0.412934	0.160822	0.150222	0.836984	0.27851	0.014729	ENSG00000164916	FOXK1	221937	protein_coding	Nuclear: Adult Only
ENSG00000164953.15_2	-6.56e-05	0.225034	0.999836	0.732192	0.282191	0.0396653	ENSG00000164953	TMEM67	91147	protein_coding	Nuclear: Adult Only
ENSG00000165125.18_2	0.324449	0.249998		0.755115	0.234735	0.00848743	ENSG00000165125	TRPV6	55503	protein_coding	Nuclear: Adult Only
ENSG00000165138.17_1	0.624811	0.201089	0.0579829	1.02334	0.224457	0.000104891	ENSG00000165138	ANKS6	203286	protein_coding	Nuclear: Adult Only
ENSG00000165271.16_2	0.153323	0.189112	0.73756	0.624674	0.184845	0.00533775	ENSG00000165271	NOL6	65083	protein_coding	Nuclear: Adult Only
ENSG00000165338.16_2	0.294632	0.18492	0.421503	0.80631	0.189269	0.000314967	ENSG00000165338	HECTD2	143279	protein_coding	Nuclear: Adult Only
ENSG00000165359.14_2	0.422523	0.215631	0.301647	1.26774	0.284931	0.000157821	ENSG00000165359	DDX26B	203522	protein_coding	Nuclear: Adult Only
ENSG00000165424.6_1	0.362591	0.25016	0.47396	0.598931	0.210535	0.0221096	ENSG00000165424	ZCCHC24	219654	protein_coding	Nuclear: Adult Only
ENSG00000165458.13_2	0.428302	0.221453	0.309048	0.860866	0.262418	0.00713357	ENSG00000165458	INPPL1	3636	protein_coding	Nuclear: Adult Only
ENSG00000165509.13_1	0.119824	0.205693		1.30887	0.444482	0.017201	ENSG00000165509	MAGEC3	139081	protein_coding	Nuclear: Adult Only
ENSG00000165643.10_1	-0.0424278	0.0978656		1.55383	0.230025	2.82e-09	ENSG00000165643	SOHLH1	402381	protein_coding	Nuclear: Adult Only
ENSG00000165684.4_2	0.489396	0.183907	0.130541	1.03982	0.248058	0.000401844	ENSG00000165684	SPC4	6621	protein_coding	Nuclear: Adult Only
ENSG00000165689.16_2	0.508601	0.186036	0.115849	1.19701	0.226377	5.19e-06	ENSG00000165689	SDCCAG3	10807	protein_coding	Nuclear: Adult Only
ENSG00000165699.13_1	0.122632	0.16474	0.763988	0.666205	0.23707	0.0239956	ENSG00000165699	TSC1	7248	protein_coding	Nuclear: Adult Only
ENSG00000165792.17_2	-0.0056004	0.232284	0.995126	0.665664	0.26485	0.0476342	ENSG00000165792	METTL17	64745	protein_coding	Nuclear: Adult Only
ENSG00000165802.20_2	0.521105	0.164882	0.0530404	1.34844	0.195937	1.42e-09	ENSG00000165802	NSMF	102466223	protein_coding	Nuclear: Adult Only
ENSG00000165804.15_2	0.593815	0.21471	0.109311	1.34551	0.232388	4.75e-07	ENSG00000165804	ZNF219	51222	protein_coding	Nuclear: Adult Only
ENSG00000165810.16_1	0.104729	0.247273	0.880667	1.23997	0.244048	1.31e-05	ENSG00000165810	BTNL9	153579	protein_coding	Nuclear: Adult Only
ENSG00000165899.10_1	0.137436	0.130183		0.850177	0.27202	0.0107727	ENSG00000165899	OTOGL	283310	protein_coding	Nuclear: Adult Only
ENSG00000165914.14_1	-0.0136154	0.151218	0.97927	0.486836	0.195086	0.0496486	ENSG00000165914	TTC7B	145567	protein_coding	Nuclear: Adult Only
ENSG00000165915.13_1	0.561349	0.196427	0.0938364	1.27636	0.182992	8.36e-10	ENSG00000165915	SLC39A13	91252	protein_coding	Nuclear: Adult Only	Neurodegenerative Disorder
ENSG00000165959.11_2	0.12876	0.246488		0.659752	0.240411	0.0280509	ENSG00000165959	CLMN	79789	protein_coding	Nuclear: Adult Only
ENSG00000166016.5_2	0.319826	0.241733	0.524626	0.719257	0.28446	0.0460699	ENSG00000166016	ABTB2	25841	protein_coding	Nuclear: Adult Only
ENSG00000166068.12_2	0.144021	0.1605	0.706081	0.459448	0.163965	0.0244982	ENSG00000166068	SPRED1	161742	protein_coding	Nuclear: Adult Only
ENSG00000166147.13_2	0.353022	0.214391	0.40412	0.959132	0.238673	0.000714183	ENSG00000166147	FBN1	2200	protein_coding	Nuclear: Adult Only	Autism Spectrum Disorder (from SAFARI)
ENSG00000166261.10_2	0.0881243	0.162528	0.835307	0.753344	0.287636	0.0375192	ENSG00000166261	ZNF202	7753	protein_coding	Nuclear: Adult Only
ENSG00000166398.12_2	0.363863	0.175139	0.263717	0.683477	0.22742	0.014729	ENSG00000166398	KIAA0355	9710	protein_coding	Nuclear: Adult Only
ENSG00000166432.14_1	0.379954	0.218673	0.371955	1.03545	0.320988	0.00828862	ENSG00000166432	ZMAT1	84460	protein_coding	Nuclear: Adult Only
ENSG00000166436.15_1	0.298151	0.243821		0.870818	0.285113	0.0130184	ENSG00000166436	TRIM66	9866	protein_coding	Nuclear: Adult Only
ENSG00000166507.16_2	0.136322	0.21428		1.36571	0.514638	0.0346917	ENSG00000166507	NDST2	8509	protein_coding	Nuclear: Adult Only	Schizophrenia (from rare SNVs)
ENSG00000166546.13_2	0.233242	0.217007	0.628222	0.867039	0.245555	0.00342245	ENSG00000166546	BEAN1	146227	protein_coding	Nuclear: Adult Only
ENSG00000166716.9_2	0.132235	0.158114	0.726655	0.761101	0.237786	0.00885682	ENSG00000166716	ZNF592	9640	protein_coding	Nuclear: Adult Only	Bipolar Affective Disorder (from GWAS)
ENSG00000166762.16_2	0.309555	0.250125		1.08028	0.28531	0.00155596	ENSG00000166762	CATSPER2	101930343	protein_coding	Nuclear: Adult Only
ENSG00000166839.16_2	-0.199919	0.195682	0.6488	0.81512	0.282725	0.0200337	ENSG00000166839	ANKDD1A	348094	protein_coding	Nuclear: Adult Only
ENSG00000166851.14_2	0.0822248	0.243723	0.90917	1.46296	0.373894	0.00102628	ENSG00000166851	PLK1	5347	protein_coding	Nuclear: Adult Only
ENSG00000166888.10_2	0.278837	0.245149		0.634753	0.197798	0.00866485	ENSG00000166888	STAT6	6778	protein_coding	Nuclear: Adult Only
ENSG00000166897.14_2	0.442703	0.202458	0.236248	0.654667	0.242937	0.0315421	ENSG00000166897	ELFN2	114794	protein_coding	Nuclear: Adult Only
ENSG00000166924.8_1	0.30812	0.165698	0.330417	0.641088	0.216942	0.0167366	ENSG00000166924	NYAP1	222950	protein_coding	Nuclear: Adult Only	Neurodegenerative Disorder
ENSG00000166987.14_2	0.317757	0.206251	0.43805	0.855247	0.262026	0.00746774	ENSG00000166987	MBD6	114785	protein_coding	Nuclear: Adult Only	Autism Spectrum Disorder (from SAFARI)
ENSG00000167074.14_1	0.340843	0.20709	0.404154	0.719914	0.215452	0.00596526	ENSG00000167074	TEF	7008	protein_coding	Nuclear: Adult Only
ENSG00000167100.14_2	0.358064	0.170809	0.258998	0.887124	0.208551	0.000322192	ENSG00000167100	SAMD14	201191	protein_coding	Nuclear: Adult Only
ENSG00000167106.11_1	0.443235	0.18629	0.190435	0.845352	0.230537	0.00225463	ENSG00000167106	FAM102A	399665	protein_coding	Nuclear: Adult Only
ENSG00000167123.18_2	0.447421	0.22394	0.287054	0.968468	0.344134	0.0237839	ENSG00000167123	CERCAM	51148	protein_coding	Nuclear: Adult Only
ENSG00000167202.11_2	0.502412	0.193588	0.143619	0.90402	0.343123	0.0361908	ENSG00000167202	TBC1D2B	23102	protein_coding	Nuclear: Adult Only	Schizophrenia (from rare SNVs)
ENSG00000167280.16_2	0.651921	0.219781	0.0773138	1.40386	0.224393	4.18e-08	ENSG00000167280	ENGASE	64772	protein_coding	Nuclear: Adult Only
ENSG00000167291.15_2	0.504983	0.159698	0.0529772	0.895855	0.229438	0.00105195	ENSG00000167291	TBC1D16	125058	protein_coding	Nuclear: Adult Only
ENSG00000167524.14_2	0.438422	0.242168	0.347386	1.35394	0.373178	0.00254701	ENSG00000167524		124923	protein_coding	Nuclear: Adult Only
ENSG00000167535.7_1	0.207066	0.152416	0.508605	0.658942	0.192616	0.00473904	ENSG00000167535	CACNB3	784	protein_coding	Nuclear: Adult Only
ENSG00000167543.15_2	0.251686	0.248906		0.964041	0.25715	0.00175498	ENSG00000167543	TP53I13	90313	protein_coding	Nuclear: Adult Only
ENSG00000167549.18_2	0.560634	0.23485		2.83496	0.274335	9.06e-21	ENSG00000167549	CORO6	84940	protein_coding	Nuclear: Adult Only
ENSG00000167566.16_1	0.361783	0.169467	0.24978	1.19423	0.238819	1.85e-05	ENSG00000167566	NCKAP5L	57701	protein_coding	Nuclear: Adult Only	Autism Spectrum Disorder (from SAFARI)
ENSG00000167595.14_1	0.271051	0.223147	0.571077	0.96364	0.348761	0.0268261	ENSG00000167595	C19orf55	148137	protein_coding	Nuclear: Adult Only
ENSG00000167604.13_2	0.000399114	0.249694		1.14016	0.341828	0.00607284	ENSG00000167604	NFKBID	84807	protein_coding	Nuclear: Adult Only
ENSG00000167615.16_2	0.517454	0.225596	0.210312	1.50937	0.372417	0.000641533	ENSG00000167615	LENG8	114823	protein_coding	Nuclear: Adult Only
ENSG00000167619.11_1	0.220048	0.200274	0.617299	0.951882	0.21801	0.000216674	ENSG00000167619	TMEM145	284339	protein_coding	Nuclear: Adult Only
ENSG00000167680.15_1	0.486878	0.183734	0.133317	0.695115	0.179523	0.00117435	ENSG00000167680	SEMA6B	10501	protein_coding	Nuclear: Adult Only
ENSG00000167701.13_1	0.834178	0.249839		1.50302	0.335861	0.000143041	ENSG00000167701	GPT	2875	protein_coding	Nuclear: Adult Only
ENSG00000167716.18_2	0.419935	0.191317	0.234643	0.99495	0.253243	0.000970801	ENSG00000167716	WDR81	124997	protein_coding	Nuclear: Adult Only
ENSG00000167766.18_2	0.178686	0.166475	0.628744	1.13183	0.223642	1.44e-05	ENSG00000167766	ZNF83	55769	protein_coding	Nuclear: Adult Only
ENSG00000167807.15_2	0.00668496	0.243094		1.52961	0.494699	0.0117772	ENSG00000167807			protein_coding	Nuclear: Adult Only
ENSG00000167861.15_1	0.339927	0.202579	0.392374	0.558224	0.204331	0.0289033	ENSG00000167861	HID1	283987	protein_coding	Nuclear: Adult Only
ENSG00000167889.12_1	0.388689	0.189653	0.271429	0.797665	0.258703	0.01206	ENSG00000167889	MGAT5B	146664	protein_coding	Nuclear: Adult Only
ENSG00000167964.12_2	0.422744	0.203746	0.264621	1.0047	0.225658	0.000155777	ENSG00000167964	RAB26	25837	protein_coding	Nuclear: Adult Only
ENSG00000167968.12_2	0.798037	0.250178		2.25778	0.368078	7.8e-08	ENSG00000167968	DSE1L2	1775	protein_coding	Nuclear: Adult Only
ENSG00000167971.15_1	0.585337	0.224474	0.141222	1.26409	0.3467	0.00241608	ENSG00000167971	CASKIN1	57524	protein_coding	Nuclear: Adult Only
ENSG00000167978.16_2	0.159004	0.125263	0.548569	0.901383	0.277411	0.00773558	ENSG00000167978	SRRM2	23524	protein_coding	Nuclear: Adult Only
ENSG00000167992.12_1	0.258711	0.244019	0.634846	1.36547	0.365278	0.00181493	ENSG00000167992	VWCE	220001	protein_coding	Nuclear: Adult Only
ENSG00000168016.13_2	0.190353	0.212913	0.706989	0.952035	0.273013	0.00391147	ENSG00000168016	TRANK1	9881	protein_coding	Nuclear: Adult Only	Bipolar Affective Disorder (from GWAS)
ENSG00000168026.17_2	0.200153	0.231625	0.718797	1.08379	0.307382	0.00347469	ENSG00000168026	TTC21A	199223	protein_coding	Nuclear: Adult Only
ENSG00000168067.11_2	0.263127	0.188725	0.494314	0.835173	0.194795	0.000288093	ENSG00000168067	MAP4K2	5871	protein_coding	Nuclear: Adult Only
ENSG00000168071.21_2	0.586103	0.247688		1.26706	0.296599	0.000303866	ENSG00000168071	CCDC88B	283234	protein_coding	Nuclear: Adult Only
ENSG00000168096.14_2	0.481549	0.184272	0.140493	0.844395	0.246858	0.00474279	ENSG00000168096	ANKS3	124401	protein_coding	Nuclear: Adult Only
ENSG00000168395.15_2	0.449008	0.1852	0.179508	0.764484	0.201243	0.00149473	ENSG00000168395	ING5	84289	protein_coding	Nuclear: Adult Only
ENSG00000168405.14_1	0.0528839	0.0958439		1.0619	0.305232	0.00400452	ENSG00000168405	CMAHP	8418	unitary_pseudogene	Nuclear: Adult Only
ENSG00000168453.14_2	0.139168	0.218158	0.803265	1.04724	0.244355	0.000289555	ENSG00000168453	HR	55806	protein_coding	Nuclear: Adult Only
ENSG00000168487.17_2	0.230608	0.199809	0.596498	1.30807	0.337925	0.00117832	ENSG00000168487	BMP1	649	protein_coding	Nuclear: Adult Only
ENSG00000168614.13	0.172638	0.203265	0.724202	1.18906	0.384262	0.0117092	ENSG00000168614	NBPF9	728912	protein_coding	Nuclear: Adult Only
ENSG00000168646.12_2	0.236329	0.193538	0.568178	0.787971	0.239602	0.00696231	ENSG00000168646	AXIN2	8313	protein_coding	Nuclear: Adult Only
ENSG00000168769.13_2	-0.0327625	0.164773	0.95189	0.918102	0.260192	0.0034457	ENSG00000168769	TET2	54790	protein_coding	Nuclear: Adult Only	Autism Spectrum Disorder (from SAFARI)
ENSG00000168876.8_2	0.247681	0.188185	0.527657	0.780108	0.289057	0.0312573	ENSG00000168876	ANKRD49	54851	protein_coding	Nuclear: Adult Only
ENSG00000168890.13_1	0.188194	0.212194	0.710161	0.926153	0.298915	0.0115906	ENSG00000168890	TMEM150A	129303	protein_coding	Nuclear: Adult Only
ENSG00000168904.14_2	-0.306406	0.165663	0.333297	0.539888	0.206363	0.0377241	ENSG00000168904	LRRC28	123355	protein_coding	Nuclear: Adult Only
ENSG00000168924.14_1	0.221245	0.184753	0.578384	0.565629	0.212475	0.0340534	ENSG00000168924	LETM1	3954	protein_coding	Nuclear: Adult Only
ENSG00000169026.12_2	0.275686	0.182314		0.952942	0.378445	0.0470977	ENSG00000169026	MFSD7	84179	protein_coding	Nuclear: Adult Only
ENSG00000169031.18_1	0.112479	0.137281		1.12992	0.401384	0.0237332	ENSG00000169031	COL4A3	1285	protein_coding	Nuclear: Adult Only
ENSG00000169064.12_1	0.368008	0.243574		1.16948	0.315338	0.00198479	ENSG00000169064	ZBBX	79740	protein_coding	Nuclear: Adult Only
ENSG00000169203.12	0.35634	0.23939		1.07883	0.383536	0.0238394	ENSG00000169203			protein_coding	Nuclear: Adult Only
ENSG00000169231.13_1	0.574761	0.232107	0.169312	1.55413	0.257341	1.31e-07	ENSG00000169231	THBS3	7059	protein_coding	Nuclear: Adult Only
ENSG00000169246.16_2	0.561531	0.242394	0.205391	1.2504	0.335164	0.00185661	ENSG00000169246	NPIPB3	100288332	protein_coding	Nuclear: Adult Only
ENSG00000169427.6_1	0.0415157	0.194663	0.948627	0.663618	0.21612	0.0124737	ENSG00000169427	KCNK9	51305	protein_coding	Nuclear: Adult Only
ENSG00000169436.16_2	-0.0311636	0.244185		2.01318	0.368283	2.27e-06	ENSG00000169436	COL22A1	169044	protein_coding	Nuclear: Adult Only
ENSG00000169507.9_2	0.143586	0.2374		1.15327	0.304016	0.00152132	ENSG00000169507	SLC38A11	151258	protein_coding	Nuclear: Adult Only
ENSG00000169598.15_1	0.239768	0.189168	0.549	0.717748	0.272207	0.0360043	ENSG00000169598	DFFB	1677	protein_coding	Nuclear: Adult Only
ENSG00000169710.6	0.298936	0.166359	0.352124	0.803513	0.273286	0.0173787	ENSG00000169710	FASN	2194	protein_coding	Nuclear: Adult Only
ENSG00000169884.13_2	0.0516388	0.247067	0.9498	0.575474	0.18781	0.0126913	ENSG00000169884	WNT10B	7480	protein_coding	Nuclear: Adult Only
ENSG00000169885.9_1	0.0512256	0.0657687		1.80271	0.420713	0.000290413	ENSG00000169885	CALML6	163688	protein_coding	Nuclear: Adult Only
ENSG00000169918.9_2	0.387673	0.177507	0.236363	0.734416	0.225937	0.0077154	ENSG00000169918	OTUD7A	161725	protein_coding	Nuclear: Adult Only
ENSG00000169919.16_1	0.354035	0.172667	0.271283	0.802291	0.303474	0.0354932	ENSG00000169919	GUSB	2990	protein_coding	Nuclear: Adult Only
ENSG00000169926.10_2	0.437981	0.17612	0.168117	0.991902	0.270002	0.00220955	ENSG00000169926	KLF13	51621	protein_coding	Nuclear: Adult Only
ENSG00000169962.4_1	0.921595	0.246647		1.52383	0.505812	0.0144881	ENSG00000169962	TAS1R3	83756	protein_coding	Nuclear: Adult Only
ENSG00000169967.16_1	0.478771	0.165405	0.0882168	0.865664	0.212646	0.00060348	ENSG00000169967	MAP3K2	10746	protein_coding	Nuclear: Adult Only
ENSG00000169991.10_2	0.0697702	0.209116	0.909382	0.58729	0.227673	0.0410366	ENSG00000169991	IFFO2	126917	protein_coding	Nuclear: Adult Only
ENSG00000170049.9_2	0.453996	0.20268	0.224511	0.682055	0.257691	0.0352279	ENSG00000170049	KCB3	9196	protein_coding	Nuclear: Adult Only
ENSG00000170074.19_2	0.0351058	0.203187		1.33849	0.361289	0.00200304	ENSG00000170074	FAM153A	285596	protein_coding	Nuclear: Adult Only
ENSG00000170145.4_1	0.219364	0.175543	0.557074	0.615115	0.201495	0.0130727	ENSG00000170145	SIK2	23235	protein_coding	Nuclear: Adult Only
ENSG00000170485.16_2	0.219633	0.228653	0.67797	0.664297	0.22727	0.0181341	ENSG00000170485	NPAS2	4862	protein_coding	Nuclear: Adult Only	Autism Spectrum Disorder (from SAFARI)
ENSG00000170525.18_2	0.33217	0.174778	0.318027	0.623295	0.206376	0.0141929	ENSG00000170525	PFKFB3	5209	protein_coding	Nuclear: Adult Only
ENSG00000170581.13_2	0.089248	0.157748	0.827652	0.787395	0.225311	0.00382588	ENSG00000170581	STAT2	6773	protein_coding	Nuclear: Adult Only
ENSG00000170638.9_1	0.564518	0.225963	0.164951	1.59082	0.210303	1.83e-11	ENSG00000170638	TRABD	80305	protein_coding	Nuclear: Adult Only
ENSG00000170835.13_1	0.458598	0.244651		1.58236	0.460847	0.00456711	ENSG00000170835	CEL	1056	protein_coding	Nuclear: Adult Only
ENSG00000170919.15_2	0.488532	0.17134	0.0949199	0.758886	0.262793	0.0197765	ENSG00000170919	TPT1-AS1	100190939	processed_transcript	Nuclear: Adult Only
ENSG00000170921.14_2	0.163506	0.160352	0.649582	0.575364	0.217934	0.0357298	ENSG00000170921	TANC2	26115	protein_coding	Nuclear: Adult Only	Neurodegenerative Disorder
ENSG00000171045.14_2	0.616998	0.206469	0.0740682	0.70934	0.200472	0.0033506	ENSG00000171045	TSRE1	203062	protein_coding	Nuclear: Adult Only
ENSG00000171109.18_2	0.0254039	0.166832	0.965847	0.804557	0.244515	0.00693403	ENSG00000171109	MFN1	55669	protein_coding	Nuclear: Adult Only
ENSG00000171316.11_2	0.402359	0.230846	0.370898	0.886568	0.305975	0.0192903	ENSG00000171316	CHD7	55636	protein_coding	Nuclear: Adult Only
ENSG00000171368.11_1	0.188331	0.234684	0.741069	0.716065	0.244665	0.0179563	ENSG00000171368	TPPP	11076	protein_coding	Nuclear: Adult Only
ENSG00000171502.14_1	-0.00558845	0.218183		1.97185	0.340705	4.8e-07	ENSG00000171502	COL24A1	255631	protein_coding	Nuclear: Adult Only
ENSG00000171608.15_1	0.248612	0.178548	0.494612	0.801183	0.279427	0.0209201	ENSG00000171608	PIK3CD	5293	protein_coding	Nuclear: Adult Only
ENSG00000171621.13_1	0.453621	0.249485	0.344657	0.70325	0.266357	0.0357198	ENSG00000171621	SPSB1	80176	protein_coding	Nuclear: Adult Only
ENSG00000171680.20_2	0.639776	0.213291	0.0725134	1.05154	0.230567	0.000104614	ENSG00000171680	PLEKHG5	57449	protein_coding	Nuclear: Adult Only
ENSG00000171798.17_1	0.444311	0.199664	0.228585	0.60739	0.218661	0.0259137	ENSG00000171798	KNDC1	85442	protein_coding	Nuclear: Adult Only
ENSG00000171811.12_2	0.172671	0.247696		1.26463	0.267733	5.6e-05	ENSG00000171811	TTC40	54777	protein_coding	Nuclear: Adult Only
ENSG00000171813.13_1	0.486173	0.222952	0.237195	0.610429	0.21677	0.0236888	ENSG00000171813	PWWP2B	170394	protein_coding	Nuclear: Adult Only
ENSG00000171824.13_1	-0.315165	0.168707	0.329056	0.827391	0.265014	0.0108745	ENSG00000171824	EXOSC10	5394	protein_coding	Nuclear: Adult Only
ENSG00000171962.17_2	0.13879	0.20733	0.791856	0.828265	0.332193	0.0498883	ENSG00000171962	LRRC48	83450	protein_coding	Nuclear: Adult Only
ENSG00000171988.17_2	-0.0250169	0.147413	0.961092	1.02176	0.22295	9.72e-05	ENSG00000171988	JMJD1C	221037	protein_coding	Nuclear: Adult Only	Autism Spectrum Disorder (from SAFARI)
ENSG00000171992.12_1	0.405181	0.199115	0.275873	0.667168	0.243191	0.0281137	ENSG00000171992	SYNPO	11346	protein_coding	Nuclear: Adult Only
ENSG00000172167.7_2	0.0837236	0.241623		0.960426	0.378815	0.0454791	ENSG00000172167	MTBP	27085	protein_coding	Nuclear: Adult Only
ENSG00000172175.12_2	0.0517482	0.173263	0.920271	0.640147	0.246302	0.0392993	ENSG00000172175	MALT1	10892	protein_coding	Nuclear: Adult Only
ENSG00000172250.14_1	0.286254	0.245612		0.99256	0.351515	0.0232487	ENSG00000172250	SERHL	94009	processed_transcript	Nuclear: Adult Only
ENSG00000172432.18_2	0.256171	0.179393	0.481999	0.877287	0.215458	0.000601764	ENSG00000172432	GTPBP2	54676	protein_coding	Nuclear: Adult Only
ENSG00000172460.14_1	0.304873	0.164958		2.00008	0.481904	0.000459104	ENSG00000172460	PRSS30P	124221	unitary_pseudogene	Nuclear: Adult Only
ENSG00000172534.13_1	0.232216	0.119706	0.307131	0.565196	0.195489	0.0195953	ENSG00000172534	HCFC1	3054	protein_coding	Nuclear: Adult Only
ENSG00000172613.7_2	0.375352	0.217796	0.376576	1.08794	0.246478	0.000180024	ENSG00000172613	RAD9A	5883	protein_coding	Nuclear: Adult Only
ENSG00000172732.11_1	0.314931	0.156075	0.28032	0.626667	0.214061	0.0179156	ENSG00000172732	MUS81	80198	protein_coding	Nuclear: Adult Only
ENSG00000172733.11_2	0.542253	0.21533	0.159042	1.12847	0.24737	0.000104129	ENSG00000172733	PURG	29942	protein_coding	Nuclear: Adult Only
ENSG00000172748.12_2	0.135424	0.214149	0.804421	0.992235	0.299288	0.00645256	ENSG00000172748	ZNF596	169270	protein_coding	Nuclear: Adult Only
ENSG00000172803.17_1	0.499725	0.228726	0.236343	0.839518	0.24916	0.00548564	ENSG00000172803	SNX32	254122	protein_coding	Nuclear: Adult Only
ENSG00000172824.14_2	0.228386	0.218146	0.639942	2.09536	0.301726	1.01e-09	ENSG00000172824	CES4A	283848	protein_coding	Nuclear: Adult Only
ENSG00000172828.12_2	0.144094	0.2426		1.45893	0.344787	0.000348621	ENSG00000172828	CES3	23491	protein_coding	Nuclear: Adult Only
ENSG00000172830.12_2	0.501896	0.242865	0.266132	1.12547	0.341951	0.0069201	ENSG00000172830	SSH3	54961	protein_coding	Nuclear: Adult Only
ENSG00000172831.11_2	0.149068	0.16816	0.710435	0.757003	0.235492	0.00854249	ENSG00000172831	CES2	8824	protein_coding	Nuclear: Adult Only
ENSG00000172869.14_1	0.151769	0.174062	0.715908	0.576504	0.204476	0.0235148	ENSG00000172869	DMXL1	1657	protein_coding	Nuclear: Adult Only
ENSG00000172890.11_2	0.442569	0.178285	0.168647	0.914805	0.224147	0.000582959	ENSG00000172890	DSYN1	55191	protein_coding	Nuclear: Adult Only
ENSG00000172932.14_2	0.312784	0.169535	0.335665	0.676834	0.190511	0.00320765	ENSG00000172932	ANKRD13D	338692	protein_coding	Nuclear: Adult Only
ENSG00000173011.11_2	0.129982	0.17674	0.767029	0.59656	0.204209	0.0181819	ENSG00000173011	TADA2B	93624	protein_coding	Nuclear: Adult Only
ENSG00000173020.10_2	0.473003	0.151647	0.0566316	0.804009	0.195732	0.000532217	ENSG00000173020	ADRBK1	156	protein_coding	Nuclear: Adult Only
ENSG00000173064.11_2	0.286496	0.138996	0.268507	0.742853	0.235383	0.00998102	ENSG00000173064	HECTD4	283450	protein_coding	Nuclear: Adult Only	Autism Spectrum Disorder (from SAFARI)
ENSG00000173120.14_1	0.3512	0.159917	0.234436	0.435158	0.168321	0.0405108	ENSG00000173120	KDM2A	22992	protein_coding	Nuclear: Adult Only
ENSG00000173137.11_1	0.632749	0.212293	0.075312	0.885967	0.314305	0.0235394	ENSG00000173137	ADCK5	203054	protein_coding	Nuclear: Adult Only
ENSG00000173175.14_2	0.438842	0.189779	0.206841	0.892606	0.271899	0.00708516	ENSG00000173175	ADCY5	111	protein_coding	Nuclear: Adult Only	Autism Spectrum Disorder (from SAFARI)
ENSG00000173209.22_2	0.598374	0.205182	0.0847548	1.19526	0.256086	6.87e-05	ENSG00000173209	AHSA2	130872	protein_coding	Nuclear: Adult Only
ENSG00000173275.12_1	0.222602	0.210359	0.63575	0.746243	0.280275	0.0340244	ENSG00000173275	ZNF449	203523	protein_coding	Nuclear: Adult Only
ENSG00000173295.7_1	0.0812254	0.227739		1.33065	0.473527	0.0239956	ENSG00000173295	FAM86B3P	286042	transcribed_unprocessed_pseudogene	Nuclear: Adult Only
ENSG00000173327.7_1	0.427239	0.202726	0.257375	0.789746	0.2041	0.00118482	ENSG00000173327	MAP3K11	4296	protein_coding	Nuclear: Adult Only
ENSG00000173517.10_2	0.184695	0.189493	0.671421	0.692536	0.257618	0.0320347	ENSG00000173517	PEAK1	79834	protein_coding	Nuclear: Adult Only
ENSG00000173621.8_2	0.488277	0.18544	0.136891	0.692262	0.214769	0.00834178	ENSG00000173621	LRFN4	78999	protein_coding	Nuclear: Adult Only	Bipolar Affective Disorder (from GWAS)
ENSG00000173653.7_2	0.49027	0.199142	0.172395	0.920639	0.237605	0.00116373	ENSG00000173653	RCE1	79703	protein_coding	Nuclear: Adult Only	Bipolar Affective Disorder (from GWAS)
ENSG00000173821.19_2	0.540178	0.20261	0.129933	0.786043	0.269861	0.0185811	ENSG00000173821	RNF213	57674	protein_coding	Nuclear: Adult Only
ENSG00000173918.14_1	0.121196	0.202855		0.821945	0.297313	0.0267497	ENSG00000173918	C1QTNF1	114897	protein_coding	Nuclear: Adult Only
ENSG00000174151.14_2	0.318468	0.20503	0.43423	0.624667	0.223735	0.0250702	ENSG00000174151	CYB561D1	284613	protein_coding	Nuclear: Adult Only
ENSG00000174197.12	0.108339	0.145937	0.764467	0.669294	0.235431	0.0222091	ENSG00000174197	MGA	23269	protein_coding	Nuclear: Adult Only
ENSG00000174227.15_1	0.423616	0.18486	0.21101	0.732897	0.265021	0.0266872	ENSG00000174227	PIGG	54872	protein_coding	Nuclear: Adult Only
ENSG00000174233.11_2	0.546615	0.208858	0.139855	1.10154	0.280782	0.000988639	ENSG00000174233	ADCY6	112	protein_coding	Nuclear: Adult Only
ENSG00000174403.15_1	0.0127398	0.0604528		1.4392	0.273812	5.99e-06	ENSG00000174403	C20orf166-AS1	253868	antisense	Nuclear: Adult Only
ENSG00000174483.19_2	-0.0159078	0.250073		1.17398	0.382855	0.0126189	ENSG00000174483	BBS1	582	protein_coding	Nuclear: Adult Only	Bipolar Affective Disorder (from GWAS)
ENSG00000174498.13_2	0.40978	0.16599	0.171486	0.769904	0.289642	0.0343663	ENSG00000174498	IGDCC3	9543	protein_coding	Nuclear: Adult Only
ENSG00000174501.10	0.389322	0.216202	0.35048	1.23208	0.319852	0.0012528	ENSG00000174501	ANKRD36C		protein_coding	Nuclear: Adult Only
ENSG00000174652.17_1	0.189001	0.173311	0.62076	0.823323	0.227644	0.00264151	ENSG00000174652	ZNF266	10781	protein_coding	Nuclear: Adult Only
ENSG00000174669.11_1	0.164048	0.22317	0.76705	1.15725	0.241593	4.35e-05	ENSG00000174669	SLC29A2	3177	protein_coding	Nuclear: Adult Only
ENSG00000174672.15_1	0.513022	0.168486	0.0655028	0.829679	0.207267	0.000751655	ENSG00000174672	BRSK2	9024	protein_coding	Nuclear: Adult Only
ENSG00000174705.12_2	0.219756	0.156425	0.489995	0.786884	0.305832	0.0416453	ENSG00000174705	SH3PXD2B	285590	protein_coding	Nuclear: Adult Only
ENSG00000174839.12_1	0.0256161	0.174432	0.9682	0.775347	0.227186	0.00486346	ENSG00000174839	DENND6A	201627	protein_coding	Nuclear: Adult Only
ENSG00000174915.11_1	0.57569	0.199334	0.0891418	0.872968	0.230234	0.00152722	ENSG00000174915	PTDSS2	81490	protein_coding	Nuclear: Adult Only
ENSG00000175054.14_2	0.0424796	0.193023	0.946129	0.517204	0.195315	0.035138	ENSG00000175054	ATR	545	protein_coding	Nuclear: Adult Only
ENSG00000175066.15_2	-0.0694268	0.200495	0.906635	0.843346	0.266789	0.00984304	ENSG00000175066	GK5	256356	protein_coding	Nuclear: Adult Only
ENSG00000175215.10_2	0.430591	0.193816	0.229189	0.771538	0.24135	0.00893623	ENSG00000175215	CTDSP2	10106	protein_coding	Nuclear: Adult Only
ENSG00000175265.17_2	0.303394	0.208335	0.471205	1.65842	0.303474	2.28e-06	ENSG00000175265	GOLGA8A	23015	protein_coding	Nuclear: Adult Only
ENSG00000175267.14_1	0.0942689	0.230017		1.65356	0.30593	3.04e-06	ENSG00000175267	VWA3A	146177	protein_coding	Nuclear: Adult Only
ENSG00000175309.14_2	0.450881	0.186217	0.179508	1.0121	0.260512	0.00112455	ENSG00000175309	PHYKPL	85007	protein_coding	Nuclear: Adult Only
ENSG00000175455.14_2	0.390268	0.176556	0.231996	0.888945	0.254162	0.00379355	ENSG00000175455	CCDC14	64770	protein_coding	Nuclear: Adult Only
ENSG00000175634.14_2	0.554108	0.193082	0.0923765	1.30518	0.219133	1.99e-07	ENSG00000175634	RPS6KB2	6199	protein_coding	Nuclear: Adult Only
ENSG00000175662.17_1	0.425368	0.164196	0.145014	0.784099	0.241829	0.00789938	ENSG00000175662	TOM1L2	146691	protein_coding	Nuclear: Adult Only
ENSG00000175727.9	0.337174	0.152197	0.231065	0.935947	0.231265	0.000654066	ENSG00000175727	MLXIP	22877	protein_coding	Nuclear: Adult Only
ENSG00000175785.12_1	0.00920105	0.0984883		1.16933	0.41112	0.0221293	ENSG00000175785	PRIMA1	145270	protein_coding	Nuclear: Adult Only
ENSG00000175920.15_1	0.158777	0.159402		1.33434	0.438907	0.013514	ENSG00000175920	DOK7	285489	protein_coding	Nuclear: Adult Only
ENSG00000176058.11_2	0.562759	0.18968	0.0773138	0.551718	0.186081	0.0163033	ENSG00000176058	TPRN	286262	protein_coding	Nuclear: Adult Only
ENSG00000176095.11_1	0.175844	0.167331	0.638782	0.469343	0.188191	0.0498411	ENSG00000176095	IP6K1	9807	protein_coding	Nuclear: Adult Only
ENSG00000176222.8_2	0.31811	0.249506	0.546643	0.957328	0.287939	0.00627424	ENSG00000176222	ZNF404	342908	protein_coding	Nuclear: Adult Only
ENSG00000176225.12_1	0.183519	0.175744	0.640745	1.07873	0.300802	0.00289657	ENSG00000176225	RTTN	25914	protein_coding	Nuclear: Adult Only
ENSG00000176381.5_2	0.0827352	0.118806		0.839921	0.262002	0.00874986	ENSG00000176381	PRR18	285800	protein_coding	Nuclear: Adult Only
ENSG00000176406.21_2	0.102305	0.190753	0.837414	0.609472	0.2152	0.0227765	ENSG00000176406	RIMS2	9699	protein_coding	Nuclear: Adult Only
ENSG00000176438.12_1	0.0956678	0.242915		0.948405	0.375705	0.046476	ENSG00000176438	SYNE3	161176	protein_coding	Nuclear: Adult Only
ENSG00000176444.18_1	0.202653	0.150924	0.51535	1.24378	0.269393	8.47e-05	ENSG00000176444	CLK2	1196	protein_coding	Nuclear: Adult Only
ENSG00000176533.12_2	0.403548	0.191463	0.257375	0.933531	0.230209	0.000637114	ENSG00000176533	GNG7	2788	protein_coding	Nuclear: Adult Only
ENSG00000176720.4_1	0.434921	0.224104	0.307131	1.29015	0.202865	2.39e-08	ENSG00000176720	BOK	666	protein_coding	Nuclear: Adult Only
ENSG00000176809.10_2	-0.0276404	0.220879	0.971229	0.736911	0.257622	0.0212534	ENSG00000176809	LRRC37A3	101930430	protein_coding	Nuclear: Adult Only
ENSG00000176871.8_1	-0.0782001	0.146428	0.837757	0.544056	0.175474	0.0115309	ENSG00000176871	WSB2	55884	protein_coding	Nuclear: Adult Only
ENSG00000176928.5_1	-0.033469	0.14126		0.752193	0.2235	0.00554354	ENSG00000176928	GCNT4	51301	protein_coding	Nuclear: Adult Only
ENSG00000176994.10_1	0.196395	0.179724	0.619367	0.765806	0.212559	0.00275504	ENSG00000176994	SMCR8	140775	protein_coding	Nuclear: Adult Only
ENSG00000177000.10_2	0.277518	0.18383	0.450569	0.951671	0.21098	0.000124844	ENSG00000177000	MTHFR	4524	protein_coding	Nuclear: Adult Only
ENSG00000177030.16_2	0.15572	0.1682	0.694842	0.802624	0.224292	0.00297195	ENSG00000177030	DEAF1	101927373	protein_coding	Nuclear: Adult Only
ENSG00000177084.16_2	0.437193	0.155628	0.10142	1.6084	0.346044	7.46e-05	ENSG00000177084	POLE	5426	protein_coding	Nuclear: Adult Only
ENSG00000177106.14_2	0.484296	0.208654		1.04963	0.287759	0.00240372	ENSG00000177106	EPS8L2	64787	protein_coding	Nuclear: Adult Only
ENSG00000177125.5_1	0.0793184	0.218402	0.900851	0.706164	0.226661	0.0110622	ENSG00000177125	ZBTB34	403341	protein_coding	Nuclear: Adult Only
ENSG00000177169.9_2	0.516214	0.166174	0.0579829	0.706133	0.195598	0.00269244	ENSG00000177169	ULK1	8408	protein_coding	Nuclear: Adult Only
ENSG00000177181.14_2	-0.163736	0.186731	0.714546	0.548206	0.201	0.0292326	ENSG00000177181	RIMKLA	284716	protein_coding	Nuclear: Adult Only
ENSG00000177200.15_2	0.252887	0.131736	0.312967	0.796679	0.228916	0.00399124	ENSG00000177200	CHD9	80205	protein_coding	Nuclear: Adult Only
ENSG00000177225.16_1	0.390671	0.169461	0.20838	1.07958	0.182258	2.4e-07	ENSG00000177225	PDDC1	347862	protein_coding	Nuclear: Adult Only
ENSG00000177302.14_2	0.102628	0.154452	0.793141	0.625449	0.238054	0.0367846	ENSG00000177302	TOP3A	7156	protein_coding	Nuclear: Adult Only
ENSG00000177303.9_2	0.430575	0.189644	0.215299	0.659525	0.236817	0.0255246	ENSG00000177303	CASKIN2	57513	protein_coding	Nuclear: Adult Only
ENSG00000177374.12_2	0.666237	0.24983	0.129861	1.13502	0.387487	0.0178446	ENSG00000177374	HIC1	3090	protein_coding	Nuclear: Adult Only
ENSG00000177663.13_1	0.222361	0.250195		0.769619	0.267085	0.0201149	ENSG00000177663	IL17RA	23765	protein_coding	Nuclear: Adult Only	Autism Spectrum Disorder (from SAFARI)
ENSG00000177679.15_2	0.44302	0.195016	0.215299	1.18941	0.223612	4.52e-06	ENSG00000177679	SRRM3	222183	protein_coding	Nuclear: Adult Only
ENSG00000177685.16_2	0.970876	0.238664		1.09127	0.343034	0.00928541	ENSG00000177685	EFCAB4A	283229	protein_coding	Nuclear: Adult Only
ENSG00000177728.15_2	0.44075	0.175625	0.161707	0.703037	0.232912	0.014265	ENSG00000177728	KIAA0195	102466911	protein_coding	Nuclear: Adult Only	Schizophrenia (from rare SNVs)
ENSG00000177732.8_2	0.21891	0.172251	0.547839	0.9781	0.231782	0.000363907	ENSG00000177732	SOX12	6666	protein_coding	Nuclear: Adult Only
ENSG00000177888.7_1	0.0756345	0.169854	0.871648	0.522503	0.198114	0.0359729	ENSG00000177888	ZBTB41	360023	protein_coding	Nuclear: Adult Only
ENSG00000177951.17_1	0.118907	0.178688	0.792906	0.552037	0.212657	0.0395778	ENSG00000177951	BET1L	51272	protein_coding	Nuclear: Adult Only
ENSG00000177984.6_1	-0.0157579	0.0604528		1.452	0.345198	0.000381875	ENSG00000177984	LCN15	389812	protein_coding	Nuclear: Adult Only
ENSG00000178038.16_1	0.637429	0.248727	0.15144	2.16502	0.272715	1.3e-12	ENSG00000178038	ALS2CL	259173	protein_coding	Nuclear: Adult Only	Schizophrenia (from rare SNVs)
ENSG00000178184.15_1	0.206028	0.207284	0.662056	0.890568	0.352663	0.0463739	ENSG00000178184	PARD6G	84552	protein_coding	Nuclear: Adult Only
ENSG00000178188.14_2	0.37606	0.169407	0.229463	0.871835	0.239403	0.00244498	ENSG00000178188	SH2B1	25970	protein_coding	Nuclear: Adult Only
ENSG00000178233.17_2	0.451702	0.179232	0.158335	1.04296	0.350215	0.0157941	ENSG00000178233	TMEM151B	441151	protein_coding	Nuclear: Adult Only
ENSG00000178295.14_2	0.0529627	0.226539	0.940849	1.00433	0.327853	0.0127073	ENSG00000178295	GEN1	348654	protein_coding	Nuclear: Adult Only
ENSG00000178338.10_1	-0.0693469	0.17351	0.890191	0.779876	0.287137	0.0300814	ENSG00000178338	ZNF354B	117608	protein_coding	Nuclear: Adult Only
ENSG00000178585.14_1	0.150404	0.150214	0.657759	0.92687	0.196135	5.57e-05	ENSG00000178585	CTNNBIP1	56998	protein_coding	Nuclear: Adult Only
ENSG00000178605.13_1	0.331455	0.179252	0.333429	0.778677	0.225122	0.00422939	ENSG00000178605	GTPBP6	8225	protein_coding	Nuclear: Adult Only
ENSG00000178773.14_2	0.432483	0.250187		0.869897	0.213777	0.000606719	ENSG00000178773	CPNE7	27132	protein_coding	Nuclear: Adult Only
ENSG00000178814.16_2	0.277069	0.248936		0.84266	0.320925	0.0369251	ENSG00000178814	OPLAH	26873	protein_coding	Nuclear: Adult Only
ENSG00000178922.16_1	0.555979	0.210008	0.134114	1.14128	0.281037	0.000623647	ENSG00000178922	HYI	81888	protein_coding	Nuclear: Adult Only
ENSG00000178947.8_1	0.338582	0.188402	0.352124	0.796425	0.20746	0.00131088	ENSG00000178947	LINC00086	399668	protein_coding	Nuclear: Adult Only
ENSG00000178951.8_2	0.531172	0.196063	0.11997	0.838684	0.302782	0.0263931	ENSG00000178951	ZBTB7A	51341	protein_coding	Nuclear: Adult Only
ENSG00000178971.13_1	0.207531	0.202568	0.647261	0.961953	0.247931	0.0011452	ENSG00000178971	CTC1	80169	protein_coding	Nuclear: Adult Only
ENSG00000179044.15_2	0.15296	0.248278		1.1612	0.363651	0.00900693	ENSG00000179044	EXOC3L1	283849	protein_coding	Nuclear: Adult Only
ENSG00000179134.15_2	0.245438	0.176651	0.495946	0.866079	0.284899	0.0135142	ENSG00000179134	SAMD4B	55095	protein_coding	Nuclear: Adult Only
ENSG00000179242.15_2	0.180201	0.183443	0.667467	0.760337	0.250994	0.0138784	ENSG00000179242	CDH4	1002	protein_coding	Nuclear: Adult Only
ENSG00000179361.17_2	0.175332	0.209031	0.726353	1.38133	0.378195	0.00236498	ENSG00000179361	ARID3B	10620	protein_coding	Nuclear: Adult Only
ENSG00000179406.6_1	0.417993	0.24956		1.19141	0.389227	0.0127882	ENSG00000179406	LINC00174	285908	lincRNA	Nuclear: Adult Only
ENSG00000179532.12_2	0.367382	0.228097	0.418261	0.800397	0.310288	0.0410366	ENSG00000179532	DNHD1	144132	protein_coding	Nuclear: Adult Only
ENSG00000179598.5_2	0.136887	0.249567	0.83322	0.851071	0.247022	0.0044038	ENSG00000179598	PLD6	201164	protein_coding	Nuclear: Adult Only
ENSG00000179611.3_1	0.369934	0.210486	0.366988	0.987025	0.275363	0.00291289	ENSG00000179611	DGKZP1		processed_pseudogene	Nuclear: Adult Only
ENSG00000179832.17_1	0.604577	0.209351	0.0891418	1.00963	0.373921	0.0311885	ENSG00000179832	MROH1	727957	protein_coding	Nuclear: Adult Only
ENSG00000179859.8_2	-0.117125	0.203293	0.824684	0.789884	0.270719	0.018356	ENSG00000179859		284023	protein_coding	Nuclear: Adult Only
ENSG00000179886.5_1	0.362362	0.191472	0.322014	0.785491	0.243917	0.00841623	ENSG00000179886	TIGD5	84948	protein_coding	Nuclear: Adult Only
ENSG00000179909.15_1	-0.14284	0.141773	0.654784	0.637402	0.238172	0.0330216	ENSG00000179909	ZNF154	7710	protein_coding	Nuclear: Adult Only
ENSG00000179943.7_1	0.27783	0.166763	0.397014	0.78782	0.209484	0.00168832	ENSG00000179943	FIZ1	84922	protein_coding	Nuclear: Adult Only
ENSG00000179979.8_1	0.574371	0.211332	0.118271	1.16135	0.339538	0.0047443	ENSG00000179979	CRIPAK	285464	protein_coding	Nuclear: Adult Only
ENSG00000180089.5_2	0.333148	0.238112		1.11248	0.394803	0.0235943	ENSG00000180089	TMEM86B	255043	protein_coding	Nuclear: Adult Only
ENSG00000180155.18_1	0.314294	0.226414	0.496402	0.520683	0.193041	0.0313712	ENSG00000180155	LYNX1	66004	protein_coding	Nuclear: Adult Only
ENSG00000180229.12_2	0.0117542	0.160194	0.982854	0.856768	0.271917	0.0101088	ENSG00000180229	HERC2P3	101930157	transcribed_unprocessed_pseudogene	Nuclear: Adult Only
ENSG00000180376.16_1	0.0132659	0.173156	0.98219	0.807063	0.307682	0.0371559	ENSG00000180376	CCDC66	285331	protein_coding	Nuclear: Adult Only
ENSG00000180448.10_2	0.333446	0.233596	0.481999	0.696632	0.233772	0.0157006	ENSG00000180448	HMHA1	23526	protein_coding	Nuclear: Adult Only	Neurodegenerative Disorder
ENSG00000180758.11_2	0.128865	0.111609		1.16736	0.450419	0.0399699	ENSG00000180758	GPR157	80045	protein_coding	Nuclear: Adult Only
ENSG00000180777.13_1	0.0982349	0.186536		1.11363	0.389223	0.0212188	ENSG00000180777	ANKRD30B	374860	protein_coding	Nuclear: Adult Only
ENSG00000180881.19_2	0.146227	0.249873		0.735376	0.262466	0.024511	ENSG00000180881	CAPS2	84698	protein_coding	Nuclear: Adult Only
ENSG00000180891.12_2	0.417415	0.170416	0.175947	0.931959	0.222351	0.000402324	ENSG00000180891	CUEDC1	404093	protein_coding	Nuclear: Adult Only
ENSG00000180921.6_1	0.322956	0.228577	0.486809	0.879958	0.296319	0.0161325	ENSG00000180921	FAM83H	286077	protein_coding	Nuclear: Adult Only
ENSG00000181026.14_1	0.2805	0.243518		0.885751	0.335993	0.0360545	ENSG00000181026	AEN	64782	protein_coding	Nuclear: Adult Only
ENSG00000181035.13_1	0.40391	0.217881	0.332059	0.632983	0.194238	0.00755473	ENSG00000181035	SLC25A42	284439	protein_coding	Nuclear: Adult Only
ENSG00000181090.18_2	0.194599	0.139837	0.49522	0.638524	0.243812	0.0375286	ENSG00000181090	EHMT1	79813	protein_coding	Nuclear: Adult Only
ENSG00000181215.13_2	0.405469	0.243457	0.39729	0.810159	0.270037	0.0149035	ENSG00000181215	C4orf50	389197	protein_coding	Nuclear: Adult Only
ENSG00000181404.15_2	0.280344	0.243062		0.772374	0.288384	0.0328915	ENSG00000181404			protein_coding	Nuclear: Adult Only
ENSG00000181418.7_1	0.207089	0.237781	0.715991	1.22183	0.241552	1.46e-05	ENSG00000181418	DDN	23109	protein_coding	Nuclear: Adult Only
ENSG00000181513.14_1	0.530801	0.243552		0.762955	0.212046	0.00279352	ENSG00000181513	ACBD4	79777	protein_coding	Nuclear: Adult Only
ENSG00000181588.16_2	0.367825	0.186093	0.294814	1.16951	0.271179	0.000263288	ENSG00000181588	MEX3D	399664	protein_coding	Nuclear: Adult Only
ENSG00000181638.17_2	0.219223	0.182419	0.577027	0.998502	0.283908	0.00357353	ENSG00000181638	ZFP41	286128	protein_coding	Nuclear: Adult Only
ENSG00000181690.7_1	0.498937	0.247613		1.2609	0.33437	0.00163478	ENSG00000181690	PLAG1	5324	protein_coding	Nuclear: Adult Only
ENSG00000181751.9_1	-0.0535844	0.159291	0.90917	0.496861	0.166622	0.0156262	ENSG00000181751	C5orf30	90355	protein_coding	Nuclear: Adult Only
ENSG00000181790.10_2	0.382737	0.204255	0.327834	0.696432	0.23527	0.0165304	ENSG00000181790	BAI1	575	protein_coding	Nuclear: Adult Only
ENSG00000182109.7_2	0.486195	0.244528		0.950334	0.266854	0.00312836	ENSG00000182109		728448	antisense	Nuclear: Adult Only
ENSG00000182173.12_1	0.280016	0.211466	0.523835	1.64827	0.286165	5.37e-07	ENSG00000182173	TSEN54	283989	protein_coding	Nuclear: Adult Only
ENSG00000182179.11_2	0.36975	0.250195		1.28721	0.351155	0.00226289	ENSG00000182179	UBA7	100847079	protein_coding	Nuclear: Adult Only
ENSG00000182196.13_2	0.251583	0.242184		1.40354	0.448656	0.0106918	ENSG00000182196	ARL6IP4	51329	protein_coding	Nuclear: Adult Only
ENSG00000182230.11_1	0.406059	0.231692		1.62012	0.315825	1.05e-05	ENSG00000182230	FAM153B	100507387	protein_coding	Nuclear: Adult Only
ENSG00000182310.13_2	0.315916	0.248057		0.976734	0.260325	0.00173537	ENSG00000182310	SPACA6P	147650	protein_coding	Nuclear: Adult Only
ENSG00000182378.13_2	0.075739	0.211641	0.902934	1.10144	0.284097	0.00115609	ENSG00000182378	PLCXD1	55344	protein_coding	Nuclear: Adult Only
ENSG00000182446.13_2	0.132805	0.163529	0.737033	0.461323	0.183172	0.0470733	ENSG00000182446	NPLOC4	55666	protein_coding	Nuclear: Adult Only
ENSG00000182841.12_1	0.260239	0.191526	0.508605	1.72623	0.277134	4.72e-08	ENSG00000182841	RRP7B	91695	transcribed_unprocessed_pseudogene	Nuclear: Adult Only
ENSG00000182871.14_2	0.343169	0.220839	0.434158	1.27603	0.221244	5.24e-07	ENSG00000182871	COL18A1	80781	protein_coding	Nuclear: Adult Only
ENSG00000182873.5_1	0.348243	0.21608	0.417848	1.47762	0.407653	0.00257608	ENSG00000182873			antisense	Nuclear: Adult Only
ENSG00000182963.9_2	-0.0852373	0.172232	0.852039	0.901377	0.286067	0.0101088	ENSG00000182963	GJC1	10052	protein_coding	Nuclear: Adult Only
ENSG00000183018.8_2	0.362173	0.234151	0.435515	1.03757	0.181708	6.82e-07	ENSG00000183018	SPNS2	124976	protein_coding	Nuclear: Adult Only
ENSG00000183060.15_2	0.479795	0.226836	0.256263	0.936711	0.32074	0.0182161	ENSG00000183060	LYSMD4	145748	protein_coding	Nuclear: Adult Only
ENSG00000183091.19_2	0.242376	0.246193		1.18375	0.384207	0.012138	ENSG00000183091	NEB	4703	protein_coding	Nuclear: Adult Only	Schizophrenia (from rare SNVs)
ENSG00000183092.16_2	0.36589	0.219743	0.39729	0.920613	0.204207	0.00012605	ENSG00000183092	BEGAIN	57596	protein_coding	Nuclear: Adult Only
ENSG00000183171.5_1	-0.0351562	0.183782		1.34691	0.47048	0.0211483	ENSG00000183171			processed_pseudogene	Nuclear: Adult Only
ENSG00000183250.11_1	0.309081	0.250195		0.80035	0.313876	0.043926	ENSG00000183250	C21orf67		lincRNA	Nuclear: Adult Only
ENSG00000183317.16_2	0.515245	0.22015	0.19983	0.757183	0.197352	0.00131964	ENSG00000183317	EPHA10	284656	protein_coding	Nuclear: Adult Only
ENSG00000183397.5_1	0.290843	0.244162		1.36347	0.449868	0.0138345	ENSG00000183397	C19orf71	100128569	protein_coding	Nuclear: Adult Only
ENSG00000183401.11_2	0.300988	0.241531		0.763775	0.278221	0.0280029	ENSG00000183401	CCDC159	126075	protein_coding	Nuclear: Adult Only
ENSG00000183426.16_2	0.422953	0.238373	0.361018	1.3458	0.359616	0.0017919	ENSG00000183426	NPIPA1	101059953	protein_coding	Nuclear: Adult Only
ENSG00000183458.13_1	0.734067	0.233954	0.0549988	1.14278	0.45162	0.0458921	ENSG00000183458		101060429	transcribed_unprocessed_pseudogene	Nuclear: Adult Only
ENSG00000183495.13_1	0.264605	0.150093	0.365522	0.932895	0.231752	0.000700506	ENSG00000183495	EP400	57634	protein_coding	Nuclear: Adult Only	Autism Spectrum Disorder (from SAFARI)
ENSG00000183655.12_1	0.144592	0.183527	0.747399	0.735347	0.229636	0.00883038	ENSG00000183655	KLHL25	64410	protein_coding	Nuclear: Adult Only	Schizophrenia (from rare SNVs)
ENSG00000183696.13_1	0.519967	0.249728	0.262321	1.24384	0.236266	5.78e-06	ENSG00000183696	UPP1	7378	protein_coding	Nuclear: Adult Only
ENSG00000183762.12_1	0.128375	0.199526	0.801612	0.872132	0.236177	0.00208218	ENSG00000183762	KREMEN1	83999	protein_coding	Nuclear: Adult Only
ENSG00000183793.13_2	0.676029	0.216283	0.0559502	1.32468	0.447784	0.0166147	ENSG00000183793	NPIPA5	101930008	protein_coding	Nuclear: Adult Only
ENSG00000183826.16_2	0.259712	0.180996	0.478871	0.668748	0.234373	0.0216314	ENSG00000183826	BTBD9	114781	protein_coding	Nuclear: Adult Only
ENSG00000183837.9_1	0.352016	0.192731	0.342238	0.998713	0.229454	0.000227141	ENSG00000183837	PNMA3	29944	protein_coding	Nuclear: Adult Only
ENSG00000183914.14_2	0.563797	0.249735		1.41067	0.334994	0.00037635	ENSG00000183914	DH2	146754	protein_coding	Nuclear: Adult Only
ENSG00000183921.7_1	0.0909205	0.10334		1.48642	0.49479	0.0147634	ENSG00000183921	SDR42E2		protein_coding	Nuclear: Adult Only
ENSG00000183963.18_2	0.435177	0.186043	0.19983	0.978221	0.300766	0.0076752	ENSG00000183963	SMTN	6525	protein_coding	Nuclear: Adult Only
ENSG00000184160.7_2	0.378818	0.244801		0.808	0.26482	0.0131275	ENSG00000184160	ADRA2C	152	protein_coding	Nuclear: Adult Only
ENSG00000184216.12_2	0.335815	0.159803	0.258831	0.798711	0.189218	0.000362546	ENSG00000184216	IRAK1	3654	protein_coding	Nuclear: Adult Only
ENSG00000184261.4_1	-0.0342931	0.250184	0.970362	0.674657	0.239817	0.0238259	ENSG00000184261	KCNK12	56660	protein_coding	Nuclear: Adult Only
ENSG00000184271.16_2	0.179289	0.147733	0.571452	0.775829	0.215247	0.00274359	ENSG00000184271	POU6F1	5463	protein_coding	Nuclear: Adult Only
ENSG00000184343.10_2	0.34134	0.222072		1.63438	0.327673	1.94e-05	ENSG00000184343	SRPK3	26576	protein_coding	Nuclear: Adult Only
ENSG00000184441.4_1	0.705187	0.250161		1.46856	0.401816	0.00234657	ENSG00000184441			antisense	Nuclear: Adult Only
ENSG00000184489.11_2	0.506654	0.181737	0.105313	0.897811	0.25979	0.00426149	ENSG00000184489	PTP4A3	11156	protein_coding	Nuclear: Adult Only
ENSG00000184545.10_1	0.405442	0.184501	0.234111	0.950112	0.231457	0.00053554	ENSG00000184545	DUSP8	101927562	protein_coding	Nuclear: Adult Only
ENSG00000184602.5_1	-0.099056	0.139682	0.777207	0.494303	0.186954	0.0354713	ENSG00000184602	SNN	8303	protein_coding	Nuclear: Adult Only
ENSG00000184863.10_2	0.307992	0.1769	0.371463	1.12111	0.291187	0.00125954	ENSG00000184863	RBM33	155435	protein_coding	Nuclear: Adult Only
ENSG00000184922.13_2	0.164564	0.2052	0.741186	0.529477	0.169711	0.01093	ENSG00000184922	FMNL1	752	protein_coding	Nuclear: Adult Only
ENSG00000184925.11_1	0.270727	0.199861		1.63904	0.383954	0.00030632	ENSG00000184925	LCN12	286256	protein_coding	Nuclear: Adult Only
ENSG00000184956.15_2	0.0320992	0.0757929		1.78649	0.489443	0.00238471	ENSG00000184956	MUC6	4588	protein_coding	Nuclear: Adult Only
ENSG00000185024.16_2	0.471611	0.149376	0.0532733	0.643967	0.195855	0.00696823	ENSG00000185024	BRF1	2972	protein_coding	Nuclear: Adult Only
ENSG00000185033.14_2	0.0466969	0.157015	0.920772	0.819271	0.305105	0.0322883	ENSG00000185033	SEMA4B	10509	protein_coding	Nuclear: Adult Only
ENSG00000185128.11	0.676059	0.242923		1.75237	0.432505	0.000644398	ENSG00000185128	TBC1D3F	101060421	protein_coding	Nuclear: Adult Only
ENSG00000185163.9_1	0.0937394	0.208022	0.870024	0.613966	0.224171	0.0284091	ENSG00000185163	DDX51	317781	protein_coding	Nuclear: Adult Only
ENSG00000185215.8_2	0.370005	0.22908	0.416422	0.902312	0.250585	0.00277344	ENSG00000185215	TNFAIP2	7127	protein_coding	Nuclear: Adult Only
ENSG00000185246.17_2	0.187836	0.152501	0.564968	1.15682	0.255789	0.000119198	ENSG00000185246	PRPF39	55015	protein_coding	Nuclear: Adult Only	Autism Spectrum Disorder (from SAFARI)
ENSG00000185252.18_2	0.132443	0.159885	0.729888	0.554136	0.220132	0.0471681	ENSG00000185252	ZNF74	7625	protein_coding	Nuclear: Adult Only
ENSG00000185433.8_1	0.0384009	0.135038		1.44975	0.493212	0.0174064	ENSG00000185433	LINC00158	54072	lincRNA	Nuclear: Adult Only
ENSG00000185482.7_2	0.313769	0.245699		1.04495	0.39759	0.0367337	ENSG00000185482	STAC3	246329	protein_coding	Nuclear: Adult Only
ENSG00000185499.16_2	0.398522	0.226968		1.31266	0.471485	0.0255731	ENSG00000185499	MUC1	4582	protein_coding	Nuclear: Adult Only
ENSG00000185504.16_2	0.409679	0.156997	0.140882	1.10804	0.223181	2.14e-05	ENSG00000185504	C17orf70	80233	protein_coding	Nuclear: Adult Only
ENSG00000185513.14_2	0.620713	0.239773	0.145589	1.51996	0.317532	4.4e-05	ENSG00000185513	L3MBTL1	26013	protein_coding	Nuclear: Adult Only
ENSG00000185615.15_1	0.510773	0.234775	0.23851	2.43344	0.300414	5.02e-13	ENSG00000185615	PDIA2	64714	protein_coding	Nuclear: Adult Only
ENSG00000185669.5_1	0.0524065	0.238136		0.957603	0.343589	0.0253926	ENSG00000185669	SI3	333929	protein_coding	Nuclear: Adult Only
ENSG00000185963.13_1	0.308345	0.158499	0.305762	0.582314	0.204915	0.0222686	ENSG00000185963	BICD2	23299	protein_coding	Nuclear: Adult Only
ENSG00000185988.11_2	0.41323	0.249432		1.48071	0.364164	0.000613127	ENSG00000185988	PLK5	126520	protein_coding	Nuclear: Adult Only
ENSG00000186001.12_2	0.143565	0.148251	0.673676	0.729942	0.25141	0.0190385	ENSG00000186001	LRCH3	84859	protein_coding	Nuclear: Adult Only
ENSG00000186010.18_2	0.549156	0.249521		1.51434	0.411979	0.002195	ENSG00000186010	NDUFA13	51079	protein_coding	Nuclear: Adult Only	Bipolar Affective Disorder (from GWAS)
ENSG00000186111.9_2	0.265687	0.155669	0.380559	0.899331	0.285638	0.0101524	ENSG00000186111	PIP5K1C	23396	protein_coding	Nuclear: Adult Only
ENSG00000186166.8_1	0.124203	0.211475	0.820297	0.818407	0.243753	0.00567674	ENSG00000186166	CCDC84	338657	protein_coding	Nuclear: Adult Only	Schizophrenia (from rare SNVs)
ENSG00000186193.8_1	0.318534	0.24496		0.83963	0.332715	0.0465472	ENSG00000186193	SAPCD2	101928672	protein_coding	Nuclear: Adult Only
ENSG00000186275.7	0.183011	0.217449	0.725237	1.01476	0.266798	0.00147349	ENSG00000186275	NBPF12		protein_coding	Nuclear: Adult Only
ENSG00000186575.17_2	0.268977	0.146338	0.338305	0.956941	0.244585	0.00102669	ENSG00000186575	NF2	4771	protein_coding	Nuclear: Adult Only
ENSG00000186635.14_2	0.592986	0.191712	0.0592136	0.751306	0.247778	0.0137894	ENSG00000186635	ARAP1	116985	protein_coding	Nuclear: Adult Only
ENSG00000186642.15_2	0.377378	0.173155	0.237318	0.714418	0.21022	0.00505157	ENSG00000186642	PDE2A	5138	protein_coding	Nuclear: Adult Only
ENSG00000186648.14_2	0.381152	0.206238	0.333732	1.6868	0.257529	8.78e-09	ENSG00000186648	LRRC16B	90668	protein_coding	Nuclear: Adult Only
ENSG00000186715.10_1	0.740594	0.249843		1.43056	0.493614	0.0192637	ENSG00000186715	MST1L		transcribed_unprocessed_pseudogene	Nuclear: Adult Only
ENSG00000186716.19_2	0.332239	0.150146	0.231402	0.592053	0.220848	0.0326748	ENSG00000186716	BCR	613	protein_coding	Nuclear: Adult Only
ENSG00000186732.13_2	0.101582	0.160704	0.804421	0.481443	0.181211	0.0344759	ENSG00000186732	MPPED1	758	protein_coding	Nuclear: Adult Only
ENSG00000186815.12_2	0.482211	0.242023	0.289091	0.743337	0.273315	0.0298095	ENSG00000186815	TPCN1	53373	protein_coding	Nuclear: Adult Only
ENSG00000186831.11_1				1.36104	0.370009	0.002179	ENSG00000186831	KRT17P2		transcribed_unprocessed_pseudogene	Nuclear: Adult Only
ENSG00000186862.17_2	0.0524553	0.189755	0.926719	0.753513	0.20562	0.00226896	ENSG00000186862	PDZD7	79955	protein_coding	Nuclear: Adult Only
ENSG00000186866.16_1	0.338364	0.202854	0.396052	1.19357	0.279605	0.00030632	ENSG00000186866	POFUT2	23275	protein_coding	Nuclear: Adult Only
ENSG00000186918.13_2	0.249089	0.165667	0.452566	0.533519	0.213575	0.0493887	ENSG00000186918	ZNF395	55893	protein_coding	Nuclear: Adult Only
ENSG00000187066.8_1	0.137257	0.243121		1.25736	0.485551	0.0401586	ENSG00000187066	TMEM262	100130348	protein_coding	Nuclear: Adult Only
ENSG00000187240.13_1	0.0830372	0.160322	0.845089	0.815184	0.263451	0.0117113	ENSG00000187240	DYNC2H1	79659	protein_coding	Nuclear: Adult Only
ENSG00000187498.14_2	0.156708	0.224407	0.780426	0.893337	0.278122	0.00859545	ENSG00000187498	COL4A1	1282	protein_coding	Nuclear: Adult Only
ENSG00000187531.13_2	0.460061	0.191556	0.185609	0.906278	0.265609	0.00487305	ENSG00000187531	SIRT7	51547	protein_coding	Nuclear: Adult Only
ENSG00000187535.13_2	0.381848	0.15987	0.188489	0.648238	0.238345	0.0298095	ENSG00000187535	IFT140	9742	protein_coding	Nuclear: Adult Only	Schizophrenia (from rare SNVs)
ENSG00000187605.15_1	0.315928	0.165105	0.314716	0.907585	0.243305	0.00185872	ENSG00000187605	TET3	200424	protein_coding	Nuclear: Adult Only
ENSG00000187772.7_2	-0.00738672	0.207386		1.1363	0.453441	0.0484851	ENSG00000187772	LIN28B	389421	protein_coding	Nuclear: Adult Only
ENSG00000187792.4_1	0.280769	0.177351	0.425591	1.00235	0.321195	0.0109106	ENSG00000187792	ZNF70	7621	protein_coding	Nuclear: Adult Only
ENSG00000187796.13_2	0.359639	0.225809		1.95082	0.371702	6.2e-06	ENSG00000187796	CARD9	728489	protein_coding	Nuclear: Adult Only
ENSG00000187800.13_1	0.319082	0.244957		1.08505	0.343985	0.0100188	ENSG00000187800	PEAR1	375033	protein_coding	Nuclear: Adult Only
ENSG00000187984.12_1	-0.000350603	0.249319		1.96405	0.339136	4.75e-07	ENSG00000187984	ANKRD19P	138649	transcribed_unprocessed_pseudogene	Nuclear: Adult Only
ENSG00000188070.9_2	0.310435	0.159077	0.30417	0.770292	0.197273	0.00105195	ENSG00000188070	C11orf95		protein_coding	Nuclear: Adult Only
ENSG00000188185.11_1	0.0975489	0.22187	0.87403	1.00103	0.390807	0.042758	ENSG00000188185	LINC00265	101929038	lincRNA	Nuclear: Adult Only
ENSG00000188234.13_2	0.146303	0.245822	0.81758	0.968727	0.311472	0.0112074	ENSG00000188234	AGAP4	101060581	protein_coding	Nuclear: Adult Only
ENSG00000188242.4_1	0.140372	0.219348	0.802774	0.781596	0.258722	0.0141727	ENSG00000188242			antisense	Nuclear: Adult Only
ENSG00000188263.10_1	-0.0430898	0.0972753		1.46276	0.51154	0.0212764	ENSG00000188263	IL17REL	400935	protein_coding	Nuclear: Adult Only
ENSG00000188322.4_1	0.280659	0.150761	0.330417	0.948735	0.235532	0.000694885	ENSG00000188322	SBK1	388228	protein_coding	Nuclear: Adult Only
ENSG00000188385.11_1	0.168703	0.219646	0.756106	1.11299	0.277643	0.000737875	ENSG00000188385	JAKMIP3	282973	protein_coding	Nuclear: Adult Only
ENSG00000188599.17_1	0.456574	0.245929	0.331635	1.54585	0.323188	4.45e-05	ENSG00000188599	NPIPP1		transcribed_unprocessed_pseudogene	Nuclear: Adult Only
ENSG00000188735.12_1	0.430683	0.207216	0.263413	0.884502	0.205159	0.000264247	ENSG00000188735	TMEM120B	144404	protein_coding	Nuclear: Adult Only
ENSG00000188766.12_1	0.118389	0.217755	0.834866	0.735592	0.266744	0.0272099	ENSG00000188766	SPRED3	399473	protein_coding	Nuclear: Adult Only
ENSG00000188827.10_1	0.178183	0.175493	0.651072	1.07366	0.377001	0.0219259	ENSG00000188827	SLX4	84464	protein_coding	Nuclear: Adult Only
ENSG00000188878.18_2	0.276285	0.24587		1.13599	0.284748	0.000789517	ENSG00000188878	FBF1	85302	protein_coding	Nuclear: Adult Only
ENSG00000188895.11_2	0.183701	0.166733	0.616638	0.496028	0.169523	0.0179863	ENSG00000188895	MSL1	339287	protein_coding	Nuclear: Adult Only
ENSG00000188906.14_2	0.270911	0.232652	0.592341	0.587622	0.22684	0.0400886	ENSG00000188906	LRRK2	120892	protein_coding	Nuclear: Adult Only	Neurodegenerative Disorder
ENSG00000188986.5_1	0.169269	0.135103	0.555762	0.650505	0.22724	0.0211546	ENSG00000188986	NELFB	25920	protein_coding	Nuclear: Adult Only
ENSG00000188994.12_1	0.0537944	0.135993	0.891627	0.84357	0.210998	0.000765537	ENSG00000188994	ZNF292	23036	protein_coding	Nuclear: Adult Only	Autism Spectrum Disorder (from SAFARI)
ENSG00000189050.15_2	0.344722	0.22707	0.447493	0.986099	0.34807	0.022729	ENSG00000189050	RNFT1	51136	protein_coding	Nuclear: Adult Only
ENSG00000189212.12_2	0.629128	0.250106		1.37618	0.278191	2.3e-05	ENSG00000189212	DPY19L2P1		transcribed_unprocessed_pseudogene	Nuclear: Adult Only
ENSG00000189275.3_1				1.86682	0.325563	6.08e-07	ENSG00000189275			lincRNA	Nuclear: Adult Only
ENSG00000189319.13_2	0.553179	0.227803	0.179508	1.21964	0.211587	5.3e-07	ENSG00000189319	FAM53B	9679	protein_coding	Nuclear: Adult Only
ENSG00000189350.12_2	0.0938494	0.131802		1.18132	0.401145	0.0171963	ENSG00000189350	FAM179A	165186	protein_coding	Nuclear: Adult Only
ENSG00000189410.11_2	0.377978	0.231144		0.607519	0.168614	0.00275403	ENSG00000189410	SH2D5	400745	protein_coding	Nuclear: Adult Only
ENSG00000196074.12_2	0.674563	0.25019		1.25523	0.322568	0.00110261	ENSG00000196074	SYCP2	10388	protein_coding	Nuclear: Adult Only
ENSG00000196123.12_1	0.38136	0.190965	0.287175	1.17565	0.288307	0.000590296	ENSG00000196123	KIAA0895L	653319	protein_coding	Nuclear: Adult Only
ENSG00000196132.11_1	0.244507	0.233401	0.639832	0.85448	0.276032	0.0116665	ENSG00000196132	MYT1	4661	protein_coding	Nuclear: Adult Only
ENSG00000196155.12_2	0.414925	0.238561		1.2759	0.399375	0.00897635	ENSG00000196155	PLEKHG4	25894	protein_coding	Nuclear: Adult Only
ENSG00000196182.10_1	0.371283	0.141452	0.138578	1.0213	0.189781	3.42e-06	ENSG00000196182	STK40	83931	protein_coding	Nuclear: Adult Only
ENSG00000196218.12_2	0.482967	0.244207		0.762363	0.25638	0.0159694	ENSG00000196218	RYR1	6261	protein_coding	Nuclear: Adult Only
ENSG00000196268.11_2	0.144971	0.165202	0.714546	0.871645	0.294968	0.0167366	ENSG00000196268	ZNF493	284443	protein_coding	Nuclear: Adult Only
ENSG00000196295.11_2	0.384996	0.159032	0.179508	0.893327	0.316127	0.0231216	ENSG00000196295		101928623	processed_transcript	Nuclear: Adult Only
ENSG00000196296.13_2	0.191786	0.218188		1.60655	0.4621	0.00402927	ENSG00000196296	ATP2A1	487	protein_coding	Nuclear: Adult Only
ENSG00000196358.10_1	0.192689	0.247385	0.751154	0.848821	0.291379	0.0185712	ENSG00000196358	NTNG2	84628	protein_coding	Nuclear: Adult Only
ENSG00000196366.3_1	0.255199	0.147469		1.56811	0.481091	0.00754792	ENSG00000196366	C9orf163	158055	lincRNA	Nuclear: Adult Only
ENSG00000196367.12_2	0.28637	0.128373	0.227176	0.958962	0.230352	0.000440373	ENSG00000196367	TRRAP	8295	protein_coding	Nuclear: Adult Only
ENSG00000196405.12_1	0.0623489	0.150725	0.88435	0.762133	0.180915	0.000374273	ENSG00000196405	EVL	51466	protein_coding	Nuclear: Adult Only
ENSG00000196421.8_2	0.711766	0.249306	0.0943226	1.70997	0.442424	0.0012014	ENSG00000196421	LINC00176	284739	protein_coding	Nuclear: Adult Only
ENSG00000196422.10_1	0.282844	0.189074	0.454558	0.767619	0.26618	0.0199916	ENSG00000196422	PPP1R26	9858	protein_coding	Nuclear: Adult Only
ENSG00000196440.11_1	0.192394	0.159896	0.576923	0.578386	0.216663	0.0335045	ENSG00000196440	ARMCX4	100131755	protein_coding	Nuclear: Adult Only
ENSG00000196498.13_2	0.553637	0.178379	0.0579829	0.776148	0.270089	0.0205546	ENSG00000196498	NCOR2	9612	protein_coding	Nuclear: Adult Only	Schizophrenia (from rare SNVs)
ENSG00000196668.3_1	0.110137	0.201489		1.41665	0.481457	0.0172883	ENSG00000196668	LINC00173	100287569	processed_transcript	Nuclear: Adult Only
ENSG00000196678.13_2	0.00634639	0.204006	0.992913	1.03636	0.320235	0.00803572	ENSG00000196678	ERI2	112479	protein_coding	Nuclear: Adult Only
ENSG00000196689.11_2	0.0863164	0.185542	0.863195	0.85282	0.276023	0.0118475	ENSG00000196689	TRPV1	7442	protein_coding	Nuclear: Adult Only
ENSG00000196696.12_2	0.269309	0.244045	0.616302	1.14356	0.356631	0.00872943	ENSG00000196696	PDXDC2P	283970	processed_transcript	Nuclear: Adult Only
ENSG00000196739.14_1	0.296523	0.237149	0.556857	1.48988	0.319128	6.84e-05	ENSG00000196739	COL27A1	85301	protein_coding	Nuclear: Adult Only
ENSG00000196814.14_1	0.327333	0.159546	0.271023	0.840048	0.241752	0.00404502	ENSG00000196814	MVB12B	89853	protein_coding	Nuclear: Adult Only
ENSG00000196821.9_1	0.106106	0.167854	0.804421	0.677124	0.25597	0.0353642	ENSG00000196821	C6orf106	64771	protein_coding	Nuclear: Adult Only
ENSG00000196972.8_2	0.0806471	0.234721	0.907549	0.66434	0.195293	0.00500292	ENSG00000196972	LINC00087	644596	protein_coding	Nuclear: Adult Only
ENSG00000197063.10_2	0.489702	0.186166	0.137028	0.696213	0.199938	0.00396772	ENSG00000197063	MAFG	4097	protein_coding	Nuclear: Adult Only
ENSG00000197136.4_2	0.451433	0.167229	0.121534	0.742111	0.177618	0.00041988	ENSG00000197136	PCNXL3	399909	protein_coding	Nuclear: Adult Only
ENSG00000197162.9_1	-0.043636	0.161042	0.928555	0.830267	0.22936	0.00261505	ENSG00000197162	ZNF785	146540	protein_coding	Nuclear: Adult Only
ENSG00000197182.13_2	0.501872	0.229894		1.35473	0.415039	0.00746711	ENSG00000197182			lincRNA	Nuclear: Adult Only
ENSG00000197191.4_1	0.508887	0.237087		1.65405	0.412663	0.000738882	ENSG00000197191	C9orf169	375791	protein_coding	Nuclear: Adult Only
ENSG00000197256.10_2	0.115809	0.174657	0.7935	0.722817	0.263253	0.0279758	ENSG00000197256	KANK2	25959	protein_coding	Nuclear: Adult Only
ENSG00000197355.10_1	0.246398	0.201912		1.62702	0.317931	1.1e-05	ENSG00000197355	UAP1L1	91373	protein_coding	Nuclear: Adult Only
ENSG00000197363.9_1	0.395589	0.181166	0.236448	0.951042	0.229922	0.000480567	ENSG00000197363	ZNF517	340385	protein_coding	Nuclear: Adult Only	Autism Spectrum Disorder (from SAFARI)
ENSG00000197380.10_1	0.165718	0.178273	0.691906	0.790639	0.186926	0.000350709	ENSG00000197380	DACT3	147906	protein_coding	Nuclear: Adult Only
ENSG00000197386.10_1	0.365481	0.157268	0.203379	0.618369	0.2041	0.0138623	ENSG00000197386	HTT	3064	protein_coding	Nuclear: Adult Only	Neurodegenerative Disorder
ENSG00000197558.11_2	0.758018	0.241418		1.45009	0.351945	0.000508915	ENSG00000197558	SSPO		protein_coding	Nuclear: Adult Only	Autism Spectrum Disorder (from SAFARI)
ENSG00000197562.9_2	0.35043	0.160381	0.236343	0.681994	0.202838	0.0055981	ENSG00000197562	RAB40C	57799	protein_coding	Nuclear: Adult Only
ENSG00000197599.12_1	0.740046	0.250123		2.59382	0.383455	2.72e-09	ENSG00000197599	CCDC154	645811	protein_coding	Nuclear: Adult Only
ENSG00000197603.13_2	-0.193736	0.154567	0.555598	0.824799	0.239829	0.00448721	ENSG00000197603	C5orf42	65250	protein_coding	Nuclear: Adult Only
ENSG00000197622.12_1	0.190511	0.148271	0.54136	0.565982	0.216228	0.0376298	ENSG00000197622	CDC42SE1	56882	protein_coding	Nuclear: Adult Only
ENSG00000197776.7_1	0.256249	0.248345		0.724115	0.27135	0.0335654	ENSG00000197776	KLHDC1	122773	protein_coding	Nuclear: Adult Only
ENSG00000197816.13_2	0.420177	0.250195		1.32893	0.381547	0.00395784	ENSG00000197816	CCDC180	100499483	protein_coding	Nuclear: Adult Only
ENSG00000197879.14_2	0.269718	0.200573	0.514379	0.672158	0.244773	0.027957	ENSG00000197879	MYO1C	4641	protein_coding	Nuclear: Adult Only
ENSG00000197948.10_1	0.6321	0.239638		1.53205	0.279727	2.16e-06	ENSG00000197948	FCHSD1	89848	protein_coding	Nuclear: Adult Only
ENSG00000197976.11_1	0.328415	0.14893	0.232825	0.98423	0.263145	0.00180182	ENSG00000197976	AKAP17A	8227	protein_coding	Nuclear: Adult Only
ENSG00000198010.12_2	0.205016	0.234998	0.715908	0.632935	0.231202	0.0285	ENSG00000198010	DLGAP2	9228	protein_coding	Nuclear: Adult Only
ENSG00000198026.7_1	0.141474	0.162385	0.71592	0.737396	0.235217	0.0105015	ENSG00000198026	ZNF335	63925	protein_coding	Nuclear: Adult Only
ENSG00000198039.11_1	0.0925674	0.198819	0.863028	0.875105	0.211439	0.000476763	ENSG00000198039	ZNF273	101929245	protein_coding	Nuclear: Adult Only
ENSG00000198089.14_2	0.316572	0.177375	0.357177	1.17539	0.243008	3.61e-05	ENSG00000198089	SFI1	9814	protein_coding	Nuclear: Adult Only
ENSG00000198133.8_2	0.270613	0.19332	0.492171	0.679106	0.230646	0.017215	ENSG00000198133	TMEM229B	161145	protein_coding	Nuclear: Adult Only	Neurodegenerative Disorder
ENSG00000198169.8_1	0.321063	0.161903	0.292062	0.901164	0.250296	0.00277647	ENSG00000198169	ZNF251	90987	protein_coding	Nuclear: Adult Only
ENSG00000198198.14_2	0.49487	0.169235	0.0836051	0.967196	0.344725	0.0242794	ENSG00000198198	SZT2	23334	protein_coding	Nuclear: Adult Only
ENSG00000198208.11_2	0.438424	0.210142	0.261761	1.16679	0.22244	6.27e-06	ENSG00000198208	RPS6KL1	83694	protein_coding	Nuclear: Adult Only
ENSG00000198265.11_2	0.140308	0.139239	0.654744	0.557472	0.200641	0.0258791	ENSG00000198265	HELZ	9931	protein_coding	Nuclear: Adult Only
ENSG00000198276.14_2	0.123193	0.157578	0.750049	0.669954	0.259026	0.0404132	ENSG00000198276	UCKL1	54963	protein_coding	Nuclear: Adult Only
ENSG00000198517.9_2	0.451073	0.230624	0.302359	1.21548	0.237471	1.1e-05	ENSG00000198517	MAFK	7975	protein_coding	Nuclear: Adult Only
ENSG00000198520.10_2	0.255047	0.248547	0.646759	1.42793	0.336461	0.000333561	ENSG00000198520	C1orf228	339541	protein_coding	Nuclear: Adult Only
ENSG00000198547.8_1	0.669439	0.241451		1.21074	0.329627	0.00221384	ENSG00000198547	C20orf203		lincRNA	Nuclear: Adult Only
ENSG00000198563.13_2	0.00871718	0.161617	0.988228	0.982134	0.332158	0.0166743	ENSG00000198563	DDX39B	692199	protein_coding	Nuclear: Adult Only
ENSG00000198569.9_1	0.159191	0.159779		1.50858	0.489345	0.0120754	ENSG00000198569	SLC34A3	142680	protein_coding	Nuclear: Adult Only
ENSG00000198576.3_1	0.583577	0.239103	0.177559	1.03125	0.26431	0.00106271	ENSG00000198576	ARC	23237	protein_coding	Nuclear: Adult Only
ENSG00000198598.6_1	0.503895	0.221556	0.215229	0.573031	0.191683	0.0153112	ENSG00000198598	MMP17	4326	protein_coding	Nuclear: Adult Only
ENSG00000198625.12_1	0.282143	0.153863	0.339503	0.646313	0.222803	0.0191578	ENSG00000198625	MDM4	4194	protein_coding	Nuclear: Adult Only
ENSG00000198646.13_2	-0.215877	0.113045	0.315983	0.55321	0.196471	0.0236907	ENSG00000198646	NCOA6	23054	protein_coding	Nuclear: Adult Only
ENSG00000198682.12_1	0.146311	0.239436		1.25296	0.248051	1.5e-05	ENSG00000198682	PAPSS2	9060	protein_coding	Nuclear: Adult Only
ENSG00000198695.2	0.0126389	0.223675	0.98806	0.693125	0.27011	0.0423329	ENSG00000198695	MT-ND6	4541	protein_coding	Nuclear: Adult Only
ENSG00000198719.8_1	0.520846	0.181902	0.0934083	1.23406	0.282524	0.000215258	ENSG00000198719	DLL1	28514	protein_coding	Nuclear: Adult Only
ENSG00000198720.12_2	0.415776	0.186697	0.228375	1.37536	0.277041	2.14e-05	ENSG00000198720	ANKRD13B	124930	protein_coding	Nuclear: Adult Only
ENSG00000198722.14_2	0.427662	0.187214	0.212825	0.75349	0.256389	0.0174271	ENSG00000198722	UNC13B	10497	protein_coding	Nuclear: Adult Only
ENSG00000198786.2	-0.0515924	0.244941	0.949439	1.07606	0.268788	0.00075079	ENSG00000198786	MT-ND5	4540	protein_coding	Nuclear: Adult Only
ENSG00000198792.12_2	0.137064	0.162504	0.725237	0.462392	0.176577	0.0375508	ENSG00000198792	TMEM184B	25829	protein_coding	Nuclear: Adult Only
ENSG00000198804.2	-0.174989	0.156979	0.610367	0.636006	0.248667	0.0431687	ENSG00000198804	MT-CO1	4512	protein_coding	Nuclear: Adult Only
ENSG00000198837.9_2	0.512007	0.170954	0.0732771	1.20136	0.167157	2.2e-10	ENSG00000198837	DENND4B	9909	protein_coding	Nuclear: Adult Only
ENSG00000198909.7_2	0.366644	0.17435	0.258398	1.13565	0.27405	0.000469306	ENSG00000198909	MAP3K3	4215	protein_coding	Nuclear: Adult Only
ENSG00000198915.11_2	0.297121	0.219437	0.510326	0.525469	0.179089	0.0176391	ENSG00000198915	RASGEF1A	221002	protein_coding	Nuclear: Adult Only
ENSG00000198917.12_2	0.437968	0.189758	0.208024	0.706931	0.202787	0.00392224	ENSG00000198917	C9orf114	51490	protein_coding	Nuclear: Adult Only
ENSG00000198944.5_2	0.222607	0.249126		1.16752	0.241407	3.61e-05	ENSG00000198944	SOWAHA	134548	protein_coding	Nuclear: Adult Only
ENSG00000198952.8_1	0.395871	0.15666	0.157098	0.786809	0.210932	0.00185872	ENSG00000198952	SMG5	23381	protein_coding	Nuclear: Adult Only
ENSG00000203485.12_1	0.405078	0.21541	0.324656	0.53967	0.174691	0.011859	ENSG00000203485	INF2	64423	protein_coding	Nuclear: Adult Only
ENSG00000203499.11_2	0.107299	0.204596		1.00056	0.39506	0.0457155	ENSG00000203499	FAM83H-AS1	100128338	protein_coding	Nuclear: Adult Only
ENSG00000203684.5_1	0.201436	0.180333		0.991225	0.371206	0.0334502	ENSG00000203684	IBA57-AS1	574432	lincRNA	Nuclear: Adult Only
ENSG00000203685.9_2	0.371178	0.180301	0.269125	1.17364	0.316379	0.00197838	ENSG00000203685	C1orf95	375057	protein_coding	Nuclear: Adult Only
ENSG00000203709.10_2	0.528658	0.232481		1.05895	0.271978	0.00109442	ENSG00000203709	C1orf132	407025	lincRNA	Nuclear: Adult Only
ENSG00000203761.5_1	0.323435	0.234147	0.500154	1.47953	0.358072	0.000487574	ENSG00000203761	MSTO2P		unprocessed_pseudogene	Nuclear: Adult Only
ENSG00000203832.6	0.427236	0.218977	0.30417	1.18767	0.329721	0.00276177	ENSG00000203832	NBPF20	101060226	protein_coding	Nuclear: Adult Only
ENSG00000203880.11_2	0.159186	0.135376	0.587887	0.406814	0.162697	0.049129	ENSG00000203880	PCMTD2	55251	protein_coding	Nuclear: Adult Only
ENSG00000203900.2_1	0.500144	0.241447		1.50653	0.44704	0.0054779	ENSG00000203900		100130587	antisense	Nuclear: Adult Only
ENSG00000204084.12_2	0.082766	0.203899	0.887145	0.601156	0.241094	0.0498883	ENSG00000204084	INPP5B	3633	protein_coding	Nuclear: Adult Only
ENSG00000204128.5_1	0.365752	0.21504	0.383661	0.875274	0.243428	0.00281197	ENSG00000204128	C2orf72	257407	protein_coding	Nuclear: Adult Only
ENSG00000204149.10_2	0.398031	0.210159	0.321248	1.12209	0.279849	0.0007356	ENSG00000204149	AGAP6	101060581	protein_coding	Nuclear: Adult Only
ENSG00000204262.11_1	-4.96e-05	0.241319	0.999836	0.933206	0.181448	9.89e-06	ENSG00000204262	COL5A2	1290	protein_coding	Nuclear: Adult Only
ENSG00000204282.4_2	0.106322	0.131711		1.07451	0.395802	0.0301795	ENSG00000204282	TNRC6C-AS1	100131096	processed_transcript	Nuclear: Adult Only
ENSG00000204316.12_2	0.263222	0.243418	0.625302	1.34103	0.329752	0.000612051	ENSG00000204316	MRPL38	64978	protein_coding	Nuclear: Adult Only
ENSG00000204351.11_1	0.364397	0.186235	0.302181	0.710884	0.271607	0.0376441	ENSG00000204351	SKIV2L	6499	protein_coding	Nuclear: Adult Only
ENSG00000204371.11_1	0.144149	0.121957	0.585543	0.683384	0.189172	0.00267172	ENSG00000204371	EHMT2	10919	protein_coding	Nuclear: Adult Only
ENSG00000204377.3	0.217378	0.249304		0.856711	0.299558	0.0212676	ENSG00000204377	C1orf134		protein_coding	Nuclear: Adult Only
ENSG00000204396.10_1	0.469432	0.230527		1.05479	0.320598	0.00693735	ENSG00000204396	VWA7	80737	protein_coding	Nuclear: Adult Only
ENSG00000204469.12_1	0.25195	0.135997	0.332385	0.70131	0.260406	0.031645	ENSG00000204469	PRRC2A	7916	protein_coding	Nuclear: Adult Only
ENSG00000204677.10_2	0.133664	0.193605		1.55249	0.33467	7.74e-05	ENSG00000204677	FAM153C	101930363	protein_coding	Nuclear: Adult Only
ENSG00000204771.5	-0.00623396	0.189811		2.35317	0.457987	1.01e-05	ENSG00000204771			pseudogene	Nuclear: Adult Only
ENSG00000204839.8_2	0.569319	0.240254		1.64792	0.346689	5.01e-05	ENSG00000204839	MROH6	642475	protein_coding	Nuclear: Adult Only
ENSG00000204946.9_2	0.246541	0.176372	0.492512	1.17613	0.319962	0.002195	ENSG00000204946	ZNF783	100289678	protein_coding	Nuclear: Adult Only
ENSG00000204950.3_2	0.29309	0.250093	0.589932	1.01306	0.256924	0.000927063	ENSG00000204950	LRRC10B	390205	protein_coding	Nuclear: Adult Only
ENSG00000204991.10_2	0.593994	0.188693	0.0541654	1.05279	0.173493	1.12e-07	ENSG00000204991	SPIRE2	84501	protein_coding	Nuclear: Adult Only
ENSG00000205089.7_1	0.52361	0.239222		1.22156	0.407695	0.0150499	ENSG00000205089	CCNI2	645121	protein_coding	Nuclear: Adult Only
ENSG00000205250.8_2	0.432919	0.176404	0.174895	0.810056	0.198913	0.000600509	ENSG00000205250	E2F4	1874	protein_coding	Nuclear: Adult Only
ENSG00000205268.10_1	0.194239	0.145732	0.519529	0.820645	0.228345	0.00282413	ENSG00000205268	PDE7A	5150	protein_coding	Nuclear: Adult Only
ENSG00000205356.9_2	0.335976	0.176	0.316238	0.739877	0.193254	0.00135737	ENSG00000205356	TECPR1	25851	protein_coding	Nuclear: Adult Only
ENSG00000205517.12_2				1.14556	0.380911	0.0146765	ENSG00000205517	RGL3	57139	protein_coding	Nuclear: Adult Only
ENSG00000205560.12_2	0.284035	0.211876		2.39741	0.487437	2.58e-05	ENSG00000205560	CPT1B	1375	protein_coding	Nuclear: Adult Only
ENSG00000205593.11_2	0.442202	0.193949	0.213834	0.770327	0.196043	0.000969576	ENSG00000205593	DENND6B	414918	protein_coding	Nuclear: Adult Only
ENSG00000205702.10_1	0.6012	0.248977		2.46319	0.377881	1.01e-08	ENSG00000205702	CYP2D7P		polymorphic_pseudogene	Nuclear: Adult Only
ENSG00000205903.6_2	0.471449	0.168117	0.101944	1.09966	0.216845	1.38e-05	ENSG00000205903	ZNF316		protein_coding	Nuclear: Adult Only
ENSG00000205959.3_2	0.177707	0.248642	0.77501	1.52234	0.355958	0.000299439	ENSG00000205959			lincRNA	Nuclear: Adult Only
ENSG00000206140.10_2	0.299694	0.249501		1.31896	0.369039	0.00300598	ENSG00000206140	TMEM191C		protein_coding	Nuclear: Adult Only
ENSG00000206149.10_2	0.318859	0.191615	0.397306	0.970837	0.245626	0.000896848	ENSG00000206149	HERC2P9	101930157	transcribed_unprocessed_pseudogene	Nuclear: Adult Only
ENSG00000206344.6_2	0.143615	0.204847		1.47845	0.487015	0.0136703	ENSG00000206344	HCG27	253018	protein_coding	Nuclear: Adult Only
ENSG00000206417.8_1	0.75007	0.244364	0.0627362	1.35052	0.386396	0.00382093	ENSG00000206417	H1FX-AS1		antisense	Nuclear: Adult Only
ENSG00000206549.12_2	0.452527	0.229211		1.22664	0.47461	0.040574	ENSG00000206549	PRSS50	29122	protein_coding	Nuclear: Adult Only
ENSG00000206560.11_2	0.140087	0.160508	0.715908	0.538429	0.167969	0.00875148	ENSG00000206560	ANKRD28	23243	protein_coding	Nuclear: Adult Only
ENSG00000206561.12_2	0.290607	0.23683		1.07149	0.358718	0.0154266	ENSG00000206561	COLQ	8292	protein_coding	Nuclear: Adult Only
ENSG00000207611.1	0.442389	0.187329		1.51547	0.518823	0.0181965	ENSG00000207611	MIR149	406941	miRNA	Nuclear: Adult Only
ENSG00000209082.1	0.0200416	0.244307	0.980675	1.69411	0.390268	0.000236498	ENSG00000209082	MT-TL1		Mt_tRNA	Nuclear: Adult Only
ENSG00000210077.1	-0.00185337	0.153488		1.56056	0.346727	0.000129429	ENSG00000210077	MT-TV		Mt_tRNA	Nuclear: Adult Only
ENSG00000210082.2	0.0515676	0.14005	0.898617	1.68474	0.230928	1.07e-10	ENSG00000210082	MT-RNR2	100616263	Mt_rRNA	Nuclear: Adult Only
ENSG00000210140.1	0.168978	0.249729	0.789669	1.17969	0.363956	0.00792	ENSG00000210140	MT-TC		Mt_tRNA	Nuclear: Adult Only
ENSG00000210156.1	0.2008	0.185245		1.97345	0.452109	0.000217073	ENSG00000210156	MT-TK		Mt_tRNA	Nuclear: Adult Only
ENSG00000210164.1	0.119491	0.234519		1.68963	0.398129	0.000333561	ENSG00000210164	MT-TG		Mt_tRNA	Nuclear: Adult Only
ENSG00000210174.1	0.156892	0.207489		1.79735	0.416894	0.000264247	ENSG00000210174	MT-TR		Mt_tRNA	Nuclear: Adult Only
ENSG00000210176.1	-0.0187613	0.207129		1.42732	0.362332	0.000937764	ENSG00000210176	MT-TH		Mt_tRNA	Nuclear: Adult Only
ENSG00000210184.1	0.345173	0.235466		1.547	0.320871	3.8e-05	ENSG00000210184	MT-TS2		Mt_tRNA	Nuclear: Adult Only
ENSG00000210191.1	0.0623971	0.222927		1.4969	0.3358	0.000152366	ENSG00000210191	MT-TL2		Mt_tRNA	Nuclear: Adult Only
ENSG00000210194.1	0.103021	0.230928		1.40078	0.445335	0.0102342	ENSG00000210194	MT-TE		Mt_tRNA	Nuclear: Adult Only
ENSG00000210195.2	-0.0380818	0.0762823		1.35449	0.335093	0.000665463	ENSG00000210195	MT-TT		Mt_tRNA	Nuclear: Adult Only
ENSG00000210196.2	-0.264143	0.201346	0.530163	0.985074	0.249005	0.000888146	ENSG00000210196	MT-TP		Mt_tRNA	Nuclear: Adult Only
ENSG00000211459.2	-0.0378809	0.160453	0.940849	0.931174	0.248919	0.00179934	ENSG00000211459	MT-RNR1		Mt_rRNA	Nuclear: Adult Only
ENSG00000212123.3_2	0.253242	0.200151		1.56979	0.417023	0.00166924	ENSG00000212123	PRR22	163154	protein_coding	Nuclear: Adult Only
ENSG00000213047.11_2	0.390102	0.210203	0.331917	0.766493	0.268742	0.0216753	ENSG00000213047	DENND1B	163486	protein_coding	Nuclear: Adult Only
ENSG00000213199.7_2	0.519807	0.244399	0.253107	1.74739	0.265384	7.08e-09	ENSG00000213199	ASIC3	9311	protein_coding	Nuclear: Adult Only
ENSG00000213213.13_2	0.341684	0.249306		0.839321	0.331351	0.0456893	ENSG00000213213	CCDC183	84960	protein_coding	Nuclear: Adult Only
ENSG00000213221.4_2	0.350394	0.227178		1.29259	0.509185	0.045124	ENSG00000213221	DNLZ	728489	protein_coding	Nuclear: Adult Only
ENSG00000213339.8_2	0.106802	0.178424	0.8164	1.02238	0.248203	0.000510927	ENSG00000213339	QTRT1	81890	protein_coding	Nuclear: Adult Only
ENSG00000213347.10_2	0.477021	0.249226	0.314716	1.65878	0.359048	8.39e-05	ENSG00000213347	MXD3	83463	protein_coding	Nuclear: Adult Only
ENSG00000213397.10_2	0.432385	0.233532		2.46932	0.400156	6.47e-08	ENSG00000213397	HAUS7	55559	protein_coding	Nuclear: Adult Only
ENSG00000213398.7_2	0.390535	0.244069		0.876255	0.335001	0.0377554	ENSG00000213398	LCAT	3931	protein_coding	Nuclear: Adult Only
ENSG00000213676.10_2	-0.103838	0.131877	0.747399	0.62789	0.226424	0.0261935	ENSG00000213676	ATF6B	1388	protein_coding	Nuclear: Adult Only
ENSG00000213780.10_2	0.132672	0.228927		1.21226	0.474194	0.0433059	ENSG00000213780	GTF2H4	2968	protein_coding	Nuclear: Adult Only
ENSG00000213903.8_2	0.285048	0.246686		0.98266	0.380866	0.0409979	ENSG00000213903	LTB4R	1241	protein_coding	Nuclear: Adult Only
ENSG00000213918.10_2	0.424725	0.18979	0.224771	0.992825	0.251113	0.000894093	ENSG00000213918	DSE1	1773	protein_coding	Nuclear: Adult Only
ENSG00000213923.10_2	0.0302194	0.112997	0.929925	0.459304	0.170862	0.0320347	ENSG00000213923	CSNK1E	1454	protein_coding	Nuclear: Adult Only	Autism Spectrum Disorder (from SAFARI)
ENSG00000213928.8_2	0.313849	0.244094		1.65034	0.394979	0.000419864	ENSG00000213928	IRF9	10379	protein_coding	Nuclear: Adult Only
ENSG00000213930.11_2	0.34756	0.230142	0.450343	1.15442	0.312635	0.00208229	ENSG00000213930	GALT	2592	protein_coding	Nuclear: Adult Only
ENSG00000213937.3_2	0.076788	0.0996343		1.40295	0.387905	0.00264151	ENSG00000213937	CLDN9	9080	protein_coding	Nuclear: Adult Only
ENSG00000213983.11_2	0.6947	0.244367	0.0958859	2.96643	0.321673	1.25e-16	ENSG00000213983	AP1G2	8906	protein_coding	Nuclear: Adult Only
ENSG00000214021.15_2	0.453204	0.205395	0.232689	1.22333	0.287709	0.000323954	ENSG00000214021	TTLL3	26140	protein_coding	Nuclear: Adult Only
ENSG00000214022.11_2	0.38532	0.142509	0.121196	0.966357	0.161451	1.72e-07	ENSG00000214022	REPIN1	29803	protein_coding	Nuclear: Adult Only
ENSG00000214076.3_1	0.166773	0.201221		1.32481	0.497766	0.0340963	ENSG00000214076	CPSF1P1		processed_pseudogene	Nuclear: Adult Only
ENSG00000214078.12_2	0.022318	0.160557	0.970134	0.706751	0.243757	0.0192129	ENSG00000214078	CPNE1	8904	protein_coding	Nuclear: Adult Only
ENSG00000214193.9_2	0.706342	0.244298	0.0888715	1.94431	0.401515	3.54e-05	ENSG00000214193	SH3D21	79729	protein_coding	Nuclear: Adult Only
ENSG00000214279.12_2	0.314665	0.220718		1.73228	0.48157	0.0027974	ENSG00000214279		619207	transcribed_unitary_pseudogene	Nuclear: Adult Only
ENSG00000214357.8_1	0.347194	0.170108	0.274286	0.976985	0.230062	0.000330677	ENSG00000214357	NEURL1B	54492	protein_coding	Nuclear: Adult Only
ENSG00000214402.6_2	0.795204	0.237351		1.4321	0.510183	0.0241852	ENSG00000214402	LCNL1	401562	protein_coding	Nuclear: Adult Only
ENSG00000214548.14_2	0.349351	0.249539	0.492171	1.59442	0.27251	3.47e-07	ENSG00000214548	MEG3	55384	lincRNA	Nuclear: Adult Only
ENSG00000214595.11_1	0.322755	0.250129	0.539847	1.28429	0.236961	2.84e-06	ENSG00000214595	EML6	400954	protein_coding	Nuclear: Adult Only
ENSG00000214655.10_2	0.317865	0.153431	0.265297	1.49462	0.302374	2.33e-05	ENSG00000214655	ZSWIM8	23053	protein_coding	Nuclear: Adult Only
ENSG00000214706.10_2	0.490913	0.187558	0.139855	0.841429	0.241382	0.0039231	ENSG00000214706	IFRD2	7866	protein_coding	Nuclear: Adult Only
ENSG00000214826.5_1	0.442961	0.244239		1.48348	0.495349	0.0150995	ENSG00000214826	DDX12P	440081	unprocessed_pseudogene	Nuclear: Adult Only
ENSG00000214940.4	0.188366	0.249561		1.44384	0.374401	0.00123577	ENSG00000214940	NPIPA8	101930075	protein_coding	Nuclear: Adult Only
ENSG00000215018.9_1	0.00733523	0.232432		1.80372	0.356196	1.42e-05	ENSG00000215018	COL28A1	340267	protein_coding	Nuclear: Adult Only	Autism Spectrum Disorder (from SAFARI)
ENSG00000215041.9_2	0.453617	0.170036	0.129652	0.913575	0.209869	0.000226829	ENSG00000215041	NEURL4	84461	protein_coding	Nuclear: Adult Only
ENSG00000215193.12_2	0.0951986	0.137104	0.782286	0.585787	0.231299	0.0457155	ENSG00000215193	PEX26	55670	protein_coding	Nuclear: Adult Only
ENSG00000215252.11_1	0.539556	0.176269	0.0632699	1.64144	0.371515	0.000177302	ENSG00000215252	GOLGA8B	101930583	protein_coding	Nuclear: Adult Only
ENSG00000215375.6_1	0.703495	0.246335		1.3106	0.266138	2.53e-05	ENSG00000215375	MYL5	4636	protein_coding	Nuclear: Adult Only
ENSG00000215481.8_1	0.23297	0.246712		1.22643	0.43173	0.0223311	ENSG00000215481	BCRP3		transcribed_unprocessed_pseudogene	Nuclear: Adult Only
ENSG00000215769.8_2	0.492517	0.249673		1.12986	0.31322	0.00271486	ENSG00000215769		102464831	processed_transcript	Nuclear: Adult Only
ENSG00000215790.6_2	0.267599	0.22582	0.584453	1.13011	0.384771	0.0175055	ENSG00000215790	SLC35E2	728661	protein_coding	Nuclear: Adult Only
ENSG00000217801.9_1	0.553738	0.250135		1.10951	0.300342	0.00207147	ENSG00000217801		100288175	transcribed_unprocessed_pseudogene	Nuclear: Adult Only
ENSG00000218227.3_1	-0.0120391	0.227456	0.988546	0.876749	0.33842	0.0400692	ENSG00000218227			processed_pseudogene	Nuclear: Adult Only
ENSG00000218416.4_1	0.715054	0.229346	0.0567354	1.22936	0.326924	0.00168998	ENSG00000218416			processed_transcript	Nuclear: Adult Only
ENSG00000220201.7_2	0.185146	0.248597	0.763749	1.55912	0.394432	0.000896196	ENSG00000220201	ZGLP1	100125288	protein_coding	Nuclear: Adult Only
ENSG00000221598.1	0.0523128	0.0664391		1.52363	0.482814	0.00998162	ENSG00000221598	MIR1249	100302149	miRNA	Nuclear: Adult Only
ENSG00000221829.9_1	0.346656	0.168064	0.267704	1.0559	0.318254	0.00641024	ENSG00000221829	FANCG	2189	protein_coding	Nuclear: Adult Only
ENSG00000221968.8_2	0.669405	0.218329	0.0628117	0.856137	0.240619	0.00315626	ENSG00000221968	FADS3	3995	protein_coding	Nuclear: Adult Only
ENSG00000221978.11_1	0.491409	0.193109	0.155208	1.26183	0.253441	2.02e-05	ENSG00000221978	CCNL2	81669	protein_coding	Nuclear: Adult Only
ENSG00000222009.8_1	0.0645357	0.224009		1.23916	0.387306	0.00888154	ENSG00000222009	BTBD19	149478	protein_coding	Nuclear: Adult Only
ENSG00000222019.7_1	0.242172	0.193697		1.3193	0.444066	0.0160822	ENSG00000222019	URAHP	100130015	transcribed_unprocessed_pseudogene	Nuclear: Adult Only
ENSG00000223403.3_1	0.196982	0.179802		2.12522	0.371604	6.53e-07	ENSG00000223403	MEG9	100507257	lincRNA	Nuclear: Adult Only
ENSG00000223553.6_2				1.29558	0.512925	0.046325	ENSG00000223553	SMPD4P1		transcribed_unprocessed_pseudogene	Nuclear: Adult Only
ENSG00000223705.9_1	0.439799	0.200881	0.236015	1.57243	0.257689	9.21e-08	ENSG00000223705	NSUN5P1	155400	transcribed_unprocessed_pseudogene	Nuclear: Adult Only
ENSG00000223745.7_2	0.0364955	0.247397		0.99181	0.290497	0.00484148	ENSG00000223745		101930643	processed_transcript	Nuclear: Adult Only
ENSG00000223768.1_1	0.247309	0.216469	0.60204	0.779105	0.229931	0.0051971	ENSG00000223768	LINC00205		lincRNA	Nuclear: Adult Only
ENSG00000223855.1_1	0.47663	0.217414		1.69507	0.393618	0.000267915	ENSG00000223855		441307	lincRNA	Nuclear: Adult Only
ENSG00000223959.8_1	0.432815	0.202862	0.250268	0.958654	0.289982	0.00664489	ENSG00000223959	AFG3L1P	172	unitary_pseudogene	Nuclear: Adult Only
ENSG00000224078.12_2	0.374262	0.155645	0.185169	1.07509	0.201294	4.07e-06	ENSG00000224078	SNHG14	101930404	processed_transcript	Nuclear: Adult Only
ENSG00000224387.1_1	0.208947	0.155523		2.33254	0.480731	3.4e-05	ENSG00000224387			antisense	Nuclear: Adult Only
ENSG00000224660.1_1	0.227025	0.245471	0.695351	1.21966	0.32983	0.00204666	ENSG00000224660	SH3BP5-AS1	100505696	antisense	Nuclear: Adult Only
ENSG00000224713.4_1	0.463188	0.213446		2.44578	0.447506	2.28e-06	ENSG00000224713			antisense	Nuclear: Adult Only
ENSG00000224769.1_1	0.0252465	0.112644		1.46967	0.495248	0.0162085	ENSG00000224769			unprocessed_pseudogene	Nuclear: Adult Only
ENSG00000224888.4_1	0.0280362	0.200491		1.10779	0.367239	0.0143429	ENSG00000224888		100289580	antisense	Nuclear: Adult Only
ENSG00000224940.8_2	0.620796	0.235659	0.136769	0.864981	0.291168	0.0160893	ENSG00000224940	PRRT4	401399	protein_coding	Nuclear: Adult Only
ENSG00000224963.3_2	0.178326	0.14757		1.70859	0.512631	0.00612153	ENSG00000224963		100509091	transcribed_unitary_pseudogene	Nuclear: Adult Only
ENSG00000225190.9_2	0.411536	0.190132	0.241254	0.889526	0.223008	0.00079076	ENSG00000225190	PLEKHM1	9842	protein_coding	Nuclear: Adult Only
ENSG00000225630.1_1	-0.106594	0.247974	0.878148	1.0883	0.31673	0.00453461	ENSG00000225630	MTND2P28		unprocessed_pseudogene	Nuclear: Adult Only
ENSG00000225670.4_1	0.55755	0.243442	0.211072	1.89087	0.457858	0.000491373	ENSG00000225670		100131825	antisense	Nuclear: Adult Only
ENSG00000225746.9_2	0.148446	0.212405		0.83254	0.291282	0.0213483	ENSG00000225746		100507242	lincRNA	Nuclear: Adult Only
ENSG00000225756.1_1	0.435217	0.248568		1.15613	0.380862	0.0136738	ENSG00000225756	DBH-AS1	138948	antisense	Nuclear: Adult Only
ENSG00000225783.6_2	0.596443	0.21521	0.108609	1.01726	0.317724	0.00883724	ENSG00000225783	MIAT	440823	lincRNA	Nuclear: Adult Only
ENSG00000225872.3_2	0.51603	0.250158	0.267704	1.27942	0.372386	0.00453787	ENSG00000225872		644050	transcribed_unprocessed_pseudogene	Nuclear: Adult Only
ENSG00000226210.3_1	0.56232	0.180127	0.0564094	0.831885	0.236881	0.00362917	ENSG00000226210			unprocessed_pseudogene	Nuclear: Adult Only
ENSG00000226332.2_1	0.435478	0.203702		1.41021	0.471317	0.0152147	ENSG00000226332			antisense	Nuclear: Adult Only
ENSG00000226416.1_1	0.457428	0.201504		1.22384	0.451481	0.0304467	ENSG00000226416	MRPL23-AS1	100133545	antisense	Nuclear: Adult Only
ENSG00000226450.2_1	0.439858	0.23249		1.92057	0.511293	0.00171313	ENSG00000226450	CYP2D8P		unprocessed_pseudogene	Nuclear: Adult Only
ENSG00000227051.6_2	0.441551	0.180254	0.175947	0.833169	0.208023	0.000746534	ENSG00000227051	C14orf132	101929186	protein_coding	Nuclear: Adult Only
ENSG00000227232.5_1	0.655021	0.216841	0.0693101	1.031	0.278118	0.00199226	ENSG00000227232	WASH7P	100287171	unprocessed_pseudogene	Nuclear: Adult Only
ENSG00000227372.11_2	0.303014	0.178009	0.383092	0.898761	0.240252	0.00179934	ENSG00000227372	TP73-AS1	57212	unitary_pseudogene	Nuclear: Adult Only
ENSG00000227473.1_1	0.159857	0.139931		1.65371	0.517089	0.0089066	ENSG00000227473	TSSK5P1		unitary_pseudogene	Nuclear: Adult Only
ENSG00000227719.1_1	0.166909	0.147552		1.82207	0.471298	0.00119689	ENSG00000227719			antisense	Nuclear: Adult Only
ENSG00000227775.3_1	0.221903	0.184329	0.576702	1.12115	0.43865	0.0433457	ENSG00000227775			transcribed_processed_pseudogene	Nuclear: Adult Only
ENSG00000227827.3_1	0.502946	0.247433	0.276313	2.17403	0.432885	1.69e-05	ENSG00000227827		399491	unprocessed_pseudogene	Nuclear: Adult Only
ENSG00000227953.6_1	0.314066	0.23399		1.33101	0.384518	0.00420073	ENSG00000227953		149134	processed_transcript	Nuclear: Adult Only
ENSG00000228109.1_1	0.654992	0.217366	0.0702446	1.38565	0.323039	0.000286069	ENSG00000228109	MFI2-AS1	100507057	antisense	Nuclear: Adult Only
ENSG00000228252.8_1	0.14057	0.208267		1.22831	0.487737	0.0470733	ENSG00000228252	COL6A4P2		unitary_pseudogene	Nuclear: Adult Only
ENSG00000228376.3_1	0.0183477	0.0914195		1.22904	0.420259	0.0180652	ENSG00000228376		340508	transcribed_processed_pseudogene	Nuclear: Adult Only
ENSG00000228393.3_1	0.498831	0.248726		1.0552	0.369889	0.0216461	ENSG00000228393	LINC01004		antisense	Nuclear: Adult Only	Bipolar Affective Disorder (from GWAS)
ENSG00000228486.10_2	0.429504	0.243523		0.908712	0.331629	0.0283277	ENSG00000228486	LINC01125	728537	protein_coding	Nuclear: Adult Only
ENSG00000228544.1_1	0.459181	0.224142		1.37044	0.480935	0.021843	ENSG00000228544	CCDC183-AS1	100131193	antisense	Nuclear: Adult Only
ENSG00000228748.2_2	0.36663	0.224738		1.31202	0.508193	0.0408358	ENSG00000228748			antisense	Nuclear: Adult Only
ENSG00000229180.5_1	0.235192	0.235209		0.899838	0.307835	0.0181338	ENSG00000229180			lincRNA	Nuclear: Adult Only
ENSG00000229393.1_1	0.156994	0.119828		1.87391	0.475453	0.000932034	ENSG00000229393			antisense	Nuclear: Adult Only
ENSG00000229782.1_1	0.0118447	0.11821		1.25867	0.497641	0.045998	ENSG00000229782			antisense	Nuclear: Adult Only
ENSG00000229873.1_1	0.18478	0.160427		2.02162	0.501181	0.000683461	ENSG00000229873	OGFR-AS1	101409261	antisense	Nuclear: Adult Only
ENSG00000230415.1_1	0.317164	0.247366		1.7142	0.449646	0.00143128	ENSG00000230415			lincRNA	Nuclear: Adult Only
ENSG00000230453.9_1	0.0347487	0.0710993		1.22806	0.489509	0.0481657	ENSG00000230453	ANKRD18B	441459	protein_coding	Nuclear: Adult Only
ENSG00000230565.1_2	0.125547	0.248522		1.37597	0.51665	0.0339767	ENSG00000230565	ZNF32-AS2	414208	antisense	Nuclear: Adult Only
ENSG00000230733.2_1	0.136149	0.186933	0.76903	0.985987	0.245381	0.000714984	ENSG00000230733			lincRNA	Nuclear: Adult Only
ENSG00000230805.6_1	-0.0300068	0.0604528		1.88982	0.512081	0.00209522	ENSG00000230805			lincRNA	Nuclear: Adult Only
ENSG00000230910.2_1	0.183149	0.204173	0.706182	1.5398	0.267854	5.64e-07	ENSG00000230910			antisense	Nuclear: Adult Only
ENSG00000231160.9_2	0.231574	0.22799	0.651024	0.897427	0.316328	0.0225272	ENSG00000231160		79667	processed_transcript	Nuclear: Adult Only
ENSG00000231312.6_2	-0.0176669	0.243159		0.812849	0.242303	0.0057273	ENSG00000231312		728730	antisense	Nuclear: Adult Only
ENSG00000231563.1_1	0.0304348	0.154033		1.62572	0.426277	0.00142464	ENSG00000231563			antisense	Nuclear: Adult Only
ENSG00000231793.4_1	0.130765	0.161853		1.54504	0.520127	0.0160965	ENSG00000231793	DOC2GP	390213	unitary_pseudogene	Nuclear: Adult Only
ENSG00000232233.1_1	0.147026	0.159466		0.979588	0.329183	0.0158765	ENSG00000232233			lincRNA	Nuclear: Adult Only
ENSG00000232354.8_2	0.0127398	0.0604528		1.585	0.511475	0.0115827	ENSG00000232354	VIPR1-AS1		antisense	Nuclear: Adult Only
ENSG00000232406.6_1	-0.00150907	0.0604528		1.63179	0.292759	1.34e-06	ENSG00000232406		100130373	antisense	Nuclear: Adult Only
ENSG00000232434.2_1	0.395018	0.226327	0.37042	0.909377	0.185242	2.69e-05	ENSG00000232434	C9orf172	389813	protein_coding	Nuclear: Adult Only
ENSG00000232653.8_1	0.248574	0.224695		1.14506	0.324987	0.0034976	ENSG00000232653	GOLGA8N	643699	protein_coding	Nuclear: Adult Only
ENSG00000232931.5_1	0.318025	0.228977	0.496209	0.918122	0.31881	0.0202074	ENSG00000232931	LINC00342		lincRNA	Nuclear: Adult Only
ENSG00000233024.3	0.17056	0.244237		1.45806	0.400629	0.00246183	ENSG00000233024		101930008	protein_coding	Nuclear: Adult Only
ENSG00000233196.2_1	0.342241	0.176906		1.46734	0.463884	0.00978685	ENSG00000233196			processed_pseudogene	Nuclear: Adult Only
ENSG00000233198.3_1	0.357147	0.178549		1.4976	0.49073	0.0131067	ENSG00000233198	RNF224	643596	protein_coding	Nuclear: Adult Only
ENSG00000233542.1_1	0.04476	0.176915		1.19532	0.343957	0.00404502	ENSG00000233542			antisense	Nuclear: Adult Only
ENSG00000234394.8_2	0.0269887	0.0604528		1.46775	0.506219	0.0192129	ENSG00000234394		101929800	lincRNA	Nuclear: Adult Only
ENSG00000234409.6_1	1.01502	0.238787		1.86986	0.361448	8.64e-06	ENSG00000234409		388849	protein_coding	Nuclear: Adult Only
ENSG00000234616.8_2	0.535872	0.170958	0.0551741	0.926147	0.243338	0.00146141	ENSG00000234616	JRK		protein_coding	Nuclear: Adult Only
ENSG00000234769.7_1	0.442891	0.249492		1.01986	0.382096	0.0335288	ENSG00000234769	WASH4P	102466751	unprocessed_pseudogene	Nuclear: Adult Only
ENSG00000235027.1_1	0.264768	0.199998		1.48343	0.508722	0.0184324	ENSG00000235027			antisense	Nuclear: Adult Only
ENSG00000235106.9_2	-0.056556	0.153774	0.898751	0.756902	0.228805	0.00660663	ENSG00000235106	LINC00094	266655	protein_coding	Nuclear: Adult Only
ENSG00000235194.8_2	0.332308	0.217383	0.44314	0.596319	0.193353	0.0120352	ENSG00000235194	PPP1R3E	90673	protein_coding	Nuclear: Adult Only
ENSG00000235314.1_1	0.0666592	0.216226	0.917962	0.574534	0.2273	0.0461623	ENSG00000235314	LINC00957	255031	lincRNA	Nuclear: Adult Only
ENSG00000235703.5_2	0.403979	0.248059		2.11499	0.367673	5.55e-07	ENSG00000235703	LINC00894	100272228	antisense	Nuclear: Adult Only
ENSG00000235954.6_2	0.186809	0.186552	0.657759	0.928151	0.245373	0.00157332	ENSG00000235954	TTC28-AS1	284900	processed_transcript	Nuclear: Adult Only
ENSG00000235979.8_2	0.158476	0.230159		1.43623	0.460621	0.0109849	ENSG00000235979			lincRNA	Nuclear: Adult Only
ENSG00000236017.8_1	0.282695	0.244869		1.61098	0.402199	0.000746534	ENSG00000236017	ASMTL-AS1	80161	antisense	Nuclear: Adult Only
ENSG00000236144.6_1	0.607442	0.211888	0.0927367	1.14095	0.317977	0.00287716	ENSG00000236144		100506469	antisense	Nuclear: Adult Only
ENSG00000236333.3_1	-0.0542694	0.224103		0.700779	0.254448	0.0274169	ENSG00000236333	TRHDE-AS1	283392	processed_transcript	Nuclear: Adult Only
ENSG00000236540.7_2	0.152611	0.2446		0.981521	0.2728	0.00279352	ENSG00000236540			antisense	Nuclear: Adult Only
ENSG00000236609.3_1	0.468254	0.162131	0.0891418	0.901119	0.196051	9.23e-05	ENSG00000236609	ZNF853	54753	protein_coding	Nuclear: Adult Only
ENSG00000236871.7_1	0.159884	0.228747		2.23506	0.447464	1.89e-05	ENSG00000236871	LINC00106		lincRNA	Nuclear: Adult Only
ENSG00000237289.9_1	0.0403926	0.240233	0.961574	0.730733	0.221874	0.00688288	ENSG00000237289	CKMT1B	548596	protein_coding	Nuclear: Adult Only
ENSG00000237298.9_2	0.201263	0.24711		1.21102	0.403284	0.0147934	ENSG00000237298	TTN-AS1	100506866	antisense	Nuclear: Adult Only
ENSG00000237517.9_2	0.344907	0.220162	0.429198	0.820343	0.215854	0.00148718	ENSG00000237517	DGCR5		transcribed_unprocessed_pseudogene	Nuclear: Adult Only
ENSG00000238045.9_2	0.684534	0.250195		1.67058	0.369483	0.000119717	ENSG00000238045		100289283	antisense	Nuclear: Adult Only
ENSG00000238105.7_1	0.00874415	0.211101		1.2485	0.407444	0.0126913	ENSG00000238105	GOLGA2P5	55592	transcribed_unprocessed_pseudogene	Nuclear: Adult Only
ENSG00000238164.6_2	-0.00150907	0.0604528		1.22893	0.48942	0.0479245	ENSG00000238164		100133445	antisense	Nuclear: Adult Only
ENSG00000238227.7_2	0.227135	0.184847	0.56579	0.669955	0.189404	0.00336183	ENSG00000238227	C9orf69	90120	protein_coding	Nuclear: Adult Only
ENSG00000239382.10_2	0.264025	0.249317		0.935049	0.3218	0.0189321	ENSG00000239382	ALKBH6	84964	protein_coding	Nuclear: Adult Only
ENSG00000239779.6_2	0.591456	0.212276	0.105481	1.21372	0.249924	3.34e-05	ENSG00000239779	WBP1	23559	protein_coding	Nuclear: Adult Only
ENSG00000239887.4_2	0.565492	0.245375	0.20838	1.48125	0.40244	0.00216397	ENSG00000239887	C1orf226	400793	protein_coding	Nuclear: Adult Only
ENSG00000240038.6_2	0.250314	0.23927	0.639942	1.07928	0.280481	0.0012686	ENSG00000240038	AMY2B	648740	protein_coding	Nuclear: Adult Only
ENSG00000240053.8_2	0.0919245	0.248163	0.897673	1.87849	0.375147	1.81e-05	ENSG00000240053	LY6G5B	58496	protein_coding	Nuclear: Adult Only
ENSG00000240907.1	0.0269887	0.0604528		1.2053	0.448978	0.0323287	ENSG00000240907		101930570	lincRNA	Nuclear: Adult Only
ENSG00000241360.1_2	0.10116	0.233866	0.877553	0.993483	0.310067	0.00878571	ENSG00000241360	PDXP	57026	protein_coding	Nuclear: Adult Only
ENSG00000241489.7_2	0.263921	0.22988		1.34395	0.498521	0.0314785	ENSG00000241489			protein_coding	Nuclear: Adult Only
ENSG00000241769.7_2	0.149392	0.248195		1.46098	0.420124	0.00402192	ENSG00000241769	LINC00893	100131434	antisense	Nuclear: Adult Only
ENSG00000242086.8_2	0.141381	0.232502	0.812459	0.906346	0.354549	0.0433133	ENSG00000242086	LINC00969		lincRNA	Nuclear: Adult Only
ENSG00000242294.6_1	0.563088	0.247948	0.215299	1.5041	0.51157	0.0173787	ENSG00000242294	STAG3L5P	101735302	transcribed_unprocessed_pseudogene	Nuclear: Adult Only	Neurodegenerative Disorder
ENSG00000242686.4_1	0.746065	0.249101	0.0732771	1.68028	0.496864	0.00530119	ENSG00000242686		101928521	antisense	Nuclear: Adult Only
ENSG00000242802.6_1	0.453775	0.187426	0.179508	0.778378	0.216222	0.00277917	ENSG00000242802	AP5Z1	100616465	protein_coding	Nuclear: Adult Only	Schizophrenia (from rare SNVs)
ENSG00000242866.9_1	0.213639	0.214416		1.39733	0.415239	0.00554922	ENSG00000242866	STRC	101930630	protein_coding	Nuclear: Adult Only
ENSG00000243696.4_2	0.313961	0.207758		1.88412	0.429514	0.000200619	ENSG00000243696			protein_coding	Nuclear: Adult Only
ENSG00000243708.10_2	1.02262	0.245721		2.1632	0.499495	0.000244773	ENSG00000243708	PLA2G4B	100137049	protein_coding	Nuclear: Adult Only
ENSG00000243716.6	0.402875	0.178129	0.218084	1.04499	0.279584	0.00181598	ENSG00000243716	NPIPB5	101929906	protein_coding	Nuclear: Adult Only
ENSG00000243753.5_1	0.144502	0.236733		0.886105	0.329505	0.0319737	ENSG00000243753	HLA-L	3139	transcribed_unprocessed_pseudogene	Nuclear: Adult Only
ENSG00000244257.5_1	0.139681	0.224787		1.75516	0.516733	0.00508056	ENSG00000244257	PKD1P1		unprocessed_pseudogene	Nuclear: Adult Only
ENSG00000244486.8_2	0.455713	0.249535		1.11978	0.292936	0.0013832	ENSG00000244486	SCARF2	91179	protein_coding	Nuclear: Adult Only
ENSG00000244560.6_1	0.523982	0.249999	0.258998	2.24692	0.345081	1.03e-08	ENSG00000244560		155060	transcribed_unprocessed_pseudogene	Nuclear: Adult Only
ENSG00000245149.3_1	0.207267	0.240071	0.719245	1.21032	0.417908	0.0193593	ENSG00000245149	RNF139-AS1	101927612	lincRNA	Nuclear: Adult Only
ENSG00000245849.6_1	0.145794	0.244973		1.03269	0.316016	0.00738586	ENSG00000245849	RAD51-AS1	100505648	processed_transcript	Nuclear: Adult Only
ENSG00000246451.2_1	0.349928	0.248964	0.489659	1.34182	0.391066	0.00459548	ENSG00000246451			antisense	Nuclear: Adult Only
ENSG00000246982.6_1	0.14715	0.226813		0.995848	0.394332	0.0463668	ENSG00000246982			antisense	Nuclear: Adult Only
ENSG00000248019.2_1	0.599919	0.247497	0.179508	1.20978	0.402508	0.014729	ENSG00000248019	FAM13A-AS1	285512	antisense	Nuclear: Adult Only
ENSG00000248124.7_1	-0.205693	0.204609	0.656076	0.772517	0.272791	0.0227862	ENSG00000248124	RRN3P1		transcribed_unprocessed_pseudogene	Nuclear: Adult Only
ENSG00000248514.1_1	0.283458	0.184502		1.85175	0.512971	0.00269394	ENSG00000248514			antisense	Nuclear: Adult Only
ENSG00000249106.1_1	0.335843	0.215687		2.18135	0.465489	6.4e-05	ENSG00000249106		101928590	antisense	Nuclear: Adult Only
ENSG00000249115.8_2	0.417397	0.181121	0.20838	0.975336	0.261084	0.0018258	ENSG00000249115	HAUS5	23354	protein_coding	Nuclear: Adult Only
ENSG00000249669.8_2	0.175053	0.198636		1.67305	0.3462	3.64e-05	ENSG00000249669	MIR143HG	728264	lincRNA	Nuclear: Adult Only
ENSG00000249715.9_2	0.00430278	0.179661		1.87986	0.423656	0.000165145	ENSG00000249715	FER1L5		protein_coding	Nuclear: Adult Only	Bipolar Affective Disorder (from GWAS)
[truncated: 2,960 more rows]

## Sheet: Table S3 DEGs by Age
Table S3: Differentially Expressed Genes by Age in Cytoplasmic and Nuclear Samples
	In Cytoplasm			In Nucleus										Column Name	Description
Gene ID	LFC	SE	FDR	LFC	SE	FDR	Ensembl ID	Symbol	Entrez ID	Gene Type	Group	Nuclear Pore Complex Gene?		Gene ID	The gencode ID of the gene
ENSG00000000003.14_1	1.93305	0.234914	2.53362e-15	2.20326	0.282701	8.87823e-14	ENSG00000000003	TSPAN6	7105	protein_coding	both_decreasing			Ensembl ID	The Ensembl ID associated with the gene
ENSG00000000460.16_2	2.36779	0.480965	4.19574e-06	1.67978	0.442753	0.000580289	ENSG00000000460	C1orf112	55732	protein_coding	both_decreasing			Symbol	The common gene symbol
ENSG00000001167.14_1	2.15114	0.223884	1.461e-20	1.87214	0.206963	2.87479e-18	ENSG00000001167	NFYA	4800	protein_coding	both_decreasing			Entrez ID	The Entrez ID of the gene
ENSG00000001617.11_1	3.02889	0.258685	4.30825e-30	3.29264	0.278208	1.14914e-30	ENSG00000001617	SEMA3F	6405	protein_coding	both_decreasing			Gene Type	The type of the gene
ENSG00000001629.9_2	1.5783	0.24979	2.01368e-09	1.05067	0.218664	8.35383e-06	ENSG00000001629	ANKIB1	54467	protein_coding	both_decreasing			Group	The fraction-regulated gene set of the gene
ENSG00000001630.15_2	2.02576	0.546851	0.000713903	2.09864	0.369869	9.89977e-08	ENSG00000001630	CYP51A1	1595	protein_coding	both_decreasing			Nuclear Pore Complex Gene?	Whether or not the gene is included in the nuclear pore complex (NPC) tested in the paper
ENSG00000002587.9_2	1.72062	0.246626	2.81997e-11	2.12027	0.277603	2.86773e-13	ENSG00000002587	HS3ST1	9957	protein_coding	both_decreasing
ENSG00000002834.17_2	0.984343	0.243312	0.000195454	0.827902	0.188645	5.41506e-05	ENSG00000002834	LASP1	3927	protein_coding	both_decreasing			The following were reported for the comparison between fractions in cytoplasmic samples and nuclear samples:
ENSG00000003436.14_1	1.67	0.572127	0.00918991	1.42023	0.511304	0.0152673	ENSG00000003436	TFPI	7035	protein_coding	both_decreasing
ENSG00000003756.16_2	1.18855	0.195336	8.31968e-09	0.688075	0.218176	0.00508771	ENSG00000003756	RBM5	10181	protein_coding	both_decreasing			LFC	log2(Fold Change) between prenatal and adult (positive value indicates higher expression in prenatal)
ENSG00000004139.13_2	1.8318	0.372124	4.20362e-06	1.37848	0.258807	6.37344e-07	ENSG00000004139	SARM1	23098	protein_coding	both_decreasing			SE	standard error
ENSG00000004487.15_2	1.75618	0.162368	8.10155e-26	2.19423	0.177755	2.71493e-33	ENSG00000004487	KDM1A	23028	protein_coding	both_decreasing			FDR	false discovery rate corrected p-value
ENSG00000004700.15_2	1.90935	0.345331	1.92231e-07	1.47754	0.312458	1.19021e-05	ENSG00000004700	RECQL	5965	protein_coding	both_decreasing
ENSG00000004777.18_2	2.76191	0.271797	6.85427e-23	1.78005	0.202673	2.86514e-17	ENSG00000004777	ARHGAP33	115703	protein_coding	both_decreasing
ENSG00000004848.7_2	0.659736	0.207702	0.00425228	1.32732	0.25338	1.0061e-06	ENSG00000004848	ARX	170302	protein_coding	both_decreasing
ENSG00000004866.19_2	1.43068	0.189308	4.51295e-13	1.31413	0.204649	1.21788e-09	ENSG00000004866	ST7	102466616	protein_coding	both_decreasing
ENSG00000004939.13_1	2.84905	1.08664	0.0206973	2.74203	0.996239	0.0163411	ENSG00000004939	SLC4A1	6521	protein_coding	both_decreasing
ENSG00000005108.15_2	1.02688	0.285217	0.00103876	1.29956	0.269545	7.75093e-06	ENSG00000005108	THSD7A	221981	protein_coding	both_decreasing
ENSG00000005156.11_2	0.94466	0.241068	0.000319147	1.14435	0.250955	2.55503e-05	ENSG00000005156	LIG3	3980	protein_coding	both_decreasing
ENSG00000005249.12_1	1.11871	0.196747	8.14677e-08	1.22772	0.236433	1.2701e-06	ENSG00000005249	PRKAR2B	5577	protein_coding	both_decreasing
ENSG00000005339.14_2	1.77052	0.219885	1.03184e-14	1.58651	0.192707	2.80195e-15	ENSG00000005339	CREBBP	1387	protein_coding	both_decreasing
ENSG00000005483.20_2	1.89471	0.274942	5.01629e-11	1.52474	0.173372	2.59248e-17	ENSG00000005483	KMT2E	55904	protein_coding	both_decreasing
ENSG00000005801.16_2	1.75685	0.17932	2.39312e-21	1.12465	0.213735	8.90198e-07	ENSG00000005801	ZNF195	7748	protein_coding	both_decreasing
ENSG00000005889.15_1	1.01445	0.317375	0.00399646	0.897482	0.317866	0.0134396	ENSG00000005889	ZFX	7543	protein_coding	both_decreasing
ENSG00000006125.16_2	0.667585	0.181377	0.000777779	0.809962	0.188777	8.20268e-05	ENSG00000006125	AP2B1	163	protein_coding	both_decreasing
ENSG00000006451.7_2	1.30928	0.172663	3.7417e-13	1.43272	0.194991	2.39208e-12	ENSG00000006451	RALA	5898	protein_coding	both_decreasing
ENSG00000006459.10_1	1.17667	0.232713	2.19573e-06	1.0884	0.248329	5.55199e-05	ENSG00000006459	KDM7A	80853	protein_coding	both_decreasing
ENSG00000006576.16_1	1.12237	0.202942	1.90743e-07	0.693017	0.211048	0.0033781	ENSG00000006576	PHTF2	57157	protein_coding	both_decreasing
ENSG00000006634.7_1	1.33256	0.362222	0.000782875	0.968929	0.368947	0.0228898	ENSG00000006634	DBF4	10926	protein_coding	both_decreasing
ENSG00000006704.10_2	1.9056	0.244192	7.09029e-14	1.4755	0.226369	6.57612e-10	ENSG00000006704	GTF2IRD1	9569	protein_coding	both_decreasing
ENSG00000006756.15_1	1.25732	0.397007	0.00437718	1.53525	0.346458	4.50911e-05	ENSG00000006756	ARSD	414	protein_coding	both_decreasing
ENSG00000007062.11_2	3.73248	0.35107	5.73031e-25	3.0901	0.343727	4.71259e-18	ENSG00000007062	PROM1	8842	protein_coding	both_decreasing
ENSG00000007350.16_2	4.77983	1.23958	0.00040608	6.04523	0.910972	3.08752e-10	ENSG00000007350	TKTL1	8277	protein_coding	both_decreasing
ENSG00000007968.6_1	4.80896	1.04766	1.96203e-05	4.22594	1.21699	0.00181445	ENSG00000007968	E2F2	1870	protein_coding	both_decreasing
ENSG00000008083.13_1	1.39939	0.261768	5.08147e-07	0.758749	0.211574	0.0012262	ENSG00000008083	JARID2	3720	protein_coding	both_decreasing
ENSG00000008294.20_1	0.901649	0.197368	2.16155e-05	0.724957	0.172481	0.000117688	ENSG00000008294	SPAG9	9043	protein_coding	both_decreasing
ENSG00000008300.15_2	2.13289	0.310493	5.80749e-11	1.3647	0.201252	1.19656e-10	ENSG00000008300	CELSR3	1951	protein_coding	both_decreasing
ENSG00000008405.11_2	1.50154	0.217613	4.73122e-11	1.52868	0.220009	3.89287e-11	ENSG00000008405	CRY1	1407	protein_coding	both_decreasing
ENSG00000008441.16_2	2.18703	0.341403	1.16483e-09	1.81475	0.195109	2.89643e-19	ENSG00000008441	NFIX	4784	protein_coding	both_decreasing
ENSG00000008513.14_2	1.46387	0.315381	1.55466e-05	1.15382	0.233376	4.33658e-06	ENSG00000008513	ST3GAL1	6482	protein_coding	both_decreasing
ENSG00000008869.11_1	1.22162	0.271018	2.8313e-05	1.0004	0.214937	1.67433e-05	ENSG00000008869	HEATR5B	54497	protein_coding	both_decreasing
ENSG00000009307.15_2	0.910983	0.164197	1.73548e-07	1.0649	0.21374	3.61169e-06	ENSG00000009307	CSDE1	7812	protein_coding	both_decreasing
ENSG00000009413.15_2	2.61382	0.229354	1.46295e-28	1.58364	0.199418	2.82185e-14	ENSG00000009413	REV3L	5980	protein_coding	both_decreasing
ENSG00000009694.13_2	1.76548	0.258675	7.8108e-11	1.27554	0.257706	4.22136e-06	ENSG00000009694	TENM1	10178	protein_coding	both_decreasing
ENSG00000009844.15_1	1.0323	0.164562	2.65959e-09	1.34526	0.188728	1.13444e-11	ENSG00000009844	VTA1	51534	protein_coding	both_decreasing
ENSG00000009954.10_1	1.47599	0.252123	3.1636e-08	1.33742	0.212245	2.55008e-09	ENSG00000009954	BAZ1B	9031	protein_coding	both_decreasing
ENSG00000010244.17_2	0.776432	0.1732	3.15264e-05	0.753009	0.183091	0.000169556	ENSG00000010244	ZNF207	7756	protein_coding	both_decreasing
ENSG00000010810.17_2	1.00526	0.168635	1.71236e-08	1.24151	0.189742	5.60698e-10	ENSG00000010810	FYN	2534	protein_coding	both_decreasing
ENSG00000010932.15_1	2.90848	1.14311	0.025232	3.88452	1.17141	0.00303992	ENSG00000010932	FMO1	2326	protein_coding	both_decreasing
ENSG00000011007.12_1	1.54796	0.183302	4.34904e-16	1.66306	0.201827	2.64461e-15	ENSG00000011007	TCEB3	6924	protein_coding	both_decreasing
ENSG00000011114.14_2	1.68544	0.305268	2.00567e-07	1.0175	0.240375	0.000103981	ENSG00000011114	BTBD7	55727	protein_coding	both_decreasing
ENSG00000011198.7_1	1.19265	0.367838	0.00345944	1.01098	0.360281	0.0141083	ENSG00000011198	ABHD5	51099	protein_coding	both_decreasing
ENSG00000011243.17_2	0.926746	0.187433	3.78615e-06	0.634526	0.243749	0.024293	ENSG00000011243	AKAP8L	26993	protein_coding	both_decreasing
ENSG00000011258.15_2	3.08361	0.298677	1.3373e-23	1.75254	0.209918	1.09475e-15	ENSG00000011258	MBTD1	54799	protein_coding	both_decreasing
ENSG00000011304.18_2	1.51321	0.224708	1.42511e-10	0.920534	0.252975	0.00101721	ENSG00000011304	PTBP1	100616459	protein_coding	both_decreasing
ENSG00000011332.19_2	0.997377	0.191111	9.74437e-07	0.705053	0.205843	0.00212031	ENSG00000011332	DPF1	8193	protein_coding	both_decreasing
ENSG00000011451.17_2	1.82533	0.304943	1.4834e-08	0.728658	0.193135	0.000627117	ENSG00000011451	WIZ	58525	protein_coding	both_decreasing
ENSG00000011523.13_1	0.488785	0.199344	0.0318362	0.460768	0.175074	0.022555	ENSG00000011523	CEP68	23177	protein_coding	both_decreasing
ENSG00000011638.10_2	1.80284	0.347281	1.12141e-06	2.18917	0.294083	1.18879e-12	ENSG00000011638	TMEM159	57146	protein_coding	both_decreasing
ENSG00000011677.12_1	0.452776	0.164047	0.014305	0.584788	0.228832	0.0273818	ENSG00000011677	GABRA3	2556	protein_coding	both_decreasing
ENSG00000012232.8_1	1.14491	0.214549	5.33702e-07	0.912689	0.195047	1.49698e-05	ENSG00000012232	EXTL3	2137	protein_coding	both_decreasing
ENSG00000012660.13_2	0.873734	0.283123	0.00560522	1.01065	0.202976	3.66577e-06	ENSG00000012660	ELOVL5	60481	protein_coding	both_decreasing
ENSG00000012983.11_1	1.47696	0.191365	1.36023e-13	0.627303	0.242836	0.025514	ENSG00000012983	MAP4K5	11183	protein_coding	both_decreasing
ENSG00000013375.15_2	0.892529	0.201379	3.92376e-05	0.864475	0.236438	0.000955998	ENSG00000013375	PGM3	5238	protein_coding	both_decreasing
ENSG00000013441.15_1	1.91217	0.204765	1.80345e-19	0.608985	0.222739	0.0171645	ENSG00000013441	CLK1	1195	protein_coding	both_decreasing
ENSG00000014164.6_1	0.819554	0.276687	0.00811916	1.06229	0.236258	3.39087e-05	ENSG00000014164	ZC3H3	23144	protein_coding	both_decreasing
ENSG00000015133.18_1	2.2569	0.295875	2.68154e-13	1.94539	0.281244	4.80547e-11	ENSG00000015133	CCDC88C	440193	protein_coding	both_decreasing
ENSG00000015171.18_2	0.812609	0.189524	7.29551e-05	0.664208	0.198837	0.00280383	ENSG00000015171	ZMYND11	10771	protein_coding	both_decreasing
ENSG00000015413.9_2	4.55219	1.00121	2.37637e-05	4.81727	0.962156	3.21196e-06	ENSG00000015413	DPEP1	1800	protein_coding	both_decreasing
ENSG00000018189.12_2	0.584734	0.183996	0.0042309	0.972911	0.202333	8.22326e-06	ENSG00000018189	RUFY3	22902	protein_coding	both_decreasing
ENSG00000018510.13_2	0.656458	0.188812	0.00159518	0.660564	0.196824	0.0026673	ENSG00000018510	AGPS	8540	protein_coding	both_decreasing
ENSG00000018699.11_1	1.75862	0.296436	2.01477e-08	2.01296	0.36433	2.22673e-07	ENSG00000018699	TTC27	55622	protein_coding	both_decreasing
ENSG00000019549.8_1	3.73275	0.465332	1.30413e-14	2.95867	0.383542	1.62411e-13	ENSG00000019549	SNAI2	6591	protein_coding	both_decreasing
ENSG00000019995.6_2	1.03494	0.440653	0.0408138	0.59524	0.219275	0.0180998	ENSG00000019995	ZRANB1	54764	protein_coding	both_decreasing
ENSG00000020256.19_2	0.957148	0.223098	7.22316e-05	0.934038	0.240798	0.000423474	ENSG00000020256	ZFP64	55734	protein_coding	both_decreasing
ENSG00000021574.11_1	1.80647	0.15879	1.81973e-28	1.68413	0.194805	9.29286e-17	ENSG00000021574	SPAST	6683	protein_coding	both_decreasing
ENSG00000021762.19_2	1.79493	0.28171	1.44758e-09	1.30633	0.216423	1.25684e-08	ENSG00000021762	OSBPL5	114879	protein_coding	both_decreasing
ENSG00000021776.10_2	0.779426	0.232458	0.00242421	0.552736	0.200513	0.0161501	ENSG00000021776	AQR	9716	protein_coding	both_decreasing
ENSG00000023318.7_2	0.802001	0.192404	0.000118928	0.825257	0.211157	0.000378373	ENSG00000023318	ERP44	23071	protein_coding	both_decreasing
ENSG00000023902.13_1	0.717812	0.290635	0.0304686	1.02045	0.188085	3.78781e-07	ENSG00000023902	PLEKHO1	51177	protein_coding	both_decreasing
ENSG00000025039.14_1	0.849743	0.201436	9.71156e-05	0.613438	0.219539	0.014573	ENSG00000025039	RRAGD	58528	protein_coding	both_decreasing
ENSG00000025156.12_1	1.21256	0.187297	7.63294e-10	1.4658	0.212798	5.85147e-11	ENSG00000025156	HSF2	3298	protein_coding	both_decreasing
ENSG00000025293.16_2	1.18676	0.202517	3.06073e-08	1.21802	0.194555	3.26773e-09	ENSG00000025293	PHF20	51230	protein_coding	both_decreasing
ENSG00000025796.13_1	0.795561	0.155016	1.50605e-06	1.02439	0.190396	4.79859e-07	ENSG00000025796	SEC63	11231	protein_coding	both_decreasing
ENSG00000026950.16_2	2.40238	0.341303	1.8418e-11	1.90106	0.314723	1.22431e-08	ENSG00000026950	BTN3A1	11119	protein_coding	both_decreasing
ENSG00000027001.9_2	1.1564	0.298793	0.000384693	0.981037	0.336087	0.0102686	ENSG00000027001	MIPEP	4285	protein_coding	both_decreasing
ENSG00000027644.4_1	3.44032	0.985918	0.0015265	3.2166	0.742777	6.92893e-05	ENSG00000027644	INSRR	3645	protein_coding	both_decreasing
ENSG00000028203.17_1	0.890935	0.195644	2.30356e-05	0.603897	0.205534	0.00972957	ENSG00000028203	VEZT	55591	protein_coding	both_decreasing
ENSG00000028277.21_2	2.1345	0.28754	1.21615e-12	1.63415	0.257731	1.99921e-09	ENSG00000028277	POU2F2	5452	protein_coding	both_decreasing
ENSG00000029363.15_2	0.934878	0.162722	5.85435e-08	1.0386	0.169951	8.05529e-09	ENSG00000029363	BCLAF1	9774	protein_coding	both_decreasing
ENSG00000029725.16_2	0.448827	0.178358	0.0270507	0.437694	0.188503	0.0481775	ENSG00000029725	RABEP1	9135	protein_coding	both_decreasing
ENSG00000029993.14_1	2.07109	0.174961	9.77934e-31	2.59016	0.226786	1.3066e-28	ENSG00000029993	HMGB3	3149	protein_coding	both_decreasing
ENSG00000030066.13_2	3.29873	0.264685	5.41992e-34	2.24697	0.216019	7.16575e-24	ENSG00000030066	NUP160	23279	protein_coding	both_decreasing	NPC Gene
ENSG00000030419.16_2	1.63212	0.363227	3.0114e-05	1.39228	0.346321	0.00024564	ENSG00000030419	IKZF2	22807	protein_coding	both_decreasing
ENSG00000032219.18_1	1.42449	0.197113	5.01862e-12	1.04756	0.189499	2.19073e-07	ENSG00000032219	ARID4A	5926	protein_coding	both_decreasing
ENSG00000033030.13_1	1.88159	0.260783	5.44628e-12	0.836756	0.244619	0.00215219	ENSG00000033030	ZCCHC8	55596	protein_coding	both_decreasing
ENSG00000033122.18_2	1.52258	0.166263	9.29466e-19	0.856326	0.230543	0.00077622	ENSG00000033122	LRRC7	57554	protein_coding	both_decreasing
ENSG00000033178.12_1	1.17999	0.168827	2.59377e-11	0.974508	0.205116	1.07537e-05	ENSG00000033178	UBA6	55236	protein_coding	both_decreasing
ENSG00000033327.12_2	1.70501	0.27161	2.58779e-09	1.50678	0.220016	7.63012e-11	ENSG00000033327	GAB2	9846	protein_coding	both_decreasing
ENSG00000033800.13_1	0.776046	0.332453	0.0422247	0.673513	0.217161	0.0059781	ENSG00000033800	PIAS1	8554	protein_coding	both_decreasing
ENSG00000033867.16_2	2.16142	0.234406	5.24955e-19	1.98871	0.24624	9.76851e-15	ENSG00000033867	SLC4A7	9497	protein_coding	both_decreasing
ENSG00000035499.12_1	3.01161	0.467711	9.49982e-10	2.82583	0.424756	2.77673e-10	ENSG00000035499	DEPDC1B	55789	protein_coding	both_decreasing
ENSG00000035862.12_2	0.646544	0.141351	2.10862e-05	0.655673	0.195886	0.00274298	ENSG00000035862	TIMP2	7077	protein_coding	both_decreasing
ENSG00000035928.14_2	0.562756	0.194651	0.00994397	0.772245	0.211727	0.000986307	ENSG00000035928	RFC1	5981	protein_coding	both_decreasing
ENSG00000036549.12_2	1.14172	0.199769	6.91278e-08	0.76941	0.200422	0.000491253	ENSG00000036549	ZZZ3	26009	protein_coding	both_decreasing
ENSG00000037637.10_2	0.853644	0.182587	1.33422e-05	0.812039	0.19281	0.0001136	ENSG00000037637	FBXO42	54455	protein_coding	both_decreasing
ENSG00000037749.11_2	2.75857	0.486312	8.76455e-08	2.5141	0.327244	2.05314e-13	ENSG00000037749	MFAP3	4238	protein_coding	both_decreasing
ENSG00000037757.13_2	1.03294	0.271291	0.000487694	0.769443	0.276216	0.0149345	ENSG00000037757	MRI1	84245	protein_coding	both_decreasing
ENSG00000038219.12_1	0.712728	0.244602	0.00931934	0.977642	0.191576	1.98968e-06	ENSG00000038219	BOD1L1	259282	protein_coding	both_decreasing
ENSG00000038358.14_2	1.33399	0.446297	0.0074948	0.862198	0.218869	0.000336179	ENSG00000038358	EDC4	23644	protein_coding	both_decreasing
ENSG00000038382.17_1	2.04792	0.305806	1.81899e-10	1.59895	0.219555	3.82069e-12	ENSG00000038382	TRIO	7204	protein_coding	both_decreasing
ENSG00000038427.15_2	3.80632	0.255876	3.97842e-48	4.18475	0.228001	7.05533e-73	ENSG00000038427	VCAN	1462	protein_coding	both_decreasing
ENSG00000039123.15_2	0.646645	0.227754	0.011507	0.85363	0.201491	0.000102476	ENSG00000039123	SKIV2L2	23517	protein_coding	both_decreasing
ENSG00000039560.13_1	3.889	0.272593	2.5379e-44	3.41767	0.269663	4.64738e-35	ENSG00000039560	RAI14	26064	protein_coding	both_decreasing
ENSG00000040275.16_2	1.5848	0.272724	4.04468e-08	1.30042	0.307362	0.000104844	ENSG00000040275	SPDL1	54908	protein_coding	both_decreasing
ENSG00000041515.15_1	3.56584	0.280401	2.31765e-35	2.73068	0.273937	5.36832e-22	ENSG00000041515	MYO16	23026	protein_coding	both_decreasing
ENSG00000041802.10_1	0.47568	0.198524	0.0364422	0.558011	0.237727	0.0454625	ENSG00000041802	LSG1	55341	protein_coding	both_decreasing
ENSG00000041982.15_2	4.2205	0.895201	1.11305e-05	4.37071	0.881772	4.07541e-06	ENSG00000041982	TNC	3371	protein_coding	both_decreasing
ENSG00000042088.13_2	1.53782	0.26032	2.32936e-08	1.15366	0.246715	1.51828e-05	ENSG00000042088	TDP1	55775	protein_coding	both_decreasing
ENSG00000042429.10_2	1.49836	0.195458	2.01363e-13	1.3406	0.229836	4.03288e-08	ENSG00000042429	MED17	9440	protein_coding	both_decreasing
ENSG00000042832.11_1	4.5976	0.684285	1.57605e-10	3.73485	0.605687	5.76983e-09	ENSG00000042832	TG	7038	protein_coding	both_decreasing
ENSG00000044446.11_1	1.33104	0.250412	5.95518e-07	0.697528	0.253557	0.0164004	ENSG00000044446	PHKA2	5256	protein_coding	both_decreasing
ENSG00000044459.14_1	1.85354	0.404439	2.02582e-05	1.48666	0.439676	0.00245623	ENSG00000044459	CNTLN	54875	protein_coding	both_decreasing
ENSG00000044524.10_1	3.72087	0.194823	6.19155e-79	3.38397	0.227788	6.71375e-48	ENSG00000044524	EPHA3	2042	protein_coding	both_decreasing
ENSG00000046647.13_1	0.677431	0.263263	0.0234537	0.922901	0.274058	0.00256811	ENSG00000046647	GEMIN8	54960	protein_coding	both_decreasing
ENSG00000047230.14_1	1.99026	0.274562	4.28954e-12	1.51333	0.25455	2.12652e-08	ENSG00000047230	CTPS2	56474	protein_coding	both_decreasing
ENSG00000047315.14_1	1.56668	0.248074	2.05337e-09	1.41592	0.203926	4.02484e-11	ENSG00000047315	POLR2B	5431	protein_coding	both_decreasing
ENSG00000047410.13_1	1.56595	0.21043	1.06247e-12	1.68882	0.193638	4.86632e-17	ENSG00000047410	TPR	7175	protein_coding	both_decreasing	NPC Gene
ENSG00000047648.21_2	1.06945	0.447711	0.0370921	1.04358	0.395143	0.0220088	ENSG00000047648	ARHGAP6	395	protein_coding	both_decreasing
ENSG00000047662.4_1	2.68735	0.315979	2.63774e-16	1.91397	0.297861	1.1862e-09	ENSG00000047662	FAM184B	27146	protein_coding	both_decreasing
ENSG00000047849.21_2	0.500074	0.177368	0.0121494	0.638447	0.191979	0.00294386	ENSG00000047849	MAP4	4134	protein_coding	both_decreasing
ENSG00000048052.21_2	1.21279	0.167794	4.98124e-12	1.05636	0.206779	1.9361e-06	ENSG00000048052	HDAC9	9734	protein_coding	both_decreasing
ENSG00000048342.15_1	1.41073	0.226376	3.42205e-09	1.47811	0.255984	5.63644e-08	ENSG00000048342	CC2D2A	57545	protein_coding	both_decreasing
ENSG00000048405.9_2	1.0036	0.280417	0.00112187	0.949011	0.294164	0.00405756	ENSG00000048405	ZNF800	168850	protein_coding	both_decreasing
ENSG00000048471.13_2	2.18855	0.258535	3.66738e-16	1.82197	0.201612	3.10454e-18	ENSG00000048471	SNX29	101929304	protein_coding	both_decreasing
ENSG00000048540.14_2	1.30055	0.163798	2.47113e-14	1.50165	0.186252	1.09018e-14	ENSG00000048540	LMO3	55885	protein_coding	both_decreasing
ENSG00000048649.13_2	1.62849	0.232859	2.52227e-11	1.46465	0.173077	4.28588e-16	ENSG00000048649	RSF1	51773	protein_coding	both_decreasing
ENSG00000048740.18_2	1.39064	0.213841	6.3497e-10	1.13713	0.193929	3.39347e-08	ENSG00000048740	CELF2	10659	protein_coding	both_decreasing
ENSG00000049167.13_2	1.17562	0.300849	0.000332822	0.938602	0.311228	0.007744	ENSG00000049167	ERCC8	1161	protein_coding	both_decreasing
ENSG00000049239.12_1	0.754755	0.330268	0.0470914	0.650185	0.239337	0.0180073	ENSG00000049239	H6PD	9563	protein_coding	both_decreasing
ENSG00000049618.22_2	1.24185	0.237765	9.53326e-07	0.939984	0.188722	3.63691e-06	ENSG00000049618	ARID1B	57492	protein_coding	both_decreasing
ENSG00000049759.17_2	1.67884	0.177678	6.52551e-20	1.33195	0.162632	3.9486e-15	ENSG00000049759	NEDD4L	23327	protein_coding	both_decreasing
ENSG00000050030.13_1	2.20972	0.181236	1.45842e-32	1.51927	0.219302	4.47206e-11	ENSG00000050030	KIAA2022	340533	protein_coding	both_decreasing
ENSG00000050344.8_1	2.47454	0.345328	7.65471e-12	0.983783	0.347773	0.0132462	ENSG00000050344	NFE2L3	9603	protein_coding	both_decreasing
ENSG00000051180.16_1	1.86044	0.810217	0.0459676	2.56605	0.852977	0.00791178	ENSG00000051180	RAD51	5888	protein_coding	both_decreasing
ENSG00000051620.10_1	1.73111	0.340915	1.97383e-06	2.01603	0.299544	1.66754e-10	ENSG00000051620	HEBP2	23593	protein_coding	both_decreasing
ENSG00000052723.11_1	0.828549	0.207418	0.000238559	0.65865	0.223737	0.00957014	ENSG00000052723	SIKE1	80143	protein_coding	both_decreasing
ENSG00000052795.12_2	0.996619	0.165413	1.18165e-08	0.572701	0.20041	0.0122164	ENSG00000052795	FNIP2	57600	protein_coding	both_decreasing
ENSG00000052802.12_2	1.01335	0.167722	1.06929e-08	1.22785	0.173459	1.59411e-11	ENSG00000052802	MSMO1	6307	protein_coding	both_decreasing
ENSG00000052841.14_2	1.459	0.277467	7.9658e-07	0.682406	0.222236	0.00655771	ENSG00000052841	TTC17	55761	protein_coding	both_decreasing
ENSG00000052850.5_1	2.84765	0.838276	0.00209387	2.56776	0.707654	0.00105517	ENSG00000052850	ALX4	60529	protein_coding	both_decreasing
ENSG00000053254.15_2	2.25439	0.263657	1.80933e-16	2.02105	0.192819	3.16843e-24	ENSG00000053254	FOXN3	1112	protein_coding	both_decreasing
ENSG00000053438.8_1	3.12112	0.242502	3.31836e-36	3.57982	0.25928	1.85326e-41	ENSG00000053438	NNAT	4826	protein_coding	both_decreasing
ENSG00000054118.13_2	0.89999	0.189501	9.49612e-06	0.948854	0.186522	2.15994e-06	ENSG00000054118	THRAP3	9967	protein_coding	both_decreasing
ENSG00000054267.20_2	1.00084	0.176381	8.67531e-08	0.801691	0.187828	8.99695e-05	ENSG00000054267	ARID4B	51742	protein_coding	both_decreasing
ENSG00000054654.15_2	3.25819	0.280306	1.1337e-29	3.00205	0.25495	2.30055e-30	ENSG00000054654	SYNE2	23224	protein_coding	both_decreasing
ENSG00000055044.10_1	0.691898	0.188813	0.000825457	0.662129	0.201415	0.00334002	ENSG00000055044	NOP58	51602	protein_coding	both_decreasing
ENSG00000055070.16_1	1.01819	0.214557	9.65718e-06	0.788962	0.233711	0.00250008	ENSG00000055070	SZRD1	26099	protein_coding	both_decreasing
ENSG00000055208.18_2	0.775641	0.172499	2.97235e-05	0.775811	0.204938	0.000598477	ENSG00000055208	TAB2	23118	protein_coding	both_decreasing
ENSG00000055609.17_2	2.0585	0.243707	4.28555e-16	1.27769	0.204863	3.77316e-09	ENSG00000055609	KMT2C	58508	protein_coding	both_decreasing
ENSG00000056277.15_1	1.92783	0.339527	8.49841e-08	1.14345	0.31903	0.001235	ENSG00000056277	ZNF280C	55609	protein_coding	both_decreasing
ENSG00000056487.15_2	3.07452	0.394404	7.55551e-14	2.50052	0.358057	3.05861e-11	ENSG00000056487	PHF21B	112885	protein_coding	both_decreasing
ENSG00000056586.15_1	1.32958	0.164489	8.09757e-15	1.05919	0.192609	2.56033e-07	ENSG00000056586	RC3H2	54542	protein_coding	both_decreasing
ENSG00000057019.15_2	0.559418	0.198725	0.0122955	0.571041	0.207737	0.0164923	ENSG00000057019	DCBLD2	131566	protein_coding	both_decreasing
ENSG00000057608.16_2	0.94599	0.143946	4.09457e-10	1.35138	0.234358	5.89978e-08	ENSG00000057608	GDI2	2665	protein_coding	both_decreasing
ENSG00000058056.8_1	1.1807	0.28376	0.000122444	0.992901	0.250548	0.000306717	ENSG00000058056	USP13	8975	protein_coding	both_decreasing
ENSG00000058262.9_1	1.44774	0.187916	1.50748e-13	1.25573	0.197024	1.63513e-09	ENSG00000058262	SEC61A1	29927	protein_coding	both_decreasing
ENSG00000058600.15_2	0.696268	0.21578	0.00363464	0.546753	0.197432	0.0156132	ENSG00000058600	POLR3E	101060521	protein_coding	both_decreasing
ENSG00000058673.15_2	1.03886	0.199676	1.05832e-06	0.655214	0.198323	0.00316374	ENSG00000058673	ZC3H11A	441155	protein_coding	both_decreasing
ENSG00000058804.11_1	1.0261	0.230183	3.50831e-05	0.642316	0.23649	0.0180325	ENSG00000058804	NDC1	55706	protein_coding	both_decreasing	NPC Gene
ENSG00000059573.8_1	0.935974	0.211429	4.01444e-05	0.807282	0.227749	0.00141243	ENSG00000059573	ALDH18A1	5832	protein_coding	both_decreasing
ENSG00000060138.12_1	1.57381	0.354961	3.89652e-05	1.69124	0.298293	1.0136e-07	ENSG00000060138	YBX3	8531	protein_coding	both_decreasing
ENSG00000060339.13_2	1.21531	0.168652	5.80188e-12	0.945206	0.180492	1.01428e-06	ENSG00000060339	CCAR1	55749	protein_coding	both_decreasing
ENSG00000060656.19_1	0.781525	0.279011	0.0127833	0.705237	0.245407	0.0116629	ENSG00000060656	PTPRU	10076	protein_coding	both_decreasing
ENSG00000060688.12_2	0.63513	0.261411	0.0336226	1.01231	0.284795	0.00136529	ENSG00000060688	SNRNP40	9410	protein_coding	both_decreasing
ENSG00000060749.14_1	2.69929	0.32725	2.16924e-15	1.93195	0.248166	9.48506e-14	ENSG00000060749	QSER1	79832	protein_coding	both_decreasing
ENSG00000061337.15_2	0.856895	0.267622	0.00392822	0.589975	0.218218	0.0186529	ENSG00000061337	LZTS1	11178	protein_coding	both_decreasing
ENSG00000062038.13_2	1.62346	0.325289	3.02344e-06	1.20596	0.330363	0.000976461	ENSG00000062038	CDH3	1001	protein_coding	both_decreasing
ENSG00000062370.16_2	2.07639	0.272198	2.67538e-13	1.47771	0.294096	2.94296e-06	ENSG00000062370	ZNF112	7771	protein_coding	both_decreasing
ENSG00000062650.17_1	1.36673	0.233952	3.39727e-08	1.11764	0.199655	1.50263e-07	ENSG00000062650	WAPAL	23063	protein_coding	both_decreasing
ENSG00000062822.12_2	1.89007	0.301076	2.58309e-09	1.82277	0.333823	3.14836e-07	ENSG00000062822	POLD1	5424	protein_coding	both_decreasing
ENSG00000063015.19_2	2.66679	0.205473	8.45655e-37	2.89185	0.185305	8.82683e-53	ENSG00000063015	SEZ6	124925	protein_coding	both_decreasing
ENSG00000063046.17_2	1.2033	0.147196	3.90926e-15	2.09655	0.198849	1.65781e-24	ENSG00000063046	EIF4B	1975	protein_coding	both_decreasing
ENSG00000063169.10_2	1.43884	0.241432	1.72506e-08	0.927556	0.231396	0.000257255	ENSG00000063169	GLTSCR1	29998	protein_coding	both_decreasing
ENSG00000063244.12_2	1.01634	0.209318	5.78457e-06	1.30586	0.186419	2.65284e-11	ENSG00000063244	U2AF2	11338	protein_coding	both_decreasing
ENSG00000064042.17_2	1.95656	0.260716	6.67815e-13	1.84992	0.242228	2.88097e-13	ENSG00000064042	LIMCH1	22998	protein_coding	both_decreasing
ENSG00000064270.12_1	1.12428	0.327034	0.0018255	1.11375	0.31446	0.00142676	ENSG00000064270	ATP2C2	9914	protein_coding	both_decreasing
ENSG00000064300.8_2	2.75223	0.457797	1.27449e-08	3.98195	0.827486	8.0878e-06	ENSG00000064300	NGFR	4804	protein_coding	both_decreasing
ENSG00000064309.14_1	3.0065	0.311037	8.46122e-21	2.14897	0.329516	6.42781e-10	ENSG00000064309	CDON	50937	protein_coding	both_decreasing
ENSG00000064313.11_2	1.88712	0.248726	3.626e-13	1.1521	0.227511	2.41956e-06	ENSG00000064313	TAF2	6873	protein_coding	both_decreasing
ENSG00000064419.13_1	1.20242	0.271112	3.87463e-05	1.05883	0.200032	7.57747e-07	ENSG00000064419	TNPO3	23534	protein_coding	both_decreasing
ENSG00000064547.13_2	4.43702	0.303373	1.52681e-46	3.74064	0.274978	2.82082e-40	ENSG00000064547	LPAR2	9170	protein_coding	both_decreasing
ENSG00000064666.14_2	1.76502	0.625185	0.0120245	2.06501	0.583394	0.00143732	ENSG00000064666	CNN2	1265	protein_coding	both_decreasing
ENSG00000064692.18_2	3.77781	0.2771	1.59675e-40	3.40286	0.262744	1.39516e-36	ENSG00000064692	SNCAIP	9627	protein_coding	both_decreasing
ENSG00000064703.11_1	1.06389	0.233613	2.30196e-05	1.24627	0.260958	9.59446e-06	ENSG00000064703	DDX20	11218	protein_coding	both_decreasing
ENSG00000065135.9_2	2.08516	0.247003	4.45637e-16	1.38937	0.207247	1.9877e-10	ENSG00000065135	GNAI3	2773	protein_coding	both_decreasing
ENSG00000065150.18_2	0.3634	0.155562	0.042061	0.408303	0.175675	0.0479613	ENSG00000065150	IPO5	3843	protein_coding	both_decreasing	NPC Gene
ENSG00000065183.15_1	1.6593	0.201831	2.69449e-15	1.77704	0.241242	2.09264e-12	ENSG00000065183	WDR3	10885	protein_coding	both_decreasing
ENSG00000065243.19_2	1.07228	0.20474	8.87536e-07	0.721514	0.248505	0.0107249	ENSG00000065243	PKN2	5586	protein_coding	both_decreasing
ENSG00000065320.8_1	1.4409	0.353578	0.000173537	1.4401	0.354182	0.000203926	ENSG00000065320	NTN1	9423	protein_coding	both_decreasing
ENSG00000065328.16_1	5.73398	1.10469	1.12525e-06	5.10491	0.969729	8.79255e-07	ENSG00000065328	MCM10	55388	protein_coding	both_decreasing
ENSG00000065413.17_2	3.85263	0.441612	4.20625e-17	3.18807	0.295718	1.3765e-25	ENSG00000065413	ANKRD44	91526	protein_coding	both_decreasing
ENSG00000065427.14_2	0.635728	0.154809	0.000153049	1.19185	0.230975	1.49643e-06	ENSG00000065427	KARS	3735	protein_coding	both_decreasing
ENSG00000065526.10_1	2.40484	0.31913	5.30577e-13	2.15238	0.188535	1.37695e-28	ENSG00000065526	SPEN	23013	protein_coding	both_decreasing
ENSG00000065600.12_1	1.17698	0.198116	1.92058e-08	1.5753	0.3035	1.28379e-06	ENSG00000065600	TMEM206	55248	protein_coding	both_decreasing
ENSG00000065615.13_1	1.26717	0.213107	1.86354e-08	1.04833	0.238972	5.45907e-05	ENSG00000065615	CYB5R4	51167	protein_coding	both_decreasing
ENSG00000065809.13_2	2.08295	0.246513	4.17908e-16	1.76271	0.268144	4.60571e-10	ENSG00000065809	FAM107B	83641	protein_coding	both_decreasing
ENSG00000065883.14_1	0.997354	0.221905	2.99743e-05	0.724299	0.204262	0.0014058	ENSG00000065883	CDK13	8621	protein_coding	both_decreasing
ENSG00000065911.11_1	1.76734	0.336637	8.3112e-07	1.99125	0.361544	2.44608e-07	ENSG00000065911	MTHFD2	10797	protein_coding	both_decreasing
ENSG00000065970.8_1	1.16652	0.220972	7.1784e-07	1.25691	0.20163	3.84336e-09	ENSG00000065970	FOXJ2	55810	protein_coding	both_decreasing
ENSG00000065978.18_2	3.97192	0.185451	3.85691e-99	4.53074	0.24915	1.51375e-71	ENSG00000065978	YBX1	4904	protein_coding	both_decreasing
ENSG00000066044.14_2	1.00794	0.227749	4.03431e-05	0.959536	0.207954	2.00235e-05	ENSG00000066044	ELAVL1	1994	protein_coding	both_decreasing
ENSG00000066117.14_1	1.8322	0.27991	4.84256e-10	1.53303	0.183267	9.59886e-16	ENSG00000066117	SMARCD1	6602	protein_coding	both_decreasing
ENSG00000066135.12_1	1.96411	0.206369	3.43797e-20	1.62555	0.184989	2.75939e-17	ENSG00000066135	KDM4A	9682	protein_coding	both_decreasing
ENSG00000066279.16_2	3.76321	0.679474	1.82759e-07	3.09749	0.89986	0.00200669	ENSG00000066279	ASPM	259266	protein_coding	both_decreasing
ENSG00000066382.16_1	1.21913	0.266266	2.06501e-05	1.13011	0.235494	8.58845e-06	ENSG00000066382	MPPED2	744	protein_coding	both_decreasing
ENSG00000066455.12_1	0.464652	0.192801	0.035261	0.637482	0.245482	0.0246602	ENSG00000066455	GOLGA5	9950	protein_coding	both_decreasing
ENSG00000066557.5_1	1.31452	0.182739	6.33793e-12	1.0492	0.210239	3.46957e-06	ENSG00000066557	LRRC40	55631	protein_coding	both_decreasing
ENSG00000066629.16_2	3.29471	0.214125	1.87358e-51	2.87153	0.198977	3.02812e-45	ENSG00000066629	EML1	2009	protein_coding	both_decreasing
ENSG00000066697.14_2	1.02531	0.201875	1.96283e-06	1.13883	0.224173	2.23515e-06	ENSG00000066697	MSANTD3	91283	protein_coding	both_decreasing
ENSG00000066735.14_2	2.92286	0.2938	5.55433e-22	2.28024	0.30438	8.43401e-13	ENSG00000066735	KIF26A	26153	protein_coding	both_decreasing
ENSG00000066777.8_2	0.922323	0.197842	1.4177e-05	1.06364	0.201858	8.5777e-07	ENSG00000066777	ARFGEF1	10565	protein_coding	both_decreasing
ENSG00000066827.15_1	1.05662	0.378463	0.0131124	1.50969	0.34199	4.85278e-05	ENSG00000066827	ZFAT	57623	protein_coding	both_decreasing
ENSG00000066855.15_1	1.40965	0.313383	2.95014e-05	1.54716	0.291711	7.17225e-07	ENSG00000066855	MTFR1	9650	protein_coding	both_decreasing
ENSG00000066923.17_2	1.25131	0.426472	0.00879754	0.903628	0.228182	0.000310076	ENSG00000066923	STAG3	10734	protein_coding	both_decreasing
ENSG00000066933.15_2	1.03695	0.26176	0.000271254	0.503715	0.215339	0.0462994	ENSG00000066933	MYO9A	4649	protein_coding	both_decreasing
ENSG00000067082.14_1	2.82042	0.199243	1.2197e-43	2.33724	0.221334	1.4019e-24	ENSG00000067082	KLF6	1316	protein_coding	both_decreasing
ENSG00000067141.16_1	3.46401	0.314108	8.37652e-27	3.27845	0.189571	9.78009e-65	ENSG00000067141	NEO1	4756	protein_coding	both_decreasing
ENSG00000067248.9_1	1.21712	0.18202	1.94466e-10	1.14892	0.224237	1.79826e-06	ENSG00000067248	DHX29	54505	protein_coding	both_decreasing
ENSG00000067334.13_1	0.61427	0.17268	0.00120663	0.997326	0.2438	0.000184858	ENSG00000067334	DNTTIP2	30836	protein_coding	both_decreasing
ENSG00000067369.13_2	1.3992	0.388388	0.00103036	1.71877	0.186349	5.88347e-19	ENSG00000067369	TP53BP1	7158	protein_coding	both_decreasing
ENSG00000067596.10_2	0.775693	0.231624	0.00245768	0.963559	0.208176	1.87475e-05	ENSG00000067596	DHX8	1659	protein_coding	both_decreasing
ENSG00000067798.14_2	2.32736	0.217366	2.58705e-25	1.47047	0.2271	8.67136e-10	ENSG00000067798	NAV3	89795	protein_coding	both_decreasing
ENSG00000067900.7_2	1.88501	0.237028	2.24082e-14	1.39917	0.238927	3.54006e-08	ENSG00000067900	ROCK1	6093	protein_coding	both_decreasing
ENSG00000067955.13_2	1.65662	0.248154	2.08981e-10	1.05015	0.217923	7.83557e-06	ENSG00000067955	CBFB	865	protein_coding	both_decreasing
ENSG00000068001.13_2	0.829082	0.365358	0.0488224	1.27035	0.286268	4.38723e-05	ENSG00000068001	HYAL2	8692	protein_coding	both_decreasing
ENSG00000068097.14_2	1.08736	0.255743	8.46977e-05	1.054	0.253079	0.000137531	ENSG00000068097	HEATR6	63897	protein_coding	both_decreasing
ENSG00000068438.14_1	0.665821	0.247135	0.0170981	1.01119	0.238716	0.000102713	ENSG00000068438	FTSJ1	24140	protein_coding	both_decreasing
ENSG00000068489.12_2	2.2612	0.588553	0.000428131	2.31982	0.567714	0.00018832	ENSG00000068489	PRR11	55771	protein_coding	both_decreasing
ENSG00000068615.17_2	1.64359	0.148374	4.92436e-27	1.43551	0.205271	2.86319e-11	ENSG00000068615	REEP1	65055	protein_coding	both_decreasing
ENSG00000068654.15_1	1.51676	0.294377	1.36101e-06	0.878116	0.201987	6.45631e-05	ENSG00000068654	POLR1A	25885	protein_coding	both_decreasing
ENSG00000068745.14_1	1.1267	0.210513	4.91582e-07	1.48187	0.189141	6.4634e-14	ENSG00000068745	IP6K2	51447	protein_coding	both_decreasing
ENSG00000068784.12_1	1.45555	0.298187	5.11956e-06	1.65994	0.388633	8.88877e-05	ENSG00000068784	SRBD1	55133	protein_coding	both_decreasing
ENSG00000068796.16_2	1.75298	0.257703	9.08102e-11	1.96202	0.230715	3.03637e-16	ENSG00000068796	KIF2A	3796	protein_coding	both_decreasing
ENSG00000068878.14_1	1.2622	0.239511	7.50758e-07	0.588784	0.19598	0.00800813	ENSG00000068878	PSME4	23198	protein_coding	both_decreasing
ENSG00000069188.16_1	3.15358	0.305388	1.30769e-23	2.82174	0.232632	3.59804e-32	ENSG00000069188	SDK2	54549	protein_coding	both_decreasing
ENSG00000069275.12_1	0.693252	0.238258	0.00943235	1.08566	0.204508	6.99339e-07	ENSG00000069275	NUCKS1	64710	protein_coding	both_decreasing
ENSG00000069956.11_2	0.724821	0.192851	0.000585767	0.693171	0.220483	0.00524961	ENSG00000069956	MAPK6	5597	protein_coding	both_decreasing
ENSG00000069998.12_1	0.64152	0.224717	0.0110233	0.643421	0.199147	0.00399711	ENSG00000069998	CECR5	27440	protein_coding	both_decreasing
ENSG00000070018.8_1	2.01092	0.179656	1.40276e-27	1.65925	0.22016	6.04154e-13	ENSG00000070018	LRP6	4040	protein_coding	both_decreasing
ENSG00000070047.11_1	0.954891	0.255223	0.000623814	0.739207	0.181393	0.000196714	ENSG00000070047	PHRF1	57661	protein_coding	both_decreasing
ENSG00000070193.4_2	1.79076	0.588004	0.00632671	3.28856	0.694884	1.16991e-05	ENSG00000070193	FGF10	2255	protein_coding	both_decreasing
ENSG00000070366.13_2	1.38412	0.523472	0.0195614	0.890929	0.241838	0.000865564	ENSG00000070366	SMG6	23293	protein_coding	both_decreasing
ENSG00000070367.15_1	1.18122	0.172007	5.88433e-11	1.08083	0.179941	1.49327e-08	ENSG00000070367	EXOC5	10640	protein_coding	both_decreasing
ENSG00000070371.15_2	1.71416	0.324115	6.83073e-07	1.39287	0.328122	9.90936e-05	ENSG00000070371	CLTCL1	8218	protein_coding	both_decreasing
ENSG00000070476.14_1	1.58594	0.271627	3.46122e-08	1.18243	0.249749	1.15937e-05	ENSG00000070476	ZXDC	79364	protein_coding	both_decreasing
ENSG00000070495.14_1	1.47195	0.239949	6.1773e-09	1.43415	0.21975	6.25177e-10	ENSG00000070495	JMJD6	23210	protein_coding	both_decreasing
ENSG00000070501.11_1	0.841236	0.263046	0.00397634	1.30377	0.227956	7.66755e-08	ENSG00000070501	POLB	5423	protein_coding	both_decreasing
ENSG00000070756.14_2	2.62201	0.18803	2.27509e-42	2.71256	0.208998	9.84985e-37	ENSG00000070756	PABPC1	26986	protein_coding	both_decreasing
ENSG00000070778.12_1	1.48375	0.265515	1.39339e-07	1.10252	0.234791	1.3888e-05	ENSG00000070778	PTPN21	11099	protein_coding	both_decreasing
ENSG00000070831.15_2	0.781426	0.184555	9.10748e-05	1.13508	0.211556	5.19175e-07	ENSG00000070831	CDC42	998	protein_coding	both_decreasing
ENSG00000070950.9_2	1.11931	0.296656	0.000554734	1.21594	0.317624	0.000510703	ENSG00000070950	RAD18	56852	protein_coding	both_decreasing
ENSG00000071051.13_2	1.48037	0.166704	1.08412e-17	1.07038	0.210667	2.22766e-06	ENSG00000071051	NCK2	8440	protein_coding	both_decreasing
ENSG00000071054.16_2	2.54913	0.297143	1.42602e-16	2.26939	0.248403	1.28659e-18	ENSG00000071054	MAP4K4	9448	protein_coding	both_decreasing
ENSG00000071127.16_1	0.883984	0.189829	1.45227e-05	1.20016	0.182844	4.9083e-10	ENSG00000071127	WDR1	9948	protein_coding	both_decreasing
ENSG00000071246.10_2	2.77316	0.363129	2.50624e-13	2.2054	0.234519	1.13e-19	ENSG00000071246	VASH1	22846	protein_coding	both_decreasing
ENSG00000071539.13_1	1.44122	0.31229	1.75326e-05	1.74991	0.415009	0.000111301	ENSG00000071539	TRIP13	9319	protein_coding	both_decreasing
ENSG00000071564.14_2	2.07969	0.277235	6.82886e-13	1.82976	0.283232	9.54111e-10	ENSG00000071564	TCF3	6929	protein_coding	both_decreasing
ENSG00000071794.15_1	0.489178	0.151982	0.00372961	0.463078	0.186635	0.032981	ENSG00000071794	HLTF	6596	protein_coding	both_decreasing
ENSG00000071894.15_2	0.990991	0.228357	5.84007e-05	0.757651	0.266572	0.0127655	ENSG00000071894	CPSF1	102466749	protein_coding	both_decreasing
ENSG00000072121.15_2	1.36097	0.255464	5.58294e-07	0.906984	0.211535	8.30585e-05	ENSG00000072121	ZFYVE26	23503	protein_coding	both_decreasing
ENSG00000072315.3_1	1.47137	0.536165	0.014932	1.30847	0.470242	0.0150627	ENSG00000072315	TRPC5	7224	protein_coding	both_decreasing
ENSG00000072364.12_1	1.55979	0.240201	6.75087e-10	1.34073	0.172247	9.56303e-14	ENSG00000072364	AFF4	27125	protein_coding	both_decreasing
ENSG00000072401.14_1	0.875946	0.221116	0.000271237	1.07674	0.215649	3.42811e-06	ENSG00000072401	UBE2D1	7321	protein_coding	both_decreasing
ENSG00000072501.17_1	1.84502	0.269662	6.99522e-11	1.89523	0.203152	2.25011e-19	ENSG00000072501	SMC1A	8243	protein_coding	both_decreasing
ENSG00000072609.17_2	1.66786	0.277232	1.24452e-08	0.859207	0.213839	0.000247718	ENSG00000072609	CHFR	55743	protein_coding	both_decreasing
ENSG00000072736.18_2	2.03675	0.42675	8.52303e-06	1.4835	0.363105	0.000188782	ENSG00000072736	NFATC3	4775	protein_coding	both_decreasing
ENSG00000072832.14_1	3.00339	0.153852	1.89325e-82	3.01329	0.18968	1.12456e-54	ENSG00000072832	CRMP1	1400	protein_coding	both_decreasing
ENSG00000072840.12_1	2.86718	0.41619	5.08899e-11	2.90638	0.395147	2.26509e-12	ENSG00000072840	EVC	2121	protein_coding	both_decreasing
ENSG00000072849.10_2	0.810083	0.207741	0.00034343	1.06134	0.240914	5.04538e-05	ENSG00000072849	DERL2	51009	protein_coding	both_decreasing
ENSG00000073111.13_2	1.74321	0.339901	1.53361e-06	1.84731	0.339822	3.5771e-07	ENSG00000073111	MCM2	4171	protein_coding	both_decreasing
ENSG00000073331.17_2	3.46884	0.400648	7.32482e-17	2.37675	0.332104	9.27233e-12	ENSG00000073331	ALPK1	80216	protein_coding	both_decreasing
ENSG00000073536.17_1	0.87231	0.242473	0.00104951	0.631001	0.213269	0.00916585	ENSG00000073536	NLE1	54475	protein_coding	both_decreasing
ENSG00000073584.18_2	1.49627	0.186458	1.27434e-14	1.48989	0.220554	1.41779e-10	ENSG00000073584	SMARCE1	6605	protein_coding	both_decreasing
ENSG00000073614.12_2	2.03099	0.255146	2.11428e-14	1.90632	0.23382	5.30919e-15	ENSG00000073614	KDM5A	5927	protein_coding	both_decreasing
ENSG00000073711.10_2	2.52068	0.241784	4.75526e-24	2.09546	0.254555	2.82025e-15	ENSG00000073711	PPP2R3A	5523	protein_coding	both_decreasing
ENSG00000073712.14_2	1.25744	0.223886	1.19348e-07	1.32956	0.23113	6.37719e-08	ENSG00000073712	FERMT2	10979	protein_coding	both_decreasing
ENSG00000073792.15_1	6.39219	0.419736	2.05325e-50	6.27264	0.401067	5.20829e-53	ENSG00000073792	IGF2BP2	10644	protein_coding	both_decreasing
ENSG00000073849.14_2	1.55446	0.215812	5.93137e-12	1.42135	0.20704	6.82562e-11	ENSG00000073849	ST6GAL1	6480	protein_coding	both_decreasing
ENSG00000073861.2_1	4.36554	1.18209	0.000743396	4.13745	1.01195	0.000186481	ENSG00000073861	TBX21	30009	protein_coding	both_decreasing
ENSG00000073921.17_2	0.753493	0.179812	0.00010875	0.705134	0.192466	0.000930964	ENSG00000073921	PICALM	8301	protein_coding	both_decreasing
ENSG00000074047.21_2	3.23799	0.667173	5.84511e-06	3.04059	0.616724	4.63099e-06	ENSG00000074047	GLI2	2736	protein_coding	both_decreasing
ENSG00000074054.17_2	1.91632	0.295877	7.50855e-10	1.73534	0.170741	7.84514e-23	ENSG00000074054	CLASP1	23332	protein_coding	both_decreasing
ENSG00000074219.13_2	2.53178	0.610983	0.000131348	2.11692	0.558735	0.000591712	ENSG00000074219	TEAD2	8463	protein_coding	both_decreasing
ENSG00000074276.10_1	2.22886	0.319579	2.86339e-11	1.84843	0.303492	9.11057e-09	ENSG00000074276	CDHR2	54825	protein_coding	both_decreasing
ENSG00000074319.12_2	0.718615	0.178756	0.000216066	1.19131	0.234153	2.15302e-06	ENSG00000074319	TSG101	7251	protein_coding	both_decreasing
ENSG00000074356.16_1	1.74305	0.229941	3.80938e-13	1.24203	0.222727	1.68598e-07	ENSG00000074356	C17orf85	55421	protein_coding	both_decreasing
ENSG00000074410.13_1	3.404	0.57891	2.72485e-08	3.84413	0.463716	1.77061e-15	ENSG00000074410	CA12	771	protein_coding	both_decreasing
ENSG00000074527.11_1	0.730682	0.227522	0.0038154	0.699719	0.234632	0.00855177	ENSG00000074527	NTN4	59277	protein_coding	both_decreasing
ENSG00000074582.12_1	0.88261	0.251093	0.0013984	0.804758	0.250454	0.00422386	ENSG00000074582	BCS1L	617	protein_coding	both_decreasing
ENSG00000074657.13_2	2.20258	0.24416	3.14422e-18	1.39507	0.183705	3.97432e-13	ENSG00000074657	ZNF532	55205	protein_coding	both_decreasing
ENSG00000074695.5_1	0.590739	0.203524	0.00962958	0.586157	0.203559	0.0114683	ENSG00000074695	LMAN1	3998	protein_coding	both_decreasing
ENSG00000074755.14_2	1.02649	0.305387	0.00235863	0.467007	0.184045	0.0286501	ENSG00000074755	ZZEF1	23140	protein_coding	both_decreasing
ENSG00000074855.10_2	2.47442	0.465321	5.88609e-07	1.66419	0.245293	1.16971e-10	ENSG00000074855	ANO8	57719	protein_coding	both_decreasing
ENSG00000074964.16_1	1.21722	0.221739	2.38351e-07	0.839715	0.19995	0.000119333	ENSG00000074964	ARHGEF10L	55160	protein_coding	both_decreasing
ENSG00000075213.10_2	3.22839	0.26251	4.08162e-33	3.34444	0.262913	2.58467e-35	ENSG00000075213	SEMA3A	10371	protein_coding	both_decreasing
ENSG00000075218.18_1	4.52049	0.883469	1.62578e-06	4.46731	0.739865	1.24171e-08	ENSG00000075218	GTSE1	51512	protein_coding	both_decreasing
ENSG00000075223.13_1	4.53622	0.242107	5.30874e-76	4.73797	0.19793	1.36691e-123	ENSG00000075223	SEMA3C	10512	protein_coding	both_decreasing
ENSG00000075275.16_2	2.72164	0.572193	9.18762e-06	2.69359	0.491871	2.89615e-07	ENSG00000075275	CELSR1	9620	protein_coding	both_decreasing
ENSG00000075292.18_2	0.671409	0.151715	4.03744e-05	0.485343	0.181253	0.0199771	ENSG00000075292	ZNF638	100507113	protein_coding	both_decreasing
ENSG00000075340.22_1	1.40721	0.217078	7.25269e-10	1.23521	0.201518	7.21692e-09	ENSG00000075340	ADD2	119	protein_coding	both_decreasing
ENSG00000075407.18_2	1.14394	0.230872	3.59827e-06	0.745793	0.200279	0.000750517	ENSG00000075407	ZNF37A	101929740	protein_coding	both_decreasing
ENSG00000075413.17_2	0.835575	0.168113	3.33986e-06	0.533585	0.223447	0.0412937	ENSG00000075413	MARK3	4140	protein_coding	both_decreasing
ENSG00000075461.5_1	3.2645	0.191685	6.47729e-63	3.04134	0.20125	1.50648e-49	ENSG00000075461	CACNG4	101929306	protein_coding	both_decreasing
ENSG00000075568.16_1	0.801248	0.215786	0.000691531	0.648886	0.20902	0.00592057	ENSG00000075568	TMEM131	23505	protein_coding	both_decreasing
ENSG00000075618.17_1	1.23455	0.166696	1.37791e-12	1.4635	0.17909	4.56893e-15	ENSG00000075618	FSCN1	6624	protein_coding	both_decreasing
ENSG00000075856.11_2	0.792753	0.230974	0.00186021	0.629926	0.180678	0.00172952	ENSG00000075856	SART3	9733	protein_coding	both_decreasing
ENSG00000075884.12_2	1.92231	0.549262	0.00147273	2.32185	0.567191	0.000182903	ENSG00000075884	ARHGAP15	101928361	protein_coding	both_decreasing
ENSG00000076003.4_1	1.39267	0.192467	4.70852e-12	1.6529	0.238678	4.54781e-11	ENSG00000076003	MCM6	4175	protein_coding	both_decreasing
ENSG00000076053.10_2	1.13385	0.262437	6.34717e-05	0.862107	0.285821	0.00773425	ENSG00000076053	RBM7	10179	protein_coding	both_decreasing
ENSG00000076108.11_1	1.12889	0.291636	0.000383828	0.506912	0.213633	0.0427996	ENSG00000076108	BAZ2A	11176	protein_coding	both_decreasing
ENSG00000076201.14_1	1.11987	0.328244	0.00199208	0.752189	0.181283	0.000146294	ENSG00000076201	PTPN23	25930	protein_coding	both_decreasing
ENSG00000076242.14_1	0.674961	0.200662	0.00233904	0.673321	0.229076	0.00970054	ENSG00000076242	MLH1	4292	protein_coding	both_decreasing
ENSG00000076248.10_1	0.834263	0.279198	0.0075136	1.12275	0.274373	0.000183965	ENSG00000076248	UNG	7374	protein_coding	both_decreasing
ENSG00000076321.10_2	1.45128	0.313513	1.64557e-05	1.23311	0.239075	1.51359e-06	ENSG00000076321	KLHL20	27252	protein_coding	both_decreasing
ENSG00000076356.6_1	1.78601	0.285089	2.79616e-09	1.73367	0.201132	1.15619e-16	ENSG00000076356	PLXNA2	5362	protein_coding	both_decreasing
ENSG00000076604.14_2	2.9285	0.236615	1.5553e-33	2.48869	0.242045	2.41458e-23	ENSG00000076604	TRAF4	9618	protein_coding	both_decreasing
ENSG00000076650.6_1	0.84467	0.23924	0.0013242	0.971378	0.259373	0.0006938	ENSG00000076650	GPATCH1	55094	protein_coding	both_decreasing
ENSG00000076685.18_2	2.22993	0.470476	9.9191e-06	1.65552	0.22594	2.77088e-12	ENSG00000076685	NT5C2	22978	protein_coding	both_decreasing
ENSG00000076826.9_1	1.84556	0.209667	2.13592e-17	1.63034	0.223975	3.92047e-12	ENSG00000076826	CAMSAP3	57662	protein_coding	both_decreasing
ENSG00000077044.10_2	2.67196	0.258702	1.28398e-23	2.0706	0.191668	1.09199e-25	ENSG00000077044	DGKD	8527	protein_coding	both_decreasing
ENSG00000077063.10_2	2.50939	0.305736	3.00752e-15	1.83154	0.192099	3.40788e-20	ENSG00000077063	CTTNBP2	83992	protein_coding	both_decreasing
ENSG00000077080.9_1	0.71843	0.227347	0.0044688	1.29154	0.230308	1.42329e-07	ENSG00000077080	ACTL6B	51412	protein_coding	both_decreasing
ENSG00000077097.14_2	2.07115	0.167535	1.84737e-33	2.08252	0.179206	1.36688e-29	ENSG00000077097	TOP2B	7155	protein_coding	both_decreasing
ENSG00000077279.17_2	7.37107	0.246268	1.95959e-193	6.64908	0.206066	8.24981e-225	ENSG00000077279	DCX	1641	protein_coding	both_decreasing
ENSG00000077312.8_2	0.734037	0.218977	0.00243078	1.31988	0.262824	2.98248e-06	ENSG00000077312	SNRPA	6626	protein_coding	both_decreasing
ENSG00000077380.15_2	1.56052	0.185119	4.91499e-16	1.55456	0.180475	1.21495e-16	ENSG00000077380	DYNC1I2	1781	protein_coding	both_decreasing
ENSG00000077458.12_1	2.35576	0.207563	2.45397e-28	1.18351	0.221585	5.90171e-07	ENSG00000077458	FAM76B	143684	protein_coding	both_decreasing
ENSG00000077463.14_2	0.661279	0.244157	0.0164504	0.598063	0.221732	0.0189802	ENSG00000077463	SIRT6	51548	protein_coding	both_decreasing
ENSG00000077514.8_2	1.34255	0.242548	1.85913e-07	1.00385	0.259127	0.000431516	ENSG00000077514	POLD3	10714	protein_coding	both_decreasing
ENSG00000077942.18_2	2.4636	0.254449	7.24646e-21	3.21291	0.278453	3.52387e-29	ENSG00000077942	FBLN1	2192	protein_coding	both_decreasing
ENSG00000078018.19_2	0.6918	0.207829	0.0026237	0.530626	0.209212	0.028736	ENSG00000078018	MAP2	4133	protein_coding	both_decreasing
ENSG00000078177.13_2	4.39922	0.285906	1.87358e-51	3.34411	0.269223	1.06979e-33	ENSG00000078177	N4BP2	55728	protein_coding	both_decreasing
ENSG00000078246.16_2	1.47566	0.30135	4.76069e-06	1.21191	0.28887	0.000121454	ENSG00000078246	TULP3	7289	protein_coding	both_decreasing
ENSG00000078549.14_2	0.877102	0.28894	0.00651827	1.04444	0.213704	5.67885e-06	ENSG00000078549	ADCYAP1R1	117	protein_coding	both_decreasing
ENSG00000078674.17_1	1.19118	0.20289	2.87321e-08	0.817686	0.215508	0.000579718	ENSG00000078674	PCM1	5108	protein_coding	both_decreasing
ENSG00000078687.17_2	1.45562	0.242897	1.42443e-08	0.935656	0.218973	8.82663e-05	ENSG00000078687	TNRC6C	57690	protein_coding	both_decreasing
ENSG00000078699.21_1	1.25337	0.224339	1.402e-07	0.762664	0.205737	0.000797095	ENSG00000078699	CBFA2T2	9139	protein_coding	both_decreasing
ENSG00000079102.16_2	3.63648	0.250489	7.22926e-46	3.51382	0.229971	1.26946e-50	ENSG00000079102	RUNX1T1	862	protein_coding	both_decreasing
ENSG00000079150.17_1	2.45813	0.463017	6.15417e-07	2.82056	0.410889	6.84979e-11	ENSG00000079150	FKBP7	51661	protein_coding	both_decreasing
ENSG00000079246.15_2	1.57151	0.149745	2.33953e-24	1.8139	0.20264	6.61392e-18	ENSG00000079246	XRCC5	7520	protein_coding	both_decreasing
ENSG00000079387.13_2	1.8642	0.253367	1.95979e-12	1.28827	0.252681	2.03814e-06	ENSG00000079387	SENP1	29843	protein_coding	both_decreasing
ENSG00000079432.7_2	1.47294	0.327816	3.01358e-05	1.03842	0.227752	2.56095e-05	ENSG00000079432	CIC	23152	protein_coding	both_decreasing
ENSG00000079459.12_2	1.02116	0.169104	1.08927e-08	1.66201	0.189696	3.44291e-17	ENSG00000079459	FDFT1	2222	protein_coding	both_decreasing
ENSG00000079462.7_1	2.60949	0.348556	7.61882e-13	3.97305	0.253974	4.97369e-53	ENSG00000079462	PAFAH1B3	5050	protein_coding	both_decreasing
ENSG00000079482.12_2	1.61998	0.297461	3.01264e-07	1.00842	0.202038	3.45727e-06	ENSG00000079482	OPHN1	4983	protein_coding	both_decreasing
ENSG00000079616.12_1	0.82748	0.319757	0.0225965	1.2333	0.225721	3.09232e-07	ENSG00000079616	KIF22	3835	protein_coding	both_decreasing
ENSG00000079689.13_1	2.94609	0.401507	2.26783e-12	3.77453	0.490585	1.88457e-13	ENSG00000079689	SCGN	10590	protein_coding	both_decreasing
ENSG00000079950.13_1	1.13078	0.152308	1.20818e-12	1.29809	0.193009	1.72166e-10	ENSG00000079950	STX7	8417	protein_coding	both_decreasing
ENSG00000080298.15_2	1.73349	0.211367	3.16443e-15	1.17248	0.209044	1.41661e-07	ENSG00000080298	RFX3	5991	protein_coding	both_decreasing
ENSG00000080345.17_2	0.762053	0.202032	0.000557084	0.688417	0.186556	0.000846599	ENSG00000080345	RIF1	101929336	protein_coding	both_decreasing
ENSG00000080503.21_2	0.683876	0.1709	0.000232039	0.844161	0.193541	6.07489e-05	ENSG00000080503	SMARCA2	6595	protein_coding	both_decreasing
ENSG00000080603.16_2	1.52481	0.407899	0.000631208	1.25051	0.330828	0.00061064	ENSG00000080603	SRCAP	10847	protein_coding	both_decreasing
ENSG00000080608.9_1	1.323	0.279948	1.05773e-05	1.75874	0.28551	5.99701e-09	ENSG00000080608	KIAA0020	9933	protein_coding	both_decreasing
ENSG00000080802.18_1	0.989184	0.200424	3.95549e-06	1.18665	0.214043	2.0122e-07	ENSG00000080802	CNOT4	4850	protein_coding	both_decreasing
ENSG00000080815.18_2	1.00227	0.22375	3.19698e-05	1.15155	0.210332	2.91682e-07	ENSG00000080815	PSEN1	5663	protein_coding	both_decreasing
ENSG00000080839.11_2	2.78293	0.345323	9.79632e-15	1.83827	0.341715	4.81665e-07	ENSG00000080839	RBL1	5933	protein_coding	both_decreasing
ENSG00000080986.12_1	4.81958	0.950665	2.05516e-06	6.06805	1.03978	3.96582e-08	ENSG00000080986	NDC80	10403	protein_coding	both_decreasing
ENSG00000081019.13_1	1.44093	0.166913	9.04929e-17	1.41908	0.210084	1.42009e-10	ENSG00000081019	RSBN1	54665	protein_coding	both_decreasing
ENSG00000081177.18_1	1.00059	0.208017	7.17284e-06	0.58863	0.195302	0.00778743	ENSG00000081177	EXD2	55218	protein_coding	both_decreasing
ENSG00000081181.7_1	1.23066	0.238272	1.27887e-06	1.59868	0.323186	4.28083e-06	ENSG00000081181	ARG2	384	protein_coding	both_decreasing
ENSG00000081189.14_2	1.55369	0.195386	2.25413e-14	1.41577	0.228458	4.80604e-09	ENSG00000081189	MEF2C	4208	protein_coding	both_decreasing
ENSG00000081386.12_1	1.51826	0.291921	1.06764e-06	1.15934	0.242855	9.67929e-06	ENSG00000081386	ZNF510	22869	protein_coding	both_decreasing
ENSG00000081665.13_2	1.01016	0.240479	0.000104376	0.77868	0.237839	0.00348082	ENSG00000081665	ZNF506	440515	protein_coding	both_decreasing
ENSG00000081721.11_1	0.738113	0.30761	0.0361624	0.882227	0.241874	0.000986087	ENSG00000081721	DUSP12	11266	protein_coding	both_decreasing
ENSG00000081853.14_2	3.38794	0.526867	1.00235e-09	3.70975	0.37588	1.40377e-21	ENSG00000081853	PCDHGA2	56113	protein_coding	both_decreasing
ENSG00000082068.8_1	1.14294	0.200901	8.00762e-08	1.31768	0.236005	1.62597e-07	ENSG00000082068	WDR70	55100	protein_coding	both_decreasing
ENSG00000082146.12_1	1.23102	0.238426	1.29035e-06	0.741896	0.256362	0.0110096	ENSG00000082146	STRADB	55437	protein_coding	both_decreasing
ENSG00000082153.17_2	0.708406	0.148018	8.01845e-06	0.878162	0.209676	0.000125023	ENSG00000082153	BZW1	9689	protein_coding	both_decreasing
ENSG00000082212.11_1	0.683973	0.161607	9.17615e-05	0.77033	0.198366	0.000416544	ENSG00000082212	ME2	4200	protein_coding	both_decreasing
ENSG00000082482.13_2	2.71767	0.217719	4.24578e-34	2.8067	0.210881	1.36846e-38	ENSG00000082482	KCNK2	3776	protein_coding	both_decreasing
ENSG00000082516.8_1	1.08234	0.214123	2.21241e-06	0.898153	0.237701	0.000613805	ENSG00000082516	GEMIN5	25929	protein_coding	both_decreasing
ENSG00000082701.14_2	0.8388	0.16839	3.16472e-06	0.725889	0.198868	0.000977477	ENSG00000082701	GSK3B	2932	protein_coding	both_decreasing
ENSG00000082805.19_2	2.62368	0.247727	8.73255e-25	2.39562	0.208553	6.23945e-29	ENSG00000082805	ERC1	23085	protein_coding	both_decreasing
ENSG00000082898.16_1	1.06417	0.200878	6.52542e-07	0.633033	0.177651	0.00132476	ENSG00000082898	XPO1	7514	protein_coding	both_decreasing
ENSG00000083093.9_1	1.48534	0.262006	8.92442e-08	0.826987	0.289719	0.0123298	ENSG00000083093	PALB2	79728	protein_coding	both_decreasing
ENSG00000083168.9_2	2.37362	0.242783	2.91876e-21	2.17014	0.201016	1.17734e-25	ENSG00000083168	KAT6A	7994	protein_coding	both_decreasing
ENSG00000083223.17_1	1.57657	0.233659	1.30841e-10	1.36572	0.258786	8.2235e-07	ENSG00000083223	ZCCHC6	79670	protein_coding	both_decreasing
ENSG00000083290.19_1	1.28613	0.219871	3.25148e-08	0.536812	0.194688	0.0161238	ENSG00000083290	ULK2	9706	protein_coding	both_decreasing
ENSG00000083312.17_1	2.06462	0.174135	7.8251e-31	1.94007	0.17993	1.35483e-25	ENSG00000083312	TNPO1	3842	protein_coding	both_decreasing
ENSG00000083520.14_1	0.935171	0.176872	6.88439e-07	0.679878	0.209905	0.00389577	ENSG00000083520	DIS3	22894	protein_coding	both_decreasing
ENSG00000083535.15_2	1.63669	0.333838	4.62922e-06	1.21526	0.25977	1.50395e-05	ENSG00000083535	PIBF1	10464	protein_coding	both_decreasing
ENSG00000083814.13_2	1.82324	0.274137	2.45514e-10	1.48395	0.252734	3.24549e-08	ENSG00000083814	ZNF671	79891	protein_coding	both_decreasing
ENSG00000083828.15_2	2.58564	0.299965	1.00678e-16	2.12313	0.332168	1.45975e-09	ENSG00000083828	ZNF586	54807	protein_coding	both_decreasing
ENSG00000083838.15_2	1.59217	0.347889	2.08268e-05	1.03469	0.281594	0.00089591	ENSG00000083838	ZNF446	55663	protein_coding	both_decreasing
ENSG00000083844.10_2	1.40751	0.294515	8.27751e-06	0.617789	0.225807	0.01709	ENSG00000083844	ZNF264	9422	protein_coding	both_decreasing
ENSG00000083845.8_1	1.14317	0.362819	0.00459459	1.81914	0.217573	9.91612e-16	ENSG00000083845	RPS5	6193	protein_coding	both_decreasing
ENSG00000083896.12_2	1.01516	0.145184	2.54321e-11	1.17571	0.180741	7.14587e-10	ENSG00000083896	YTHDC1	91746	protein_coding	both_decreasing
ENSG00000084092.6_1	1.24176	0.191022	6.45283e-10	1.24657	0.246433	2.48688e-06	ENSG00000084092	NOA1	84273	protein_coding	both_decreasing
ENSG00000084628.9_1	4.02718	0.181341	1.56379e-106	3.48519	0.240215	1.02175e-45	ENSG00000084628	NKAIN1	79570	protein_coding	both_decreasing
ENSG00000084676.15_1	1.57247	0.249928	2.3738e-09	1.39831	0.178965	7.62434e-14	ENSG00000084676	NCOA1	8648	protein_coding	both_decreasing
ENSG00000084733.10_1	1.04484	0.171526	7.99566e-09	1.33801	0.187938	1.20255e-11	ENSG00000084733	RAB10	10890	protein_coding	both_decreasing
ENSG00000085185.15_2	2.26488	0.337095	1.57605e-10	2.47462	0.220127	9.46437e-28	ENSG00000085185	BCORL1	63035	protein_coding	both_decreasing
ENSG00000085224.21_2	1.55321	0.181463	1.68202e-16	1.71631	0.192082	7.61751e-18	ENSG00000085224	ATRX	546	protein_coding	both_decreasing
ENSG00000085365.17_1	0.537705	0.145814	0.000758612	0.758546	0.185153	0.00018067	ENSG00000085365	SCAMP1	9522	protein_coding	both_decreasing
ENSG00000085433.15_2	0.728349	0.171806	8.9137e-05	0.794026	0.200249	0.000304068	ENSG00000085433	WDR47	22911	protein_coding	both_decreasing
ENSG00000085491.15_1	1.3029	0.309869	0.00010267	1.07742	0.313697	0.00205857	ENSG00000085491	SLC25A24	29957	protein_coding	both_decreasing
ENSG00000085552.16_1	7.42746	0.513163	1.35125e-45	8.21189	0.562651	3.02207e-46	ENSG00000085552	IGSF9	57549	protein_coding	both_decreasing
ENSG00000085719.12_2	1.85912	0.202369	7.15486e-19	1.72847	0.229759	6.6778e-13	ENSG00000085719	CPNE3	8895	protein_coding	both_decreasing
ENSG00000085721.12_1	1.65902	0.1808	7.87957e-19	1.41957	0.202699	2.68129e-11	ENSG00000085721	RRN3	54700	protein_coding	both_decreasing
ENSG00000085741.12_1	1.56318	0.665088	0.0406618	2.33068	0.703507	0.00307061	ENSG00000085741	WNT11	7481	protein_coding	both_decreasing
ENSG00000085840.12_1	2.28337	0.689125	0.0027595	2.70381	0.761541	0.0013842	ENSG00000085840	ORC1	4998	protein_coding	both_decreasing
ENSG00000085872.14_2	1.49802	0.303798	4.04303e-06	1.20246	0.199356	1.28883e-08	ENSG00000085872	CHERP	10523	protein_coding	both_decreasing
ENSG00000086015.20_1	2.09189	0.307005	8.41418e-11	1.69137	0.19245	2.72864e-17	ENSG00000086015	MAST2	23139	protein_coding	both_decreasing
ENSG00000086189.9_1	0.770906	0.170196	2.56624e-05	0.86902	0.212546	0.000186481	ENSG00000086189	DIMT1	27292	protein_coding	both_decreasing
ENSG00000086475.14_1	0.574463	0.198573	0.0098933	0.726252	0.203198	0.00127834	ENSG00000086475	SEPHS1	22929	protein_coding	both_decreasing
ENSG00000086570.12_1	1.91704	0.629343	0.00631543	1.4871	0.542673	0.0168744	ENSG00000086570	FAT2	2196	protein_coding	both_decreasing
ENSG00000086589.11_1	0.789282	0.164259	7.33936e-06	1.02928	0.208989	4.74869e-06	ENSG00000086589	RBM22	55696	protein_coding	both_decreasing
ENSG00000086758.15_2	1.0335	0.246673	0.000109043	0.828654	0.1773	1.53469e-05	ENSG00000086758	HUWE1	10075	protein_coding	both_decreasing
ENSG00000086848.14_2	1.11263	0.229239	5.83854e-06	0.602731	0.247572	0.0369925	ENSG00000086848	ALG9	79796	protein_coding	both_decreasing
ENSG00000087074.7_2	0.690521	0.186532	0.000720531	0.653937	0.205741	0.00470487	ENSG00000087074	PPP1R15A	23645	protein_coding	both_decreasing
ENSG00000087087.18_2	0.876682	0.19687	3.58134e-05	0.907501	0.209299	6.77689e-05	ENSG00000087087	SRRT	51593	protein_coding	both_decreasing
ENSG00000087206.16_2	1.69211	0.222613	3.27298e-13	1.33149	0.251097	7.21059e-07	ENSG00000087206	UIMC1	51720	protein_coding	both_decreasing
ENSG00000087245.12_2	1.73689	0.586917	0.00818165	3.37892	0.839964	0.00024317	ENSG00000087245	MMP2	4313	protein_coding	both_decreasing
ENSG00000087263.16_1	0.488061	0.192051	0.0254082	0.667509	0.228656	0.0102622	ENSG00000087263	OGFOD1	55239	protein_coding	both_decreasing
ENSG00000087266.15_2	3.22154	0.338254	3.23975e-20	3.10417	0.259839	3.11424e-31	ENSG00000087266	SH3BP2	6452	protein_coding	both_decreasing
ENSG00000087301.8_2	1.15533	0.260798	3.9605e-05	0.902049	0.216442	0.0001359	ENSG00000087301	TXNDC16	57544	protein_coding	both_decreasing
ENSG00000087303.17_2	2.73841	0.541623	2.1991e-06	2.53885	0.912534	0.0150732	ENSG00000087303	NID2	22795	protein_coding	both_decreasing
ENSG00000087365.15_2	0.410049	0.147227	0.0133584	1.02009	0.180088	1.04354e-07	ENSG00000087365	SF3B2	10992	protein_coding	both_decreasing
ENSG00000088038.17_2	0.686231	0.266983	0.0236265	0.540208	0.223455	0.0385142	ENSG00000088038	CNOT3	4849	protein_coding	both_decreasing
ENSG00000088205.12_1	0.807958	0.187713	6.80263e-05	0.855895	0.206044	0.000143427	ENSG00000088205	DDX18	8886	protein_coding	both_decreasing
ENSG00000088247.16_2	0.734331	0.266599	0.0145241	1.05304	0.164277	1.3045e-09	ENSG00000088247	KHSRP	8570	protein_coding	both_decreasing
ENSG00000088305.18_1	4.29147	0.424802	1.23058e-22	2.95944	0.325089	1.72119e-18	ENSG00000088305	DNMT3B	1789	protein_coding	both_decreasing
ENSG00000088325.15_1	1.9981	0.586021	0.00200569	3.24426	0.50764	1.46719e-09	ENSG00000088325	TPX2	22974	protein_coding	both_decreasing
ENSG00000088756.12_1	1.78437	0.34872	1.62469e-06	2.14846	0.335913	1.42499e-09	ENSG00000088756	ARHGAP28	79822	protein_coding	both_decreasing
ENSG00000088876.11_2	1.33163	0.296617	3.06471e-05	0.926481	0.283148	0.00350335	ENSG00000088876	ZNF343	79175	protein_coding	both_decreasing
ENSG00000088881.20_2	1.91951	0.33239	4.967e-08	1.3647	0.259725	9.25567e-07	ENSG00000088881	EBF4	57593	protein_coding	both_decreasing
ENSG00000088882.7_1	4.35321	0.462184	8.60941e-20	5.04037	0.472179	4.20751e-25	ENSG00000088882	CPXM1	56265	protein_coding	both_decreasing
ENSG00000088930.7_1	2.25903	0.190845	9.81528e-31	1.90719	0.207109	6.71019e-19	ENSG00000088930	XRN2	22803	protein_coding	both_decreasing
ENSG00000089009.15_1	1.22642	0.307941	0.000249766	2.10874	0.232762	2.54833e-18	ENSG00000089009	RPL6	6128	protein_coding	both_decreasing
ENSG00000089048.14_1	0.57532	0.221908	0.022327	0.708601	0.241304	0.00977616	ENSG00000089048	ESF1	51575	protein_coding	both_decreasing
ENSG00000089050.15_2	1.36266	0.243662	1.36178e-07	1.51993	0.276839	2.68198e-07	ENSG00000089050	RBBP9	10741	protein_coding	both_decreasing
ENSG00000089094.17_2	2.08247	0.254638	3.81168e-15	1.48388	0.183117	7.86539e-15	ENSG00000089094	KDM2B	84678	protein_coding	both_decreasing
ENSG00000089154.10_1	1.25257	0.226767	1.97979e-07	0.863538	0.191513	3.2045e-05	ENSG00000089154	GCN1L1	10985	protein_coding	both_decreasing
ENSG00000089157.15_2	2.03277	0.335278	9.45641e-09	2.1693	0.227829	3.83175e-20	ENSG00000089157	RPLP0	6175	protein_coding	both_decreasing
ENSG00000089280.18_1	0.569098	0.159463	0.00116169	0.892487	0.214409	0.000138705	ENSG00000089280	FUS	2521	protein_coding	both_decreasing
ENSG00000089335.20_2	1.07083	0.175826	8.0511e-09	0.957132	0.194379	4.76979e-06	ENSG00000089335	ZNF302	55900	protein_coding	both_decreasing
ENSG00000089351.14_2	1.79898	0.194114	3.43069e-19	1.62247	0.178127	1.64584e-18	ENSG00000089351	GRAMD1A	57655	protein_coding	both_decreasing
ENSG00000089505.17_2	2.18949	0.704442	0.00524731	1.66836	0.583804	0.0122142	ENSG00000089505	CMTM1	113540	protein_coding	both_decreasing
ENSG00000089639.10_1	2.83047	0.343369	2.26007e-15	2.71717	0.254811	4.7425e-25	ENSG00000089639	GMIP	51291	protein_coding	both_decreasing
ENSG00000089682.16_1	1.74444	0.419594	0.000124191	1.52627	0.354374	7.65496e-05	ENSG00000089682	RBM41	55285	protein_coding	both_decreasing
ENSG00000089685.14_2	4.6285	0.982737	1.13744e-05	3.42363	0.836146	0.00018222	ENSG00000089685	BIRC5	332	protein_coding	both_decreasing
ENSG00000089902.9_1	1.45084	0.220684	4.03095e-10	1.19159	0.223202	5.97885e-07	ENSG00000089902	RCOR1	23186	protein_coding	both_decreasing
ENSG00000089916.17_2	1.72115	0.238334	5.2082e-12	1.47816	0.195518	5.09464e-13	ENSG00000089916	GPATCH2L	55668	protein_coding	both_decreasing
ENSG00000090060.17_1	0.587324	0.203092	0.00992276	0.524195	0.170147	0.00635824	ENSG00000090060	PAPOLA	10914	protein_coding	both_decreasing
ENSG00000090061.17_2	1.75378	0.689789	0.0253456	1.67549	0.398934	0.000119198	ENSG00000090061	CCNK	8812	protein_coding	both_decreasing
ENSG00000090372.14_1	0.844472	0.22884	0.000751242	0.451888	0.184909	0.036186	ENSG00000090372	STRN4	29888	protein_coding	both_decreasing
ENSG00000090530.9_2	1.78571	0.502689	0.00122833	1.16574	0.376064	0.00600745	ENSG00000090530	LEPREL1	55214	protein_coding	both_decreasing
ENSG00000090612.20_2	1.55185	0.243646	1.46728e-09	1.48254	0.273858	4.03067e-07	ENSG00000090612	ZNF268	10795	protein_coding	both_decreasing
ENSG00000090621.13_2	1.32361	0.168798	5.30422e-14	1.05535	0.180242	3.5563e-08	ENSG00000090621	PABPC4	100996696	protein_coding	both_decreasing
ENSG00000090776.5_1	2.99707	0.235871	2.64104e-35	3.43254	0.262841	3.51188e-37	ENSG00000090776	EFNB1	1947	protein_coding	both_decreasing
ENSG00000090889.11_1	3.29498	0.687842	7.85774e-06	3.04047	0.627802	6.9902e-06	ENSG00000090889	KIF4A	24137	protein_coding	both_decreasing
ENSG00000090924.14_2	5.14742	0.343023	5.76955e-49	4.32433	0.276047	3.55735e-53	ENSG00000090924	PLEKHG2	64857	protein_coding	both_decreasing
ENSG00000090932.10_1	1.76285	0.310494	8.51717e-08	2.1623	0.279627	1.41146e-13	ENSG00000090932	DLL3	10683	protein_coding	both_decreasing
ENSG00000091009.7_2	0.817174	0.204046	0.000229101	0.865877	0.224731	0.000466611	ENSG00000091009	RBM27	54439	protein_coding	both_decreasing
ENSG00000091039.16_2	0.93338	0.183027	1.7697e-06	0.972528	0.186362	1.11451e-06	ENSG00000091039	OSBPL8	114882	protein_coding	both_decreasing
ENSG00000091490.10_2	2.27691	0.271705	7.40268e-16	2.49901	0.243394	2.78352e-23	ENSG00000091490	SEL1L3	23231	protein_coding	both_decreasing
ENSG00000091527.15_1	0.416372	0.144614	0.0102889	0.599924	0.184262	0.00369168	ENSG00000091527	CDV3	55573	protein_coding	both_decreasing
ENSG00000091844.7_1	2.32809	0.216528	1.6075e-25	1.94271	0.237588	4.39469e-15	ENSG00000091844	RGS17	26575	protein_coding	both_decreasing
ENSG00000092140.14_1	1.91141	0.215922	1.38194e-17	1.28439	0.220608	4.28925e-08	ENSG00000092140	G2E3	55632	protein_coding	both_decreasing
ENSG00000092148.12_2	0.639956	0.193934	0.00288269	0.563876	0.180974	0.00571632	ENSG00000092148	HECTD1	25831	protein_coding	both_decreasing
ENSG00000092199.17_2	0.681061	0.198997	0.00192347	1.51167	0.190977	3.4548e-14	ENSG00000092199	HNRNPC	3183	protein_coding	both_decreasing
ENSG00000092201.9_1	1.10981	0.194378	7.13331e-08	1.15397	0.198694	4.6521e-08	ENSG00000092201	SUPT16H	11198	protein_coding	both_decreasing
ENSG00000092330.15_1	0.705037	0.179952	0.00032008	1.04136	0.209425	3.77699e-06	ENSG00000092330	TINF2	26277	protein_coding	both_decreasing
ENSG00000092421.16_1	1.10643	0.269621	0.000154838	0.800443	0.214163	0.000713271	ENSG00000092421	SEMA6A	57556	protein_coding	both_decreasing
ENSG00000092470.11_1	2.01612	0.326938	5.08863e-09	2.05166	0.331207	4.87822e-09	ENSG00000092470	WDR76	79968	protein_coding	both_decreasing
ENSG00000092820.17_1	1.43499	0.302353	9.63801e-06	2.01531	0.256737	5.76148e-14	ENSG00000092820	EZR	7430	protein_coding	both_decreasing
ENSG00000092847.11_2	0.591628	0.256946	0.0452967	0.627247	0.195526	0.00429076	ENSG00000092847	AGO1	26523	protein_coding	both_decreasing
ENSG00000092850.11_1	3.48286	0.426135	3.95937e-15	2.72184	0.343995	3.53632e-14	ENSG00000092850	TEKT2	27285	protein_coding	both_decreasing
ENSG00000092853.13_1	1.78602	0.607504	0.00865444	2.20221	0.656517	0.00268177	ENSG00000092853	CLSPN	63967	protein_coding	both_decreasing
ENSG00000092964.17_2	0.704963	0.158925	3.86381e-05	0.839077	0.205018	0.000183524	ENSG00000092964	DPYSL2	1808	protein_coding	both_decreasing
ENSG00000092969.11_1	1.28436	0.413729	0.00530763	1.81034	0.319892	1.07446e-07	ENSG00000092969	TGFB2	7042	protein_coding	both_decreasing
ENSG00000093009.9_1	2.95511	0.864606	0.00195234	3.3276	0.811471	0.000178011	ENSG00000093009	CDC45	8318	protein_coding	both_decreasing
ENSG00000094796.4_1	4.34476	0.494258	2.36576e-17	4.56419	0.54126	5.4759e-16	ENSG00000094796	KRT31	3881	protein_coding	both_decreasing
ENSG00000094916.14_2	1.36445	0.190722	8.31333e-12	1.35325	0.207686	6.67175e-10	ENSG00000094916	CBX5	23468	protein_coding	both_decreasing
ENSG00000094975.13_1	1.25911	0.181854	4.03024e-11	1.06034	0.199267	6.55018e-07	ENSG00000094975	SUCO	51430	protein_coding	both_decreasing
ENSG00000095002.13_2	0.610642	0.197363	0.00547449	0.641072	0.210538	0.00709119	ENSG00000095002	MSH2	4436	protein_coding	both_decreasing
ENSG00000095015.5_1	1.05287	0.267216	0.00029447	0.780456	0.295014	0.021749	ENSG00000095015	MAP3K1	4214	protein_coding	both_decreasing
ENSG00000095319.14_2	1.92687	0.322684	1.6111e-08	1.14249	0.204185	1.52306e-07	ENSG00000095319	NUP188	23511	protein_coding	both_decreasing	NPC Gene
ENSG00000095539.15_2	3.18416	0.324649	2.16064e-21	2.46072	0.226272	5.05179e-26	ENSG00000095539	SEMA4G	57715	protein_coding	both_decreasing
ENSG00000095564.13_1	1.90177	0.296876	1.16483e-09	1.02273	0.229914	4.18922e-05	ENSG00000095564	BTAF1	9044	protein_coding	both_decreasing
ENSG00000095596.11_1	3.58473	0.300572	3.45224e-31	3.99	0.303621	1.22744e-37	ENSG00000095596	CYP26A1	1592	protein_coding	both_decreasing
ENSG00000096063.15_2	1.5166	0.17472	6.06588e-17	1.29312	0.216184	1.72684e-08	ENSG00000096063	SRPK1	6732	protein_coding	both_decreasing
ENSG00000096070.19_2	0.696509	0.242283	0.0104186	0.532809	0.211342	0.0298676	ENSG00000096070	BRPF3	27154	protein_coding	both_decreasing
ENSG00000096401.7_1	0.823145	0.16334	2.38528e-06	1.31496	0.195203	1.60227e-10	ENSG00000096401	CDC5L	988	protein_coding	both_decreasing
ENSG00000096717.11_1	2.19218	0.211926	1.0951e-23	1.76618	0.223034	3.362e-14	ENSG00000096717	SIRT1	23411	protein_coding	both_decreasing
ENSG00000096746.17_1	1.32221	0.189135	2.56811e-11	1.4532	0.176403	2.6866e-15	ENSG00000096746	HNRNPH3	3189	protein_coding	both_decreasing
ENSG00000097007.17_2	2.03897	0.347942	3.06073e-08	1.43024	0.221749	1.01906e-09	ENSG00000097007	ABL1	25	protein_coding	both_decreasing
ENSG00000097033.14_1	2.44715	0.22314	1.61495e-26	1.79356	0.214624	1.02597e-15	ENSG00000097033	SH3GLB1	51100	protein_coding	both_decreasing
ENSG00000099139.13_2	2.15832	0.323223	2.06642e-10	2.083	0.311847	2.33298e-10	ENSG00000099139	PCSK5	5125	protein_coding	both_decreasing
ENSG00000099250.17_2	1.83034	0.302787	1.05001e-08	2.17974	0.304495	9.1575e-12	ENSG00000099250	NRP1	8829	protein_coding	both_decreasing
ENSG00000099260.10_1	3.65222	0.233336	3.14435e-53	3.18053	0.239532	2.05075e-38	ENSG00000099260	PALMD	54873	protein_coding	both_decreasing
ENSG00000099284.13_1	2.89329	0.201326	5.87063e-45	3.25311	0.229635	1.28647e-43	ENSG00000099284	H2AFY2	55506	protein_coding	both_decreasing
ENSG00000099338.22_2	1.97577	0.487094	0.000187225	1.65761	0.40212	0.000163181	ENSG00000099338	CATSPERG	57828	protein_coding	both_decreasing
ENSG00000099385.11_2	1.54482	0.349887	4.21709e-05	2.00008	0.249158	1.44059e-14	ENSG00000099385	BCL7C	9274	protein_coding	both_decreasing
ENSG00000099617.3_1	5.66073	0.62196	1.53275e-18	4.08026	0.441355	4.85606e-19	ENSG00000099617	EFNA2	1943	protein_coding	both_decreasing
ENSG00000099783.11_1	0.662042	0.210919	0.00476853	1.31826	0.181828	4.81718e-12	ENSG00000099783	HNRNPM	4670	protein_coding	both_decreasing
ENSG00000099889.13_1	1.21892	0.250551	5.53261e-06	1.10758	0.243497	2.68362e-05	ENSG00000099889	ARVCF	421	protein_coding	both_decreasing
ENSG00000099937.10_1	3.02031	1.27177	0.0383082	3.06629	0.86015	0.00131791	ENSG00000099937	SERPIND1	3053	protein_coding	both_decreasing
ENSG00000099953.9_2	5.03636	0.572142	2.13134e-17	3.83974	0.454384	4.73237e-16	ENSG00000099953	MMP11	4320	protein_coding	both_decreasing
ENSG00000099954.18_2	3.16756	0.3331	3.70545e-20	2.50535	0.346273	5.35244e-12	ENSG00000099954	CECR2	27443	protein_coding	both_decreasing
ENSG00000099956.18_2	1.41664	0.155089	1.14253e-18	2.12174	0.209735	1.25896e-22	ENSG00000099956	SMARCB1	6598	protein_coding	both_decreasing
ENSG00000099995.18_2	0.565383	0.246078	0.0458254	0.939806	0.180741	1.22466e-06	ENSG00000099995	SF3A1	10291	protein_coding	both_decreasing
ENSG00000100027.14_1	3.11837	0.283763	1.27261e-26	2.19795	0.238133	5.54398e-19	ENSG00000100027	YPEL1	29799	protein_coding	both_decreasing
ENSG00000100065.14_2	1.49331	0.466509	0.00393887	1.4299	0.351178	0.000199535	ENSG00000100065	CARD10	29775	protein_coding	both_decreasing
ENSG00000100075.9_1	1.01742	0.185754	2.54491e-07	1.17952	0.204032	5.41914e-08	ENSG00000100075	SLC25A1	6576	protein_coding	both_decreasing
ENSG00000100105.17_1	2.45676	0.17833	2.26694e-41	2.41812	0.189176	1.19082e-35	ENSG00000100105	PATZ1	23598	protein_coding	both_decreasing
ENSG00000100106.19_2	3.10043	0.265062	4.94403e-30	3.054	0.231712	7.40393e-38	ENSG00000100106	TRIOBP	11078	protein_coding	both_decreasing
ENSG00000100129.17_2	2.43134	0.319299	2.95558e-13	2.4437	0.240856	9.38903e-23	ENSG00000100129	EIF3L	51386	protein_coding	both_decreasing
ENSG00000100139.13_2	2.90221	0.333873	5.46891e-17	2.42287	0.233262	8.30412e-24	ENSG00000100139	MICALL1	85377	protein_coding	both_decreasing
ENSG00000100154.14_1	4.9591	0.193735	2.47308e-141	4.09952	0.195764	9.77208e-95	ENSG00000100154	TTC28	23331	protein_coding	both_decreasing
ENSG00000100167.19_1	1.30261	0.282852	1.83271e-05	0.935328	0.225141	0.000143167	ENSG00000100167	2018-09-03	55964	protein_coding	both_decreasing
ENSG00000100201.19_1	0.905152	0.175116	1.25382e-06	0.604624	0.202699	0.00853876	ENSG00000100201	DDX17	10521	protein_coding	both_decreasing
ENSG00000100207.18_2	1.41212	0.236208	1.54908e-08	1.50841	0.2044	1.89688e-12	ENSG00000100207	TCF20	6942	protein_coding	both_decreasing
ENSG00000100226.15_2	1.58074	0.290608	3.12027e-07	1.51223	0.195941	1.58253e-13	ENSG00000100226	GTPBP1	9567	protein_coding	both_decreasing
ENSG00000100227.17_1	1.16695	0.196796	2.04596e-08	1.43762	0.193859	1.45782e-12	ENSG00000100227	POLDIP3	84271	protein_coding	both_decreasing
ENSG00000100271.16_1	1.49598	0.254788	2.86647e-08	1.93061	0.273586	1.85219e-11	ENSG00000100271	TTLL1	25809	protein_coding	both_decreasing
ENSG00000100281.13_2	1.83163	0.263645	3.42987e-11	1.42313	0.243495	3.77646e-08	ENSG00000100281	HMGXB4	10042	protein_coding	both_decreasing
ENSG00000100297.15_1	2.07533	0.407219	1.79893e-06	2.57915	0.46125	1.55287e-07	ENSG00000100297	MCM5	4174	protein_coding	both_decreasing
ENSG00000100300.17_1	1.12286	0.381548	0.00858385	1.75726	0.332282	7.76844e-07	ENSG00000100300	TSPO	706	protein_coding	both_decreasing
ENSG00000100320.22_2	2.06927	0.237981	5.36216e-17	1.7101	0.168612	9.70569e-23	ENSG00000100320	RBFOX2	23543	protein_coding	both_decreasing
ENSG00000100325.14_2	1.49863	0.258578	4.41518e-08	1.0115	0.22951	5.00735e-05	ENSG00000100325	ASCC2	84164	protein_coding	both_decreasing
ENSG00000100330.15_2	1.21209	0.282563	7.24186e-05	0.803973	0.261757	0.00654223	ENSG00000100330	MTMR3	8897	protein_coding	both_decreasing
ENSG00000100335.13_2	0.635266	0.214528	0.00813846	0.586407	0.192347	0.00701179	ENSG00000100335	MIEF1	54471	protein_coding	both_decreasing
ENSG00000100336.17_2	2.30511	0.689024	0.00248511	5.08447	0.87544	4.65046e-08	ENSG00000100336	APOL4	80832	protein_coding	both_decreasing
ENSG00000100344.10_2	4.56185	0.440996	1.09221e-23	4.22991	0.40407	3.62449e-24	ENSG00000100344	PNPLA3	80339	protein_coding	both_decreasing
ENSG00000100351.16_2	4.45543	0.720777	4.66371e-09	3.6054	0.761194	1.14917e-05	ENSG00000100351	GRAP2	9402	protein_coding	both_decreasing
ENSG00000100353.17_1	0.600084	0.219477	0.0153485	1.26164	0.215475	3.5563e-08	ENSG00000100353	EIF3D	8664	protein_coding	both_decreasing
ENSG00000100393.11_2	1.95197	0.32934	2.08028e-08	1.46855	0.177235	1.82559e-15	ENSG00000100393	EP300	2033	protein_coding	both_decreasing
ENSG00000100410.7_1	0.908903	0.218082	0.000119215	0.729879	0.28861	0.0292805	ENSG00000100410	PHF5A	84844	protein_coding	both_decreasing
ENSG00000100425.18_1	1.83439	0.229909	1.83055e-14	1.10492	0.228326	7.11953e-06	ENSG00000100425	BRD1	23774	protein_coding	both_decreasing
ENSG00000100426.6_2	2.92127	0.229089	1.49844e-35	2.46237	0.225148	2.62355e-26	ENSG00000100426	ZBED4	9889	protein_coding	both_decreasing
ENSG00000100462.15_2	0.726913	0.263659	0.0144195	0.728337	0.226656	0.00422147	ENSG00000100462	PRMT5	10419	protein_coding	both_decreasing
ENSG00000100473.15_1	2.64676	0.366578	5.25649e-12	2.5917	0.394621	4.79335e-10	ENSG00000100473	COCH	1690	protein_coding	both_decreasing
ENSG00000100485.11_1	1.80789	0.182741	9.51301e-22	1.33522	0.20333	4.81753e-10	ENSG00000100485	SOS2	6655	protein_coding	both_decreasing
ENSG00000100503.23_2	1.63606	0.201327	5.75995e-15	0.843005	0.226802	0.000769166	ENSG00000100503	NIN	51199	protein_coding	both_decreasing
ENSG00000100578.14_2	1.30572	0.208375	2.77276e-09	0.861261	0.227819	0.000609764	ENSG00000100578	KIAA0586	9786	protein_coding	both_decreasing
ENSG00000100592.15_1	2.85957	0.187185	1.01468e-50	2.59538	0.227653	1.6393e-28	ENSG00000100592	DAAM1	23002	protein_coding	both_decreasing
ENSG00000100601.9_2	1.0662	0.336973	0.00441507	0.971844	0.351685	0.0158616	ENSG00000100601	ALKBH1	8846	protein_coding	both_decreasing
ENSG00000100603.13_1	0.654935	0.170863	0.00044269	1.18581	0.222599	6.347e-07	ENSG00000100603	SNW1	22938	protein_coding	both_decreasing
ENSG00000100629.16_2	1.82614	0.474468	0.000416977	1.73955	0.461146	0.000628325	ENSG00000100629	CEP128	145508	protein_coding	both_decreasing
ENSG00000100644.16_2	1.25181	0.195055	1.08382e-09	0.887657	0.186231	1.0013e-05	ENSG00000100644	HIF1A	3091	protein_coding	both_decreasing
ENSG00000100678.18_1	0.840005	0.245452	0.00192429	0.778214	0.226958	0.00209623	ENSG00000100678	SLC8A3	6547	protein_coding	both_decreasing
ENSG00000100697.14_1	1.67494	0.245845	8.45998e-11	0.966452	0.210961	2.32085e-05	ENSG00000100697	DICER1	23405	protein_coding	both_decreasing
ENSG00000100722.18_1	0.981828	0.254127	0.000394641	0.674724	0.196913	0.00211171	ENSG00000100722	ZC3H14	79882	protein_coding	both_decreasing
ENSG00000100731.15_2	1.0914	0.186896	3.44255e-08	1.0659	0.220871	7.58756e-06	ENSG00000100731	PCNX	22990	protein_coding	both_decreasing
ENSG00000100796.17_1	1.32067	0.222431	1.9587e-08	1.07491	0.191101	1.29961e-07	ENSG00000100796	SMEK1	55671	protein_coding	both_decreasing
ENSG00000100802.14_2	1.17828	0.357169	0.00289125	1.12424	0.394533	0.0125018	ENSG00000100802	C14orf93	60686	protein_coding	both_decreasing
ENSG00000100813.14_2	1.3024	0.187213	3.2224e-11	1.23267	0.185597	2.98025e-10	ENSG00000100813	ACIN1	22985	protein_coding	both_decreasing
ENSG00000100823.11_2	1.03148	0.196795	8.68916e-07	1.66669	0.200203	1.3288e-15	ENSG00000100823	APEX1	328	protein_coding	both_decreasing
ENSG00000100842.12_1	1.03355	0.440633	0.0411081	0.893191	0.359718	0.0328297	ENSG00000100842	EFS	10278	protein_coding	both_decreasing
ENSG00000100888.12_2	1.46325	0.24339	1.27439e-08	1.28288	0.200108	1.2987e-09	ENSG00000100888	CHD8	57680	protein_coding	both_decreasing
ENSG00000100890.15_2	1.1235	0.379577	0.00817027	1.10478	0.404355	0.0172529	ENSG00000100890	KIAA0391	9692	protein_coding	both_decreasing
ENSG00000100918.12_2	2.90913	0.223904	7.09456e-37	1.80021	0.24369	1.79631e-12	ENSG00000100918	REC8	9985	protein_coding	both_decreasing
ENSG00000100941.8_1	1.40193	0.188454	1.08195e-12	0.953092	0.202446	1.31262e-05	ENSG00000100941	PNN	5411	protein_coding	both_decreasing
ENSG00000100982.11_1	1.1733	0.190159	4.98791e-09	0.894117	0.204515	5.81748e-05	ENSG00000100982	PCIF1	63935	protein_coding	both_decreasing
ENSG00000101003.9_1	1.20242	0.383332	0.00479896	0.964369	0.413831	0.047279	ENSG00000101003	GINS1	9837	protein_coding	both_decreasing
ENSG00000101004.14_2	2.80763	0.321982	4.34676e-17	2.14124	0.238791	5.765e-18	ENSG00000101004	NINL	22981	protein_coding	both_decreasing
ENSG00000101052.12_1	1.5837	0.252049	2.49769e-09	1.56243	0.286672	3.31979e-07	ENSG00000101052	IFT52	51098	protein_coding	both_decreasing
ENSG00000101057.15_1	5.97963	1.12112	5.40856e-07	4.56515	1.09878	0.00014297	ENSG00000101057	MYBL2	4605	protein_coding	both_decreasing
ENSG00000101126.15_2	1.9562	0.163008	1.43105e-31	1.79748	0.169186	7.13467e-25	ENSG00000101126	ADNP	23394	protein_coding	both_decreasing
ENSG00000101134.11_1	3.14272	0.252758	7.7181e-34	3.31201	0.263485	1.68986e-34	ENSG00000101134	DOK5	55816	protein_coding	both_decreasing
ENSG00000101146.12_2	0.678322	0.207217	0.0031359	1.13264	0.217046	1.11463e-06	ENSG00000101146	RAE1	8480	protein_coding	both_decreasing	NPC Gene
ENSG00000101161.7_1	0.697001	0.185319	0.000580248	1.47836	0.194645	3.94376e-13	ENSG00000101161	PRPF6	24148	protein_coding	both_decreasing
ENSG00000101188.4_1	2.67238	0.42347	2.1134e-09	2.64741	0.302531	3.77114e-17	ENSG00000101188	NTSR1	4923	protein_coding	both_decreasing
ENSG00000101191.16_2	1.32184	0.209512	2.13298e-09	1.02506	0.207791	4.56944e-06	ENSG00000101191	DIDO1	11083	protein_coding	both_decreasing
ENSG00000101193.7_1	0.702866	0.163175	6.71356e-05	0.746579	0.191927	0.000406324	ENSG00000101193	GID8	54994	protein_coding	both_decreasing
ENSG00000101236.16_1	1.27068	0.249636	1.85462e-06	0.748684	0.172865	6.91638e-05	ENSG00000101236	RNF24	11237	protein_coding	both_decreasing
ENSG00000101265.15_1	2.21498	0.343773	9.26411e-10	1.80643	0.284484	1.88936e-09	ENSG00000101265	RASSF2	9770	protein_coding	both_decreasing
ENSG00000101266.17_2	0.931377	0.162543	6.37171e-08	1.06634	0.191394	1.73186e-07	ENSG00000101266	CSNK2A1	1457	protein_coding	both_decreasing
ENSG00000101343.14_1	1.19407	0.200953	1.90821e-08	1.45453	0.211577	6.40803e-11	ENSG00000101343	CRNKL1	51340	protein_coding	both_decreasing
ENSG00000101346.12_2	1.04784	0.216701	6.3682e-06	0.835022	0.241465	0.00190157	ENSG00000101346	POFUT1	23509	protein_coding	both_decreasing
ENSG00000101349.16_2	1.53943	0.212153	4.0661e-12	1.21489	0.186457	6.67645e-10	ENSG00000101349	PAK7	57144	protein_coding	both_decreasing
ENSG00000101350.7_1	1.01353	0.246179	0.000146598	0.683201	0.194911	0.00162001	ENSG00000101350	KIF3B	9371	protein_coding	both_decreasing
ENSG00000101367.8_1	2.40613	0.176316	1.33349e-40	2.6601	0.196204	5.1757e-40	ENSG00000101367	MAPRE1	22919	protein_coding	both_decreasing
ENSG00000101407.12_1	1.23897	0.197762	2.79274e-09	1.15125	0.216047	6.29709e-07	ENSG00000101407	TTI1	9675	protein_coding	both_decreasing
ENSG00000101413.11_1	0.621228	0.179003	0.00163058	0.860609	0.216077	0.000283939	ENSG00000101413	RPRD1B	58490	protein_coding	both_decreasing
ENSG00000101442.9_1	0.692535	0.246534	0.0124992	0.756925	0.265633	0.0125018	ENSG00000101442	ACTR5	79913	protein_coding	both_decreasing
ENSG00000101493.10_2	1.18022	0.281531	0.000108039	1.03953	0.319388	0.00370455	ENSG00000101493	ZNF516	9658	protein_coding	both_decreasing
ENSG00000101544.8_1	1.04284	0.207615	2.58437e-06	0.495044	0.202964	0.0365982	ENSG00000101544	ADNP2	22850	protein_coding	both_decreasing
ENSG00000101546.12_2	0.997248	0.255766	0.000343971	1.16847	0.319096	0.00093747	ENSG00000101546	RBFA	79863	protein_coding	both_decreasing
ENSG00000101596.14_2	1.75132	0.186905	1.34728e-19	0.964268	0.21916	5.16396e-05	ENSG00000101596	SMCHD1	23347	protein_coding	both_decreasing
ENSG00000101670.11_2	4.95094	0.651566	3.33442e-13	4.81307	0.571684	6.12013e-16	ENSG00000101670	LIPG	9388	protein_coding	both_decreasing
ENSG00000101680.13_1	2.83516	0.617385	1.94363e-05	1.97598	0.768078	0.0262247	ENSG00000101680	LAMA1	284217	protein_coding	both_decreasing
ENSG00000101745.16_2	1.9433	0.184752	1.83702e-24	1.48912	0.200683	1.41167e-12	ENSG00000101745	ANKRD12	23253	protein_coding	both_decreasing
ENSG00000101746.15_2	1.9179	0.182481	2.00477e-24	1.78185	0.194151	8.83503e-19	ENSG00000101746	NOL4	8715	protein_coding	both_decreasing
ENSG00000101751.10_2	0.930492	0.231592	0.000218128	0.796656	0.207697	0.000496955	ENSG00000101751	POLI	11201	protein_coding	both_decreasing
ENSG00000101811.13_1	1.1897	0.236862	2.5859e-06	0.775017	0.257547	0.00789276	ENSG00000101811	CSTF2	1478	protein_coding	both_decreasing
ENSG00000101868.10_1	1.89531	0.341084	1.655e-07	1.43877	0.30495	1.25186e-05	ENSG00000101868	POLA1	5422	protein_coding	both_decreasing
ENSG00000101871.14_2	2.02509	0.389494	1.07587e-06	1.74221	0.362703	8.41096e-06	ENSG00000101871	MID1	4281	protein_coding	both_decreasing
ENSG00000101958.13_1	4.82766	0.197714	1.15411e-128	4.84497	0.248078	1.84543e-82	ENSG00000101958	GLRA2	2742	protein_coding	both_decreasing
ENSG00000101972.18_2	1.23027	0.220853	1.53381e-07	1.10909	0.195254	9.56564e-08	ENSG00000101972	STAG2	10735	protein_coding	both_decreasing
ENSG00000101974.14_1	3.21319	0.277741	2.1017e-29	2.99413	0.346496	9.61222e-17	ENSG00000101974	ATP11C	286410	protein_coding	both_decreasing
ENSG00000101986.11_1	1.5359	0.404152	0.000501137	1.49581	0.355094	0.000113214	ENSG00000101986	ABCD1	215	protein_coding	both_decreasing
ENSG00000102038.15_2	1.0232	0.186173	2.29935e-07	1.61789	0.194917	1.62275e-15	ENSG00000102038	SMARCA1	6594	protein_coding	both_decreasing
ENSG00000102043.15_2	2.07747	0.75614	0.0148041	2.97372	0.879886	0.00246819	ENSG00000102043	MTMR8	142689	protein_coding	both_decreasing
ENSG00000102098.17_2	2.97297	0.359583	1.85581e-15	2.67829	0.382755	2.78617e-11	ENSG00000102098	SCML2	10389	protein_coding	both_decreasing
ENSG00000102218.5_1	2.1371	0.364343	2.9666e-08	2.00315	0.37993	8.43751e-07	ENSG00000102218	RP2	6102	protein_coding	both_decreasing
ENSG00000102221.13_2	3.14489	0.318205	1.0477e-21	2.42941	0.285154	2.66932e-16	ENSG00000102221	JADE3	9767	protein_coding	both_decreasing
ENSG00000102230.13_1	1.18298	0.313015	0.000542165	1.0314	0.236396	6.04326e-05	ENSG00000102230	PCYT1B	9468	protein_coding	both_decreasing
ENSG00000102271.13_1	1.79547	0.287898	3.32725e-09	1.38308	0.285244	6.81584e-06	ENSG00000102271	KLHL4	56062	protein_coding	both_decreasing
ENSG00000102290.21_2	3.21931	0.305642	1.58915e-24	3.08794	0.335969	7.85027e-19	ENSG00000102290	PCDH11X	27328	protein_coding	both_decreasing
ENSG00000102302.7_1	1.99021	0.259021	1.76069e-13	1.57099	0.199316	4.49405e-14	ENSG00000102302	FGD1	2245	protein_coding	both_decreasing
ENSG00000102316.16_1	0.611139	0.140745	5.77716e-05	1.21053	0.195233	4.71163e-09	ENSG00000102316	MAGED2	10916	protein_coding	both_decreasing
ENSG00000102317.17_1	1.31248	0.309889	9.06282e-05	1.33726	0.274247	5.98896e-06	ENSG00000102317	RBM3	5935	protein_coding	both_decreasing
ENSG00000102349.16_2	2.71615	0.337872	1.14251e-14	2.30297	0.273919	6.73686e-16	ENSG00000102349	KLF8	11279	protein_coding	both_decreasing
ENSG00000102383.13_1	1.10481	0.277238	0.000247496	1.3148	0.309871	9.98969e-05	ENSG00000102383	ZDHHC15	158866	protein_coding	both_decreasing
ENSG00000102384.13_1	3.91993	0.761181	1.3784e-06	2.82269	0.739506	0.000533394	ENSG00000102384	CENPI	2491	protein_coding	both_decreasing
ENSG00000102531.16_2	0.544878	0.197844	0.0145368	0.472476	0.189232	0.0317706	ENSG00000102531	FNDC3A	22862	protein_coding	both_decreasing
ENSG00000102678.6_1	0.616355	0.19045	0.00352542	0.634016	0.239786	0.0218272	ENSG00000102678	FGF9	2254	protein_coding	both_decreasing
ENSG00000102710.19_2	2.26823	0.236865	1.977e-20	1.35511	0.211213	1.26098e-09	ENSG00000102710	SUPT20H	55578	protein_coding	both_decreasing
ENSG00000102743.14_2	1.51949	0.30895	4.29173e-06	1.2091	0.310295	0.000395806	ENSG00000102743	SLC25A15	10166	protein_coding	both_decreasing
ENSG00000102753.9_2	0.808668	0.162342	3.16472e-06	0.718217	0.197785	0.0010447	ENSG00000102753	KPNA3	3839	protein_coding	both_decreasing	NPC Gene
ENSG00000102870.5_1	1.62059	0.207993	7.76949e-14	1.23345	0.19096	9.60466e-10	ENSG00000102870	ZNF629	23361	protein_coding	both_decreasing
ENSG00000102900.12_2	1.80371	0.174096	9.27099e-24	1.69284	0.189644	8.22847e-18	ENSG00000102900	NUP93	9688	protein_coding	both_decreasing	NPC Gene
ENSG00000102921.7_2	1.04754	0.241118	5.72186e-05	0.773874	0.196968	0.000349518	ENSG00000102921	N4BP1	9683	protein_coding	both_decreasing
ENSG00000102924.11_1	1.17891	0.373394	0.00450677	1.32817	0.329901	0.000240037	ENSG00000102924	CBLN1	869	protein_coding	both_decreasing
ENSG00000102935.11_2	2.45622	0.269409	1.33493e-18	2.31127	0.204849	6.03548e-28	ENSG00000102935	ZNF423	23090	protein_coding	both_decreasing
ENSG00000102974.14_1	1.54043	0.170538	2.83534e-18	1.83084	0.19468	1.12583e-19	ENSG00000102974	CTCF	10664	protein_coding	both_decreasing
ENSG00000102984.14_2	1.46474	0.250705	3.38666e-08	1.82998	0.251209	3.76974e-12	ENSG00000102984	ZNF821	55565	protein_coding	both_decreasing
ENSG00000102996.4_1	1.90577	0.228546	1.0407e-15	2.49098	0.267878	2.95699e-19	ENSG00000102996	MMP15	4324	protein_coding	both_decreasing
ENSG00000103044.10_1	4.65006	0.356837	4.34045e-37	3.96757	0.30297	2.20445e-37	ENSG00000103044	HAS3	3038	protein_coding	both_decreasing
ENSG00000103051.18_2	0.425704	0.174342	0.0326526	0.715987	0.209648	0.00219141	ENSG00000103051	COG4	25839	protein_coding	both_decreasing
ENSG00000103056.11_2	2.3926	0.314781	3.27797e-13	1.63894	0.226251	5.03346e-12	ENSG00000103056	SMPD3	55512	protein_coding	both_decreasing
ENSG00000103064.13_2	1.32278	0.25678	1.36703e-06	0.825734	0.270864	0.00701404	ENSG00000103064	SLC7A6	9057	protein_coding	both_decreasing
ENSG00000103126.14_1	1.17181	0.22193	7.14178e-07	0.726642	0.227298	0.00444327	ENSG00000103126	AXIN1	8312	protein_coding	both_decreasing
ENSG00000103160.11_2	1.90875	0.16005	3.46167e-31	1.89397	0.185618	5.26922e-23	ENSG00000103160	HSDL1	83693	protein_coding	both_decreasing
ENSG00000103187.7_1	2.183	0.242363	3.55559e-18	2.36479	0.232095	6.07875e-23	ENSG00000103187	COTL1	23406	protein_coding	both_decreasing
ENSG00000103194.15_1	1.13097	0.154273	2.37571e-12	1.33539	0.179718	1.31028e-12	ENSG00000103194	USP10	9100	protein_coding	both_decreasing
ENSG00000103222.18_1	1.01058	0.298653	0.00218641	0.915532	0.234884	0.000393948	ENSG00000103222	ABCC1	4363	protein_coding	both_decreasing
ENSG00000103342.12_2	0.851743	0.170746	3.05869e-06	0.97525	0.178375	3.03707e-07	ENSG00000103342	GSPT1	2935	protein_coding	both_decreasing
ENSG00000103429.10_1	1.05165	0.18369	6.54481e-08	1.0238	0.21122	6.86644e-06	ENSG00000103429	BFAR	51283	protein_coding	both_decreasing
ENSG00000103460.16_1	4.27205	0.225397	9.3936e-78	4.00399	0.252538	1.81677e-54	ENSG00000103460	TOX3	27324	protein_coding	both_decreasing
ENSG00000103479.15_2	1.33783	0.275346	5.69788e-06	0.801797	0.212035	0.000607469	ENSG00000103479	RBL2	5934	protein_coding	both_decreasing
ENSG00000103495.13_2	1.36641	0.35007	0.000338385	0.717773	0.20842	0.00199475	ENSG00000103495	MAZ	4150	protein_coding	both_decreasing
ENSG00000103549.21_2	1.57532	0.448586	0.00141418	1.37846	0.191617	7.16085e-12	ENSG00000103549	RNF40	9810	protein_coding	both_decreasing
ENSG00000103550.13_2	0.741641	0.22289	0.00263437	0.92625	0.286429	0.00396088	ENSG00000103550	KNOP1	400506	protein_coding	both_decreasing
ENSG00000103653.16_2	1.45733	0.187267	8.33437e-14	1.51236	0.192605	5.66062e-14	ENSG00000103653	CSK	1445	protein_coding	both_decreasing
ENSG00000103671.9_1	1.01526	0.208853	5.63557e-06	1.30403	0.249471	1.0654e-06	ENSG00000103671	TRIP4	9325	protein_coding	both_decreasing
ENSG00000103742.11_1	2.54658	0.315133	8.22851e-15	2.33419	0.262315	1.0495e-17	ENSG00000103742	IGDCC4	57722	protein_coding	both_decreasing
ENSG00000103855.17_1	2.11306	0.213124	7.71326e-22	1.6015	0.241647	3.2587e-10	ENSG00000103855	CD276	80381	protein_coding	both_decreasing
ENSG00000104064.16_1	1.10282	0.234279	1.15012e-05	1.11128	0.207354	5.35755e-07	ENSG00000104064	GABPB1	2553	protein_coding	both_decreasing
ENSG00000104081.13_2	2.06303	0.495078	0.000119511	2.40063	0.506626	1.13885e-05	ENSG00000104081	BMF	90427	protein_coding	both_decreasing
ENSG00000104131.12_2	0.368963	0.155292	0.0382143	0.534707	0.209322	0.0274508	ENSG00000104131	EIF3J	8669	protein_coding	both_decreasing
ENSG00000104133.14_2	1.31038	0.198945	3.72463e-10	0.898425	0.206406	6.31011e-05	ENSG00000104133	SPG11	80208	protein_coding	both_decreasing
ENSG00000104147.8_1	3.13432	1.01457	0.00555016	2.62471	0.936525	0.0142436	ENSG00000104147	OIP5	11339	protein_coding	both_decreasing
ENSG00000104177.17_1	1.08267	0.189757	7.29529e-08	0.889145	0.190921	1.65419e-05	ENSG00000104177	MYEF2	50804	protein_coding	both_decreasing
ENSG00000104218.14_1	1.44194	0.219695	4.32507e-10	0.783629	0.243299	0.00412589	ENSG00000104218	CSPP1	79848	protein_coding	both_decreasing
ENSG00000104219.12_2	1.1706	0.208564	1.21745e-07	1.13526	0.242668	1.50395e-05	ENSG00000104219	ZDHHC2	51201	protein_coding	both_decreasing
ENSG00000104290.10_2	1.11126	0.1627	7.5556e-11	0.876475	0.178699	5.22454e-06	ENSG00000104290	FZD3	7976	protein_coding	both_decreasing
ENSG00000104299.14_2	1.14056	0.238326	8.02497e-06	1.14931	0.275631	0.000134798	ENSG00000104299	INTS9	55756	protein_coding	both_decreasing
ENSG00000104332.11_2	2.75367	0.452268	8.12676e-09	3.08594	0.390786	3.99822e-14	ENSG00000104332	SFRP1	6422	protein_coding	both_decreasing
ENSG00000104356.10_2	1.04526	0.314198	0.00263972	0.758101	0.323585	0.0458998	ENSG00000104356	POP1	10940	protein_coding	both_decreasing
ENSG00000104408.9_2	1.14674	0.256166	3.23786e-05	1.64267	0.227111	5.43604e-12	ENSG00000104408	EIF3E	3646	protein_coding	both_decreasing
ENSG00000104419.14_2	1.11455	0.217479	1.56145e-06	1.31968	0.221772	2.05983e-08	ENSG00000104419	NDRG1	10397	protein_coding	both_decreasing
ENSG00000104427.11_1	1.92951	0.191387	1.50313e-22	2.12229	0.1957	7.02056e-26	ENSG00000104427	ZC2HC1A	51101	protein_coding	both_decreasing
ENSG00000104432.12_2	4.57821	0.889171	1.3844e-06	4.47099	0.80844	2.16483e-07	ENSG00000104432	IL7	3574	protein_coding	both_decreasing
ENSG00000104435.13_1	2.06227	0.15489	1.098e-38	2.44498	0.249494	2.76385e-21	ENSG00000104435	STMN2	11075	protein_coding	both_decreasing
ENSG00000104517.12_2	1.92131	0.243371	3.51599e-14	1.21859	0.206181	2.60055e-08	ENSG00000104517	UBR5	51366	protein_coding	both_decreasing
ENSG00000104549.11_1	2.09857	0.182374	4.22873e-29	2.39239	0.184215	8.91664e-37	ENSG00000104549	SQLE	6713	protein_coding	both_decreasing
ENSG00000104626.14_1	1.49393	0.284375	8.16672e-07	1.17949	0.292111	0.000228779	ENSG00000104626	ERI1	90459	protein_coding	both_decreasing
ENSG00000104660.17_2	0.510053	0.148896	0.00190399	0.595382	0.207582	0.0118489	ENSG00000104660	LEPROTL1	23484	protein_coding	both_decreasing
ENSG00000104738.16_2	0.826678	0.189532	5.31672e-05	1.14407	0.242379	1.23965e-05	ENSG00000104738	MCM4	4173	protein_coding	both_decreasing
ENSG00000104774.12_2	1.58095	0.340121	1.50899e-05	1.23893	0.278849	4.28531e-05	ENSG00000104774	MAN2B1	4125	protein_coding	both_decreasing
ENSG00000104824.16_2	0.810903	0.156366	1.15152e-06	0.824393	0.191996	8.09787e-05	ENSG00000104824	HNRNPL	3191	protein_coding	both_decreasing
ENSG00000104885.17_1	2.23172	0.301547	1.42926e-12	1.76466	0.232053	3.68172e-13	ENSG00000104885	DOT1L	84444	protein_coding	both_decreasing
ENSG00000104889.4_1	2.0201	0.3444	2.96681e-08	2.67387	0.374457	1.03728e-11	ENSG00000104889	RNASEH2A	10535	protein_coding	both_decreasing
ENSG00000104897.9_2	1.84358	0.259193	1.10625e-11	1.95327	0.190396	3.02679e-23	ENSG00000104897	SF3A2	8175	protein_coding	both_decreasing
ENSG00000104960.15_1	0.706479	0.179937	0.000310399	1.03938	0.203948	2.06039e-06	ENSG00000104960	PTOV1	53635	protein_coding	both_decreasing
ENSG00000104967.6_2	1.49099	0.208877	9.30262e-12	1.90386	0.211341	3.99404e-18	ENSG00000104967	NOVA2	4858	protein_coding	both_decreasing
ENSG00000104973.15_2	0.676878	0.216403	0.00493583	0.937527	0.194232	7.55402e-06	ENSG00000104973	MED25	102465480	protein_coding	both_decreasing
ENSG00000105011.8_1	4.25752	1.0825	0.000302709	4.86738	0.974416	3.39449e-06	ENSG00000105011	ASF1B	55723	protein_coding	both_decreasing
ENSG00000105058.11_1	0.718221	0.182847	0.000308584	0.70688	0.23652	0.00839345	ENSG00000105058	FAM32A	26017	protein_coding	both_decreasing
ENSG00000105072.8_2	1.21274	0.384681	0.00457101	1.01271	0.371835	0.0176666	ENSG00000105072	C19orf44	84167	protein_coding	both_decreasing
ENSG00000105088.8_1	0.686159	0.244122	0.0124476	1.13532	0.177231	1.33846e-09	ENSG00000105088	OLFM2	93145	protein_coding	both_decreasing
ENSG00000105143.12_2	1.14986	0.212352	3.54325e-07	1.58622	0.239898	3.59614e-10	ENSG00000105143	SLC1A6	6511	protein_coding	both_decreasing
ENSG00000105193.8_1	0.858278	0.370402	0.0438412	1.66982	0.221622	6.12949e-13	ENSG00000105193	RPS16	6217	protein_coding	both_decreasing
ENSG00000105202.7_2	1.28625	0.312861	0.000150048	2.2175	0.222823	6.3073e-22	ENSG00000105202	FBL	2091	protein_coding	both_decreasing
ENSG00000105229.6_1	0.704267	0.275794	0.0246783	0.642575	0.217934	0.00944324	ENSG00000105229	PIAS4	51588	protein_coding	both_decreasing
ENSG00000105281.12_2	1.65459	0.686411	0.0352288	1.5455	0.655545	0.0443471	ENSG00000105281	SLC1A5	6510	protein_coding	both_decreasing
ENSG00000105323.16_1	1.91967	0.239374	1.32624e-14	2.07823	0.185792	1.7648e-27	ENSG00000105323	HNRNPUL1	11100	protein_coding	both_decreasing
ENSG00000105325.13_1	0.78343	0.162632	6.9366e-06	0.85672	0.221352	0.000437477	ENSG00000105325	FZR1	51343	protein_coding	both_decreasing
ENSG00000105372.6_2	1.26626	0.407628	0.00527498	2.03436	0.212607	2.47557e-20	ENSG00000105372	RPS19	6223	protein_coding	both_decreasing
ENSG00000105373.18_1	1.09274	0.266626	0.000157959	1.49849	0.212953	2.12879e-11	ENSG00000105373	GLTSCR2	692091	protein_coding	both_decreasing
ENSG00000105426.15_2	1.58685	0.411638	0.000407659	1.21065	0.191067	2.0521e-09	ENSG00000105426	PTPRS	5802	protein_coding	both_decreasing
ENSG00000105443.13_2	0.827199	0.243265	0.00207076	1.45043	0.179017	7.93558e-15	ENSG00000105443	CYTH2	9266	protein_coding	both_decreasing
ENSG00000105464.3_1	0.888505	0.308372	0.0102279	1.03909	0.327666	0.00481329	ENSG00000105464	GRIN2D	2906	protein_coding	both_decreasing
ENSG00000105483.16_2	1.17678	0.294351	0.000235418	1.18845	0.313485	0.000586605	ENSG00000105483	CARD8	22900	protein_coding	both_decreasing
ENSG00000105486.13_2	1.49598	0.217152	5.08899e-11	1.81201	0.25823	2.43696e-11	ENSG00000105486	LIG1	3978	protein_coding	both_decreasing
ENSG00000105520.10_1	1.07556	0.183836	3.22952e-08	0.657023	0.173537	0.000597517	ENSG00000105520		64748	protein_coding	both_decreasing
ENSG00000105640.12_1	1.54885	0.313258	3.78728e-06	1.82389	0.224815	7.28623e-15	ENSG00000105640	RPL18A	26780	protein_coding	both_decreasing
ENSG00000105655.18_2	2.57955	0.236298	2.7695e-26	2.19132	0.24251	3.12819e-18	ENSG00000105655	ISYNA1	51477	protein_coding	both_decreasing
ENSG00000105671.11_1	0.834023	0.229424	0.000915366	0.907487	0.217032	0.000128649	ENSG00000105671	DDX49	54555	protein_coding	both_decreasing
ENSG00000105672.14_1	2.5335	0.961936	0.0200909	3.06692	0.912914	0.00263751	ENSG00000105672	ETV2	2116	protein_coding	both_decreasing
ENSG00000105676.13_2	0.71147	0.210303	0.00219168	0.989342	0.220301	3.47007e-05	ENSG00000105676	ARMC6	93436	protein_coding	both_decreasing
ENSG00000105708.8_1	1.11621	0.260571	7.41783e-05	1.36831	0.287881	1.06532e-05	ENSG00000105708	ZNF14	7561	protein_coding	both_decreasing
ENSG00000105717.13_2	2.00313	0.446019	3.04175e-05	1.67318	0.451698	0.00080415	ENSG00000105717	PBX4	80714	protein_coding	both_decreasing
ENSG00000105732.12_2	1.19216	0.210863	9.71164e-08	1.23389	0.238584	1.40936e-06	ENSG00000105732	ZNF574	64763	protein_coding	both_decreasing
ENSG00000105737.9_1	0.737916	0.164842	3.23799e-05	0.44716	0.186656	0.040608	ENSG00000105737	GRIK5	2901	protein_coding	both_decreasing
ENSG00000105750.14_2	2.89625	0.401456	5.47667e-12	2.17775	0.401865	3.91551e-07	ENSG00000105750	ZNF85	7639	protein_coding	both_decreasing
ENSG00000105767.2_1	0.717318	0.178648	0.000220191	0.856286	0.182988	1.49626e-05	ENSG00000105767	CADM4	199731	protein_coding	both_decreasing
ENSG00000105784.15_1	1.09762	0.188306	3.65387e-08	1.00771	0.236834	9.50903e-05	ENSG00000105784	RUNDC3B	154661	protein_coding	both_decreasing
ENSG00000105866.13_1	2.68358	0.245486	2.35784e-26	2.39834	0.225462	6.23812e-25	ENSG00000105866	SP4	6671	protein_coding	both_decreasing
ENSG00000105879.11_1	0.844549	0.174947	6.6135e-06	0.961901	0.208221	1.95258e-05	ENSG00000105879	CBLL1	79872	protein_coding	both_decreasing
ENSG00000105926.15_2	0.896179	0.163461	2.47489e-07	0.66637	0.199599	0.00282063	ENSG00000105926	MPP6	51678	protein_coding	both_decreasing
ENSG00000105928.13_2	0.563258	0.198541	0.0115791	0.72459	0.23847	0.00723342	ENSG00000105928	DFNA5	1687	protein_coding	both_decreasing
ENSG00000106066.14_2	3.038	0.3156	1.23464e-20	3.7344	0.437842	2.46667e-16	ENSG00000106066	CPVL	54504	protein_coding	both_decreasing
ENSG00000106069.20_2	1.77974	0.246777	5.56789e-12	1.44657	0.247105	3.57529e-08	ENSG00000106069	CHN2	644086	protein_coding	both_decreasing
ENSG00000106086.18_2	1.6059	0.181906	1.70407e-17	1.52855	0.224238	9.43788e-11	ENSG00000106086	PLEKHA8	84725	protein_coding	both_decreasing
ENSG00000106144.19_1	2.8843	0.227322	3.30518e-35	2.14655	0.224399	2.54083e-20	ENSG00000106144	CASP2	835	protein_coding	both_decreasing
ENSG00000106261.16_1	0.933026	0.24889	0.000607345	0.60373	0.17221	0.00161703	ENSG00000106261	ZKSCAN1	7586	protein_coding	both_decreasing
ENSG00000106268.15_2	1.12696	0.332919	0.00217807	1.75432	0.349735	3.06992e-06	ENSG00000106268	NUDT1	4521	protein_coding	both_decreasing
ENSG00000106278.11_1	2.36185	0.282607	8.93273e-16	2.52218	0.249416	1.3083e-22	ENSG00000106278	PTPRZ1	5803	protein_coding	both_decreasing
ENSG00000106305.9_1	0.754715	0.262088	0.0102757	1.22057	0.323676	0.000631109	ENSG00000106305	AIMP2	7965	protein_coding	both_decreasing
ENSG00000106330.11_1	1.52963	0.283078	3.76032e-07	1.69029	0.27263	4.72532e-09	ENSG00000106330	MOSPD3	64598	protein_coding	both_decreasing
ENSG00000106333.12_1	1.30352	0.42714	0.00620471	1.33557	0.443765	0.00788278	ENSG00000106333	PCOLCE	5118	protein_coding	both_decreasing
ENSG00000106341.10_1	2.89175	1.01124	0.0108764	3.19437	1.01967	0.0054295	ENSG00000106341	PPP1R17	10842	protein_coding	both_decreasing
ENSG00000106344.8_2	1.18267	0.252115	1.24095e-05	0.604539	0.239346	0.0295005	ENSG00000106344	RBM28	55131	protein_coding	both_decreasing
ENSG00000106346.11_1	2.14718	0.261286	2.77096e-15	1.26628	0.212592	1.9911e-08	ENSG00000106346	USP42	84132	protein_coding	both_decreasing
ENSG00000106348.16_1	0.663849	0.273328	0.0336988	0.490655	0.207336	0.0434429	ENSG00000106348	IMPDH1	3614	protein_coding	both_decreasing
ENSG00000106443.15_1	1.19366	0.179991	2.77648e-10	1.15787	0.187119	5.07477e-09	ENSG00000106443	PHF14	9678	protein_coding	both_decreasing
ENSG00000106462.10_2	5.53979	0.341324	3.43159e-57	4.77362	0.310716	3.52807e-51	ENSG00000106462	EZH2	2146	protein_coding	both_decreasing
ENSG00000106477.18_2	0.786318	0.214731	0.000833141	1.0601	0.233324	2.74457e-05	ENSG00000106477	CEP41	95681	protein_coding	both_decreasing
ENSG00000106484.14_1	0.987059	0.323403	0.00619783	0.933946	0.293238	0.00461164	ENSG00000106484	MEST	4232	protein_coding	both_decreasing
ENSG00000106524.8_1	0.473691	0.191829	0.0305025	0.914212	0.196196	1.63617e-05	ENSG00000106524	ANKMY2	57037	protein_coding	both_decreasing
ENSG00000106571.12_2	2.4441	0.971578	0.0270931	2.40032	0.903129	0.0210643	ENSG00000106571	GLI3	2737	protein_coding	both_decreasing
ENSG00000106665.15_1	0.955626	0.326491	0.00897786	0.898576	0.206389	6.28012e-05	ENSG00000106665	CLIP2	7461	protein_coding	both_decreasing
ENSG00000106689.10_2	1.35749	0.185536	2.6348e-12	1.27197	0.193635	4.75242e-10	ENSG00000106689	LHX2	9355	protein_coding	both_decreasing
ENSG00000106701.11_2	1.66272	0.164446	1.13109e-22	1.42548	0.198059	6.9967e-12	ENSG00000106701	FSD1L	83856	protein_coding	both_decreasing
ENSG00000106714.17_2	2.38942	0.466906	1.61948e-06	1.86218	0.40907	2.64322e-05	ENSG00000106714	CNTNAP3	101927068	protein_coding	both_decreasing
ENSG00000106723.16_1	0.722802	0.177209	0.00017097	0.570019	0.178454	0.00448024	ENSG00000106723	SPIN1	10927	protein_coding	both_decreasing
ENSG00000106780.8_1	0.727015	0.197501	0.000776563	0.662542	0.193683	0.00215167	ENSG00000106780	MEGF9	1955	protein_coding	both_decreasing
ENSG00000106799.12_1	2.87828	0.250955	6.44155e-29	2.57968	0.213171	5.02063e-32	ENSG00000106799	TGFBR1	7046	protein_coding	both_decreasing
ENSG00000106829.18_2	1.81519	0.235637	1.51709e-13	2.0531	0.225947	1.99601e-18	ENSG00000106829	TLE4	7091	protein_coding	both_decreasing
ENSG00000106852.15_1	0.715546	0.280922	0.025056	0.824934	0.212273	0.000412044	ENSG00000106852	LHX6	26468	protein_coding	both_decreasing
ENSG00000107020.9_2	1.19554	0.301136	0.000262337	1.27346	0.403544	0.00505725	ENSG00000107020	PLGRKT	55848	protein_coding	both_decreasing
ENSG00000107105.14_2	0.56886	0.159636	0.00118223	0.655128	0.192712	0.00231141	ENSG00000107105	ELAVL2	1993	protein_coding	both_decreasing
ENSG00000107249.21_2	2.37238	0.292997	7.28332e-15	2.05465	0.322031	1.56628e-09	ENSG00000107249	GLIS3	169792	protein_coding	both_decreasing
ENSG00000107338.9_2	1.86747	0.372223	2.65928e-06	2.45776	0.338021	4.15444e-12	ENSG00000107338	SHB	6461	protein_coding	both_decreasing
ENSG00000107341.4_1	1.00158	0.164858	8.78723e-09	1.21848	0.189144	1.07154e-09	ENSG00000107341	UBE2R2	54926	protein_coding	both_decreasing
ENSG00000107443.15_1	3.09792	0.269392	4.59523e-29	2.4196	0.25586	6.94465e-20	ENSG00000107443	CCNJ	54619	protein_coding	both_decreasing
ENSG00000107581.12_1	0.992389	0.21469	1.69536e-05	1.21332	0.194607	3.82193e-09	ENSG00000107581	EIF3A	8661	protein_coding	both_decreasing
ENSG00000107643.15_2	1.91012	0.170772	1.52595e-27	1.71273	0.210038	5.24999e-15	ENSG00000107643	MAPK8	5599	protein_coding	both_decreasing
ENSG00000107672.14_1	0.680055	0.272302	0.0283981	0.709472	0.250871	0.0132756	ENSG00000107672	NSMCE4A	54780	protein_coding	both_decreasing
ENSG00000107736.19_1	2.142	0.398391	4.32472e-07	1.64365	0.38509	8.99695e-05	ENSG00000107736	CDH23	100653137	protein_coding	both_decreasing
ENSG00000107779.12_2	1.79059	0.203462	2.16707e-17	1.49932	0.228081	4.60681e-10	ENSG00000107779	BMPR1A	657	protein_coding	both_decreasing
ENSG00000107815.7_2	1.66326	0.269456	4.91399e-09	1.33491	0.264051	2.52388e-06	ENSG00000107815	C10orf2	56652	protein_coding	both_decreasing
ENSG00000107854.5_1	1.13356	0.187116	9.72392e-09	0.670436	0.208706	0.00423302	ENSG00000107854	TNKS2	80351	protein_coding	both_decreasing
ENSG00000107882.11_1	1.99745	0.278646	7.52141e-12	1.6268	0.242561	1.95073e-10	ENSG00000107882	SUFU	51684	protein_coding	both_decreasing
ENSG00000107951.8	0.798332	0.231269	0.00173782	0.662851	0.271189	0.0361514	ENSG00000107951	MTPAP	55149	protein_coding	both_decreasing
ENSG00000108021.19_2	1.58702	0.268714	2.3471e-08	0.69605	0.207251	0.00264565	ENSG00000108021	FAM208B	54906	protein_coding	both_decreasing
ENSG00000108055.9_1	2.61151	0.196796	1.95105e-38	2.56216	0.190864	3.03175e-39	ENSG00000108055	SMC3	9126	protein_coding	both_decreasing
ENSG00000108064.10_2	1.3408	0.192475	3.02822e-11	1.10135	0.233648	1.27782e-05	ENSG00000108064	TFAM	7019	protein_coding	both_decreasing
ENSG00000108175.16_1	2.19752	0.275664	1.93163e-14	1.74004	0.217687	1.87435e-14	ENSG00000108175	ZMIZ1	57178	protein_coding	both_decreasing
ENSG00000108219.14_1	2.5267	0.234355	1.17264e-25	1.74445	0.181592	1.74914e-20	ENSG00000108219	TSPAN14	81619	protein_coding	both_decreasing
ENSG00000108239.8_1	0.78604	0.308439	0.0249871	0.620866	0.259965	0.0412643	ENSG00000108239	TBC1D12	23232	protein_coding	both_decreasing
ENSG00000108298.9_1	0.829535	0.319768	0.0222483	1.77613	0.215777	2.83118e-15	ENSG00000108298	RPL19	6143	protein_coding	both_decreasing
ENSG00000108312.14_1	1.03923	0.164184	1.88048e-09	1.33188	0.163961	6.70322e-15	ENSG00000108312	UBTF	7343	protein_coding	both_decreasing
ENSG00000108349.15_2	0.933225	0.195372	8.37385e-06	0.815105	0.201149	0.000215803	ENSG00000108349	CASC3	102466986	protein_coding	both_decreasing
ENSG00000108370.16_2	1.37881	0.313132	4.43728e-05	1.17195	0.365816	0.00434824	ENSG00000108370	RGS9	8787	protein_coding	both_decreasing
ENSG00000108389.9_2	1.17225	0.234887	3.02514e-06	0.7241	0.196899	0.000886107	ENSG00000108389	MTMR4	9110	protein_coding	both_decreasing
ENSG00000108406.9_1	1.05398	0.191762	2.29566e-07	0.896281	0.209996	8.99909e-05	ENSG00000108406	DHX40	79665	protein_coding	both_decreasing
ENSG00000108424.9_2	0.576502	0.234555	0.0313718	0.826799	0.178613	1.87205e-05	ENSG00000108424	KPNB1	3837	protein_coding	both_decreasing	NPC Gene
ENSG00000108448.20_2	1.41037	0.267127	7.15061e-07	0.972467	0.290071	0.00269812	ENSG00000108448	TRIM16L	101930303	protein_coding	both_decreasing
ENSG00000108468.14_2	1.39466	0.190714	2.70765e-12	1.81262	0.206951	3.5227e-17	ENSG00000108468	CBX1	10951	protein_coding	both_decreasing
ENSG00000108510.9_2	1.93856	0.235944	2.80607e-15	1.32176	0.179992	2.46603e-12	ENSG00000108510	MED13	9969	protein_coding	both_decreasing
ENSG00000108559.11_2	1.29836	0.22811	7.88883e-08	1.54735	0.266443	4.65943e-08	ENSG00000108559	NUP88	4927	protein_coding	both_decreasing	NPC Gene
ENSG00000108578.14_1	0.631023	0.223517	0.0120245	0.841107	0.225979	0.000755005	ENSG00000108578	BLMH	642	protein_coding	both_decreasing
ENSG00000108651.9_1	1.00054	0.230229	5.69115e-05	0.692574	0.217241	0.00456661	ENSG00000108651	UTP6	55813	protein_coding	both_decreasing
ENSG00000108654.12_2	1.35497	0.158212	1.61525e-16	0.918167	0.220873	0.000141686	ENSG00000108654	DDX5	100616408	protein_coding	both_decreasing
ENSG00000108821.13_2	3.35838	1.09988	0.00617537	4.00724	1.11635	0.00121168	ENSG00000108821	COL1A1	1277	protein_coding	both_decreasing
ENSG00000108828.15_1	1.83294	0.178069	1.82078e-23	2.06903	0.184949	1.74395e-27	ENSG00000108828	VAT1	10493	protein_coding	both_decreasing
ENSG00000108829.9_2	0.47974	0.199625	0.0358478	0.658797	0.201604	0.00355356	ENSG00000108829	LRRC59	55379	protein_coding	both_decreasing
ENSG00000108848.15_2	1.6189	0.185878	4.74749e-17	0.770623	0.233387	0.00318316	ENSG00000108848	LUC7L3	51747	protein_coding	both_decreasing
ENSG00000108854.15_1	2.0956	0.301188	3.20173e-11	1.30497	0.210843	5.03355e-09	ENSG00000108854	SMURF2	64750	protein_coding	both_decreasing
ENSG00000108883.12_1	0.499746	0.180629	0.0140533	0.699079	0.207442	0.00254864	ENSG00000108883	EFTUD2	9343	protein_coding	both_decreasing
ENSG00000108947.4_1	0.837046	0.244897	0.001952	0.96074	0.191992	3.25308e-06	ENSG00000108947	EFNB3	1949	protein_coding	both_decreasing
ENSG00000108953.16_1	0.407502	0.158068	0.0231711	1.33309	0.201271	3.34551e-10	ENSG00000108953	YWHAE	7531	protein_coding	both_decreasing
ENSG00000108984.13_2	0.887012	0.350027	0.0258766	2.08634	0.423918	4.8264e-06	ENSG00000108984	MAP2K6	5608	protein_coding	both_decreasing
ENSG00000109084.13_1	1.27204	0.227982	1.46003e-07	1.53431	0.259249	2.48257e-08	ENSG00000109084	TMEM97	27346	protein_coding	both_decreasing
ENSG00000109118.13_2	1.66462	0.28181	2.33558e-08	1.25589	0.193339	7.57907e-10	ENSG00000109118	PHF12	57649	protein_coding	both_decreasing
ENSG00000109171.14_1	2.31274	0.212519	3.99327e-26	1.97204	0.194877	1.22111e-22	ENSG00000109171	SLAIN2	57606	protein_coding	both_decreasing
ENSG00000109193.10_2	5.31883	1.11798	9.14685e-06	5.51455	1.08591	2.25417e-06	ENSG00000109193	SULT1E1	6783	protein_coding	both_decreasing
ENSG00000109265.13_2	5.23667	0.497835	1.83018e-24	5.31269	0.218472	1.71987e-127	ENSG00000109265	KIAA1211	57482	protein_coding	both_decreasing
ENSG00000109381.19_2	1.90986	0.194747	2.18067e-21	1.30941	0.205831	1.75938e-09	ENSG00000109381	ELF2	1998	protein_coding	both_decreasing
ENSG00000109576.13_1	1.37469	0.263045	9.39075e-07	1.20798	0.288964	0.000129119	ENSG00000109576	AADAT	51166	protein_coding	both_decreasing
ENSG00000109606.12_1	1.09779	0.175	2.65884e-09	1.30627	0.19758	3.61146e-10	ENSG00000109606	DHX15	1665	protein_coding	both_decreasing
ENSG00000109654.14_2	0.824258	0.182903	2.84424e-05	0.578129	0.194101	0.00864275	ENSG00000109654	TRIM2	23321	protein_coding	both_decreasing
ENSG00000109674.3_1	3.68631	1.14832	0.00382997	3.21707	1.10694	0.010642	ENSG00000109674	NEIL3	55247	protein_coding	both_decreasing
ENSG00000109685.17_2	1.54201	0.206443	8.64823e-13	1.46052	0.171473	2.71434e-16	ENSG00000109685	WHSC1	7468	protein_coding	both_decreasing
ENSG00000109758.8_1	2.31067	0.465025	3.36204e-06	1.40261	0.349105	0.000247947	ENSG00000109758	HGFAC	3083	protein_coding	both_decreasing
ENSG00000109787.12_1	1.52744	0.20614	1.34097e-12	1.32038	0.206275	1.3783e-09	ENSG00000109787	KLF3	51274	protein_coding	both_decreasing
ENSG00000109805.9_1	4.25453	0.726552	3.13805e-08	4.32575	0.649091	2.57716e-10	ENSG00000109805	NCAPG	64151	protein_coding	both_decreasing
ENSG00000109814.11_2	1.47602	0.263374	1.27428e-07	1.45309	0.261626	1.90477e-07	ENSG00000109814	UGDH	7358	protein_coding	both_decreasing
ENSG00000109917.10_2	0.679068	0.178424	0.000490399	0.723293	0.208768	0.00186243	ENSG00000109917	ZNF259	8882	protein_coding	both_decreasing
ENSG00000109944.10_1	1.74132	0.330124	7.32771e-07	1.65458	0.381343	6.69637e-05	ENSG00000109944	C11orf63	79864	protein_coding	both_decreasing
ENSG00000110042.7_1	1.88976	0.209477	3.13784e-18	1.25555	0.198245	2.0903e-09	ENSG00000110042	DTX4	23220	protein_coding	both_decreasing
ENSG00000110047.17_1	1.47121	0.186823	4.10167e-14	1.57732	0.219817	8.14842e-12	ENSG00000110047	EHD1	10938	protein_coding	both_decreasing
ENSG00000110066.14_2	2.23312	0.191174	5.89351e-30	1.90476	0.182551	5.13963e-24	ENSG00000110066	SUV420H1	51111	protein_coding	both_decreasing
ENSG00000110218.8_1	2.60012	0.273492	3.7831e-20	2.83621	0.278875	7.35771e-23	ENSG00000110218	PANX1	24145	protein_coding	both_decreasing
ENSG00000110321.15_2	1.53802	0.176374	4.33467e-17	1.602	0.18765	2.31237e-16	ENSG00000110321	EIF4G2	1982	protein_coding	both_decreasing
ENSG00000110330.8_2	1.0753	0.185722	4.55834e-08	0.931009	0.221168	0.000114591	ENSG00000110330	BIRC2	329	protein_coding	both_decreasing
ENSG00000110344.9_1	1.02997	0.41143	0.0279565	0.788217	0.276459	0.0124481	ENSG00000110344	UBE4A	9354	protein_coding	both_decreasing
ENSG00000110367.11_1	1.46746	0.141918	1.13784e-23	1.45674	0.196882	1.64668e-12	ENSG00000110367	DDX6	1656	protein_coding	both_decreasing
ENSG00000110375.2_1	2.14488	0.677468	0.0043896	1.79019	0.770083	0.0479095	ENSG00000110375	UPK2	7379	protein_coding	both_decreasing
[truncated: 12,184 more rows]

## Sheet: Table S4 Unique Editing Sites
Table S4: Group-Unique A->I editing sites identified in the data
[truncated: 10,392 more rows]

[truncated: 5 more sheets: Table S5 Editing summary, Table S6 RBP Motif Enrichment, Table S7 Gene Sets, Table S8 Gene Set Enrichment, Table S9 ENCODE Enrichment]
